# Supplementary material for: Meta-Analysis Reveals Challenges and Gaps for Genome-to-Phenome Research Underpinning Plant Drought Response
Source: Int J Mol Sci. 2022 Oct 14;23(20):12297. doi: 10.3390/ijms232012297 (PMC9602940; doi:10.3390/ijms232012297)
Supplement: Supplementary file 1 [file ijms-23-12297-s001.zip]

Archive with 7 entries (7 files):
- Supplemental Text S1.pdf
- Table_S1.csv
- Table_S2.csv
- Table_S3.csv
- Table_S4.csv
- Table_S5.csv
- Table_S6.csv
