# Supplementary material for: Meta-Analysis Reveals Challenges and Gaps for Genome-to-Phenome Research Underpinning Plant Drought Response
Source: Int J Mol Sci. 2022 Oct 14;23(20):12297. doi: 10.3390/ijms232012297 (PMC9602940; doi:10.3390/ijms232012297)
Supplement: Supplementary file 1 [file ijms-23-12297-s001.zip › Table_S1.csv]

Table S1. Pubmed IDs for all abstract identified during the query. This list consists of 7,730 abstract IDs, with only 2,642 being represented in the consensus abstract list.
PubmedID
27448723
29846924
23814278
25445265
28549206
17548301
24938820
25957211
22676236
21789178
25336153
30288711
30175125
26856449
26184177
28154243
31323764
23202133
27526320
24313844
31617659
30192796
30801874
30537926
26867623
29875393
27763546
29080153
31126133
30401938
29367235
30862358
28504920
31665169
31794900
28969999
29576089
31677543
31026777
31756607
31710920
28376411
26663562
29467423
31820285
29219729
29039014
31664901
31728533
28124256
31795257
29330721
30668651
30631439
32170020
29447168
26193269
30285631
31404956
30123102
29712833
31221078
30652280
29651660
24319376
31747926
25804818
31559749
23913002
28640834
28855520
28570677
30669982
29417346
30078233
30957149
31294833
28540554
29704352
32005385
31665761
29188401
29518035
31812009
30938421
31558740
28177408
31125059
31195663
27607023
31861556
26624226
30945676
30476702
28953916
29608895
30941464
30381841
30578709
31666006
31734522
29194659
31721818
26398790
29570668
31134348
27442592
27908260
27208977
29415202
26934874
28936981
28241800
25935420
30977137
31476528
25969553
26941218
25604532
29053716
26475188
30255565
30020522
29590108
29309420
29040752
31144112
30216466
28910323
26458744
29631006
26951633
27215438
29231846
30180952
23040678
27644410
26204390
26906624
30791662
26733420
28549198
31406137
23702083
21752030
31091337
31416414
28119334
31623784
29185475
30824044
30627770
31343741
27353051
28893196
31257201
27964835
28718511
28830103
25692547
27640194
28493955
29934376
28710562
27129581
30150630
26228739
31487424
23766697
22364373
26637362
29402924
27468994
27546315
26182834
27174702
26953271
29027842
24695726
27352311
31151078
27388154
27095276
20002333
26410535
31706221
26795343
27869212
29016956
31443483
27808360
25118806
28543596
25153119
28184867
26172270
25924061
28552570
25072186
28700592
31587275
25314587
20040064
30629305
27031331
30098366
22154468
28811563
26900681
26986930
26650836
27491393
26618613
27746300
25695335
23749097
28816619
25865630
23162116
25657343
29273003
27855226
23231763
27527518
27030016
25940960
22181694
28244201
26744996
27844102
26383697
28167030
23857471
25234727
25666276
22948308
28128318
26715311
22118618
24130868
25763614
25539911
26418632
24062085
26417018
27161830
25128645
26230273
30940337
24913125
24085426
25004790
23145152
19914371
25236158
23231480
23867600
25385768
25764437
28830364
22348023
25576005
24813728
25546584
23644883
23472143
32105358
25192890
26055625
25350113
24561249
32150870
21132431
26959651
26546319
28552955
21679158
24661137
25120219
32054459
27638479
20467880
27009386
22220579
21849817
26350634
24606771
25496221
23734749
25721473
25693492
26666551
31574532
27814568
19930132
19546148
20642740
31954281
24179129
21437581
22662107
32081259
20846898
32320942
23949687
22109847
26268547
24465967
25428981
32045562
23455709
26067440
26061996
23698015
23503758
21509473
24093224
23036198
24350984
19412828
23415326
23442150
20807999
32325609
19716744
21406116
24641694
27425246
24992888
22799462
25108399
23435173
19545420
24398893
23797994
21296583
24357347
23189148
25017054
24006421
25275443
19561048
20862491
23400831
23767915
22078375
32422512
25545786
24391737
24399177
23012350
25135325
23807313
26756791
26369665
26242449
22511801
26423958
32271855
23404903
23838956
24224045
25334062
25939503
21609476
24086146
22008187
20616154
24322442
32804948
23605194
19582226
23299334
25393623
24817160
21656015
20643807
32169794
20100696
25261532
25174417
23615900
24244460
20119627
23719892
25283804
22033904
24985975
22130861
20444191
32246464
21635942
24282068
22772725
19781008
25877816
24059455
22771912
19220786
25030652
23538843
18777179
22082019
23084322
22900018
23980654
24704987
20172618
24912738
25302464
21647638
22127738
20809928
25511667
22888963
19149734
19018570
20105335
18922162
23894539
22433076
21988523
20567981
22102215
32005165
18956212
19638676
21988641
24638821
31980835
24816929
32031318
19669593
22721448
21725029
24076355
22016430
18931976
24531138
19529821
22667112
21513527
24773781
20144227
23651119
20406784
22385556
22193338
19888455
19090135
20233336
22136218
21421412
19224247
19730734
24078217
21332845
20490502
22817330
25071221
22251627
22313226
19135985
18813955
21457805
21316798
18721784
19025623
19529831
20230648
20533197
19758430
21323928
19161942
22911265
20507936
20960221
19054353
23094910
24377135
19309461
19957440
18433415
19953304
18936880
20927713
21208938
20931837
20131066
20487379
19152115
20723133
22609457
18349516
16469722
18797175
16416962
28826479
25636202
31671113
22348040
29847587
26320239
31712622
26507552
32019031
21955397
27683092
21073700
23541511
24333268
22118559
31917885
24682459
24521401
29246190
26458893
18818929
26560113
32000662
23455692
26261267
23079765
26478518
22833170
31439717
30824052
29534548
23090142
25583362
22067051
22526427
31881689
21415892
28181537
22301960
25158254
29042616
24093718
24393105
28339719
31738789
21209856
21684035
28008082
30971212
31493059
30039430
24783782
19866433
29576075
23658369
28651543
30949664
27447461
18817859
24473898
26535682
21151911
32472480
23148036
23443681
25218132
22018045
27325900
24987730
29359344
32019503
32776991
26093896
19716198
30126242
26573680
30972883
27233639
23620302
28829683
29440346
22078383
28703378
22415104
28046012
21505831
29924833
21502188
22794914
23868569
29334890
31728530
31575388
28913792
22984543
20495351
26160315
22226709
31349783
23051937
26890603
29425824
29416051
27029818
25809153
21527628
28939837
20525001
24489802
25480323
31288392
25076035
29907303
28314795
20729483
31894455
19847887
28464065
27824922
24655390
29876646
23048128
19277718
20087595
22382993
30999131
31174465
23783278
25588806
28647905
22543414
29939987
31241131
24868035
21472467
27832344
23333328
26245532
31125390
28424372
22902206
23387304
28711666
27646344
31568958
22210598
21556756
23792826
26857916
22131157
24283512
22696006
19912666
22510066
23165101
32058898
29754472
24379380
23297047
29470695
28167026
27453463
32291011
31324929
23381133
20875057
25547914
28821876
26329877
28389925
27193100
29177514
27215938
25063324
23194183
19344351
28134322
31018553
28776695
30866813
28241862
29378511
23083401
25445270
19732348
30925673
24804248
32866164
28275853
25496091
24036432
31586722
27503217
30872806
24004533
26577407
26103151
21274588
32035249
32112957
29432551
30712129
24247850
21931776
18800227
23816928
25184213
23364940
28068641
26216304
24638819
21327157
20931381
29970817
25974367
24727789
31482250
26646381
31771205
23462639
31811189
32179173
29856862
32946440
31234595
24244664
21966459
21719639
22099518
21671068
24241624
27599367
31619699
21455815
25618423
32220847
28640975
28981779
27871001
27992471
23351381
27706655
27721134
20976458
22160463
28182297
21193345
21912210
15969014
27085597
27319052
31510928
20574667
25175069
22882870
31842360
30726239
31376807
24474809
29885509
25541723
30904979
27471796
20133880
33016597
24801366
19671096
31298414
24272249
23286013
30783953
23109182
25804819
16468344
19838809
27933379
26154763
19776160
30987595
21188619
21576192
26179072
28303406
25767913
28249019
30517137
25828772
23435089
22519646
25893867
26867628
23944872
31472076
32464438
25893685
31252573
29906271
26011089
30289381
31568959
24566693
19002660
22472016
27861954
31271689
20206537
32018064
29685101
24642880
24992887
31172662
29673612
31779286
25888598
27844101
30409967
23667465
22433075
23015761
31612812
31279796
26898554
32171232
25539982
19584119
20333536
31779898
29614319
31362376
26667133
29921939
31337336
26038306
19059788
19235272
21564545
26947924
30555091
31986481
28281578
27553065
28536792
24801596
24748053
26444539
24656336
22629208
28064119
22531933
22792223
27314499
31968543
27503092
28723926
21811828
30868163
28771553
22555403
19751706
28125637
27463237
27215785
26842940
25299612
28051176
31286320
25274312
19834655
22660630
23849110
28033539
27337541
25489951
28916800
30684038
25489849
27111837
27504627
29889864
22747754
27709374
28419345
25604990
19402879
27068847
26297452
26820136
23753177
29098789
24811679
28233854
31652768
26706071
28982538
22678667
19752887
22569964
19032934
30238422
26083807
26025543
32229406
27542160
29020945
30894225
29193733
30727813
21561798
20087656
32033046
32305820
28985426
20360355
30336380
28831155
26923071
22047206
31227734
20681973
29374206
26520913
31948071
25931321
30901839
27443644
21838776
29096085
30840709
28703589
30209586
30951096
30121873
30738218
23593126
23936140
32005402
24293150
28869785
24218327
27738714
28107426
23045610
31426752
31017672
30223789
30765803
24337866
25428615
29366830
26991441
31100705
26134138
30523281
26476792
23122336
24189206
30679609
26125930
21923928
28098349
30371871
30875867
25286109
27832102
25333723
26305687
25946429
22415631
19381641
29331610
29899256
30267030
22794917
25130909
19701685
29434236
30301220
24748414
28733678
23717458
20723623
23313219
32012796
31284569
25657344
21617381
30189657
19363683
29489914
30511183
20454772
31382811
20049613
29949622
28751243
28779288
19453503
24460890
19052255
24194857
19906836
19148673
31395652
23178915
23425100
31930666
30584948
21476089
22564282
31212102
25285889
23420309
23301042
30212759
32028614
25431405
23356734
21058928
30808876
23577102
27164447
25422934
16722342
31138186
26314767
19239124
28922767
21901277
23669573
24916767
25537300
29802991
22920996
25740370
30396236
24157208
23840708
23453780
30514439
32097847
19453505
29223878
25874657
24614245
26818269
19017115
32299052
22562393
31948113
30798172
26777777
24265778
19263233
23456334
20377692
23774379
25793865
23292790
23893304
24475748
26448643
19061521
19674339
30919902
26395398
20439779
32172495
22516821
25596127
25933420
21115661
30801865
31923721
29075873
29426828
22038091
32445476
29946904
21647605
23116672
28204526
28466470
26569231
23509774
27813556
24161757
27593474
25414087
20871100
30068540
31935846
32203884
28780355
29496777
27095404
24698809
24162335
29777132
25079970
28985414
23046089
22160567
25385766
29932074
29424269
19968827
31717503
22257748
25740372
26440076
28460279
25192670
28182328
27026054
24948680
30716444
22930734
31077401
26057839
27068810
27524243
24583344
30699185
26867630
27550641
23025749
26338450
23570526
30814574
30359793
18464600
24609499
27499088
18700826
32350607
21184050
27616639
23368984
29796948
22808152
32327609
23757363
29080251
26808306
22164299
23583937
17764573
24888752
30769841
31071165
24146023
27245028
27194706
23151346
30248119
23547968
21866346
23810914
30143992
29589939
26350963
24475115
28482333
27507681
31775269
23112280
26872943
26335528
22038370
30189594
29329517
23881361
24880908
23562798
23660286
28831141
28956210
28545114
30576803
28541580
21762498
29720087
19429605
25557253
30200561
31098806
22451089
26861168
20372947
25702698
31248195
25218040
31284139
30639313
20819788
27829056
24020723
25205575
27016184
26537110
27308855
25306528
28388505
28346448
23807320
25149469
23135854
28226194
28686465
21615673
27641356
30466574
27593472
26966988
26704366
30132153
27892643
30727949
31600710
26879345
22645020
25124318
21923759
26172952
22207172
31711215
28888162
29652907
24364212
20387044
27525914
31654214
24792388
27565983
32081255
27589953
28409321
26582510
23056196
22207180
29116579
30471727
25804816
32653482
27935412
19566704
23522385
23639099
26010543
31160625
25644024
28855118
26078720
31200084
31704591
26832070
30187414
18679687
23483290
28976303
22923680
31717328
22037288
27730410
30446876
23077204
24919981
31338767
20335401
21590508
27085599
30400808
23686450
32545957
28582694
20398238
25802007
19330365
27830987
30520727
27604581
27576435
31606716
25119646
29097722
19947979
22646706
26123791
24736242
30781862
30200246
27382137
20549349
29927997
29574592
28895167
31628708
27311738
32069300
30889404
28645264
30891909
27207260
29016915
31647996
30099549
31158327
26877151
16387885
26387805
29433625
26674966
31477771
31075717
26630288
24223111
21547435
25404140
25783413
20807374
24716850
26562293
22069724
18825384
24695493
30126870
19203944
20490504
26220950
21973280
25809150
25405758
19322663
28646139
26044122
25835290
23717523
30227384
25173686
28364804
31374851
24408129
30842265
26410829
23104474
23703395
22644439
32192425
30837371
26092364
30609831
22424186
19723246
30694457
20553421
27002402
24992889
26169196
23275191
25604693
26733237
25430883
18332009
22268147
21325898
21958707
27697148
30146417
25393112
25448235
22466450
26599013
31454709
17452795
29565279
28575745
27040682
26463995
30099610
26431530
22350156
24928551
27088086
30380988
31621913
24214268
26759178
23755095
32375634
28155114
29478138
21030505
24177011
32145581
30548716
29391403
15190366
19132376
27490537
26689769
24291188
25690040
30872683
26825039
23399101
28352121
20206599
29023004
28754592
26047696
24604734
25436223
22751653
28378935
22539184
30496539
24667379
26733691
27845851
20364325
30452688
26601981
21585388
25040333
30315246
24755076
28527336
30055799
26277248
27174156
32383121
18804072
28619070
19005655
25847193
31619629
30826442
30388157
26006072
26512059
30013000
21457711
30715761
24682461
26681214
27718117
23000164
25250511
21172816
26585228
24390238
23227166
29637575
31382384
19616421
30428929
30113022
27155357
23196831
28834352
20077023
24080396
26847575
23651908
31023218
31931629
22619309
9684369
24240518
31846477
19744745
28730636
27479938
25149149
26345744
19017111
29347912
21974688
28338908
31242187
21398568
32430635
24270688
20952421
32253631
24068300
27501838
27801967
22033903
26142104
31121945
31604421
17928100
28088182
23192746
18688729
23167462
23452019
24941745
26441057
21447997
26394867
27748408
21193578
31979344
30955214
24929777
29771294
27544199
23372737
24909687
27072809
23388059
24205149
22105026
26833264
27992306
22829319
21471120
24143807
26930570
31083611
25467808
22882529
22937645
30285298
20172620
30769913
28420173
25647426
28687067
29417232
29216330
30445554
31551523
32085397
32139708
27097028
30707443
32497140
26092253
22696141
30099612
31619177
20181664
26674968
27323025
20796214
21969385
25466514
20392519
27073898
24964784
24668632
26584560
26634495
23415322
21331631
24315817
30032264
29529054
32155447
29196985
30953477
22516817
29794162
27604707
25348703
26616472
24454749
26788738
30531728
27194741
30650531
22809508
31611386
20566372
25416131
25596927
19734139
22996258
19415285
20217124
27380174
29751673
20111677
29175388
20595206
27716126
23537705
27717465
18804076
27209581
22223808
22047139
25636232
28175921
25225478
29162892
28096765
29870879
22112171
27323012
23141673
25542897
29030640
31906215
24127586
22610347
23129215
32075313
30292980
20129399
25555382
22551450
24725365
27012548
21459832
29950274
31465430
31703428
30241414
31076861
32155727
28831522
24096889
24438332
26590998
28887353
23874992
28615505
31349781
29320982
27388340
29045473
30781418
26475192
25617320
26335593
25701792
18980743
27723504
21818852
24610749
25730064
28233777
30071503
31072449
19902215
22569921
21641561
21389632
30712230
31724179
26944555
26397813
27001437
29192193
30999852
25756609
23918430
20361337
26214481
31852429
21486303
24916310
28793327
22383628
26039925
19865535
25302337
29425813
27294277
28419172
25124075
25875731
28964253
31276526
29897926
20619485
27716937
31652373
27443220
33001712
25500453
22396800
32502715
28534253
21439417
33094397
31412764
22847334
21041371
29576066
28321653
22247272
26536863
26400357
19602544
27721135
30910907
24054754
24285755
31202194
28131342
26406473
26141043
25027834
24938613
31032353
23039848
23581509
28861611
21288194
28686596
29165704
17149652
28747711
23386684
19481835
29891874
21106056
25752288
29465802
26176898
27083416
23494614
31481202
28241796
19712065
30671479
22242864
24102453
30747272
22633820
28576847
29111595
28168515
28445484
31989373
23889779
26576489
21698458
25318938
31409044
29133823
21209969
24198318
19653105
31898148
25800365
23341362
32155784
29762546
21330785
24737991
27717468
22562548
23979536
23152961
23915077
23942844
31468258
22983672
22476619
29296019
25187181
24618117
31267122
23667521
27345721
23962802
25533478
28275855
23602105
27722804
23672620
23111158
27302009
30245343
26566839
31455231
32621165
25474740
28929574
29538660
23107917
30578854
29974467
21411180
20377698
26368017
28340002
18706721
31841963
24337188
24309107
30507957
24666827
20202995
24361507
20701692
32171257
31638916
30191466
22138855
32088579
32446917
30620086
32078897
31947822
22772750
24130197
26305264
24085307
30623555
31320697
24814155
26825291
31035558
24974883
19936810
27588421
31181633
25703105
28586434
22080421
31479515
31204698
28818377
31291312
32780764
23942841
30735543
25371507
25064597
31809981
19129162
22561114
24779858
18930563
28587994
23223881
23524662
26116025
21365356
26449881
29024118
25912720
23044418
31982861
24738645
22038450
29870563
21778184
26404728
19495853
29558898
21681490
28039925
23583936
20129700
26535668
24920452
30989905
26158616
29687169
27498495
20128882
24128296
24474810
31318935
23604203
21679437
25464361
26752435
28790447
20142425
23658783
32454180
23660834
27316630
31332521
27245096
21986537
27085481
20423938
23682116
28878329
25356551
20471134
25623724
21575189
22794915
31238869
25619813
23832569
28742868
21399993
26263687
30597317
28435105
29966243
25975834
25502480
28941083
27592839
25398215
31292649
27323089
21746919
23283739
29772750
31671135
28190292
31183509
29502259
22301130
21178395
27513726
30919132
23881327
21040302
28461401
24088139
28913795
28474118
29632386
30047814
23675526
25471470
21502661
30730020
20227134
26772909
26646286
26138664
20668063
25691002
23037947
32060321
31212812
30577128
30593916
26270661
26264965
27880018
28899960
24182190
25716094
19682285
30303953
31477017
31818042
26237514
29223330
25487628
27888122
31015091
23053973
22366304
26139825
24970488
30641216
28984911
22198727
24268169
32075333
26899912
24197564
26082400
28419961
31888211
28338719
12897256
19652975
24773321
21293909
20088904
22367692
30568257
30375990
26560029
25401749
28559135
30857310
23732674
26287163
25080211
26175353
20492547
27754576
26082265
28155667
30823997
31847498
30587818
27195813
32217727
23719890
27713524
[truncated: 5,732 more rows]
