# Supplementary material for: Meta-Analysis Reveals Challenges and Gaps for Genome-to-Phenome Research Underpinning Plant Drought Response
Source: Int J Mol Sci. 2022 Oct 14;23(20):12297. doi: 10.3390/ijms232012297 (PMC9602940; doi:10.3390/ijms232012297)
Supplement: Supplementary file 1 [file ijms-23-12297-s001.zip › Table_S2.csv]

Table S2. Full list of taxa and data (number of genes and phenotypes associated with each taxon, number of abstracts in the taxon was identified, human use categories, and whether the taxon has a genome assembly available) identified in the abstracts.
Family	Species	NumGenes	NumPhenotypes	Consensus Abstracts	Total Abstracts	Kew.Checklist	Genome_Level
Pinaceae	Abies alba	2	4	2	2	MA;ME	NA
Fabaceae	Acacia ligulata	3	2	1	1	AF;EU;FU;HF;IF;ME;SU	NA
Fabaceae	Acacia saligna				1	AF;EU;FU;HF;MA	NA
Sapindaceae	Acer platanoides				1	EU;MA;ME	NA
Actinidiaceae	Actinidia chinensis	4	12	2	3	GS;HF;MA;ME	1
Ranunculaceae	Adonis amurensis	2	4	1	1	EU;ME	NA
Primulaceae	Aegiceras corniculatum	2	5	1	2	EU;FU;HF;IF;MA;ME;PO;SU	NA
Poaceae	Aegilops columnaris				1	GS;CWR	NA
Poaceae	Aegilops longissima	1	5	1	1	GS;CWR	NA
Poaceae	Aegilops speltoides	4	6	2	4	AF;GS:CWR	NA
Poaceae	Aegilops tauschii	18	25	18	25	GS;CWR	1
Poaceae	Aeluropus littoralis	13	15	4	6	NA	NA
Amaryllidaceae	Agapanthus praecox				1	EU;ME	NA
Asteraceae	Ageratum houstonianum	1	7	1	1	EU;MA;ME	NA
Poaceae	Agropyron cristatum	1	1	1	1	AF;EU;GS;CWR	NA
Poaceae	Agropyron mongolicum	37	37		1	AF;EU;GS;CWR	NA
Poaceae	Agrostis stolonifera			14	16	EU	NA
Fabaceae	Alhagi sparsifolia	1	5	1	4	NA	NA
Amaryllidaceae	Allium cepa	5	13	3	5	AF;EU;GS;HF;MA;ME;PO;SU;CWR	NA
Amaryllidaceae	Allium sativum				1	AF;EU;GS;HF;MA;ME;PO;CWR	1
Betulaceae	Alnus glutinosa				1	EU;FU;HF;MA;ME	NA
Asphodelaceae	Aloe vera	3	2	1	1	EU;GS;HF;MA;ME;PO;SU	NA
Amaranthaceae	Alternanthera philoxeroides	2	7	2	2	AF;EU;ME	NA
Brassicaceae	Alyssum obovatum				1	NA	NA
Brassicaceae	Alyssum serpyllifolium	1	11	1	1	NA	NA
Amaranthaceae	Amaranthus caudatus	1	5	1	1	AF;EU;GS;HF;MA;ME;SU	NA
Amaranthaceae	Amaranthus hypochondriacus	5	19	3	3	AF;EU;GS;HF;MA;ME;PO	1
Amaranthaceae	Amaranthus tricolor	3	9	1	1	EU;GS;HF;MA;ME;PO;SU	NA
Fabaceae	Ammopiptanthus nanus	11	7	3	4	EU	NA
Zingiberaceae	Amomum villosum	2	6	1	1	NA	NA
Chenopodiaceae	Anabasis articulata	2	1	1	1	AF;MA;ME;PO	NA
Bromeliaceae	Ananas comosus	4	2	2	2	EU;GS;HF;MA;CWR	1
Poaceae	Andropogon gerardii	2	4	1	4	AF;EU;ME	NA
Asteraceae	Antennaria dioica				1	EU;ME	NA
Araceae	Anthurium andraeanum	1	3	1	1	EU;ME;PO	NA
Plantaginaceae	Antirrhinum majus	1	2	1	1	EU;GS;ME	NA
Apiaceae	Apium graveolens	5	7	2	2	AF;GS;HF;MA;ME;PO	1
Brassicaceae	Arabidopsis halleri				2	NA	NA
Brassicaceae	Arabidopsis lyrata	3	3	1	4	NA	NA
Brassicaceae	Arabidopsis thaliana	774	112	641	869	GS;ME;CWR	1
Fabaceae	Arachis diogoi	2	11	1	1	GS;CWR	NA
Fabaceae	Arachis duranensis	14	14	7	11	GS;CWR	1
Fabaceae	Arachis hypogaea	59	53	33	44	AF;EU;FU;GS;HF;IF;MA;ME;PO;SU;CWR	1
Fabaceae	Arachis hypogea				1	AF;EU;FU;GS;HF;IF;MA;ME;PO;SU;CWR	NA
Fabaceae	Arachis ipaensis	6	5	3	3	GS;CWR	1
Fabaceae	Arachis magna	3	4	1	1	NA	NA
Fabaceae	Arachis pusilla	1	1	1	1	GS;CWR	NA
Fabaceae	Arachis stenosperma	3	2	1	2	GS;CWR	1
Elaeocarpaceae	Aristotelia chilensis	3	11	2	2	EU;MA;ME	NA
Plumbaginaceae	Armeria maritima				1	EU;ME	NA
Asteraceae	Artemisia annua	20	17	5	8	EU;HF;MA;ME	NA
Asteraceae	Artemisia desertorum				1	NA	NA
Asteraceae	Artemisia sphaerocephala				1	EU;FU;ME	NA
Moraceae	Artocarpus altilis	1	5	1	1	GS;CWR	NA
Poaceae	Arundo donax	4	9	1	1	AF;EU;FU;HF;MA;ME;SU	NA
Chenopodiaceae	Atriplex canescens	5	8	2	4	AF;EU;ME;PO	NA
Chenopodiaceae	Atriplex centralasiatica	1	5	1	1	NA	NA
Chenopodiaceae	Atriplex hortensis	8	17	4	4	GS;HF;ME	NA
Poaceae	Avena sativa	5	11	2	2	AF;EU;GS;HF;MA;ME;PO;CWR	NA
Acanthaceae	Avicennia marina	6	10	3	5	AF;EU;FU;HF;IF;MA;ME;SU	1
Chenopodiaceae	Beta vulgaris	9	15	5	9	AF;EU;FU;GS;HF;MA;ME;PO;CWR	1
Betulaceae	Betula pendula	1	4	1	1	EU;HF;MA;ME	NA
Fabaceae	Bituminaria bituminosa	7	4	2	4	AF;EU;ME	NA
Gesneriaceae	Boea clarkeana	3	4	1	1	NA	NA
Gesneriaceae	Boea hygrometrica	14	6	4	5	NA	NA
Brassicaceae	Boechera holboellii	2	7	1	1	ME	NA
Brassicaceae	Boechera stricta				2	ME	NA
Urticaceae	Boehmeria nivea	7	4	2	2	AF;HF;MA;ME;PO	NA
Malvaceae	Bombax ceiba	2	7	1	1	AF;EU;FU;GS;HF;IF;MA;ME;SU	NA
Poaceae	Bothriochloa ischaemum				1	AF;EU	NA
Poaceae	Bouteloua dactyloides	1	2	1	1	AF;EU;ME	NA
Poaceae	Bouteloua gracilis	1	3	1	2	ME	NA
Poaceae	Brachypodium distachyon	66	58	44	56	NA	1
Brassicaceae	Brassica carinata	4	3	1	1	AF;FU;GS;HF;ME;CWR	NA
Brassicaceae	Brassica juncea	13	28	8	9	AF;EU;FU;GS;HF;ME;ME;PO;SU;CWR	1
Brassicaceae	Brassica napus	123	63	60	71	AF;EU;FU;GS;HF;MA;ME;PO;CWR	1
Brassicaceae	Brassica oleracea	48	38	18	21	AF;EU;GS;HF;MA;ME;PO;CWR	1
Brassicaceae	Brassica rapa	81	45	41	51	AF;EU;FU;GS;HF;MA;ME;PO;CWR	1
Poaceae	Bromus inermis	2	8	2	3	AF;EU;ME;PO	NA
Poaceae	Bromus riparius				1	AF	NA
Moraceae	Broussonetia papyrifera	4	10	4	4	AF;EU;FU;HF;IF;MA;ME;SU	NA
Rhizophoraceae	Bruguiera gymnorhiza	2	1	1	2	AF;EU;FU;HF;IF;MA;ME;SU	NA
Apiaceae	Bupleurum chinense	4	3	1	1	DC	NA
Fabaceae	Butea monosperma	1	1	1	1	AF;EU;FU;HF;IF;MA;ME;PO	NA
Fabaceae	Cajanus cajan	15	25	11	12	AF;EU;FU;GS;HF;IF;MA;ME;PO;CWR	1
Fabaceae	Cajanus scarabaeoides				1	EU;GS;HF;ME;CWR	NA
Apocynaceae	Calotropis procera	12	17	6	6	AF;EU;FU;HF;MA;ME;PO;SU	NA
Brassicaceae	Camelina sativa	19	24	9	9	AF;FU;GS;HF;MA;ME;CWR	1
Theaceae	Camellia oleifera	3	4	1	1	HF;MA;ME	NA
Theaceae	Camellia sinensis	42	48	25	32	GS;CWR	1
Nyssaceae	Camptotheca acuminata	1	4	1	1	EU;ME	NA
Cannabaceae	Cannabis sativa	5	10	2	2	AF;FU;HF;MA;ME;PO;SU	1
Capparaceae	Capparis spinosa	1	5	1	1	AF;EU;GS;HF;MA;ME	NA
Brassicaceae	Capsella bursa-pastoris	2	5	1	1	NA	NA
Solanaceae	Capsicum annuum	68	52	46	50	EU;GS;HF;MA;ME;PO;SU;CWR	1
Solanaceae	Capsicum annuum var. glabriusculum	3	4	1	1	EU;HF;MA;ME;PO	NA
Solanaceae	Capsicum chinense	1	5	1	1	GS;HF;ME;CWR	1
Fabaceae	Caragana jubata	2	5	2	2	EU;IF	NA
Fabaceae	Caragana korshinskii	13	21	6	7	NA	NA
Fabaceae	Caragana microphylla	6	2	1	1	NA	NA
Fabaceae	Caragana rosea	2	1	1	1	NA	NA
Cyperaceae	Carex muskingumensis	2	2	1	1	EU	NA
Caricaceae	Carica papaya	7	9	3	3	AF;EU;GS;HF;IF;MA;ME;PO;SU;CWR	1
Asteraceae	Carthamus tinctorius	2	7	2	2	AF;EU;GS;HF;IF;MA;ME;CWR	NA
Juglandaceae	Carya cathayensis	7	17	2	2	GS;HF	NA
Fagaceae	Castanea sativa	1	4	1	1	GS;HF;MA;ME	NA
Fabaceae	Castanospermum australe	3	5	1	1	HF;MA;ME;PO	NA
Bignoniaceae	Catalpa bungei	1	11	1	1	EU;ME	NA
Bignoniaceae	Catalpa fargesii	4	4	1	1	NA	NA
Apocynaceae	Catharanthus roseus	7	12	3	3	AF;EU;GS;HF;MA;ME;PO	NA
Pinaceae	Cedrus libani	4	5	1	1	MA;ME	NA
Poaceae	Cenchrus americanus				1	AF;HF;ME	1
Poaceae	Cenchrus ciliaris	1	12	1	2	AF;EU;GS;HF;MA;ME;PO	NA
Pteridaceae	Ceratopteris richardii	2	6	1	1	NA	NA
Chenopodiaceae	Chenopodium quinoa	8	15	3	5	GS;HF;ME;CWR	NA
Chenopodiaceae	Chenopodium rubrum	1	13	1	1	NA	NA
Calycanthaceae	Chimonanthus praecox	3	7	1	1	EU;MA;ME	NA
Brassicaceae	Chorispora bungeana	6	13	3	3	NA	NA
Asteraceae	Chrysanthemum dichrum	6	11	2	2	NA	NA
Asteraceae	Chrysanthemum grandiflorum	5	7	1	1	NA	NA
Asteraceae	Chrysanthemum lavandulifolium	9	19	4	4	ME	NA
Asteraceae	Chrysanthemum X morifolium	28	26	6	6	ME	NA
Asteraceae	Chrysolaena obovata	1	10	1	1	NA	NA
Fabaceae	Cicer arietinum	40	53	28	37	AF;GS;HF;MA;ME;CWR	1
Fabaceae	Cicer microphyllum				1	GS;ME	NA
Fabaceae	Cicer pinnatifidum				1	GS;CWR	NA
Fabaceae	Cicer reticulatum				1	GS;CWR	1
Asteraceae	Cichorium intybus	2	4	1	1	AF;GS;HF;ME;PO;SU	NA
Cistaceae	Cistus albidus	2	6	1	1	EU;IF;MA	NA
Cistaceae	Cistus incanus	10	6	2	2	MA;ME	NA
Cistaceae	Cistus ladanifer	1	1	1	1	EU;GS;HF:IF;MA;ME	NA
Cucurbitaceae	Citrullus colocynthis	9	12	4	4	AF;EU;FU;GS:HF:MA;ME;PO;SU;CWR	NA
Cucurbitaceae	Citrullus lanatus	5	9	3	8	AF;EU;FU;GS;HF:MA;ME;PO;SU;CWR	1
Rutaceae	Citrus maxima	4	1	1	1	NA	1
Rutaceae	Citrus reshni	2	11	1	1	NA	NA
Rutaceae	Citrus reticulata	2	4	1	1	NA	NA
Rutaceae	Citrus X limon	1	5	1	2	AF;EU;FU;GS;HF;MA;ME	NA
Poaceae	Cleistogenes songorica	16	21	8	8	NA	NA
Clusiaceae	Clusia minor	3	6	1	1	MA;ME	NA
Clusiaceae	Clusia rosea	3	6	1	1	EU;MA;ME	NA
Campanulaceae	Codonopsis lanceolata	1	6	1	1	EU;HF;ME	NA
Rubiaceae	Coffea arabica	16	28	7	7	AF;EU;GS;HF;IF;MA;ME;SU;CWR	1
Rubiaceae	Coffea canephora	7	27	7	8	AF;EU;GS;HF:ME;SU;CWR	1
Caryophyllaceae	Colobanthus quitensis	4	5	1	1	NA	NA
Commelinaceae	Commelina benghalensis	1	11	1	1	AF;GS;HF;MA;ME;PO	NA
Asteraceae	Conyza canadensis	1	6	1	1	FU;HF;MA;ME;PO	NA
Ranunculaceae	Coptis chinensis	2	3	1	1	ME	1
Malvaceae	Corchorus capsularis	6	10	2	2	EU;GS;HF;MA;ME;PO	NA
Malvaceae	Corchorus olitorius	2	5	1	1	AF;EU;GS;HF;MA;ME;PO	NA
Apiaceae	Coriandrum sativum	1	8	1	1	AF;EU;GS;HF;MA;ME;SU	NA
Betulaceae	Corylus heterophylla	1	6	1	1	EU;GS;HF;CWR	NA
Linderniaceae	Craterostigma plantagineum	14	28	10	13	EU;ME	NA
Fabaceae	Cratylia argentea				1	NA	NA
Cupressaceae	Cryptomeria japonica	1	3	1	2	EU;MA;ME	NA
Cucurbitaceae	Cucumis melo	3	14	1	4	AF;EU;FU;GS;HF;IF;MA;ME;PO;SU;CWR	1
Cucurbitaceae	Cucumis sativus	29	34	12	16	AF;GS;HF;MA;ME;PO;CWR	1
Cucurbitaceae	Cucurbita ficifolia	3	4	1	1	AF;EU;GS;HF;ME;CWR	NA
Cucurbitaceae	Cucurbita maxima	2	1	1	1	AF;EU;GS:HF;IF;MA;ME;SU;CWR	NA
Cucurbitaceae	Cucurbita moschata	2	6	1	1	AF;EU;GS:HF;ME;CWR	NA
Cucurbitaceae	Cucurbita pepo	4	1	1	1	AF;EU;FU:GS;HF;IF;MA:ME;PO;CWR	1
Cupressaceae	Cunninghamia lanceolata				1	EU;MA;ME	NA
Zingiberaceae	Curcuma longa	1	7	1	1	AF;GS;HF;MA;ME;PO;SU	NA
Fabaceae	Cyamopsis tetragonoloba	1	2	1	2	AF;EU;GS:HF;MA;ME	NA
Orchidaceae	Cymbidium sinense	1	8	1	1	ME	NA
Orchidaceae	Cymbidium tracyanum	1	8	1	1	NA	NA
Apocynaceae	Cynanchum thesioides	12	2	1	1	NA	NA
Asteraceae	Cynara cardunculus	4	24	2	2	AF;EU;GS:HF;MA;ME;CWR	1
Poaceae	Cynodon dactylon	22	24	8	8	AF;EU;HF;MA;ME;PO;SU	NA
Poaceae	Cynodon transvaalensis	9	12	2	2	EU;GS	NA
Cyperaceae	Cyperus esculentus				1	AF;EU;FU;GS;HF;IF:MA;ME;SU	NA
Poaceae	Dactylis glomerata	6	5	3	3	AF;EU;ME;PO	NA
Poaceae	Dasypyrum villosum				1	AF;GS	NA
Solanaceae	Datura stramonium	4	8	2	2	EU;FU;HF;MA;ME;PO;SU	NA
Apiaceae	Daucus carota	9	10	3	4	AF;GS:HF;MA;ME;PO;CWR	1
Asteraceae	Dendranthema indicum	6	6	1	1	EU;GS;MA;ME	NA
Orchidaceae	Dendrobium catenatum	9	11	4	5	NA	NA
Poaceae	Deschampsia antarctica	5	8	2	2	NA	NA
Caryophyllaceae	Dianthus caryophyllus	5	8	1	1	EU;GS;MA;ME	NA
Caryophyllaceae	Dianthus spiculifolius	4	11	2	2	NA	NA
Poaceae	Dichanthium annulatum	3	2	1	1	AF;EU;GS;HF;MA;ME	NA
Plantaginaceae	Digitalis nervosa				1	ME	NA
Sapindaceae	Dimocarpus longan	6	11	2	2	EU;GS;HF:MA;ME;PO;SU	NA
Dioscoreaceae	Dioscorea alata	3	8	1	1	AF;EU;GS;HF;MA;ME;PO;SU;CWR	NA
Ebenaceae	Diospyros kaki	9	17	1	1	GS;HF;MA;ME;PO;SU	NA
Phrymaceae	Diplacus aurantiacus ssp. aurantiacus				1	NA	NA
Cleomaceae	Dipterygium glaucum	1	1	1	1	NA	NA
Brassicaceae	Draba nivalis	1	3	1	1	NA	NA
Hyacinthaceae	Drimia maritima	3	6	1	1	AF;EU;HF;MA;ME;PO;SU	NA
Droseraceae	Drosera capensis				1	NA	NA
Polygonaceae	Duma florulenta	2	2	1	1	NA	NA
Arecaceae	Elaeis guineensis	3	8	2	4	AF;EU;FU;GS;HF;MA;ME;PO;SU;CWR	1
Poaceae	Eleusine coracana	11	19	5	9	AF;EU;GS;HF;MA;ME;SU;CWR	NA
Poaceae	Elymus nutans	5	2	1	1	AF;GS;CWR	NA
Poaceae	Elymus sibiricus	5	2	1	3	GS;CWR	NA
Musaceae	Ensete ventricosum				2	AF;EU;GS:HF;IF;MA;ME;CWR	NA
Poaceae	Eragrostis curvula				2	AF;EU;GS;HF;ME;CWR	1
Poaceae	Eragrostis nindensis				1	AF;EU;GS;HF;MA;ME	NA
Poaceae	Eragrostis tef	2	11	1	3	AF;EU;GS;HF;MA;ME;SU	NA
Fabaceae	Eremosparton songoricum	3	10	2	2	NA	NA
Rosaceae	Eriobotrya japonica	2	6	1	2	AF;EU;FU;GS;HF;MA;ME;PO;SU;CWR	NA
Brassicaceae	Eruca vesicaria	6	6	2	2	AF;FU;GS:HF;MA;ME;PO;CWR	NA
Fabaceae	Erythrophleum ivorense	1	3	1	1	FU;HF;IF;MA;ME;PO;SU	NA
Myrtaceae	Eucalyptus camaldulensis	6	12	3	3	AF;EU;FU;HF;IF:MA;ME	1
Myrtaceae	Eucalyptus globulus	9	28	6	8	AF;EU;FU;HF:IF;MA;ME;PO;SU	1
Myrtaceae	Eucalyptus grandis	12	19	6	8	EU;FU;HF;IF;MA;ME	NA
Myrtaceae	Eucalyptus gunnii	2	6	1	2	EU;ME	NA
Myrtaceae	Eucalyptus urophylla	6	12	3	3	FU;MA	NA
Myrtaceae	Eugenia uniflora	1	3	1	1	EU;GS;HF;IF;MA;ME	NA
Euphorbiaceae	Euphorbia esula	1	4	1	1	ME	NA
Brassicaceae	Eutrema parvulum	3	5	1	2	NA	NA
Brassicaceae	Eutrema salsugineum	20	27	7	12	NA	1
Polygonaceae	Fagopyrum tataricum	12	9	4	5	AF;HF;ME	1
Fagaceae	Fagus sylvatica	14	17	5	9	FU;MA;ME;PO;SU	NA
Poaceae	Festuca mairei				1	NA	NA
Poaceae	Festuca ovina	1	2	1	1	AF;EU	NA
Poaceae	Festuca pratensis x Lolium multiflorum				1	NA	NA
Poaceae	Festuca rubra				1	EU;PO	NA
Moraceae	Ficus septica	3	13	1	1	AF;EU;FU;HF;IF:MA;ME;PO;SU	NA
Rosaceae	Fragaria ananassa				1	HF;ME	NA
Rosaceae	Fragaria vesca	9	17	9	11	EU;GS:HF;MA;ME;CWR	1
Oleaceae	Fraxinus mandshurica	2	10	1	1	MA	NA
Oleaceae	Fraxinus pennsylvanica	2	6	1	2	EU;MA;ME	NA
Fabaceae	Galega orientalis	2	3	1	1	AF;ME	NA
Ginkgoaceae	Ginkgo biloba	3	7	2	3	EU;HF;MA;ME	NA
Fabaceae	Gleditsia sinensis				1	ME	NA
Fabaceae	Glycine max	132	71	77	114	AF;EU;FU;GS;HF;MA;ME;PO;CWR	1
Fabaceae	Glycyrrhiza uralensis	12	5	2	3	AF;EU;ME;SU	NA
Malvaceae	Gossypium anomalum	1	1	1	1	GS;ME;CWR	NA
Malvaceae	Gossypium arboreum	43	35	12	17	AF;EU;GS:HF;IF;MA;ME;PO;CWR	1
Malvaceae	Gossypium barbadense	32	28	6	7	EU;FU;GS;HF;MA;ME;PO;SU;CWR	1
Malvaceae	Gossypium darwinii				1	GS;CWR	1
Malvaceae	Gossypium herbaceum	18	25	6	7	AF;EU;GS;HF;MA;ME;PO;CWR	NA
Malvaceae	Gossypium hirsutum	140	76	68	86	AF;EU;FU;GS:HF;MA;ME;PO;CWR	1
Malvaceae	Gossypium raimondii	23	32	13	15	GS;CWR	1
Malvaceae	Gossypium tomentosum	1	2	1	3	NA	1
Asteraceae	Guizotia abyssinica				1	AF;EU;FU;GS:HF;MA;ME	NA
Bromeliaceae	Guzmania monostachia	2	17	3	4	EU	NA
Gesneriaceae	Haberlea rhodopensis	12	14	2	3	NA	NA
Fabaceae	Halimodendron halodendron	4	7	1	1	NA	NA
Chenopodiaceae	Halostachys caspica	5	8	2	2	MA	NA
Chenopodiaceae	Haloxylon ammodendron	14	10	3	6	AF;EU;FU;MA;ME	NA
Chenopodiaceae	Haloxylon persicum				1	EU;FU	NA
Chenopodiaceae	Haloxylon salicornicum	5	1	1	1	AF;EU;FU;HF;MA;ME;PO;SU	NA
Chenopodiaceae	Haloxylon scoparium	2	1	1	1	FU;HF;ME	NA
Fabaceae	Hedysarum coronarium	1	1	1	2	NA	NA
Cistaceae	Helianthemum almeriense	2	1	1	1	NA	NA
Asteraceae	Helianthus annuus	17	26	12	24	AF;EU;FU;GS:HF;IF;MA;ME;PO;CWR	1
Asteraceae	Helianthus tuberosus	2	4	1	2	AF;FU;GS:HF;ME;PO;CWR	NA
Poaceae	Hemarthria altissima	2	3	1	1	AF;ME	NA
Euphorbiaceae	Hevea brasiliensis	21	30	12	15	AF;EU;FU;GS:HF;MA;ME	1
Malvaceae	Hibiscus cannabinus	1	3	1	1	AF;EU;FU;GS:HF;MA;ME;SU	NA
Elaeagnaceae	Hippophae rhamnoides	15	23	4	4	EU;HF;MA;ME	NA
Poaceae	Hordelymus europaeus				1	NA	NA
Poaceae	Hordeum bogdanii	1	4	1	1	GS;CWR	NA
Poaceae	Hordeum brevisubulatum	1	6	2	2	GS;CWR	NA
Poaceae	Hordeum vulgare	82	63	53	82	AF;EU;FU;GS:HF;MA;ME;PO;SU;CWR	1
Cactaceae	Hylocereus undatus	2	6	1	2	NA	NA
Hymenophyllaceae	Hymenophyllum caudiculatum	1	6	1	1	NA	NA
Hypericaceae	Hypericum perforatum	5	2	1	1	MA;ME;PO	NA
Aquifoliaceae	Ilex paraguariensis	4	20	2	3	GS;HF;MA;ME;SU;CWR	NA
Convolvulaceae	Ipomoea batatas	29	29	13	22	AF;EU;GS;HF;MA;ME;PO;SU;CWR	1
Convolvulaceae	Ipomoea cairica	8	6	1	1	AF;EU;MA;ME;PO	NA
Convolvulaceae	Ipomoea imperati				1	EU;ME	NA
Convolvulaceae	Ipomoea nil	2	2	1	1	AF;EU;HF;MA;ME;PO;SU	NA
Convolvulaceae	Ipomoea trifida	4	3	2	4	GS;CWR	1
Iridaceae	Iris lactea	2	5	1	2	ME	NA
Convolvulaceae	Jacquemontia pentanthos				1	NA	NA
Euphorbiaceae	Jatropha curcas	29	37	19	27	AF;EU;FU;GS:HF;MA;ME;PO	NA
Euphorbiaceae	Jatropha integerrima				1	EU;ME	NA
Juglandaceae	Juglans regia	11	15	3	3	EU;GS;HF;MA;ME;CWR	1
Crassulaceae	Kalanchoe daigremontiana	3	4	1	1	EU;PO	NA
Crassulaceae	Kalanchoe fedtschenkoi	5	1	1	1	EU	NA
Chenopodiaceae	Kalidium foliatum	1	2	1	1	AF;EU;HF:MA	NA
Rhizophoraceae	Kandelia candel	2	1	1	2	FU;MA;ME	NA
Fabaceae	Lablab purpureus	8	11	3	4	AF;EU;GS;HF;MA;ME;PO;CWR	NA
Asteraceae	Lactuca sativa	8	5	3	5	AF;GS;HF;ME;PO;CWR	NA
Asteraceae	Lactuca serriola				1	EU;GS;HF;ME;PO;CWR	NA
Cucurbitaceae	Lagenaria siceraria	2	8	1	1	AF;EU;GS;HF;MA;ME;PO;SU;CWR	1
Verbenaceae	Lantana camara				1	AF;EU;FU;GS;HF;IF;MA;ME;PO;SU	NA
Pinaceae	Larix kaempferi	3	14	2	2	EU;MA;ME	NA
Zygophyllaceae	Larrea tridentata	8	2	1	1	EU;MA;ME;PO	NA
Fabaceae	Lathyrus sativus	1	1	1	3	AF;EU;GS;HF;ME;PO;CWR	NA
Fabaceae	Lens culinaris				1	AF;EU;GS;HF;ME;CWR	NA
Asteraceae	Leontopodium leontopodioides				1	NA	NA
Brassicaceae	Lepidium latifolium	3	3	1	2	HF;ME	NA
Poaceae	Leptochloa fusca	1	10	1	1	NA	NA
Fabaceae	Leucaena leucocephala				1	AF;EU;FU;GS;HF;IF;MA;ME;PO;SU	NA
Poaceae	Leymus chinensis	16	12	4	5	AF;EU;GS;HF;CWR	NA
Poaceae	Leymus mollis	1	6	1	1	EU;GS;MA;ME;CWR	NA
Poaceae	Leymus multicaulis				1	AF;GS;CWR	NA
Liliaceae	Lilium lancifolium	9	6	3	3	EU;HF;ME	NA
Liliaceae	Lilium longiflorum	5	16	3	3	EU;ME;PO	NA
Liliaceae	Lilium pumilum	2	9	1	1	HF;ME	NA
Liliaceae	Lilium regale	1	6	1	1	EU	NA
Plumbaginaceae	Limonium bicolor				1	ME	NA
Linaceae	Linum usitatissimum	10	7	2	2	AF;FU;HF;MA;ME;PO	1
Poaceae	Lolium multiflorum	9	26	4	7	AF;EU;HF;ME;PO	NA
Poaceae	Lolium perenne	13	26	5	9	AF;EU;GS:HF;ME;PO	NA
Fabaceae	Lotus corniculatus	12	13	3	3	AF;EU;HF;IF;ME;PO	NA
Fabaceae	Lotus tenuis	1	7	1	1	NA	NA
Fabaceae	Lupinus angustifolius	1	6	1	3	GS;ME;CWR	1
Fabaceae	Lupinus luteus	4	10	1	1	AF;EU;GS;HF;ME;PO;CWR	NA
Solanaceae	Lycium barbarum	10	4	2	2	HF;ME;PO	NA
Solanaceae	Lycium chinense	5	16	3	3	EU;HF;ME	NA
Papaveraceae	Macleaya cordata				1	EU;ME	NA
Fabaceae	Macrotyloma uniflorum	10	22	5	7	AF;EU;GS;HF;ME	NA
Rosaceae	Malus baccata	10	14	2	2	EU;GS;HF;MA;ME;CWR	NA
Rosaceae	Malus hupehensis	4	20	2	5	EU;GS;HF;CWR	NA
Rosaceae	Malus micromalus				1	NA	NA
Rosaceae	Malus prunifolia	15	19	7	7	NA	NA
Rosaceae	Malus pumila	28	41	16	24	EU;FU;GS;HF;MA;ME;PO;SU;CWR	NA
Rosaceae	Malus sieversii	7	23	4	6	NA	NA
Euphorbiaceae	Manihot esculenta	30	34	14	29	AF;EU;FU;GS;HF;IF;MA;ME;PO;SU;CWR	1
Apocynaceae	Marsdenia tenacissima	7	3	1	1	MA;ME	NA
Fabaceae	Medicago sativa	64	71	38	49	AF;EU;FU;GS:HF;IF;MA;ME;PO;SU	NA
Fabaceae	Medicago sativa ssp. falcata	4	7	2	3	AF;GS:ME;CWR	NA
Fabaceae	Medicago truncatula	89	68	46	67	AF;EU;GS;PO;CWR	1
Lamiaceae	Melissa officinalis	4	4	1	1	EU;HF;IF;MA;ME	NA
Aizoaceae	Mesembryanthemum crystallinum	11	15	4	5	EU;HF:ME	NA
Asteraceae	Microseris douglasii				1	NA	NA
Poaceae	Miscanthus lutarioriparius	8	26	3	4	NA	NA
Poaceae	Miscanthus sinensis	1	3	1	1	EU;GS;MA;ME;CWR	NA
Moringaceae	Moringa oleifera	2	6	2	4	AF;EU;FU;GS;HF:IF;MA;ME;PO;SU	NA
Moraceae	Morus alba	10	10	5	7	AF;EU;FU;GS;HF;MA;ME;PO	1
Moraceae	Morus notabilis	7	2	1	1	NA	NA
Musaceae	Musa acuminata	16	16	8	10	AF;GS:HF;MA;ME;SU;CWR	1
Musaceae	Musa itinerans	1	1	1	1	GS;CWR	NA
Musaceae	Musa x paradisiaca				1	AF;EU;HF;IF;MA;ME;SU	NA
Cactaceae	Myrtillocactus geometrizan				1	EU;HF;MA;ME	NA
Cactaceae	Myrtillocactus geometrizans				1	EU;HF;MA;ME	NA
Nelumbonaceae	Nelumbo nucifera	4	5	2	2	AF;EU;GS;HF;IF;MA;ME;PO;SU	1
Apocynaceae	Nerium oleander	1	1	1	1	EU;HF:MA;ME;PO	NA
Solanaceae	Nicotiana attenuata	11	16	4	5	ME	1
Solanaceae	Nicotiana benthamiana	134	65	63	72	ME	NA
Solanaceae	Nicotiana glauca	1	7	1	1	EU;GS;HF;MA;ME;PO;SU	NA
Solanaceae	Nicotiana glutinosa	4	1	1	1	GS	NA
Solanaceae	Nicotiana langsdorffii	2	3	1	1	EU;GS	NA
Solanaceae	Nicotiana nudicaulis	6	13	3	3	NA	NA
Solanaceae	Nicotiana plumbaginifolia	1	8	1	1	GS	NA
Solanaceae	Nicotiana sylvestris	3	14	2	2	NA	NA
Solanaceae	Nicotiana tabacum	113	84	75	98	EU;GS;HF;IF;MA;ME;PO;SU	NA
Solanaceae	Nicotiana tomentosiformis	2	5	1	1	EU;GS	NA
Nitrariaceae	Nitraria tangutorum	6	14	2	2	NA	NA
Lamiaceae	Ocimum tenuiflorum	1	3	1	1	HF;MA;ME;PO;SU	NA
Oleaceae	Olea europaea	1	10	1	4	AF;EU;FU;GS:HF;MA;ME;SU;CWR	1
Asteraceae	Opisthopappus taihangensis	2	13	2	2	NA	NA
Cactaceae	Opuntia robusta				1	EU;HF	NA
Orobanchaceae	Orobanche cumana				1	NA	NA
Poaceae	Oropetium thomaeum	1	10	1	2	ME	NA
Poaceae	Oryza australiensis				1	GS;CWR	NA
Poaceae	Oryza barthii				1	AF;GS;HF;MA;CWR	1
Poaceae	Oryza glaberrima	1	5	1	2	AF;GS;HF;ME;CWR	NA
Poaceae	Oryza officinalis	1	1	1	1	GS;ME;CWR	1
Poaceae	Oryza rufipogon	10	15	5	10	AF;GS;HF;ME;SU;CWR	1
Poaceae	Oryza sativa	332	102	259	364	AF;EU;FU;GS;HF;MA;ME;SU;CWR	1
Fabaceae	Oxytropis ochrocephala	9	12	2	2	ME	NA
Cactaceae	Pachycereus pringlei	1	4	1	1	EU;HF;ME	NA
Paeoniaceae	Paeonia lactiflora	7	12	1	1	EU;ME	NA
Paeoniaceae	Paeonia ostii	2	9	1	1	GS;ME	NA
Paeoniaceae	Paeonia suffruticosa	3	5	1	2	ME	NA
Araliaceae	Panax ginseng	10	18	4	4	HF;MA;ME	NA
Amaryllidaceae	Pancratium maritimum	2	9	1	1	EU;HF:ME	NA
Poaceae	Panicum hallii				4	AF	1
Poaceae	Panicum miliaceum	2	5	1	4	AF;GS;HF;MA;ME;CWR	1
Poaceae	Panicum virgatum	9	21	5	11	AF;EU;FU;GS;HF;ME;CWR	NA
Brassicaceae	Parrya nudicaulis	2	2	1	1	ME	NA
Asteraceae	Parthenium hysterophorus	5	13	1	1	ME;PO	NA
Poaceae	Paspalum notatum	3	4	1	1	AF;EU;ME	NA
Poaceae	Paspalum vaginatum	4	3	1	1	AF;EU;ME	NA
Paulowniaceae	Paulownia fortunei	4	6	2	2	EU	NA
Paulowniaceae	Paulownia tomentosa	2	2	2	3	EU;MA;ME	NA
Lamiaceae	Perilla frutescens	4	5	1	1	AF;HF;MA;ME;PO	NA
Orchidaceae	Phalaenopsis equestris	6	3	1	1	EU	NA
Poaceae	Phalaris arundinacea	1	2	1	1	AF;EU;HF;MA;ME;PO	NA
Fabaceae	Phaseolus acutifolius	2	3	2	2	AF;EU;HF;MA;ME;PO	NA
Fabaceae	Phaseolus coccineus	1	3	1	1	AF;EU;GS:HF;ME;PO;CWR	NA
Fabaceae	Phaseolus dumosus	1	3	1	1	GS;HF;CWR	NA
Fabaceae	Phaseolus lunatus	3	1	1	1	AF;EU;GS:HF;ME;PO;CWR	1
Fabaceae	Phaseolus vulgaris	43	59	34	48	AF;EU;GS:HF;ME;PO;CWR	1
Rutaceae	Phellodendron amurense	2	10	2	2	EU;MA;ME	NA
Arecaceae	Phoenix dactylifera	1	3	1	3	AF;EU;FU;GS:HF;MA;ME;SU;CWR	1
Asphodelaceae	Phormium tenax				1	EU;MA;ME	NA
Poaceae	Phyllostachys edulis	43	38	16	19	EU;HF;MA;ME	NA
Pinaceae	Picea abies	3	5	1	5	EU;FU;MA;ME;SU	NA
Pinaceae	Picea glauca	1	2	1	2	NA	NA
Pinaceae	Picea mariana				1	EU;MA;ME;SU	NA
Pinaceae	Picea sitchensis				1	EU;MA;ME	NA
Pinaceae	Picea wilsonii	13	20	2	2	ME	NA
Pinaceae	Pinus albicaulis				1	EU;MA	NA
Pinaceae	Pinus banksiana	3	2	1	1	EU;MA;ME	NA
Pinaceae	Pinus contorta	4	5	2	2	EU;MA;ME	NA
Pinaceae	Pinus echinata				1	EU;MA;ME	NA
Pinaceae	Pinus flexilis				1	EU;MA;ME	NA
Pinaceae	Pinus halepensis	2	22	3	7	EU;FU;HF;MA;ME	NA
Pinaceae	Pinus jeffreyi				1	EU;MA;ME	NA
Pinaceae	Pinus kesiya	1	1	1	1	EU;FU;HF;MA;ME	NA
Pinaceae	Pinus koraiensis	2	4	2	2	HF;MA;ME	NA
Pinaceae	Pinus lambertiana				1	EU;MA;ME	NA
Pinaceae	Pinus monticola				1	EU;MA;ME	NA
Pinaceae	Pinus pinaster	3	8	3	11	EU;MA;ME	NA
Pinaceae	Pinus pinea				1	EU;GS;HF;MA;ME	NA
Pinaceae	Pinus ponderosa	2	12	1	2	EU;FU;MA;ME;PO	NA
Pinaceae	Pinus radiata	2	5	1	1	EU;HF;MA;ME	NA
Pinaceae	Pinus strobus	1	7	1	2	EU;FU;MA;ME;SU	NA
Pinaceae	Pinus sylvestris	10	16	2	6	EU;FU;HF;MA;ME;SU	NA
Pinaceae	Pinus tabuliformis	2	5	1	1	MA;ME	NA
Pinaceae	Pinus taeda	3	7	3	5	MA;ME;PO	NA
Anacardiaceae	Pistacia vera	3	5	2	2	GS;HF;MA;ME;CWR	NA
Fabaceae	Pisum sativum	8	13	5	11	AF;GS;HF;CWR	NA
Plantaginaceae	Plantago lanceolata	6	2	1	1	AF;GS;HF;MA;ME	NA
Plantaginaceae	Plantago major				1	AF;EU;GS:HF;MA;ME	NA
Poaceae	Poa pratensis	13	19	4	4	AF;EU;ME	NA
Poaceae	Pogonatherum paniceum	3	11	2	2	ME	NA
Salicaceae	Populus alba	22	36	14	16	EU;FU;GS;HF;MA;ME	NA
Salicaceae	Populus angustifolia				1	ME	NA
Salicaceae	Populus balsamifera	11	9	2	3	EU;HF;MA;ME	NA
Salicaceae	Populus cathayana				3	EU;FU	NA
Salicaceae	Populus davidiana	4	4	2	2	NA	NA
Salicaceae	Populus deltoides	7	19	5	6	AF;EU;FU;HF;MA;ME	1
Salicaceae	Populus euphratica	56	46	26	29	EU;FU;MA;ME	NA
Salicaceae	Populus hopeiensis	5	5	2	3	NA	NA
Salicaceae	Populus laurifolia	1	1	1	1	FU;MA	NA
Salicaceae	Populus nigra	26	30	12	13	EU;MA;ME	NA
Salicaceae	Populus simonii	10	14	6	8	EU;MA	1
Salicaceae	Populus szechuanica	1	5	1	1	EU;MA	NA
Salicaceae	Populus tremula	22	28	8	14	EU;FU;MA;ME	NA
Salicaceae	Populus tremuloides				1	AF;EU;MA;ME	NA
Salicaceae	Populus X tomentosa	3	16	2	6	ME	NA
Salicaceae	Populus yunnanensis	1	8	2	2	NA	NA
Portulacaceae	Portulaca oleracea	1	5	1	1	AF;EU;GS:HF;MA;ME;PO;SU	NA
Potamogetonaceae	Potamogeton anguillanus				1	NA	NA
Fabaceae	Prosopis juliflora	7	8	3	3	AF;EU;FU;GS;HF:IF;MA;ME;PO	NA
Proteaceae	Protea repens	1	2	1	1	EU;ME	NA
Rosaceae	Prunus armeniaca				1	EU;FU;GS:HF;IF;MA;ME;PO;CWR	NA
Rosaceae	Prunus avium	3	3	1	1	EU;GS:HF;MA;ME;CWR	1
Rosaceae	Prunus domestica	1	6	1	1	GS;HF;MA;ME;PO;CWR	NA
Rosaceae	Prunus dulcis	2	6	1	1	NA	1
Rosaceae	Prunus mahaleb				1	EU;GS:HF;MA;ME;CWR	NA
Rosaceae	Prunus mongolica	1	8	1	1	GS;CWR	NA
Rosaceae	Prunus mume	8	8	3	3	EU;GS;HF;MA;ME;CWR	1
Rosaceae	Prunus persica	11	18	6	8	EU;FU;GS;HF;IF;MA;ME;PO;CWR	1
Poaceae	Psathyrostachys huashanica	1	4	1	2	NA	NA
Poaceae	Psathyrostachys juncea	2	3	1	1	AF;GS	NA
Pteridaceae	Pteris vittata	2	4	1	1	EU;ME;PO	NA
Juglandaceae	Pterocarya stenoptera	8	4	2	2	EU;GS	NA
Poaceae	Puccinellia chinampoensis	1	9	1	1	NA	NA
Poaceae	Puccinellia tenuiflora	1	1	1	1	NA	NA
Brassicaceae	Pugionium cornutum	4	5	1	1	AF;EU;HF;MA	NA
Rosaceae	Pyrus betulifolia	3	5	2	2	EU;GS;MA;CWR	1
Rosaceae	Pyrus bretschneideri	7	8	4	4	GS;HF;CWR	NA
Rosaceae	Pyrus communis	1	2	1	1	GS;HF:MA;ME;PO;CWR	NA
Rosaceae	Pyrus elaeagrifolia				1	GS;ME	NA
Rosaceae	Pyrus pyrifolia	2	14	2	2	GS;ME;CWR	NA
Rosaceae	Pyrus ussuriensis	2	6	1	1	NA	1
Fagaceae	Quercus berberidifolia				1	NA	NA
Fagaceae	Quercus engelmannii				1	FU;MA	NA
Fagaceae	Quercus ilex	3	10	2	5	EU;HF;MA;ME	NA
Fagaceae	Quercus lobata	1	1	1	2	MA;ME	1
Fagaceae	Quercus petraea				2	EU;MA;ME;PO	NA
Fagaceae	Quercus pubescens	1	4	1	2	EU;MA;ME	NA
Fagaceae	Quercus robur				4	AF;EU;FU;HF;MA;ME;PO	NA
Fagaceae	Quercus rubra				2	EU;MA;ME;PO	NA
Fagaceae	Quercus suber	4	5	1	3	FU;MA;ME	NA
Brassicaceae	Raphanus sativus	3	5	1	1	AF;GS;HF;PO;CWR	1
Tamaricaceae	Reaumuria soongorica	6	21	4	5	NA	NA
Tamaricaceae	Reaumuria trigyna	8	14	1	1	NA	NA
Fabaceae	Retama raetam	2	9	1	1	AF;EU;FU;MA;ME;PO;SU	NA
Crassulaceae	Rhodiola crenulata	5	9	1	1	NA	NA
Ericaceae	Rhododendron catawbiense	1	6	1	1	EU	NA
Ericaceae	Rhododendron delavayi				1	ME	NA
Anacardiaceae	Rhus chinensis	1	2	1	1	EU;HF;MA;ME	NA
Euphorbiaceae	Ricinus communis	17	28	7	11	AF;EU;FU;HF:MA;ME;PO;SU	NA
Fabaceae	Robinia pseudoacacia	15	21	5	5	EU;FU;HF;IF;MA;PO	NA
Rosaceae	Rosa canina	7	9	1	1	EU;MA;ME	NA
Rosaceae	Rosa chinensis	1	5	1	2	EU;GS:ME	1
Rosaceae	Rosa hybrida	6	20	4	4	NA	NA
Rosaceae	Rubus geoides	1	4	1	1	NA	NA
Poaceae	Saccharum arundinaceum	5	3	1	2	AF;EU;FU;GS:HF;MA;ME;CWR	NA
Poaceae	Saccharum narenga	1	5	1	1	GS;CWR	NA
Poaceae	Saccharum officinarum	11	15	5	6	AF;EU;FU;GS;HF;IF;MA;ME;SU;CWR	NA
Chenopodiaceae	Salicornia brachiata	21	30	9	13	ME	NA
Chenopodiaceae	Salicornia depressa	3	10	2	3	AF;EU;HF;MA;ME	NA
Salicaceae	Salix psammophila	3	5	1	2	NA	NA
Salicaceae	Salix suchowensis	2	4	1	1	NA	NA
Salicaceae	Salix viminalis	3	5	1	1	EU;FU;MA;ME;SU	NA
Lamiaceae	Salvia hispanica	4	5	1	1	HF;MA;ME	NA
Lamiaceae	Salvia miltiorrhiza	31	39	17	17	ME	NA
Lamiaceae	Salvia officinalis				1	EU;HF;MA;ME;PO	NA
Asteraceae	Saussurea involucrata	4	16	2	4	ME	NA
Theaceae	Schima superba	1	2	1	1	MA	NA
Poaceae	Secale cereale	6	5	3	4	AF;EU;GS:HF;MA;ME;PO;CWR	NA
Crassulaceae	Sedum album	2	4	1	1	EU;ME	NA
Crassulaceae	Sedum alfredii				1	NA	NA
Selaginellaceae	Selaginella lepidophylla				3	EU;ME	NA
Selaginellaceae	Selaginella moellendorffii	3	13	2	3	ME	NA
Selaginellaceae	Selaginella tamariscina	5	21	2	3	EU;ME	NA
Cupressaceae	Sequoia sempervirens				1	EU;MA;ME	NA
Pedaliaceae	Sesamum indicum	10	23	7	11	AF;EU;FU;GS:HF;MA;ME;PO;SU;CWR	1
Aizoaceae	Sesuvium portulacastrum	8	15	3	3	AF;EU;GS;HF;ME	NA
Poaceae	Setaria italica	38	43	18	27	AF;HF:ME;CWR	1
Poaceae	Setaria viridis	10	18	3	4	AF;GS;HF;ME;CWR	1
Dipterocarpaceae	Shorea beccariana	2	5	1	1	NA	NA
Caryophyllaceae	Silene nicaeensis				1	NA	NA
Caryophyllaceae	Silene vulgaris				1	HF;ME	NA
Asteraceae	Silybum marianum	6	16	1	1	HF;IF;ME;PO	NA
Simmondsiaceae	Simmondsia chinensis	1	8	1	1	AF;EU;FU;GS;HF;MA;ME;PO;SU	NA
Brassicaceae	Sinapis alba				1	AF;EU;FU;GS;HF;ME;PO;CWR	NA
Solanaceae	Solanum aethiopicum				1	EU;GS:HF;MA;ME;CWR	NA
Solanaceae	Solanum anguivi				1	EU;GS;HF;MA:ME;CWR	NA
Solanaceae	Solanum chacoense	6	6	1	1	GS;CWR	NA
Solanaceae	Solanum chilense	6	16	2	7	GS;CWR	NA
Solanaceae	Solanum commersonii	2	7	1	1	GS;CWR	NA
Solanaceae	Solanum dulcamara	2	3	1	1	MA;ME;PO	NA
Solanaceae	Solanum habrochaites	23	29	7	9	ME	NA
Solanaceae	Solanum incanum				2	GS;HF;MA;ME;PO;SU;CWR	NA
Solanaceae	Solanum lycopersicoides	3	6	1	1	GS;CWR	NA
Solanaceae	Solanum lycopersicum	135	93	69	98	AF;EU;GS;HF;IF;MA;ME;PO;SU;CWR	1
Solanaceae	Solanum melongena				3	GS;HF;ME;PO;CWR	NA
Solanaceae	Solanum nigrum	1	5	1	1	HF;ME	NA
Solanaceae	Solanum pennellii	6	25	2	10	EU;GS;HF	1
Solanaceae	Solanum peruvianum	1	3	1	3	GS;MA;CWR	NA
Solanaceae	Solanum pimpinellifolium	11	13	2	3	GS;HF;CWR	1
Solanaceae	Solanum sitiens				1	GS;CWR	NA
Solanaceae	Solanum sogarandinum				2	GS;CWR	NA
Solanaceae	Solanum tuberosum	83	61	42	64	AF;EU;GS;HF;MA;ME;PO;SU;CWR	1
Fabaceae	Sophora alopecuroides	5	5	1	1	ME;PO	NA
Fabaceae	Sophora moorcroftiana	4	4	1	2	ME	NA
Poaceae	Sorghastrum nutans				3	AF;EU;PO	NA
Poaceae	Sorghum bicolor	56	48	36	63	AF;EU;FU;GS:HF;MA;ME;PO;SU;CWR	1
Poaceae	Sorghum halepense				1	AF;GS;HF;MA;ME;PO;SU;CWR	NA
Poaceae	Sorghum hybr				1	NA	NA
Poaceae	Sorghum propinquum				2	AF;GS:HF;CWR	NA
Araceae	Spathiphyllum wallisii	2	4	1	1	ME	NA
Chenopodiaceae	Spinacia oleracea	4	23	4	5	GS;HF;ME;PO;CWR	NA
Poaceae	Sporobolus stapfianus	4	9	2	3	AF	NA
Poaceae	Sporobolus subtilis				1	NA	NA
Thymelaeaceae	Stellera chamaejasme				1	MA;ME;PO	NA
Poaceae	Stenotaphrum secundatum	4	5	1	1	AF;EU;GS:HF;ME	NA
Asteraceae	Stevia rebaudiana	6	5	3	3	HF;ME	NA
Poaceae	Stipa capillacea	1	1	1	1	NA	NA
Poaceae	Stipa grandis	17	7	2	2	NA	NA
Poaceae	Stipagrostis pennata				1	AF;EU;MA	NA
Orobanchaceae	Striga gesnerioides	1	5	1	3	AF;MA;ME	NA
Orobanchaceae	Striga hermonthica	6	6	1	1	AF;HF;MA;ME	NA
Fabaceae	Stylosanthes guianensis	3	8	2	2	AF;EU;PO	NA
Fabaceae	Stylosanthes scabra	1	5	1	1	AF;ME;PO	NA
Chenopodiaceae	Suaeda corniculata	3	13	2	2	NA	NA
Chenopodiaceae	Suaeda monoica	3	16	1	1	AF;EU;HF;MA;ME	NA
Chenopodiaceae	Suaeda salsa	5	16	3	3	NA	NA
Tamaricaceae	Tamarix androssowii	2	5	1	1	NA	NA
Tamaricaceae	Tamarix hispida	17	20	9	12	EU	NA
Tamaricaceae	Tamarix ramosissima	1	3	1	1	AF;EU;IF;MA	NA
Asteraceae	Taraxacum officinale	9	4	1	1	HF;IF:ME	NA
Cleomaceae	Tarenaya hassleriana	7	15	1	1	EU;GS;HF;ME;CWR	NA
Loranthaceae	Taxillus chinensis	5	8	1	1	ME	NA
Taxaceae	Taxus cuspidata	1	4	1	1	EU;MA;ME;PO	NA
Aizoaceae	Tetragonia tetragonoides	5	8	1	1	AF;EU;GS;HF;ME;PO	NA
Malvaceae	Theobroma cacao				1	AF;EU;GS;HF;MA;ME;PO;SU;CWR	1
Poaceae	Thinopyrum bessarabicum				1	NA	NA
Poaceae	Thinopyrum elongatum				1	AF;EU;GS	1
Bromeliaceae	Tillandsia ionantha	3	2	1	1	NA	NA
Zygophyllaceae	Tribulus terrestris				1	AF;EU;GS;HF;ME;PO	NA
Asteraceae	Trichocline catharinensis	4	4	1	1	NA	NA
Fabaceae	Trifolium alexandrinum				1	ME	NA
Fabaceae	Trifolium ambiguum				1	AF:EU;GS;IF;ME	NA
Fabaceae	Trifolium arvense	1	11	1	1	AF;GS;ME	NA
Fabaceae	Trifolium pratense	2	7	1	1	AF;EU;GS;HF;IF;ME:PO	1
Fabaceae	Trifolium repens	11	32	5	6	AF;EU;GS:HF;IF;ME;PO;SU	1
Poaceae	Tripogon loliiformis	3	8	1	3	NA	NA
Poaceae	Triticum aestivum	200	82	131	181	AF;GS;HF;MA;ME;PO;CWR	1
Poaceae	Triticum dicoccoides	5	5	3	7	NA	1
Poaceae	Triticum monococcum	9	12	3	4	GS;HF;CWR	NA
Poaceae	Triticum turgidum	21	19	11	21	GS;HF;CWR	1
Poaceae	Triticum urartu	11	18	10	11	GS;CWR	1
Fabaceae	Tylosema esculentum				1	AF;EUGS;HF;MA;ME	NA
Ulmaceae	Ulmus davidiana	3	4	1	1	EU;MA	NA
Ulmaceae	Ulmus laciniata	3	4	1	1	MA	NA
Ulmaceae	Ulmus procera				1	EU;GS;MA;ME;PO;SU	NA
Ericaceae	Vaccinium corymbosum	5	19	3	3	EU;GS:HF;MA;ME	NA
Ericaceae	Vaccinium elliottii				1	NA	NA
Verbenaceae	Verbena bonariensis	1	3	1	1	EU;ME	NA
Euphorbiaceae	Vernicia fordii	4	5	1	1	HF;MA;ME;PO	NA
Fabaceae	Vicia faba	14	32	7	11	AF;EU;GS:HF;ME;PO;CWR	NA
Fabaceae	Vicia hirsuta	3	5	1	1	AF;GS;HF;ME;PO	NA
Fabaceae	Vicia sativa	7	6	2	5	AF;EU;GS;ME;PO;CWR	NA
Fabaceae	Vicia villosa	1	9	1	1	AF;EU;GS:HF;ME;PO	NA
Fabaceae	Vigna aconitifolia	4	15	3	3	AF;EU;GS;HF;ME;SU;CWR	NA
Fabaceae	Vigna angularis	4	9	3	3	AF;EU;GS;HF;MA;ME;CWR	1
Fabaceae	Vigna mungo	3	3	1	4	AF;EU:GS:HF;ME;CWR	1
Fabaceae	Vigna radiata	23	38	13	16	AF;EU;GS:HF;ME;CWR	1
Fabaceae	Vigna subterranea	2	2	1	3	AF;EU;GS:HF;ME;CWR	NA
Fabaceae	Vigna umbellata	2	6	1	2	AF;EU;GS:HF;MA;ME;CWR	NA
Fabaceae	Vigna unguiculata	32	51	24	40	AF;EU;GS;HF;MA;ME;CWR	1
Fabaceae	Vigna vexillata	1	5	1	1	AF;EU;GS:HF;MA:ME;CWR	NA
Violaceae	Viola lutea				1	ME	NA
Violaceae	Viola tricolor				1	EU;HF;ME	NA
Vitaceae	Vitis amurensis	37	29	8	9	EU;GS;HF;CWR	NA
Vitaceae	Vitis champinii	5	7	1	1	NA	NA
Vitaceae	Vitis girdiana	5	7	1	1	EU;GS;ME	NA
Vitaceae	Vitis labrusca	2	4	1	1	EU;GS;HF;ME;CWR	NA
Vitaceae	Vitis pseudoreticulata	9	17	4	4	GS;CWR	NA
Vitaceae	Vitis riparia	16	22	5	7	NA	1
Vitaceae	Vitis vinifera	74	59	34	47	AF;FU;GS;HF;MA;ME;SU;CWR	1
Solanaceae	Withania somnifera	10	20	3	3	AF;GS;HF;MA:ME;PO;SU	NA
Velloziaceae	Xerophyta humilis	2	8	1	1	MA;ME	NA
Velloziaceae	Xerophyta viscosa	4	14	2	4	NA	NA
Rutaceae	Zanthoxylum bungeanum	9	12	2	2	HF;MA;ME	NA
Poaceae	Zea mays	155	82	87	141	AF;EU;FU;GS:HF;IF;MA;ME;PO;SU;CWR	1
Zingiberaceae	Zingiber officinale	3	5	1	1	AF;EU;FU;GS:HF;IF;MA;ME;PO;SU	NA
Rhamnaceae	Ziziphus jujuba	7	14	4	4	AF;EU;FU;GS:HF;IF;MA;ME;PO;SU	1
Rhamnaceae	Ziziphus nummularia	6	4	2	3	AF;EU;HF;IF;MA;ME	NA
Zosteraceae	Zostera marina				1	MA;ME	NA
Poaceae	Zoysia japonica	10	12	3	3	EU	NA
Poaceae	Zoysia matrella	6	15	2	2	AF;EU	NA
Zygophyllaceae	Zygophyllum xanthoxylum	5	14	3	5	EU;FU;PO	NA
