# Supplementary material for: Meta-Analysis Reveals Challenges and Gaps for Genome-to-Phenome Research Underpinning Plant Drought Response
Source: Int J Mol Sci. 2022 Oct 14;23(20):12297. doi: 10.3390/ijms232012297 (PMC9602940; doi:10.3390/ijms232012297)
Supplement: Supplementary file 1 [file ijms-23-12297-s001.zip › Table_S3.csv]

Table S3. List of taxa identified in hyper-arid areas and the number of occurrences found for each taxon.
Species	OccurrenceCounts
Aeluropus littoralis	6
Alhagi sparsifolia	4
Alyssum obovatum	1
Atriplex centralasiatica	1
Boea hygrometrica	5
Caragana korshinskii	7
Chenopodium rubrum	1
Chorispora bungeana	3
Chrysolaena obovata	1
Citrus reticulata	1
Cleistogenes songorica	8
Colobanthus quitensis	1
Cynanchum thesioides	1
Dipterygium glaucum	1
Duma florulenta	1
Halimodendron halodendron	1
Jacquemontia pentanthos	1
Leontopodium leontopodioides	1
Leptochloa fusca	1
Lotus tenuis	1
Malus prunifolia	7
Malus sieversii	6
Nitraria tangutorum	2
Puccinellia tenuiflora	1
Quercus berberidifolia	1
Reaumuria soongorica	5
Rosa hybrida	4
Stipa capillacea	1
Suaeda corniculata	2
Tamarix androssowii	1
Tillandsia ionantha	1
Tripogon loliiformis	3
