# Supplementary material for: Meta-Analysis Reveals Challenges and Gaps for Genome-to-Phenome Research Underpinning Plant Drought Response
Source: Int J Mol Sci. 2022 Oct 14;23(20):12297. doi: 10.3390/ijms232012297 (PMC9602940; doi:10.3390/ijms232012297)
Supplement: Supplementary file 1 [file ijms-23-12297-s001.zip › Table_S4.csv]

Table S4. Full list of genes, gene families, and their respective orthologue groups identified in this meta-analysis.
Gene	InSitus	Family	Ontology
20ox2	GA20	Iron/ascorbate-dependent oxidoreductase family, GA20OX subfamily
2MMP	MMP	Peptidase M10A family, Matrix metalloproteinases (MMPs) subfamily	collagen catabolic process [GO:0030574]; developmental vegetative growth [GO:0080186]; extracellular matrix organization [GO:0030198]; multicellular organism development [GO:0007275]; negative regulation of leaf senescence [GO:1900056]; regulation of photoperiodism, flowering [GO:2000028]; response to cadmium ion [GO:0046686]; response to jasmonic acid [GO:0009753]; response to salt stress [GO:00…
4CL1	4CL1,4CL,Fm4CL,Cs4CL,Ma4CL,Gh4CL,Ta4CL	ATP-dependent AMP-binding enzyme family	phenylpropanoid metabolic process [GO:0009698]
4CL2	4CL2,Fm4CL2	ATP-dependent AMP-binding enzyme family	phenylpropanoid metabolic process [GO:0009698]; pollen exine formation [GO:0010584]
4CLL5	OPCL1	ATP-dependent AMP-binding enzyme family	jasmonic acid biosynthetic process [GO:0009695]; response to wounding [GO:0009611]
A2	A2,FrA2	TRAFAC class translation factor GTPase superfamily, Classic translation factor GTPase family, EF-Tu/EF-1A subfamily	translation [GO:0006412]; translational elongation [GO:0006414]
A3G2XYLT	AcUFGT,MdUFGT,UFGT	UDP-glycosyltransferase family	anthocyanin-containing compound biosynthetic process [GO:0009718]; cyanidin 3-O-glucoside biosynthetic process [GO:0033485]; kaempferol O-glucoside biosynthetic process [GO:0033330]; quercetin O-glucoside biosynthetic process [GO:0033303],anthocyanin-containing compound biosynthetic process [GO:0009718]; cellular response to cytokinin stimulus [GO:0071368]; cellular response to jasmonic acid stim…
A4	EF1A,OsEF1A,A4	TRAFAC class translation factor GTPase superfamily, Classic translation factor GTPase family, EF-Tu/EF-1A subfamily	translation [GO:0006412]; translational elongation [GO:0006414]
A6	A6	Glycosyl hydrolase 17 family	carbohydrate metabolic process [GO:0005975]; defense response [GO:0006952]; embryo development ending in seed dormancy [GO:0009793]; pollen exine formation [GO:0010584]
A9	A9	A9/FIL1 family
AAF	AAF,AtAAF,PaAAF	ATA15/OSA15 family	cellular response to oxidative stress [GO:0034599]; leaf senescence [GO:0010150]; reactive oxygen species metabolic process [GO:0072593]; vegetative to reproductive phase transition of meristem [GO:0010228]
AAO	AAO,AsAAO,AO,ZmAO	Multicopper oxidase family,FAD-dependent oxidoreductase 2 family, NadB subfamily	NAD biosynthetic process [GO:0009435]
AAO1	AhAAO1,ZmAAO1	Xanthine dehydrogenase family	abscisic acid biosynthetic process [GO:0009688]; auxin biosynthetic process [GO:0009851]
AAO2	AhAAO2,ZmAAO2,OsAAO2,AAO2,AtAO3	Xanthine dehydrogenase family	abscisic acid biosynthetic process [GO:0009688]; auxin biosynthetic process [GO:0009851]
AAO3	AAO3,AtAAO3,OsAAO3,GmAAO3	Xanthine dehydrogenase family	abscisic acid biosynthetic process [GO:0009688]; auxin biosynthetic process [GO:0009851]
AAO4	BnAAO4,OsAAO4	Xanthine dehydrogenase family	abscisic acid biosynthetic process [GO:0009688]; auxin biosynthetic process [GO:0009851]; cellular response to aldehyde [GO:0110096]; glucosinolate metabolic process [GO:0019760]; response to hydrogen peroxide [GO:0042542]; response to water deprivation [GO:0009414]
AAP3	TaAAP3	Amino acid/polyamine transporter 2 family, Amino acid/auxin permease (AAAP) (TC 2.A.18.2) subfamily	amino acid transmembrane transport [GO:0003333]; basic amino acid transport [GO:0015802]; defense response [GO:0006952]
ABA2	GIN1,ABA2,OsABA2,AhABA2,ZmABA2,AtABA2,CsABA2,SbSDR1,SDR1	Short-chain dehydrogenases/reductases (SDR) family	abscisic acid biosynthetic process [GO:0009688]; proline biosynthetic process [GO:0006561]; regulation of abscisic acid biosynthetic process [GO:0010115]; response to fructose [GO:0009750]; response to heat [GO:0009408]; response to water deprivation [GO:0009414]; sugar mediated signaling pathway [GO:0010182]
ABA3	ABA3,AhABA3,LOS5,AtLOS5	Class-V pyridoxal-phosphate-dependent aminotransferase family, MOCOS subfamily	abscisic acid biosynthetic process [GO:0009688]; auxin-activated signaling pathway [GO:0009734]; defense response to bacterium [GO:0042742]; molybdenum incorporation into molybdenum-molybdopterin complex [GO:0018315]; Mo-molybdopterin cofactor biosynthetic process [GO:0006777]; protein import into chloroplast stroma [GO:0045037]; response to cold [GO:0009409]; response to heat [GO:0009408]; respo…
ABA4	ABA4	ABA4 family (one gene)	abscisic acid biosynthetic process [GO:0009688]; regulation of superoxide anion generation [GO:0032928]; xanthophyll metabolic process [GO:0016122]
ABC1	ABC1,TaABC1	Protein kinase superfamily, ADCK protein kinase family	chlorophyll catabolic process [GO:0015996]; response to UV-B [GO:0010224]; ubiquinone biosynthetic process [GO:0006744]
ABC1K1	ABC1K1	Protein kinase superfamily, ADCK protein kinase family	cellular response to nitrogen starvation [GO:0006995]; chlorophyll catabolic process [GO:0015996]; photosynthetic electron transport chain [GO:0009767]; plastoglobule organization [GO:0080177]; positive regulation of carotenoid biosynthetic process [GO:1904143]; positive regulation of chlorophyll biosynthetic process [GO:1902326]; regulation of anthocyanin biosynthetic process [GO:0031540]; regul…
ABC1K3	ABC1K3	Protein kinase superfamily, ADCK protein kinase family	cellular response to nitrogen starvation [GO:0006995]; chloroplast organization [GO:0009658]; plastoglobule organization [GO:0080177]; protein stabilization [GO:0050821]; regulation of tocopherol cyclase activity [GO:1902171]; response to high light intensity [GO:0009644]; response to photooxidative stress [GO:0080183]; response to red light [GO:0010114]; response to water deprivation [GO:0009414]
ABCA1	ABCA1	ABC transporter superfamily, ABCA family, CPR flippase (TC 3.A.1.211) subfamily	lipid transport [GO:0006869]
ABCB17	SbPGP17	ABC transporter superfamily, ABCB family, Multidrug resistance exporter (TC 3.A.1.201) subfamily	transmembrane transport [GO:0055085]
ABCB19	PtABCB19	ABC transporter superfamily, ABCB family, Multidrug resistance exporter (TC 3.A.1.201) subfamily	acropetal auxin transport [GO:0010541]; anthocyanin accumulation in tissues in response to UV light [GO:0043481]; auxin-activated signaling pathway [GO:0009734]; auxin polar transport [GO:0009926]; auxin transport [GO:0060918]; basipetal auxin transport [GO:0010540]; formation of plant organ boundary [GO:0090691]; lateral root development [GO:0048527]; photomorphogenesis [GO:0009640]; positive gr…
ABCB7	SbPGP7	ABC transporter superfamily, ABCB family, Multidrug resistance exporter (TC 3.A.1.201) subfamily	transmembrane transport [GO:0055085]
ABCC1	VvABCC1,SlMRP1	ABC transporter superfamily, ABCC family, Conjugate transporter (TC 3.A.1.208) subfamily	(+)-abscisic acid D-glucopyranosyl ester transmembrane transport [GO:1902418]; arsenite transport [GO:0015700]; response to arsenic-containing substance [GO:0046685]; transmembrane transport [GO:0055085]
ABCC4	AtABCC4,AtMRP4	ABC transporter superfamily, ABCC family, Conjugate transporter (TC 3.A.1.208) subfamily	response to nematode [GO:0009624]; response to water deprivation [GO:0009414]; response to wounding [GO:0009611]; stomatal movement [GO:0010118]; transmembrane transport [GO:0055085],transmembrane transport [GO:0055085],DroughtDB Tags: Ion and Osmotic Homeostasis;Stomatal Movement;Functional Proteins;Channels and Transporters;Transporters;Others
ABCC5	AtABCC5	ABC transporter superfamily, ABCC family, Conjugate transporter (TC 3.A.1.208) subfamily	abscisic acid-activated signaling pathway involved in stomatal movement [GO:1901527]; cellular potassium ion homeostasis [GO:0030007]; response to salt stress [GO:0009651]; transmembrane transport [GO:0055085]
ABCD1	CTS	ABC transporter superfamily, ABCD family, Peroxisomal fatty acyl CoA transporter (TC 3.A.1.203) subfamily	lipid catabolic process [GO:0016042]
ABCF2	GCN2	ABC transporter superfamily, ABCF family, EF3 (TC 3.A.1.121) subfamily
ABCF4	GCN4,AtGCN4	ABC transporter superfamily, ABCF family, EF3 (TC 3.A.1.121) subfamily
ABCG	ABCG,AtABCG	abc transporter g family member	DroughtDB Tags: ABC-transporter
ABCG11	AtABCG11	ABC transporter superfamily, ABCG family, Eye pigment precursor importer (TC 3.A.1.204) subfamily	cotyledon vascular tissue pattern formation [GO:0010588]; cutin transport [GO:0080051]; fatty acid transport [GO:0015908]; response to abscisic acid [GO:0009737]; response to salt stress [GO:0009651]; response to wounding [GO:0009611]; stem vascular tissue pattern formation [GO:0010222]; transmembrane transport [GO:0055085]
ABCG20	MtABCG20	ABC transporter superfamily, ABCG family, Eye pigment precursor importer (TC 3.A.1.204) subfamily	suberin biosynthetic process [GO:0010345]; transmembrane transport [GO:0055085]
ABCG22	AtABCG22,ABCG22	ABC transporter superfamily, ABCG family, Eye pigment precursor importer (TC 3.A.1.204) subfamily	response to water deprivation [GO:0009414]; transmembrane transport [GO:0055085]; transpiration [GO:0010148]
ABCG25	AtABCG25,ABCG25,CqABCG25	abc transporter g family member	DroughtDB Tags: ABC-transporter, ABA export from cells
ABCG32	ABCG32	ABC transporter superfamily, ABCG family, PDR (TC 3.A.1.205) subfamily	transmembrane transport [GO:0055085],cuticle development [GO:0042335]; transmembrane transport [GO:0055085]
ABCG36	AtABCG36,ABCG36	ABC transporter superfamily, ABCG family, PDR (TC 3.A.1.205) subfamily	cadmium ion transport [GO:0015691]; cellular response to indolebutyric acid stimulus [GO:0071366]; defense response by callose deposition in cell wall [GO:0052544]; defense response to bacterium [GO:0042742]; defense response to fungus, incompatible interaction [GO:0009817]; indole glucosinolate catabolic process [GO:0042344]; negative regulation of defense response [GO:0031348]; response to absc…
ABCG40	ABCG40,AtABCG40,AaABCG40	abc transporter g family member	DroughtDB Tags: ABC-transporter, ABA import
ABCI8	NAP1	HEM-1/HEM-2 family,UPF0051 (ycf24) family	actin filament organization [GO:0007015]; actin nucleation [GO:0045010]; cell migration [GO:0016477]; cell morphogenesis [GO:0000902]; cell projection assembly [GO:0030031]; cortical actin cytoskeleton organization [GO:0030866]; multidimensional cell growth [GO:0009825]; positive regulation of transcription, DNA-templated [GO:0045893]; trichome morphogenesis [GO:0010090],cellular iron ion homeost…
ABF	ABF,MeABF	BZIP family, ABI5 subfamily	DroughtDB Tags: ABA responsive element (ABRE) binding bZIP factor
ABF2	ABF2,AtABF2,GhABF2,RhABF2,NtABF2,OsABF2,VvABF2,SlABF2,BnABF2,MsABF2	BZIP family, ABI5 subfamily	abscisic acid-activated signaling pathway [GO:0009738]
ABF4	ABF4,AtABF4,IbABF4,AtAREB2,AREB2,SiAREB2,SlAREB2,OsAREB2	BZIP family, ABI5 subfamily	abscisic acid-activated signaling pathway [GO:0009738]
ABH1	ABH1,CBP80	NCBP1 family	7-methylguanosine mRNA capping [GO:0006370]; long-day photoperiodism, flowering [GO:0048574]; mRNA cis splicing, via spliceosome [GO:0045292]; mRNA splicing, via spliceosome [GO:0000398]; mRNA transport [GO:0051028]; nuclear-transcribed mRNA catabolic process, nonsense-mediated decay [GO:0000184]; primary miRNA processing [GO:0031053]; response to abscisic acid [GO:0009737]; RNA splicing, via end…
ABI	ABI	PP2C family	Copied from SP: abscisic acid-activated signaling pathway; negative regulation of abscisic acid-activated signaling pathway; negative regulation of protein kinase activity; photoinhibition; regulation of stomatal opening; response to abscisic acid; response to heat; response to osmotic stress; response to water deprivation
ABI1	ABI1,AtABI1	PP2C family	abscisic acid-activated signaling pathway [GO:0009738]; negative regulation of abscisic acid-activated signaling pathway [GO:0009788]; protein dephosphorylation [GO:0006470]; regulation of abscisic acid-activated signaling pathway [GO:0009787]; regulation of stomatal movement [GO:0010119]; response to abscisic acid [GO:0009737]; response to cold [GO:0009409]; response to heat [GO:0009408]
ABI2	OsABI2,ABI2,AtABI2,PvABI2,GmABI2	PP2C family	abscisic acid-activated signaling pathway [GO:0009738]; negative regulation of abscisic acid-activated signaling pathway [GO:0009788]; negative regulation of protein kinase activity [GO:0006469]; photoinhibition [GO:0010205]; regulation of stomatal opening [GO:1902456]; response to abscisic acid [GO:0009737]; response to heat [GO:0009408]; response to osmotic stress [GO:0006970]; response to wate…
ABI3	ABI3,AtABI3,PpABI3,OsABI3	ABI3 family (one gene)	abscisic acid-activated signaling pathway [GO:0009738]; embryo development ending in seed dormancy [GO:0009793]; mitochondria-nucleus signaling pathway [GO:0031930]; plastid organization [GO:0009657]; positive regulation of transcription, DNA-templated [GO:0045893]; response to abscisic acid [GO:0009737]; response to auxin [GO:0009733]
ABI4	SiABI4,ABI4,OsABI4	AP2/ERF transcription factor family, ERF subfamily	abscisic acid-activated signaling pathway [GO:0009738]; defense response [GO:0006952]; ethylene-activated signaling pathway [GO:0009873]; lateral root development [GO:0048527]; mitochondria-nucleus signaling pathway [GO:0031930]; positive regulation of transcription, DNA-templated [GO:0045893]; regulation of L-ascorbic acid biosynthetic process [GO:2000082]; regulation of protein localization [GO…
ABI5	OsOREB1,ABI5,CsABI5,AtABI5,HvABI5,ZmABI5,OsABI5,GhABI5	BZIP family, ABI5 subfamily	abscisic acid-activated signaling pathway [GO:0009738]; pollen maturation [GO:0010152]; regulation of transcription, DNA-templated [GO:0006355]; response to abscisic acid [GO:0009737]; response to cold [GO:0009409]; response to salt stress [GO:0009651]; response to water deprivation [GO:0009414]; seed germination [GO:0009845]; seedling development [GO:0090351],abscisic acid-activated signaling pa…
ABP	ABP,OsABP	Germin family	DroughtDP Tags: Regulatory Proteins;Gene Expression;Transcription Factors;bZIP
ABP9	ABP9	Germin family	DroughtDP Tags: Regulatory Proteins;Gene Expression;Transcription Factors;bZIP
ABR1	ABR1,AtERF111	AP2/ERF transcription factor family, ERF subfamily	abscisic acid-activated signaling pathway [GO:0009738]; defense response to fungus [GO:0050832]; ethylene-activated signaling pathway [GO:0009873]; negative regulation of abscisic acid-activated signaling pathway [GO:0009788]; response to abscisic acid [GO:0009737]; response to glucose [GO:0009749]; response to osmotic stress [GO:0006970]; response to salt [GO:1902074]
ACA1	ZmACA1	Alpha-class carbonic anhydrase family,Cation transport ATPase (P-type) (TC 3.A.3) family, Type IIB subfamily
ACC1	GK	ACC1 family (one gene)	embryo development ending in seed dormancy [GO:0009793]; fatty acid elongation [GO:0030497]; malonyl-CoA biosynthetic process [GO:2001295]; meristem structural organization [GO:0009933]; primary shoot apical meristem specification [GO:0010072]; response to cytokinin [GO:0009735]; root development [GO:0048364]; shoot system development [GO:0048367]
accD	accD	AccD/PCCB family	fatty acid biosynthetic process [GO:0006633]; malonyl-CoA biosynthetic process [GO:2001295]
ACL5	ACL5	Spermidine/spermine synthase family	auxin polar transport [GO:0009926]; phloem or xylem histogenesis [GO:0010087]; polyamine biosynthetic process [GO:0006596]; xylem vessel member cell differentiation [GO:0048759]
ACO	ACO,LlACO,AsACO,TaACO	Iron/ascorbate-dependent oxidoreductase family	ethylene biosynthetic process [GO:0009693]; fruit ripening [GO:0009835]
ACO2	ACO2,TaACO2	Iron/ascorbate-dependent oxidoreductase family	cellular response to fatty acid [GO:0071398]; cellular response to nitric oxide [GO:0071732]; defense response [GO:0006952]; detection of ethylene stimulus [GO:0009727]; ethylene biosynthetic process [GO:0009693]; positive regulation of seed germination [GO:0010030]
ACO4	TaACO1,MnACO1,ACO1,CsACO1,ACO3	Iron/ascorbate-dependent oxidoreductase family	ethylene biosynthetic process [GO:0009693]; fruit ripening [GO:0009835],cellular response to fatty acid [GO:0071398]; defense response [GO:0006952]; ethylene biosynthetic process [GO:0009693]; fruit ripening [GO:0009835]; response to fungus [GO:0009620]
ACP2	AtACP2,A1,FrA1	Acyl carrier protein (ACP) family
ACP3	AtACP3	Acyl carrier protein (ACP) family
ACP4	AtACP4	Acyl carrier protein (ACP) family	cuticle development [GO:0042335]; fatty acid biosynthetic process [GO:0006633]; systemic acquired resistance [GO:0009627]
ACR3	ACR3	ACR3 family (one gene)
ACS1	RhACS1,NtACS1,MnACS1,CsACS1	Class-I pyridoxal-phosphate-dependent aminotransferase family	ethylene biosynthetic process [GO:0009693]; fruit ripening [GO:0009835]
ACS11	ACS11	Class-I pyridoxal-phosphate-dependent aminotransferase family	ethylene biosynthetic process [GO:0009693]; fruit ripening [GO:0009835]
ACS12	RhACS12	Class-I pyridoxal-phosphate-dependent aminotransferase family	1-aminocyclopropane-1-carboxylate biosynthetic process [GO:0042218]
ACS2	OsACS2,ACS2,RhACS2,ACC1	Class-I pyridoxal-phosphate-dependent aminotransferase family,ACC1 family (one gene),Stephanie Manual Enter	ethylene biosynthetic process [GO:0009693]; fruit ripening [GO:0009835],embryo development ending in seed dormancy [GO:0009793]; fatty acid elongation [GO:0030497]; malonyl-CoA biosynthetic process [GO:2001295]; meristem structural organization [GO:0009933]; primary shoot apical meristem specification [GO:0010072]; response to cytokinin [GO:0009735]; root development [GO:0048364]; shoot system de…
ACS4	ACS4	Class-I pyridoxal-phosphate-dependent aminotransferase family	ethylene biosynthetic process [GO:0009693]; fruit ripening [GO:0009835]
ACS5	ACS5	Class-I pyridoxal-phosphate-dependent aminotransferase family	cell division [GO:0051301]; ethylene biosynthetic process [GO:0009693]; fruit ripening [GO:0009835]; phloem or xylem histogenesis [GO:0010087]; response to cytokinin [GO:0009735]
ACS6	ACS6,ZmACS6	Class-I pyridoxal-phosphate-dependent aminotransferase family	cell division [GO:0051301]; defense response [GO:0006952]; ethylene biosynthetic process [GO:0009693]; fruit ripening [GO:0009835]; phloem or xylem histogenesis [GO:0010087]; response to auxin [GO:0009733]; response to jasmonic acid [GO:0009753]; response to mechanical stimulus [GO:0009612]; response to oxidative stress [GO:0006979]; response to wounding [GO:0009611]
ACT-1	ACT,EsACT,HuACT	Plant acyltransferase family
ACT7	ACT7	Actin family
ACX1	GmACX1	Acyl-CoA oxidase family	fatty acid beta-oxidation [GO:0006635]; fatty acid beta-oxidation using acyl-CoA oxidase [GO:0033540]; jasmonic acid biosynthetic process [GO:0009695]; lipid homeostasis [GO:0055088]; long-chain fatty acid metabolic process [GO:0001676]; response to cadmium ion [GO:0046686]; response to fungus [GO:0009620]; response to wounding [GO:0009611]
ACX4	G6	Acyl-CoA dehydrogenase family	embryo development ending in seed dormancy [GO:0009793]; fatty acid beta-oxidation [GO:0006635]; short-chain fatty acid metabolic process [GO:0046459]
ADAP	ADAP	ARIA-interacting, AP2 domain	DroughtDB Tags: Regulatory Proteins;Gene Expression;Transcription Factors;AP2-Domain
adc	adc	Orn/Lys/Arg decarboxylase class-II family, SpeA subfamily	DroughtDB Tags: Detoxification;Osmolyte Production;Functional Proteins;Enzymes for Osmolyte Biosynthesis
ADC	ADC,PtADC,TcADC,OsADC	Orn/Lys/Arg decarboxylase class-II family, SpeA subfamily	arginine catabolic process [GO:0006527]; putrescine biosynthetic process [GO:0009446]; spermidine biosynthetic process [GO:0008295]
ADC1	ADC1,AtADC1	Orn/Lys/Arg decarboxylase class-II family, SpeA subfamily	arginine catabolic process [GO:0006527]; polyamine biosynthetic process [GO:0006596]; putrescine biosynthetic process from arginine [GO:0033388]; response to cold [GO:0009409]; response to oxidative stress [GO:0006979]; response to salt stress [GO:0009651]; spermidine biosynthetic process [GO:0008295]
ADC2	ADC2,AtADC2	Orn/Lys/Arg decarboxylase class-II family, SpeA subfamily	arginine catabolic process [GO:0006527]; polyamine biosynthetic process [GO:0006596]; putrescine biosynthetic process [GO:0009446]; putrescine biosynthetic process from arginine [GO:0033388]; response to abscisic acid [GO:0009737]; response to cold [GO:0009409]; response to jasmonic acid [GO:0009753]; response to karrikin [GO:0080167]; response to osmotic stress [GO:0006970]; response to oxidativ…
ADF1	OsADF1,SlADF1	Actin-binding proteins ADF family	actin filament depolymerization [GO:0030042]
ADF11	SlADF11	Actin-binding proteins ADF family	actin filament depolymerization [GO:0030042]
ADF12	SlADF10	Actin-binding proteins ADF family	actin filament depolymerization [GO:0030042]; pollen tube growth [GO:0009860]
ADF3	TaADF3,OsADF3,SlADF3	Actin-binding proteins ADF family	actin filament depolymerization [GO:0030042]
ADF6	SlADF6	Actin-binding proteins ADF family	actin filament depolymerization [GO:0030042]
ADF8	SlADF8	Actin-binding proteins ADF family	actin filament depolymerization [GO:0030042]
ADH1	ADH1,AtADH1,ADH,AtADH,NtADH	Zinc-containing alcohol dehydrogenase family, Class-P subfamily	cellular response to hypoxia [GO:0071456]; formaldehyde catabolic process [GO:0046294]; positive regulation of cellular response to hypoxia [GO:1900039]; response to abscisic acid [GO:0009737]; response to cadmium ion [GO:0046686]; response to caffeine [GO:0031000]; response to cold [GO:0009409]; response to estradiol [GO:0032355]; response to flooding [GO:0009413]; response to hydrogen peroxide …
ADH2	ZmFDH1	D-isomer specific 2-hydroxyacid dehydrogenase family, FDH subfamily,Zinc-containing alcohol dehydrogenase family, Class-III subfamily	formate catabolic process [GO:0042183]; response to cadmium ion [GO:0046686],ethanol oxidation [GO:0006069]; formaldehyde catabolic process [GO:0046294]
ADO3	OsFKF1,FKF1	ADAGIO family	circadian rhythm [GO:0007623]; flower development [GO:0009908]; negative regulation of cellulose biosynthetic process [GO:2001007]; positive regulation of flower development [GO:0009911]; protein-chromophore linkage [GO:0018298]; protein ubiquitination [GO:0016567]; regulation of gene expression [GO:0010468]; regulation of transcription, DNA-templated [GO:0006355]; response to blue light [GO:0009…
ADR1	ADR1	Disease resistance NB-LRR family	defense response to bacterium [GO:0042742]; plant-type hypersensitive response [GO:0009626]; response to karrikin [GO:0080167]; response to other organism [GO:0051707]; response to water deprivation [GO:0009414]
AFB2	OsAFB2,AsAFB2,AFB2	AFB2 family (one gene)	auxin-activated signaling pathway [GO:0009734]; defense response [GO:0006952]; pollen maturation [GO:0010152]; protein ubiquitination [GO:0016567]; stamen development [GO:0048443]
AFP1	AFP	Ninja family	abscisic acid-activated signaling pathway [GO:0009738]; negative regulation of transcription, DNA-templated [GO:0045892]; response to abscisic acid [GO:0009737]
AG	AG	AG family (one gene)	cell differentiation [GO:0030154]; multicellular organism development [GO:0007275]; plant ovule development [GO:0048481]; positive regulation of transcription by RNA polymerase II [GO:0045944]
AG1	MADS3	MADS3 family (one gene),AG1 family (one gene)	cell differentiation [GO:0030154]; multicellular organism development [GO:0007275]; plant ovule development [GO:0048481]; positive regulation of transcription by RNA polymerase II [GO:0045944]; specification of stamen identity [GO:0010097],positive regulation of transcription by RNA polymerase II [GO:0045944]
AGD3	SFC	AGD3 family (one gene)	endocytosis [GO:0006897]; leaf morphogenesis [GO:0009965]; phloem or xylem histogenesis [GO:0010087]; response to auxin [GO:0009733]; xylem and phloem pattern formation [GO:0010051]
AGL1	AGL1	AGL1 family (one gene)	multicellular organism development [GO:0007275]; plant ovule development [GO:0048481]; positive regulation of transcription by RNA polymerase II [GO:0045944]; regulation of growth [GO:0040008]
AGL11	STK	AGL11 family (one gene)	multicellular organism development [GO:0007275]; plant ovule development [GO:0048481]; positive regulation of transcription by RNA polymerase II [GO:0045944]
AGL24	AGL24	AGL24 family (one gene)	cell differentiation [GO:0030154]; floral whorl development [GO:0048438]; maintenance of inflorescence meristem identity [GO:0010077]; multicellular organism development [GO:0007275]; positive regulation of transcription, DNA-templated [GO:0045893]; positive regulation of transcription by RNA polymerase II [GO:0045944]; positive regulation of vernalization response [GO:0010220]; regulation of tim…
AGL27	MdFK1	AGL27 family (one gene)	flower development [GO:0009908]; multicellular organism development [GO:0007275]; photoperiodism, flowering [GO:0048573]; regulation of flower development [GO:0009909]; regulation of transcription, DNA-templated [GO:0006355]
AGL8	GmFUL	AGL8 family (one gene)	cell differentiation [GO:0030154]; developmental growth involved in morphogenesis [GO:0060560]; flower development [GO:0009908]; fruit development [GO:0010154]; maintenance of inflorescence meristem identity [GO:0010077]; multicellular organism development [GO:0007275]; positive regulation of flower development [GO:0009911]; positive regulation of transcription by RNA polymerase II [GO:0045944]
AGO	AGO,ZmAGO	Argonaute family, Ago subfamily	Drought DB Tags: Regulatory Proteins;Gene Expression;miRNA
AGO1C	AGO1	Argonaute family, Ago subfamily	gene silencing by RNA [GO:0031047],Drought DB Tags: Regulatory Proteins;Gene Expression;miRNA
AGO4	ZmAGO4	Argonaute family, Ago subfamily	chromatin silencing [GO:0006342]; chromatin silencing by small RNA [GO:0031048]; defense response to bacterium, incompatible interaction [GO:0009816]; defense response to virus [GO:0051607]; DNA methylation [GO:0006306]; gene silencing [GO:0016458]; histone H3-K9 methylation [GO:0051567]; modulation by virus of host process [GO:0019048]; production of siRNA involved in chromatin silencing by smal…
AGO9	ZmAGO9	Argonaute family, Ago subfamily	defense response to virus [GO:0051607]; gene silencing by RNA [GO:0031047]; megasporocyte differentiation [GO:1904159]; megasporogenesis [GO:0009554]; negative regulation of transposition [GO:0010529]; plant ovule development [GO:0048481]; regulation of translation [GO:0006417]
AGPL3	MaAPL3,AGPL3	Bacterial/plant glucose-1-phosphate adenylyltransferase family	glycogen biosynthetic process [GO:0005978]; starch biosynthetic process [GO:0019252]
AGPS1	MaAPS1	APS1/VSP family,Bacterial/plant glucose-1-phosphate adenylyltransferase family	glycogen biosynthetic process [GO:0005978]; photoperiodism, flowering [GO:0048573]; starch biosynthetic process [GO:0019252],glycogen biosynthetic process [GO:0005978]; starch biosynthetic process [GO:0019252]
AGPS2	AGPS2	Bacterial/plant glucose-1-phosphate adenylyltransferase family	glycogen biosynthetic process [GO:0005978]; starch biosynthetic process [GO:0019252]; starch metabolic process [GO:0005982]
AHA1	AHA1	Cation transport ATPase (P-type) (TC 3.A.3) family, Type IIIA subfamily	proton export across plasma membrane [GO:0120029]; proton transmembrane transport [GO:1902600]; regulation of intracellular pH [GO:0051453]; regulation of stomatal movement [GO:0010119]; response to abscisic acid [GO:0009737]; response to water deprivation [GO:0009414]; stomatal opening [GO:1990069]
AHA2	AHA2	Cation transport ATPase (P-type) (TC 3.A.3) family, Type IIIA subfamily	proton export across plasma membrane [GO:0120029]; proton transmembrane transport [GO:1902600]; regulation of intracellular pH [GO:0051453]
AHG1	AHG1	PP2C family	response to abscisic acid [GO:0009737]
AHK1	AHK1	AHK1 family (one gene)	abscisic acid-activated signaling pathway [GO:0009738]; response to osmotic stress [GO:0006970]; response to water deprivation [GO:0009414]; seed maturation [GO:0010431]; stomatal complex patterning [GO:0010375]
AHK2	AHK2	AHK2 family (one gene)	cellular response to abscisic acid stimulus [GO:0071215]; cellular response to cold [GO:0070417]; cytokinin-activated signaling pathway [GO:0009736]; multicellular organism development [GO:0007275]; negative regulation of iron ion transport [GO:0034757]; phloem or xylem histogenesis [GO:0010087]; protein dephosphorylation [GO:0006470]; regulation of chlorophyll catabolic process [GO:0010271]; reg…
AHK3	AHK3	AHK3 family (one gene)	cellular response to abscisic acid stimulus [GO:0071215]; cellular response to cold [GO:0070417]; cellular response to phosphate starvation [GO:0016036]; cellular response to sucrose stimulus [GO:0071329]; cytokinin-activated signaling pathway [GO:0009736]; defense response to bacterium [GO:0042742]; leaf senescence [GO:0010150]; negative regulation of iron ion transport [GO:0034757]; nucleoside …
AHK4	AHK4,CRE1	AHK4 family (one gene)	carbohydrate homeostasis [GO:0033500]; cellular response to phosphate starvation [GO:0016036]; cellular response to sucrose stimulus [GO:0071329]; cytokinin-activated signaling pathway [GO:0009736]; defense response to bacterium [GO:0042742]; embryonic root morphogenesis [GO:0010086]; nucleoside metabolic process [GO:0009116]; osmosensory signaling pathway [GO:0007231]; phosphorelay signal transd…
AHL	AHL	Inositol monophosphatase superfamily	inositol phosphate dephosphorylation [GO:0046855]; phosphatidylinositol phosphorylation [GO:0046854]; sulfate assimilation [GO:0000103]
AHL1	OsAHL1	AHL1 family (one gene)
AHL10	AHL10	AHL10 family (one gene)
AHL16	AHL16	AHL16 family (one gene)	negative regulation of histone acetylation [GO:0035067]; negative regulation of transposition [GO:0010529]; pollen wall assembly [GO:0010208]; positive regulation of histone H3-K9 dimethylation [GO:1900111]; vegetative to reproductive phase transition of meristem [GO:0010228]
AHL25	HRC	AHL25 family (one gene)	negative regulation of gibberellic acid mediated signaling pathway [GO:0009938]; vegetative to reproductive phase transition of meristem [GO:0010228]
AHP1	HPT1	UbiA prenyltransferase family,AHP1 family (one gene)	cell wall organization [GO:0071555]; phloem sucrose loading [GO:0009915]; regulation of defense response [GO:0031347]; response to temperature stimulus [GO:0009266]; unsaturated fatty acid biosynthetic process [GO:0006636]; vitamin E biosynthetic process [GO:0010189],cytokinin-activated signaling pathway [GO:0009736]; phosphorelay signal transduction system [GO:0000160]; phosphorylation [GO:00163…
AHP2	HP1,ScHP1,AHP2	AHP2 family (one gene)	cytokinin-activated signaling pathway [GO:0009736]; phosphorelay signal transduction system [GO:0000160]; phosphorylation [GO:0016310]; positive regulation of cytokinin-activated signaling pathway [GO:0080038],antipodal cell differentiation [GO:0009557]; cytokinin-activated signaling pathway [GO:0009736]; embryo sac egg cell differentiation [GO:0009560]; phosphorelay signal transduction system [G…
AHP3	AHP3	AHP3 family (one gene)	antipodal cell differentiation [GO:0009557]; cytokinin-activated signaling pathway [GO:0009736]; embryo sac egg cell differentiation [GO:0009560]; phosphorelay signal transduction system [GO:0000160]; phosphorylation [GO:0016310]
AHP5	AHP5	AHP5 family (one gene)	antipodal cell differentiation [GO:0009557]; cytokinin-activated signaling pathway [GO:0009736]; embryo sac egg cell differentiation [GO:0009560]; phosphorelay signal transduction system [GO:0000160]; phosphorylation [GO:0016310]
AHT1	AHT1	Plant acyltransferase family
AIB	AtAIB	AIB family (one gene)	abscisic acid-activated signaling pathway [GO:0009738]; negative regulation of gene expression [GO:0010629]; regulation of transcription, DNA-templated [GO:0006355]; response to abscisic acid [GO:0009737]; response to wounding [GO:0009611]
AIH	AIH,AtAIH	Agmatine deiminase family	polyamine biosynthetic process [GO:0006596]; putrescine biosynthetic process from arginine [GO:0033388]
AIL1	AIL1	AP2/ERF transcription factor family, AP2 subfamily	ethylene-activated signaling pathway [GO:0009873]
AIP1	CaAIP1	PP2C family	negative regulation of abscisic acid-activated signaling pathway [GO:0009788]; negative regulation of seed dormancy process [GO:1902039]; positive regulation of gibberellic acid mediated signaling pathway [GO:0009939]; positive regulation of seed germination [GO:0010030]; regulation of growth [GO:0040008]; release of seed from dormancy [GO:0048838]
AIR1	CaAIR1,OsAIR1,AIR1	Plant LTP family, PEARLI1 subfamily	lateral root morphogenesis [GO:0010102]; response to auxin [GO:0009733]
AIR3	AIR3	Peptidase S8 family	lateral root morphogenesis [GO:0010102]; response to auxin [GO:0009733]
AIRP1	AtAIRP1	AIRP1 family (one gene)	positive regulation of abscisic acid-activated signaling pathway [GO:0009789]; positive regulation of hydrogen peroxide biosynthetic process [GO:0010729]
AIRP2	AtAIRP2	AIRP2 family (one gene)	positive regulation of abscisic acid-activated signaling pathway [GO:0009789]; response to abscisic acid [GO:0009737]; response to salt stress [GO:0009651]; ubiquitin-dependent protein catabolic process [GO:0006511]
AK1	AK	Aspartokinase family	cellular amino acid biosynthetic process [GO:0008652]; homoserine biosynthetic process [GO:0009090]; lysine biosynthetic process via diaminopimelate [GO:0009089]; threonine biosynthetic process [GO:0009088]
AKRP	AKR,JcAKR	AKRP family (one gene)
AKT2	AKT2,HvAKT2,AKT3	Potassium channel family, Plant (TC 1.A.1.4) subfamily	regulation of ion transmembrane transport [GO:0034765]; regulation of membrane potential [GO:0042391]; response to abscisic acid [GO:0009737]
AL5	AL5	Alfin family	chromatin organization [GO:0006325]; regulation of transcription, DNA-templated [GO:0006355]; response to salt stress [GO:0009651]; response to water deprivation [GO:0009414]
AL6	AL6	Alfin family	cellular response to phosphate starvation [GO:0016036]; chromatin organization [GO:0006325]; metal ion homeostasis [GO:0055065]; regulation of transcription, DNA-templated [GO:0006355]; root hair elongation [GO:0048767]
ALDH	ALDH,GmALDH,MeALDH,ZmALDH,BrALDH,MdALDH,CsALDH	Aldehyde dehydrogenase family	cellular aldehyde metabolic process [GO:0006081]
ALDH10A8	ALDH10A8	Aldehyde dehydrogenase family	glycine betaine biosynthetic process from choline [GO:0019285]; response to salt stress [GO:0009651]; response to water deprivation [GO:0009414]
ALDH12A1	CsALDH12A1,P5CDH,AtP5CDH	Aldehyde dehydrogenase family	proline catabolic process to glutamate [GO:0010133]; proline metabolic process [GO:0006560]; reactive oxygen species metabolic process [GO:0072593]; response to salt stress [GO:0009651]
ALDH22A1	ZmALDH22A1	Aldehyde dehydrogenase family
ALDH3H1	ALDH4	Aldehyde dehydrogenase family	cellular aldehyde metabolic process [GO:0006081]; response to abscisic acid [GO:0009737]; response to desiccation [GO:0009269]; response to salt stress [GO:0009651]
ALDH7B4	ALDH7B4	Aldehyde dehydrogenase family	cellular aldehyde metabolic process [GO:0006081]; response to abscisic acid [GO:0009737]; response to desiccation [GO:0009269]; response to salt stress [GO:0009651]
ALI1	ALI1	Metallothionein superfamily, Type 15 family
ALMT1	AtALMT1	Aromatic acid exporter (TC 2.A.85) family	malate transport [GO:0015743]
ALMT12	AtALMT12,AtQUAC1	Aromatic acid exporter (TC 2.A.85) family	malate transport [GO:0015743]; stomatal movement [GO:0010118]; sulfate transport [GO:0008272]
ALN	ALN	Metallo-dependent hydrolases superfamily, Allantoinase family	allantoin catabolic process [GO:0000256]; cellular response to nitrogen starvation [GO:0006995]; purine nucleobase catabolic process [GO:0006145]; ureide catabolic process [GO:0010136]
ALR	VrALR	aldose/aldehyde reductase	DroughtDB Function: aldose/aldehyde reductase
ALS3	AtALS3	UPF0014 family	response to aluminum ion [GO:0010044]
AMP	AMP	AMP family (one gene)	defense response to bacterium [GO:0042742]; defense response to fungus [GO:0050832]; killing of cells of other organism [GO:0031640]
AMP1	HPT,IbHPT,PT,CaAMP1,AMP1	Peptidase M28 family, M28B subfamily	embryo development ending in seed dormancy [GO:0009793]; flower development [GO:0009908]; leaf vascular tissue pattern formation [GO:0010305]; meristem development [GO:0048507]; photomorphogenesis [GO:0009640]; proteolysis [GO:0006508]; regulation of floral meristem growth [GO:0010080]; regulation of inflorescence meristem growth [GO:0010081]; regulation of root meristem growth [GO:0010082]; root…
AMS1	ADS	Terpene synthase family	response to gibberellin [GO:0009739]; response to reactive oxygen species [GO:0000302]; sesquiterpene metabolic process [GO:0051761]
AMY3	GmAMY3,AMY3	Glycosyl hydrolase 13 family	starch catabolic process [GO:0005983]
AN	AN	D-isomer specific 2-hydroxyacid dehydrogenase family, Plant AN subfamily	floral organ morphogenesis [GO:0048444]; fruit morphogenesis [GO:0048530]; inductive cell-cell signaling [GO:0031129]; leaf morphogenesis [GO:0009965]; microtubule cytoskeleton organization [GO:0000226]; monopolar cell growth [GO:0042814]; nuclear migration [GO:0007097]; oxidation-reduction process [GO:0055114]; regulation of cell shape [GO:0008360]; regulation of epidermal cell differentiation […
Ann	Ann	Annexin family	DroughtDB Tags: Growth Control
ANN	EpANN	Annexin family	DroughtDB Tags: Growth Control
ANN1	OsANN1	Annexin (TC 1.A.31.1) family	calcium ion transmembrane transport [GO:0070588]; phloem sucrose unloading [GO:0110128]; primary root development [GO:0080022]; response to abscisic acid [GO:0009737]; response to cadmium ion [GO:0046686]; response to cold [GO:0009409]; response to heat [GO:0009408]; response to osmotic stress [GO:0006970]; response to salt stress [GO:0009651]; response to water deprivation [GO:0009414]
ANP1	ANP1	Protein kinase superfamily, STE Ser/Thr protein kinase family, MAP kinase kinase kinase subfamily	activation of protein kinase activity [GO:0032147]; protein autophosphorylation [GO:0046777]; regulation of mitotic cell cycle [GO:0007346]; response to oxidative stress [GO:0006979]; signal transduction by protein phosphorylation [GO:0023014]; stress-activated protein kinase signaling cascade [GO:0031098]
ANR1	ANR1	ANR1 family (one gene)	cellular response to nitrate [GO:0071249]; lateral root development [GO:0048527]; positive regulation of transcription by RNA polymerase II [GO:0045944]; response to nitrate [GO:0010167]; response to nutrient [GO:0007584]
ANT	ANT,AtANT	AP2/ERF transcription factor family, AP2 subfamily	cell differentiation [GO:0030154]; flower development [GO:0009908]; glucosinolate metabolic process [GO:0019760]; maintenance of shoot apical meristem identity [GO:0010492]; regulation of cell population proliferation [GO:0042127]
ANT1	AAC	Mitochondrial carrier (TC 2.A.29) family
AOC	HB,AOC,LmAOC,AOC3	Allene oxide cyclase family	auxin-activated signaling pathway [GO:0009734]; circadian rhythm [GO:0007623]; defense response to fungus [GO:0050832]; developmental vegetative growth [GO:0080186]; flower development [GO:0009908]; induced systemic resistance, jasmonic acid mediated signaling pathway [GO:0009864]; jasmonic acid biosynthetic process [GO:0009695]; photoperiodism, flowering [GO:0048573]; positive regulation of defe…
AOC1	AOC1	Allene oxide cyclase family	jasmonic acid biosynthetic process [GO:0009695]
AOG	NtAOG,CsAOG	UDP-glycosyltransferase family
AOX4	IM,PTOX	Alternative oxidase family	carotenoid biosynthetic process [GO:0016117]; plastid organization [GO:0009657]
AP	AP	Adaptor complexes small subunit family, TF	Stephanie Manual Enter
AP1	AP1,PvAP1,GmAP1	AP1 family (one gene)	cell differentiation [GO:0030154]; floral meristem determinacy [GO:0010582]; flower development [GO:0009908]; meristem structural organization [GO:0009933]; multicellular organism development [GO:0007275]; positive regulation of transcription, DNA-templated [GO:0045893]; positive regulation of transcription by RNA polymerase II [GO:0045944]
AP2	AP2,AhAP2,PgAP2,LlAP2,TcAP2,NtAP2	AP2/ERF transcription factor family, AP2 subfamily	cell differentiation [GO:0030154]; flower development [GO:0009908]; meristem maintenance [GO:0010073]; plant ovule development [GO:0048481]; seed development [GO:0048316]; specification of floral organ identity [GO:0010093]
AP2-4	ZmGL15,GL15	AP2/ERF transcription factor family, AP2 subfamily	regulation of flower development [GO:0009909]; regulation of seed development [GO:0080050]
AP24	AhAP24	Thaumatin family	defense response [GO:0006952]; response to biotic stimulus [GO:0009607]
AP37	AP37,OsAP37,SbAP37	Peptidase A1 family	protein catabolic process [GO:0030163]; proteolysis [GO:0006508]; regulation of programmed cell death [GO:0043067]
APA1	APA1	Peptidase A1 family	lipid metabolic process [GO:0006629]; protein catabolic process [GO:0030163]; proteolysis [GO:0006508]
APK1	AaAPK1	APS kinase family	cysteine biosynthetic process [GO:0019344]; hydrogen sulfide biosynthetic process [GO:0070814]; phosphorylation [GO:0016310]; sulfate assimilation [GO:0000103]
APL	APL	MYB-CC family	flower development [GO:0009908]; phloem development [GO:0010088]; positive regulation of transcription, DNA-templated [GO:0045893]; regulation of transcription, DNA-templated [GO:0006355]; xylem development [GO:0010089]
APRR1	OsTOC1,TOC1	ARR-like family	circadian rhythm [GO:0007623]; circumnutation [GO:0010031]; flower development [GO:0009908]; negative regulation of gene expression [GO:0010629]; phosphorelay signal transduction system [GO:0000160]; regulation of gene expression [GO:0010468]; regulation of transcription, DNA-templated [GO:0006355]; transcription, DNA-templated [GO:0006351]
APRR2	APRR2	ARR-like family	phosphorelay signal transduction system [GO:0000160]; positive regulation of transcription, DNA-templated [GO:0045893]
APS1	APS	Bacterial/plant glucose-1-phosphate adenylyltransferase family	glycogen biosynthetic process [GO:0005978]; photoperiodism, flowering [GO:0048573]; starch biosynthetic process [GO:0019252]
APUM5	APUM5	APUM5 family (one gene)	3'-UTR-mediated mRNA destabilization [GO:0061158]; defense response to virus [GO:0051607]; drought recovery [GO:0009819]; posttranscriptional regulation of gene expression [GO:0010608]; response to osmotic stress [GO:0006970]; response to salt stress [GO:0009651]
APX2	APX2,OsAPX2,CsAPX2	Peroxidase family, Ascorbate peroxidase subfamily	cellular response to oxidative stress [GO:0034599]; hydrogen peroxide catabolic process [GO:0042744]; response to reactive oxygen species [GO:0000302],cellular response to oxidative stress [GO:0034599]; hydrogen peroxide catabolic process [GO:0042744]; response to oxidative stress [GO:0006979]; response to reactive oxygen species [GO:0000302],DroughtDB Tags: Regulatory Proteins;Gene Expression;Tr…
APX3	APX3,APX,AmAPX,NtAPX,CsAPX,AtAPX,HbAPX,MsAPX,StAPX,TaAPX,GhAPX	Peroxidase family, Ascorbate peroxidase subfamily	cellular response to oxidative stress [GO:0034599]; hydrogen peroxide catabolic process [GO:0042744]; response to oxidative stress [GO:0006979]; response to reactive oxygen species [GO:0000302]
APX5	APX5	Peroxidase family, Ascorbate peroxidase subfamily	cellular response to oxidative stress [GO:0034599]; hydrogen peroxide catabolic process [GO:0042744]; response to reactive oxygen species [GO:0000302]
APX6	APX6	Peroxidase family, Ascorbate peroxidase subfamily	cellular response to oxidative stress [GO:0034599]; hydrogen peroxide catabolic process [GO:0042744]; response to reactive oxygen species [GO:0000302]; seed germination [GO:0009845]; seed maturation [GO:0010431]
APX8	APX8	Peroxidase family, Ascorbate peroxidase subfamily	cellular response to oxidative stress [GO:0034599]; defense response [GO:0006952]; hydrogen peroxide catabolic process [GO:0042744]; response to reactive oxygen species [GO:0000302]
AQP	AQP,RpAQP,VsAQP,MaAQP,PgAQP,CsAQP	MIP/aquaporin, PIP1 plasma membrane aquaporin	DroughtDB Tags: Ion and Osmotic Homeostasis;Functional Proteins;Channels and Transporters;Water Channels
AQP1	TcAQP1,SpAQP1,AQP1,NtAQP1	MIP/aquaporin, PIP1 plasma membrane aquaporin	DroughtDB Tags: Ion and Osmotic Homeostasis;Functional Proteins;Channels and Transporters;Water Channels
ARAC10	ROP11	Small GTPase superfamily, Rho family	actin cytoskeleton organization [GO:0030036]; actin filament organization [GO:0007015]; cortical cytoskeleton organization [GO:0030865]; establishment or maintenance of cell polarity [GO:0007163]; negative regulation of abscisic acid-activated signaling pathway [GO:0009788]; plant-type cell wall organization [GO:0009664]; regulation of actin cytoskeleton organization [GO:0032956]; regulation of c…
ARAC3	ROP6	Small GTPase superfamily, Rho family	actin cytoskeleton organization [GO:0030036]; actin filament organization [GO:0007015]; auxin-activated signaling pathway [GO:0009734]; cortical cytoskeleton organization [GO:0030865]; establishment or maintenance of cell polarity [GO:0007163]; positive gravitropism [GO:0009958]; regulation of actin cytoskeleton organization [GO:0032956]; regulation of auxin mediated signaling pathway [GO:0010928…
ARAC4	ROP2	Small GTPase superfamily, Rho family	actin cytoskeleton organization [GO:0030036]; actin filament organization [GO:0007015]; cell morphogenesis [GO:0000902]; cortical cytoskeleton organization [GO:0030865]; establishment or maintenance of cell polarity [GO:0007163]; microtubule cytoskeleton organization [GO:0000226]; pollen tube growth [GO:0009860]; regulation of actin cytoskeleton organization [GO:0032956]; regulation of cell shape…
ARAC8	ROP10	Small GTPase superfamily, Rho family	abscisic acid-activated signaling pathway [GO:0009738]; actin cytoskeleton organization [GO:0030036]; actin filament organization [GO:0007015]; cortical cytoskeleton organization [GO:0030865]; establishment or maintenance of cell polarity [GO:0007163]; negative regulation of abscisic acid-activated signaling pathway [GO:0009788]; regulation of actin cytoskeleton organization [GO:0032956]; regulat…
ARAC9	ROP8	Small GTPase superfamily, Rho family	actin cytoskeleton organization [GO:0030036]; actin filament organization [GO:0007015]; cortical cytoskeleton organization [GO:0030865]; establishment or maintenance of cell polarity [GO:0007163]; regulation of actin cytoskeleton organization [GO:0032956]; regulation of cell shape [GO:0008360]; Rho protein signal transduction [GO:0007266]
ARD1	OsARD1	Acireductone dioxygenase (ARD) family	L-methionine salvage from methylthioadenosine [GO:0019509]; methionine metabolic process [GO:0006555]
ARD4	OsARD4	Acireductone dioxygenase (ARD) family	L-methionine salvage from methylthioadenosine [GO:0019509]; methionine metabolic process [GO:0006555]
AREB	AREB,SiAREB,NtAREB,SlAREB,OsAREB	BZIP family, ABI5 subfamily	DroughtDB Tags: Regulatory Proteins;Gene Expression;Transcription Factors;bZIP
AREB1	AREB1,SiAREB1,AhAREB1,SlAREB1,SpAREB1,ScAREB1,OsAREB1,GmAREB1,AtAREB1	BZIP family, ABI5 subfamily	DroughtDB Tags: Regulatory Proteins;Gene Expression;Transcription Factors;bZIP
ARF	ARF,BpARF,NtARF,SlARF,GmARF,SaARF,SbARF,JcARF,OsARF	Small GTPase superfamily, Arf family	intracellular protein transport [GO:0006886]; protein ADP-ribosylation [GO:0006471]; vesicle-mediated transport [GO:0016192]
ARF12	ARF12	ARF family	auxin-activated signaling pathway [GO:0009734]
ARF23	BpARF1,NtARF1,ARF1	Small GTPase superfamily, Arf family,ARF family,TFDB_GO: ARF transcription factor	auxin-activated signaling pathway [GO:0009734]; intracellular protein transport [GO:0006886]; regulation of auxin metabolic process [GO:0090354]; response to brefeldin A [GO:0031001]; vesicle-mediated transport [GO:0016192]; vesicle-mediated transport to the plasma membrane [GO:0098876],auxin-activated signaling pathway [GO:0009734]; regulation of transcription, DNA-templated [GO:0006355],TFDB_GO…
ARF2A	NtARF2,ARF2,ZmARF2	ARF family,TFDB_GO: ARF transcription factor	auxin-activated signaling pathway [GO:0009734]; floral organ abscission [GO:0010227]; fruit dehiscence [GO:0010047]; leaf senescence [GO:0010150]; negative regulation of cell population proliferation [GO:0008285]; negative regulation of transcription, DNA-templated [GO:0045892]; plant ovule development [GO:0048481]; positive regulation of flower development [GO:0009911]; positive regulation of po…
ARF3	ZmARF3	ARF family	abaxial cell fate specification [GO:0010158]; auxin-activated signaling pathway [GO:0009734]; auxin metabolic process [GO:0009850]; floral meristem determinacy [GO:0010582]; positive regulation of response to water deprivation [GO:1902584]; response to auxin [GO:0009733]; vegetative phase change [GO:0010050]
ARF5	ARF5,IbARF5,MdIAA24,MP,TaMP	ARF family	auxin-activated signaling pathway [GO:0009734]; embryo development ending in seed dormancy [GO:0009793]; flower development [GO:0009908]; leaf vascular tissue pattern formation [GO:0010305]; longitudinal axis specification [GO:0009942]; meristem development [GO:0048507]; regulation of transcription, DNA-templated [GO:0006355]; response to auxin [GO:0009733]; root development [GO:0048364]; xylem a…
ARF6	ARF6	ARF family	auxin-activated signaling pathway [GO:0009734]; flower development [GO:0009908]; response to auxin [GO:0009733]
ARF7	NtIAA25	ARF family	auxin-activated signaling pathway [GO:0009734]; blue light signaling pathway [GO:0009785]; gravitropism [GO:0009630]; lateral root development [GO:0048527]; lateral root formation [GO:0010311]; leaf development [GO:0048366]; phototropism [GO:0009638]; positive regulation of transcription, DNA-templated [GO:0045893]; response to auxin [GO:0009733]; response to ethylene [GO:0009723]
ARF8	NtARF8	ARF family	auxin-activated signaling pathway [GO:0009734]; flower development [GO:0009908]; response to auxin [GO:0009733]
ARG2	ARG2	ARG2 family (one gene)
ARGAH1	ARGAH1	Arginase family	arginine catabolic process [GO:0006527]; defense response to bacterium [GO:0042742]; putrescine biosynthetic process from arginine, using agmatinase [GO:0033389]; urea cycle [GO:0000050]
ARGAH2	ARGAH2,AtARGAH2	Arginase family	defense response to fungus [GO:0050832]; ornithine metabolic process [GO:0006591]; proline metabolic process [GO:0006560]; putrescine biosynthetic process [GO:0009446]; putrescine biosynthetic process from arginine, using agmatinase [GO:0033389]; putrescine metabolic process [GO:0009445]; tyrosine metabolic process [GO:0006570]; urea cycle [GO:0000050]
ARI8	ARI8	RBR family, Ariadne subfamily	positive regulation of proteasomal ubiquitin-dependent protein catabolic process [GO:0032436]; protein polyubiquitination [GO:0000209]; ubiquitin-dependent protein catabolic process [GO:0006511]
ARIA	ARIA	ARIA family (one gene)	negative regulation of seed germination [GO:0010187]; protein ubiquitination [GO:0016567]; response to abscisic acid [GO:0009737]; response to salt stress [GO:0009651]
ARID3	OsARID3	Small heat shock protein (HSP20) family	chromatin silencing [GO:0006342]; regulation of transcription, DNA-templated [GO:0006355]
ARL	ARL,AtARL	Plant organ size related (OSR) protein family	multicellular organism development [GO:0007275]; multidimensional cell growth [GO:0009825]; organ growth [GO:0035265]; positive regulation of organ growth [GO:0046622]; response to brassinosteroid [GO:0009741]
ARP	ARP,REF	DNA repair enzymes AP/ExoA family	base-excision repair [GO:0006284]; nucleotide-excision repair, DNA incision [GO:0033683]; positive regulation of transcription, DNA-templated [GO:0045893]
ARP3	OsDIS1,TaDIS1,CaDIS1	Actin family, ARP3 subfamily	actin filament organization [GO:0007015]; Arp2/3 complex-mediated actin nucleation [GO:0034314]; cell morphogenesis [GO:0000902]; multicellular organism development [GO:0007275]; multidimensional cell growth [GO:0009825]; trichome morphogenesis [GO:0010090]
ARPC5A	CRK,TaCRK	ARPC5 family	actin cytoskeleton organization [GO:0030036]; actin filament organization [GO:0007015]; actin filament polymerization [GO:0030041]; Arp2/3 complex-mediated actin nucleation [GO:0034314]; multidimensional cell growth [GO:0009825]; trichome morphogenesis [GO:0010090]
ARR1	ARR1	ARR family, Type-B subfamily	axillary shoot meristem initiation [GO:0090506]; cellular response to cytokinin stimulus [GO:0071368]; cytokinin-activated signaling pathway [GO:0009736]; maintenance of shoot apical meristem identity [GO:0010492]; primary root development [GO:0080022]; regulation of anthocyanin metabolic process [GO:0031537]; regulation of chlorophyll biosynthetic process [GO:0010380]; regulation of cytokinin-ac…
ARR10	ARR10	ARR family, Type-B subfamily	cellular response to cytokinin stimulus [GO:0071368]; cytokinin-activated signaling pathway [GO:0009736]; maintenance of shoot apical meristem identity [GO:0010492]; primary root development [GO:0080022]; regulation of anthocyanin metabolic process [GO:0031537]; regulation of chlorophyll biosynthetic process [GO:0010380]; regulation of cytokinin-activated signaling pathway [GO:0080036]; regulatio…
ARR11	ARR11	ARR family, Type-B subfamily	cytokinin-activated signaling pathway [GO:0009736]; regulation of abscisic acid-activated signaling pathway [GO:0009787]; regulation of jasmonic acid mediated signaling pathway [GO:2000022]; regulation of root meristem growth [GO:0010082]; regulation of salicylic acid mediated signaling pathway [GO:2000031]; response to cytokinin [GO:0009735]
ARR12	ARR12	ARR family, Type-B subfamily	cellular response to cytokinin stimulus [GO:0071368]; cytokinin-activated signaling pathway [GO:0009736]; maintenance of shoot apical meristem identity [GO:0010492]; primary root development [GO:0080022]; regulation of anthocyanin metabolic process [GO:0031537]; regulation of chlorophyll biosynthetic process [GO:0010380]; regulation of cytokinin-activated signaling pathway [GO:0080036]; regulatio…
ARR15	ARR15	ARR family, Type-A subfamily	cytokinin-activated signaling pathway [GO:0009736]; regulation of transcription, DNA-templated [GO:0006355]; response to cytokinin [GO:0009735]
ARR22	ARR22	ARR family, Type-A subfamily	cytokinin-activated signaling pathway [GO:0009736]; phosphorelay signal transduction system [GO:0000160]; regulation of transcription, DNA-templated [GO:0006355]
ARR24	ARR24	ARR family, Type-A subfamily	cytokinin-activated signaling pathway [GO:0009736]; phosphorelay signal transduction system [GO:0000160]
ARR4	ARR4	ARR family, Type-A subfamily	circadian rhythm [GO:0007623]; cytokinin-activated signaling pathway [GO:0009736]; embryo development ending in seed dormancy [GO:0009793]; protein autophosphorylation [GO:0046777]; red or far-red light signaling pathway [GO:0010017]; regulation of transcription, DNA-templated [GO:0006355]; response to cytokinin [GO:0009735]; response to red light [GO:0010114]
ARR5	ARR5	ARR family, Type-A subfamily	circadian rhythm [GO:0007623]; cytokinin-activated signaling pathway [GO:0009736]; regulation of transcription, DNA-templated [GO:0006355]; response to cytokinin [GO:0009735]; response to red light [GO:0010114]
ARR7	ARR7	ARR family, Type-A subfamily	cytokinin-activated signaling pathway [GO:0009736]; regulation of transcription, DNA-templated [GO:0006355]; response to chitin [GO:0010200]; response to cytokinin [GO:0009735]; stem cell population maintenance [GO:0019827]
ARR8	ARR8	ARR family, Type-A subfamily	circadian rhythm [GO:0007623]; cytokinin-activated signaling pathway [GO:0009736]; phosphorelay signal transduction system [GO:0000160]; regulation of transcription, DNA-templated [GO:0006355]
ARSA1	AS1	AS1 family (one gene),ArsA ATPase family	asymmetric cell division [GO:0008356]; defense response to bacterium [GO:0042742]; defense response to fungus [GO:0050832]; flower development [GO:0009908]; leaf formation [GO:0010338]; leaf morphogenesis [GO:0009965]; negative regulation of transcription, DNA-templated [GO:0045892]; polarity specification of adaxial/abaxial axis [GO:0009944]; regulation of innate immune response [GO:0045088]; re…
AS1	NbPHAN	AS1 family (one gene)	asymmetric cell division [GO:0008356]; defense response to bacterium [GO:0042742]; defense response to fungus [GO:0050832]; flower development [GO:0009908]; leaf formation [GO:0010338]; leaf morphogenesis [GO:0009965]; negative regulation of transcription, DNA-templated [GO:0045892]; polarity specification of adaxial/abaxial axis [GO:0009944]; regulation of innate immune response [GO:0045088]; re…
ASF1A	SP7	ASF1 family	cell division [GO:0051301]; chromatin assembly or disassembly [GO:0006333]; double-strand break repair via homologous recombination [GO:0000724]; mitotic cell size control checkpoint [GO:0031567]; regulation of cell size [GO:0008361]; trichome branching [GO:0010091]
ASHR3	DcASHR3	Class V-like SAM-binding methyltransferase superfamily, Histone-lysine methyltransferase family, SET2 subfamily	multicellular organism development [GO:0007275]; regulation of transcription, DNA-templated [GO:0006355]
ASK1	AtSK11	Protein kinase superfamily, CMGC Ser/Thr protein kinase family, GSK-3 subfamily	hyperosmotic salinity response [GO:0042538]; meristem structural organization [GO:0009933]; positive regulation of response to salt stress [GO:1901002]; response to salt stress [GO:0009651]; signal transduction [GO:0007165]
ASK10	TaHIR1,CaHIR1	HIR1 family (one gene),Protein kinase superfamily, CMGC Ser/Thr protein kinase family, GSK-3 subfamily	signal transduction [GO:0007165]
ASK14	ASK14	SKP1 family	protein ubiquitination [GO:0016567]; SCF-dependent proteasomal ubiquitin-dependent protein catabolic process [GO:0031146]; ubiquitin-dependent protein catabolic process [GO:0006511]
ASK3	AtSK12	Protein kinase superfamily, CMGC Ser/Thr protein kinase family, GSK-3 subfamily	meristem structural organization [GO:0009933]; protein autophosphorylation [GO:0046777]; signal transduction [GO:0007165]
ASK7	BIN2	Protein kinase superfamily, CMGC Ser/Thr protein kinase family, GSK-3 subfamily	brassinosteroid mediated signaling pathway [GO:0009742]; detection of brassinosteroid stimulus [GO:0009729]; leaf morphogenesis [GO:0009965]; multidimensional cell growth [GO:0009825]; negative regulation of brassinosteroid mediated signaling pathway [GO:1900458]; positive regulation of protein export from nucleus [GO:0046827]; protein autophosphorylation [GO:0046777]; protein phosphorylation [GO…
ASK9	OsGSK1	Protein kinase superfamily, CMGC Ser/Thr protein kinase family, GSK-3 subfamily	brassinosteroid mediated signaling pathway [GO:0009742]; hyperosmotic salinity response [GO:0042538]; protein autophosphorylation [GO:0046777]; protein phosphorylation [GO:0006468]; regulation of protein localization [GO:0032880]; signal transduction [GO:0007165]
ASMT1	ASMT,AtASMT,MdASMT1	Class I-like SAM-binding methyltransferase superfamily, Cation-independent O-methyltransferase family	aromatic compound biosynthetic process [GO:0019438]; melatonin biosynthetic process [GO:0030187]; methylation [GO:0032259]
ASN1	AS	Terpene synthase family, Tpsd subfamily,ASN1 family (one gene)	metabolic process [GO:0008152],asparagine biosynthetic process [GO:0006529]; glutamine metabolic process [GO:0006541]; L-asparagine biosynthetic process [GO:0070981]
ASO	PAS	Oxygen-dependent FAD-linked oxidoreductase family	alkaloid metabolic process [GO:0009820]
ASPG1	ASPG1,OsASPG1	Peptidase A1 family	protein catabolic process [GO:0030163]; proteolysis [GO:0006508]; response to abscisic acid [GO:0009737]; response to water deprivation [GO:0009414]; systemic acquired resistance [GO:0009627]
ASR2	ASR2,OsASR2,StASR2	Abscisic acid and water stress-induced protein family
ASR3	OsASR3,ZmASR3,ASR3,PgASR3	ASR3 family (one gene)	cellular response to molecule of bacterial origin [GO:0071219]; defense response [GO:0006952]; negative regulation of immune response [GO:0050777]; negative regulation of transcription, DNA-templated [GO:0045892]; regulation of transcription, DNA-templated [GO:0006355]
ASR5	ASR5,OsASR5,HvASR5,OsASR1,TaASR1,ASR1,SiASR1,ZnASR1,StASR1,SbASR1,TtASR1,BdASR1,ZmASR1	Abscisic acid and water stress-induced protein family	regulation of transcription, DNA-templated [GO:0006355]; response to aluminum ion [GO:0010044]; response to oxidative stress [GO:0006979]; response to water deprivation [GO:0009414],DroughtDB Function: putative TF
ATG10	ATG10	ATG10 family	autophagy [GO:0006914]; cellular pigment accumulation [GO:0043482]; cellular response to nitrogen starvation [GO:0006995]; defense response to bacterium [GO:0042742]; defense response to fungus [GO:0050832]; positive regulation of autophagosome assembly [GO:2000786]; response to carbon starvation [GO:0090549]
ATG3	ATG3	ATG3 family	autophagosome assembly [GO:0000045]; autophagy of mitochondrion [GO:0000422]; autophagy of nucleus [GO:0044804]; protein transport [GO:0015031]
ATG6	ATG6,OsATG6,HvATG6,CaATG6	Beclin family	autophagosome assembly [GO:0000045]; cellular response to nitrogen starvation [GO:0006995]; defense response to fungus [GO:0050832]; late endosome to vacuole transport [GO:0045324]; pollen germination [GO:0009846]; protein targeting to vacuole [GO:0006623]
ATG8E	ATG8E	ATG8 family	autophagy [GO:0006914]; cellular response to nitrogen starvation [GO:0006995]; cellular response to starvation [GO:0009267]; protein transport [GO:0015031]
ATH1	ATH1	TALE/BELL homeobox family	floral organ abscission [GO:0010227]; meristem maintenance [GO:0010073]; negative regulation of cell population proliferation [GO:0008285]; photomorphogenesis [GO:0009640]; regulation of gibberellin biosynthetic process [GO:0010371]; shoot organ boundary specification [GO:0090470]; vegetative to reproductive phase transition of meristem [GO:0010228]
ATHB-14	PHB	HD-ZIP homeobox family, Class III subfamily	adaxial/abaxial pattern specification [GO:0009955]; cell differentiation [GO:0030154]; determination of bilateral symmetry [GO:0009855]; integument development [GO:0080060]; meristem initiation [GO:0010014]; polarity specification of adaxial/abaxial axis [GO:0009944]; primary shoot apical meristem specification [GO:0010072]
ATHB6	ATHB6	HD-ZIP homeobox family	DroughtDB Tags: overexpression: ABA insensitivity; water loss in leaves from overexpressing lines increased
ATI1	ATI1	ATI1 family (one gene)	plastid to vacuole vesicle-mediated transport [GO:1904962]; protein targeting to vacuole involved in autophagy [GO:0071211]
ATJ10	C10,BdC10	DnaJ family, C/III subfamily
ATJ11	J11	DnaJ family, C/III subfamily
ATJ20	C20	DnaJ family, C/III subfamily	chaperone-mediated protein folding [GO:0061077]; regulation of 1-deoxy-D-xylulose-5-phosphate synthase activity [GO:1902395]; regulation of isopentenyl diphosphate biosynthetic process, methylerythritol 4-phosphate pathway [GO:0010322]
ATJ3	AtJ3,J3,A3	DnaJ family, A/I subfamily	photoperiodism, flowering [GO:0048573]; positive regulation of flower development [GO:0009911]; protein folding [GO:0006457]; regulation of ATPase activity [GO:0043462]; response to heat [GO:0009408]; response to salt stress [GO:0009651]
ATJ6	C6	DnaJ family, C/III subfamily
ATJ72	C72,BdC72	DnaJ family, C/III subfamily
ATL	ATL	RING-type zinc finger family, ATL subfamily	DroughtDB Tags: Post-translational Modification;Ubiquitin Ligases
ATL1	AhATL1	RING-type zinc finger family, ATL subfamily	protein ubiquitination [GO:0016567]
ATL55	CaRING1,OsRING1	RING-type zinc finger family, ATL subfamily	defense response [GO:0006952]; positive regulation of programmed cell death [GO:0043068]; programmed cell death [GO:0012501]; protein autoubiquitination [GO:0051865]; protein ubiquitination [GO:0016567]; response to bacterium [GO:0009617]; response to chitin [GO:0010200]; response to molecule of fungal origin [GO:0002238]
ATL61	ATL61	RING-type zinc finger family, ATL subfamily	protein ubiquitination [GO:0016567]
ATL78	AtATL78	RING-type zinc finger family, ATL subfamily	protein ubiquitination [GO:0016567]
ATL81	AtATL81	RING-type zinc finger family, ATL subfamily	protein ubiquitination [GO:0016567]
ATP1	PDL1,SDIRIP1	Pterin-4-alpha-carbinolamine dehydratase family	chloroplast ribulose bisphosphate carboxylase complex assembly [GO:0110102]; response to abscisic acid [GO:0009737]; response to salt stress [GO:0009651]; tetrahydrobiopterin biosynthetic process [GO:0006729]
atpE	atpE	ATPase C chain family	ATP synthesis coupled proton transport [GO:0015986]
ATR1	ZmAR1	NADPH--cytochrome P450 reductase family; Flavodoxin family; Flavoprotein pyridine nucleotide cytochrome reductase family	phenylpropanoid metabolic process [GO:0009698]; response to abscisic acid [GO:0009737]; response to oxidative stress [GO:0006979]
ATS3A	ATS3A	ATS3A family (one gene)
ATX1	ATX1	Class V-like SAM-binding methyltransferase superfamily, Histone-lysine methyltransferase family, TRX/MLL subfamily	abscisic acid-activated signaling pathway [GO:0009738]; actin cytoskeleton organization [GO:0030036]; histone H3-K4 methylation [GO:0051568]; histone H3-K4 trimethylation [GO:0080182]; intracellular signal transduction [GO:0035556]; negative regulation of flower development [GO:0009910]; peptidyl-lysine methylation [GO:0018022]; quiescent center organization [GO:1904961]; regulation of flower dev…
ATX4	ATX4	Class V-like SAM-binding methyltransferase superfamily, Histone-lysine methyltransferase family, TRX/MLL subfamily	chromatin organization [GO:0006325]; methylation [GO:0032259]; positive regulation of histone H3-K4 methylation [GO:0051571]
ATX5	ATX5	Class V-like SAM-binding methyltransferase superfamily, Histone-lysine methyltransferase family, TRX/MLL subfamily	chromatin organization [GO:0006325]; DNA mediated transformation [GO:0009294]; methylation [GO:0032259]; positive regulation of histone H3-K4 methylation [GO:0051571]
ATXR4	DcATXR4	Class V-like SAM-binding methyltransferase superfamily, Histone-lysine methyltransferase family, TRX/MLL subfamily	histone lysine methylation [GO:0034968]
AUX1	OsAUX1,AUX1,AUX	Amino acid/polyamine transporter 2 family, Amino acid/auxin permease (AAAP) (TC 2.A.18.1) subfamily	amino acid transmembrane transport [GO:0003333]; auxin-activated signaling pathway [GO:0009734]; auxin polar transport [GO:0009926]; establishment of planar polarity [GO:0001736]; lateral root formation [GO:0010311]; positive gravitropism [GO:0009958]; response to nematode [GO:0009624]; root cap development [GO:0048829]; root hair cell differentiation [GO:0048765]
AVP1	AVP1	H(+)-translocating pyrophosphatase (TC 3.A.10) family, K(+)-stimulated subfamily	auxin polar transport [GO:0009926]; cell wall pectin metabolic process [GO:0052546]; establishment or maintenance of transmembrane electrochemical gradient [GO:0010248]; leaf development [GO:0048366]; regulation of starch metabolic process [GO:2000904]; response to salt stress [GO:0009651]; response to water deprivation [GO:0009414]; sucrose metabolic process [GO:0005985]
AZF1	AZF1	AZF1 family (one gene)	abscisic acid-activated signaling pathway [GO:0009738]; hyperosmotic salinity response [GO:0042538]; negative regulation of transcription, DNA-templated [GO:0045892]; response to chitin [GO:0010200]; response to cold [GO:0009409]
AZF2	AZF2,SlZF2	AZF2 family (one gene)	abscisic acid-activated signaling pathway [GO:0009738]; embryo development ending in seed dormancy [GO:0009793]; hyperosmotic salinity response [GO:0042538]; negative regulation of transcription, DNA-templated [GO:0045892]; response to abscisic acid [GO:0009737]; response to chitin [GO:0010200]; response to water deprivation [GO:0009414]
AZF3	AZF3	AZF3 family (one gene)	hyperosmotic salinity response [GO:0042538]; negative regulation of transcription, DNA-templated [GO:0045892]; response to chitin [GO:0010200]; response to cold [GO:0009409]
AZI1	AZI1	Plant LTP family, PEARLI1 subfamily	cellular response to cold [GO:0070417]; cold acclimation [GO:0009631]; defense response to fungus [GO:0050832]; induced systemic resistance [GO:0009682]; plant-type hypersensitive response [GO:0009626]; systemic acquired resistance [GO:0009627]
B3	B3	TFDB_GO: B3 transcription factor	TFDB_GO: B3 transcription factor
BADH	BADH,SpBADH,ScBADH,CtBADH,AcBADH,SoBADH	Stephanie Manual Enter	Stephanie Manual Enter
BADH1	BADH1,MeBADH1,OsBADH1,PeBADH1	Aldehyde dehydrogenase family	cellular response to anoxia [GO:0071454]; glycine betaine biosynthetic process from choline [GO:0019285]
BADH2	PeBADH2,BADH2	Aldehyde dehydrogenase family	cellular response to anoxia [GO:0071454]; glycine betaine biosynthetic process from choline [GO:0019285]
BAG4	AtBAG4,BAG4	BAG4 family (one gene)	positive regulation of potassium ion transport [GO:0043268]; protein targeting to membrane [GO:0006612]; regulation of stomatal movement [GO:0010119]; response to cold [GO:0009409]; response to salt stress [GO:0009651]; vegetative to reproductive phase transition of meristem [GO:0010228]
BAH1	NLA	BAH1 family (one gene)	defense response to bacterium [GO:0042742]; plant-type hypersensitive response [GO:0009626]; regulation of salicylic acid metabolic process [GO:0010337]; response to benzoic acid [GO:0080021]; response to nitrate [GO:0010167]; response to salicylic acid [GO:0009751]; salicylic acid biosynthetic process [GO:0009697]; systemic acquired resistance [GO:0009627]
BAK1	BAK1	Protein kinase superfamily, Ser/Thr protein kinase family	defense response [GO:0006952]; protein phosphorylation [GO:0006468]
BAM1	GmBAM1,BAM1,HvBAM1	Glycosyl hydrolase 14 family	response to water deprivation [GO:0009414]; starch catabolic process [GO:0005983]
BAM3	BAM3	Glycosyl hydrolase 14 family	maltose biosynthetic process [GO:0000024]; response to cold [GO:0009409]; starch catabolic process [GO:0005983]
BAM5	BMY1	Glycosyl hydrolase 14 family	polysaccharide catabolic process [GO:0000272],response to herbivore [GO:0080027]; starch catabolic process [GO:0005983]
BAM9	BAM9	Glycosyl hydrolase 14 family	polysaccharide catabolic process [GO:0000272]
BAN	ANR,CsANR	NAD(P)-dependent epimerase/dehydratase family, Dihydroflavonol-4-reductase subfamily	flavonoid biosynthetic process [GO:0009813],flavonoid biosynthetic process [GO:0009813]; negative regulation of flavonoid biosynthetic process [GO:0009964]
BAP1	VvBAP1	BAP1 family (one gene)	cellular homeostasis [GO:0019725]; defense response [GO:0006952]; negative regulation of defense response [GO:0031348]; response to cold [GO:0009409]; response to heat [GO:0009408]; response to salicylic acid [GO:0009751]; response to temperature stimulus [GO:0009266]; response to wounding [GO:0009611]
BASS2	SBF1	Bile acid:sodium symporter (BASS) (TC 2.A.28) family	plasma membrane pyruvate transport [GO:0006849]
BAT1	BAT1,OsBAT1,AtBAT1	Amino acid-polyamine-organocation (APC) superfamily, Amino acid/choline transporter (ACT) (TC 2.A.3.4) family,Plant acyltransferase family	gamma-aminobutyric acid transport [GO:0015812],brassinosteroid biosynthetic process [GO:0016132]; phloem or xylem histogenesis [GO:0010087]; regulation of cell growth [GO:0001558]; response to abscisic acid [GO:0009737]; response to auxin [GO:0009733]; response to brassinosteroid [GO:0009741]
BB	BB	BB family (one gene)	floral organ development [GO:0048437]; negative regulation of cell population proliferation [GO:0008285]; negative regulation of organ growth [GO:0046621]; positive regulation of leaf senescence [GO:1900057]; protein autoubiquitination [GO:0051865]; protein ubiquitination [GO:0016567]
BBX19	OsBBX19,CmBBX19	BBX19 family (one gene)	negative regulation of photomorphogenesis [GO:0010100]; photomorphogenesis [GO:0009640]; regulation of transcription, DNA-templated [GO:0006355]
BBX21	STH2	BBX21 family (one gene)	photomorphogenesis [GO:0009640]; photoprotection [GO:0010117]; positive regulation of photosynthesis [GO:1905157]; regulation of transcription, DNA-templated [GO:0006355]; shade avoidance [GO:0009641]
BBX22	AtBBX22,CmBBX22,VvBBX22	BBX22 family (one gene)	photomorphogenesis [GO:0009640]; regulation of transcription, DNA-templated [GO:0006355]
BBX24	SsBBX24,CmBBX24,OsBBX24,BBX24	BBX24 family (one gene)	photomorphogenesis [GO:0009640]; photoperiodism, flowering [GO:0048573]; positive regulation of shade avoidance [GO:1902448]; regulation of transcription, DNA-templated [GO:0006355]; response to karrikin [GO:0080167]; response to light stimulus [GO:0009416]; seedling development [GO:0090351]; vegetative to reproductive phase transition of meristem [GO:0010228]
BCA1	CA1	Sterol desaturase family,Beta-class carbonic anhydrase family	carotenoid biosynthetic process [GO:0016117],carbon utilization [GO:0015976]; cyanate catabolic process [GO:0009440]; defense response to bacterium [GO:0042742]; defense response to fungus, incompatible interaction [GO:0009817]; negative regulation of stomatal complex development [GO:2000122]; photosynthesis [GO:0015979]; regulation of stomatal movement [GO:0010119]; response to carbon dioxide [G…
BCA2	CA2	Beta-class carbonic anhydrase family	carbon utilization [GO:0015976]; cyanate catabolic process [GO:0009440]; defense response to bacterium [GO:0042742]
BCA4	CA4	Beta-class carbonic anhydrase family	carbon utilization [GO:0015976]; cyanate catabolic process [GO:0009440]; negative regulation of stomatal complex development [GO:2000122]; regulation of stomatal movement [GO:0010119]; response to carbon dioxide [GO:0010037]
BCAT3	BCAT3	Class-IV pyridoxal-phosphate-dependent aminotransferase family	isoleucine biosynthetic process [GO:0009097]; leucine biosynthetic process [GO:0009098]; valine biosynthetic process [GO:0009099]
BCB	32	BCB family (one gene)	aluminum cation transport [GO:0015690]; cellular response to cold [GO:0070417]; cellular response to hypoxia [GO:0071456]; regulation of lignin biosynthetic process [GO:1901141]; response to absence of light [GO:0009646]; response to oomycetes [GO:0002239]; response to oxidative stress [GO:0006979]
BCP	GhBCP	BCP family (one gene)	response to symbiotic fungus [GO:0009610]
BCP1	BcBCP1,GhBCP1	BCP1 family (one gene)	pollen sperm cell differentiation [GO:0048235]
BDG1	BDG1,BDG,OsBDG	BDG1 family (one gene)	abscisic acid biosynthetic process [GO:0009688]; cell wall organization [GO:0071555]; cuticle development [GO:0042335]; cutin biosynthetic process [GO:0010143]; defense response to fungus [GO:0050832]; lateral root development [GO:0048527]; positive regulation of cutin biosynthetic process [GO:1901959]; positive regulation of response to water deprivation [GO:1902584]; regulation of abscisic acid…
BEE2	BEE2	BEE2 family (one gene)	regulation of transcription, DNA-templated [GO:0006355]; transcription, DNA-templated [GO:0006351]
BETA-OHASE 2	B2	Sterol desaturase family	xanthophyll biosynthetic process [GO:0016123]
BFT	BFT	Phosphatidylethanolamine-binding protein family	flower development [GO:0009908]; vegetative to reproductive phase transition of meristem [GO:0010228]
BG	BG	Peptidase A1 family	protein catabolic process [GO:0030163]; proteolysis [GO:0006508]
BGLU18	CsBGLU18,BG1,AtBG1	Glycosyl hydrolase 1 family,Glycosyl hydrolase	abscisic acid-activated signaling pathway [GO:0009738]; abscisic acid metabolic process [GO:0009687]; carbohydrate metabolic process [GO:0005975]; defense response to fungus [GO:0050832]; glucosinolate catabolic process [GO:0019762]; positive regulation of abscisic acid-activated signaling pathway [GO:0009789]; protein polymerization [GO:0051258]; regulation of stomatal movement [GO:0010119]; res…
bHLH	bHLH,CsbHLH,AtbHLH,OsbHLH,PebHLH,GmbHLH,NtbHLH,MdbHLH,StbHLH	TFDB_GO: bHLH transcription factor	TFDB_GO: bHLH transcription factor
BHLH2	EGL3	BHLH2 family (one gene)	epidermal cell fate specification [GO:0009957]; jasmonic acid mediated signaling pathway [GO:0009867]; multicellular organism development [GO:0007275]; regulation of transcription, DNA-templated [GO:0006355]; trichome differentiation [GO:0010026]
BI1	AtBI1,BI1,CaBI1	BI1 family	negative regulation of apoptotic process [GO:0043066]
BIG5	GmBEN1	BIG5 family (one gene)	defense response to bacterium [GO:0042742]; endocytosis [GO:0006897]; immune response [GO:0006955]; innate immune response [GO:0045087]; protein transport [GO:0015031]; regulation of ARF protein signal transduction [GO:0032012]; vesicle-mediated transport [GO:0016192]; viral process [GO:0016032]
BLH9	RPL	TALE/BELL homeobox family	floral whorl morphogenesis [GO:0048457]; fruit development [GO:0010154]; internode patterning [GO:0080006]; maintenance of floral meristem identity [GO:0010076]; maintenance of inflorescence meristem identity [GO:0010077]; negative regulation of transcription, DNA-templated [GO:0045892]; pattern specification process [GO:0007389]; plant organ formation [GO:1905393]; secondary shoot formation [GO:…
BLI	BLI	BLI family (one gene)	cotyledon morphogenesis [GO:0048826]; flower development [GO:0009908]; leaf morphogenesis [GO:0009965]; positive regulation of cell division [GO:0051781]; regulation of growth [GO:0040008]; regulation of transcription, DNA-templated [GO:0006355]; seed development [GO:0048316]; trichome branching [GO:0010091]
BMY1	AMY1	Glycosyl hydrolase 14 family	polysaccharide catabolic process [GO:0000272]
BON1	BON1	Copine family	cellular response to calcium ion [GO:0071277]; defense response [GO:0006952]; negative regulation of cell death [GO:0060548]; positive regulation of cell size [GO:0045793]; response to humidity [GO:0009270]; response to temperature stimulus [GO:0009266]
BRCA1	BRCA1	BRCA1 family (one gene)	cellular response to gamma radiation [GO:0071480]; DNA recombination [GO:0006310]; DNA repair [GO:0006281]; double-strand break repair via homologous recombination [GO:0000724]; negative regulation of fatty acid biosynthetic process [GO:0045717]; negative regulation of histone acetylation [GO:0035067]; positive regulation of cell cycle arrest [GO:0071158]; positive regulation of histone acetylati…
BRI1	BRI1,BdBRI1,SlBRI1,AtBRI1,PaBRI1	Protein kinase superfamily, Ser/Thr protein kinase family	anther wall tapetum cell differentiation [GO:0048657]; brassinosteroid homeostasis [GO:0010268]; brassinosteroid mediated signaling pathway [GO:0009742]; detection of brassinosteroid stimulus [GO:0009729]; hormone-mediated signaling pathway [GO:0009755]; leaf development [GO:0048366]; microtubule bundle formation [GO:0001578]; negative regulation of cell death [GO:0060548]; pollen exine formation…
BRL3	BRL3	Stephanie Manual Enter: brassinosteroid receptor	Stephanie Manual Enter: brassinosteroid receptor
BRN2	PeNAC070	BRN2 family (one gene)	plant-type secondary cell wall biogenesis [GO:0009834]; positive regulation of gene expression [GO:0010628]; positive regulation of transcription, DNA-templated [GO:0045893]; root cap development [GO:0048829]
BS	BS,GhTPS11	Terpene synthase family, Tpsa subfamily,Glycosyltransferase 20 family; Trehalose phosphatase family	sesquiterpene biosynthetic process [GO:0051762]; sesquiterpenoid biosynthetic process [GO:0016106],dephosphorylation [GO:0016311],defense response to fungus [GO:0050832]; terpenoid biosynthetic process [GO:0016114]
BSH	BSH	SNF5 family	cell cycle [GO:0007049]; chromatin remodeling [GO:0006338]; DNA repair [GO:0006281]; nucleosome disassembly [GO:0006337]; regulation of transcription by RNA polymerase II [GO:0006357]
BSK5	BSK5	Protein kinase superfamily, Ser/Thr protein kinase family	brassinosteroid mediated signaling pathway [GO:0009742]; response to abscisic acid [GO:0009737]; response to cold [GO:0009409]; response to salt stress [GO:0009651]
BSMT1	BSMT1	Methyltransferase superfamily, Type-7 methyltransferase family, SABATH subfamily	defense response [GO:0006952]; methylation [GO:0032259]; response to other organism [GO:0051707]; response to wounding [GO:0009611]
BT2	MdBT2	BT2 family (one gene)	abscisic acid-activated signaling pathway [GO:0009738]; auxin-activated signaling pathway [GO:0009734]; circadian rhythm [GO:0007623]; embryo sac development [GO:0009553]; pollen development [GO:0009555]; positive regulation of telomerase activity [GO:0051973]; protein ubiquitination [GO:0016567]; regulation of transcription, DNA-templated [GO:0006355]; response to abscisic acid [GO:0009737]; res…
BT4	IbBT4	BT4 family (one gene)	protein ubiquitination [GO:0016567]; regulation of transcription, DNA-templated [GO:0006355]; response to auxin [GO:0009733]; response to gibberellin [GO:0009739]; response to hydrogen peroxide [GO:0042542]; response to jasmonic acid [GO:0009753]; response to salicylic acid [GO:0009751]; response to salt stress [GO:0009651]; response to wounding [GO:0009611]
BTF3	BTF3,TaBTF3	NAC-beta family
BZ1	CaBZ1	UDP-glycosyltransferase family	anthocyanin-containing compound biosynthetic process [GO:0009718]
bZIP	bZIP,VrbZIP,VabZIP,MebZIP,GmbZIP,TabZIP,VvbZIP,MabZIP,CsbZIP,SibZIP,AabZIP,PvbZIP,AtbZIP,MdbZIP	BZIP family	DroughtDB Tags: Regulatory Proteins;Gene Expression;Transcription Factors;bZIP
bZIP12	CsbZIP12	BZIP family	TFDB_GO: bzip transcription factor
BZIP12	OSE2,ABF1,OsABF1,HvABF1,StABF1,CbABF1,GmABF1	BZIP12 family (one gene),BZIP family, ABI5 subfamily	abscisic acid-activated signaling pathway [GO:0009738]; positive regulation of abscisic acid-activated signaling pathway [GO:0009789]; positive regulation of response to salt stress [GO:1901002]; positive regulation of response to water deprivation [GO:1902584]; positive regulation of transcription, DNA-templated [GO:0045893],abscisic acid-activated signaling pathway [GO:0009738]
bZIP19	GmbZIP19	BZIP family	TFDB_GO: bzip transcription factor
bZIP23	OsbZIP23,VvbZIP23	BZIP family	DroughtDB Tags: Regulatory Proteins;Gene Expression;Transcription Factors;bZIP
bZIP30	VlbZIP30	BZIP family	TFDB_GO: bzip transcription factor
bZIP42	OsbZIP42	BZIP family	TFDB_GO: bzip transcription factor
BZIP46	TaABL1,ABL1,ABF3,AtABF3,CmABF3	BZIP46 family (one gene),BZIP family, ABI5 subfamily	abscisic acid-activated signaling pathway [GO:0009738]; positive regulation of abscisic acid-activated signaling pathway [GO:0009789]; regulation of transcription, DNA-templated [GO:0006355]; response to salt stress [GO:0009651]; response to water deprivation [GO:0009414],abscisic acid-activated signaling pathway [GO:0009738]; response to abscisic acid [GO:0009737]; response to salt stress [GO:00…
bZIP48	MdbZIP48	BZIP family	TFDB_GO: bzip transcription factor
bZIP5	FtbZIP5	BZIP family	TFDB_GO: bzip transcription factor
bZIP6	CsbZIP6	BZIP family	TFDB_GO: bzip transcription factor
bZIP71	OsbZIP71	BZIP family	DroughtDB Tags: Regulatory Proteins;Gene Expression;Transcription Factors;bZIP
bZIP72	OsbZIP72,ZmbZIP72	BZIP family	DroughtDB Tags: Regulatory Proteins;Gene Expression;Transcription Factors;bZIP
BZR1	BZR1,BdBZR1	BZR/LAT61 family	brassinosteroid mediated signaling pathway [GO:0009742]; negative regulation of transcription, DNA-templated [GO:0045892]; plant ovule development [GO:0048481]; regulation of growth [GO:0040008]; regulation of transcription, DNA-templated [GO:0006355]; seed development [GO:0048316]; transcription, DNA-templated [GO:0006351]
BZR2	BES1,BdBES1,TaBZR2	BZR/LAT61 family	brassinosteroid mediated signaling pathway [GO:0009742]; cellular response to brassinosteroid stimulus [GO:0071367]; quiescent center organization [GO:1904961]; transcription, DNA-templated [GO:0006351]
C1	C1,VuC1	Terpene synthase family
C2H2	C2H2	Cys2His2 zinc finger motifs (flybase)	TFDB_GO: C2H2 transcription factor
C3	C3	Terpene synthase family	farnesyl diphosphate metabolic process [GO:0045338]; response to jasmonic acid [GO:0009753]; sesquiterpene biosynthetic process [GO:0051762]; terpenoid biosynthetic process [GO:0016114]
C3H	C3H	TAIR: RING zinc finger protein-like	TFDB_GO: C3H transcription factor
CAB215	LHCB2	Light-harvesting chlorophyll a/b-binding (LHC) protein family	photosynthesis, light harvesting [GO:0009765]; protein-chromophore linkage [GO:0018298]
CAB8	LHCB1,CcLHCB1	Light-harvesting chlorophyll a/b-binding (LHC) protein family	photosynthesis, light harvesting [GO:0009765]; protein-chromophore linkage [GO:0018298]
CAD	CAD,LuCAD	Zinc-containing alcohol dehydrogenase family	lignin biosynthetic process [GO:0009809]
CAD1	CmCAD1,LuCAD1	Zinc-containing alcohol dehydrogenase family	lignin biosynthetic process [GO:0009809]
CAD2	CmCAD2	Zinc-containing alcohol dehydrogenase family	lignin biosynthetic process [GO:0009809]
CAD4	LuCAD4	Zinc-containing alcohol dehydrogenase family	lignin biosynthetic process [GO:0009809]; response to karrikin [GO:0080167]
CAD5	LuCAD6	Zinc-containing alcohol dehydrogenase family	lignin biosynthetic process [GO:0009809]
CAD6	CmCAD3,LuCAD3	Zinc-containing alcohol dehydrogenase family	lignin biosynthetic process [GO:0009809]
CAD8	LuCAD5	Zinc-containing alcohol dehydrogenase family	lignin biosynthetic process [GO:0009809],lignin biosynthetic process [GO:0009809]; response to bacterium [GO:0009617]
CALS12	PMR4	Glycosyltransferase 48 family	(1->3)-beta-D-glucan biosynthetic process [GO:0006075]; defense response [GO:0006952]; defense response by callose deposition [GO:0052542]; defense response by callose deposition in cell wall [GO:0052544]; defense response signaling pathway, resistance gene-dependent [GO:0009870]; defense response to bacterium [GO:0042742]; defense response to fungus [GO:0050832]; leaf morphogenesis [GO:0009965];…
CALS7	GSL7	Glycosyltransferase 48 family	(1->3)-beta-D-glucan biosynthetic process [GO:0006075]; callose deposition in phloem sieve plate [GO:0080165]; cell wall organization [GO:0071555]; phloem transport [GO:0010233]; regulation of cell shape [GO:0008360]
CAM2	CAM,CmCAL1	Calmodulin family,DEFL family	calcium-mediated signaling [GO:0019722],cadmium ion homeostasis [GO:0055073]; defense response [GO:0006952]
CAM3	CAM3	Calmodulin family	calcium-mediated signaling [GO:0019722]
CAM4	CAM4	Calmodulin family	calcium-mediated signaling [GO:0019722]
CAMTA	CAMTA,GmCAMTA,ZmCAMTA	calmodulin-binding transcription activator camta	TFDB_GO: CAMTA transcription factor
CAMTA1	PhCAMTA1,CAMTA1	CAMTA family	positive regulation of transcription, DNA-templated [GO:0045893]; positive regulation of transcription by RNA polymerase II [GO:0045944]; response to auxin [GO:0009733]; response to freezing [GO:0050826]; response to water deprivation [GO:0009414]
CAMTA3	CAMTA3	CAMTA family	cellular response to cold [GO:0070417]; defense response to bacterium [GO:0042742]; defense response to fungus [GO:0050832]; extracellular ATP signaling [GO:0106167]; leaf senescence [GO:0010150]; positive regulation of defense response to insect [GO:1900367]; positive regulation of transcription by RNA polymerase II [GO:0045944]; regulation of transcription, DNA-templated [GO:0006355]; response …
CAMTA6	SR3,PvSR3	CAMTA family	positive regulation of transcription by RNA polymerase II [GO:0045944]; regulation of transcription, DNA-templated [GO:0006355]
CAN1	CAN	Thermonuclease family
CAND1	CAND1,HVE	CAND family	protein ubiquitination [GO:0016567]; response to auxin [GO:0009733]; SCF complex assembly [GO:0010265]; vegetative to reproductive phase transition of meristem [GO:0010228]; xylem and phloem pattern formation [GO:0010051]
CAND2	AtPMTR1	UPF0359 family	G protein-coupled receptor signaling pathway [GO:0007186]; regulation of stomatal closure [GO:0090333]; response to molecule of bacterial origin [GO:0002237]; response to pheromone [GO:0019236]; root morphogenesis [GO:0010015]
CAO	CAO,AtCHL	CAO family (one gene)	protein heterotrimerization [GO:0070208]; protein import into chloroplast thylakoid membrane [GO:0045038]; response to high light intensity [GO:0009644],chlorophyll biosynthetic process [GO:0015995]
CAP	CAP,ThCAP	CAP family, AP2 domain TF	DroughtDB Tags: Regulatory Proteins;Gene Expression;Transcription Factors;AP2-Domain
CAP2	CAP2	CAP family, AP2 domain TF	DroughtDB Tags: Regulatory Proteins;Gene Expression;Transcription Factors;AP2-Domain
CAR4	OsGAP1,C2	Plant CAR protein family	abscisic acid-activated signaling pathway [GO:0009738]; defense response [GO:0006952]; positive regulation of defense response to bacterium, incompatible interaction [GO:1902479]; positive regulation of GTPase activity [GO:0043547]; positive regulation of response to salt stress [GO:1901002]; response to salt stress [GO:0009651]; response to wounding [GO:0009611],abscisic acid-activated signaling…
CAR9	CAR9	Plant CAR protein family	abscisic acid-activated signaling pathway [GO:0009738]; positive regulation of abscisic acid-activated signaling pathway [GO:0009789]; positive regulation of GTPase activity [GO:0043547]
CARK1	CARK1,ApCARK1	Protein kinase superfamily, Ser/Thr protein kinase family	abscisic acid-activated signaling pathway [GO:0009738]; positive regulation of abscisic acid-activated signaling pathway [GO:0009789]; positive regulation of response to water deprivation [GO:1902584]; protein phosphorylation [GO:0006468]
CAS1	CAS1	Terpene cyclase/mutase family	pentacyclic triterpenoid biosynthetic process [GO:0019745]; pollen development [GO:0009555]; thylakoid membrane organization [GO:0010027]
CAT2	ScCAT2,IbCAT2,CAT2,CAT,AtCAT,AmCAT,NtCAT,CsCAT,HuCAT,HbCAT,SmCAT,SlCAT,StCAT,TaCAT	Catalase family	cell death [GO:0008219]; cell redox homeostasis [GO:0045454]; cellular response to nitrogen starvation [GO:0006995]; cellular response to phosphate starvation [GO:0016036]; cellular response to sulfate starvation [GO:0009970]; hydrogen peroxide catabolic process [GO:0042744]; photoperiodism [GO:0009648]; response to cold [GO:0009409]; response to hydrogen peroxide [GO:0042542]; response to light …
CATA	OsCATA	Catalase family	circadian rhythm [GO:0007623]; hydrogen peroxide catabolic process [GO:0042744]; response to abscisic acid [GO:0009737]; response to bacterium [GO:0009617]; response to heat [GO:0009408]; response to hydrogen peroxide [GO:0042542]; response to light stimulus [GO:0009416]; response to salt [GO:1902074]; response to water deprivation [GO:0009414]
CATB	OsCATB	Catalase family	circadian rhythm [GO:0007623]; hydrogen peroxide catabolic process [GO:0042744]; regulation of cellular response to heat [GO:1900034]; response to abscisic acid [GO:0009737]; response to absence of light [GO:0009646]; response to cadmium ion [GO:0046686]; response to heat [GO:0009408]; response to hydrogen peroxide [GO:0042542]; response to salicylic acid [GO:0009751]; response to salt [GO:190207…
CATC	CAT1,AtCAT1,SlCAT1,TcCAT1,MeCAT1,NtCAT1	Catalase family	cell redox homeostasis [GO:0045454]; circadian rhythm [GO:0007623]; hydrogen peroxide biosynthetic process [GO:0050665]; hydrogen peroxide catabolic process [GO:0042744]; nitric oxide homeostasis [GO:0033484]; protein nitrosylation [GO:0017014]; response to abscisic acid [GO:0009737]; response to bacterium [GO:0009617]; response to cadmium ion [GO:0046686]; response to hydrogen peroxide [GO:00425…
CAU1	CAU1	H4R3sme2 (for histone H4 Arg 3 with symmetric dimethylation)-type histone methylase protein arginine methytransferase5/Shk1 binding protein1	DroughtDB Tags: Regulatory Proteins;Gene Expression;Histone Modification
CBF	CBF,GhCBF,BoCBF,VrCBF,BdCBF,HvCBF,AmCBF,LlCBF	Pseudouridine synthase TruB family, DREB family TF	DroughtDB Tags: Regulatory Proteins;Gene Expression;Transcription Factors;DREB
CBF4	CBF4,VrCBF4,VvCBF4,MtCBF4,HvCBF4,StCBF4,AtCBF4,PsCBF4	Pseudouridine synthase TruB family	DroughtDB Tags: Regulatory Proteins;Gene Expression;Transcription Factors;DREB
CBL	CBL,TaCBL,CsCBL,CaCBL,ScCBL,PsCBL,AtCBL,BrCBL	calcineurin B-like protein	DroughtDB Function: calcineurin B-like protein
CBL1	CBL1,AtCBL1,GmCBL1,TaCBL1,AmCBL1,PbCBL1,ScCBL1	Calcineurin regulatory subunit family,calcineurin B-like protein	abscisic acid-activated signaling pathway [GO:0009738]; calcium-mediated signaling [GO:0019722]; pollen tube growth [GO:0009860]; response to cold [GO:0009409]; response to osmotic stress [GO:0006970]; response to salt stress [GO:0009651]; response to water deprivation [GO:0009414],DroughtDB Function: calcineurin B-like protein
CBL2	AtCBL2,ScCBL2,CBL2	Calcineurin regulatory subunit family	calcium-mediated signaling [GO:0019722]; potassium ion homeostasis [GO:0055075]
CBL3	CsCBL3,AtCBL3,ScCBL3,ZmCBL3,CBL3	Calcineurin regulatory subunit family	detection of calcium ion [GO:0005513]; potassium ion homeostasis [GO:0055075]
CBL4	AtSOS3,SOS3,OsSOS3,GhSOS3,CsCBL4,ScCBL4,OsCBL4,AtCBL4,ZmCBL4	Calcineurin regulatory subunit family	cellular potassium ion homeostasis [GO:0030007]; detection of calcium ion [GO:0005513]; hypotonic salinity response [GO:0042539]
CBL5	CBL5,CsCBL5,OsCBL5,AtCBL5,ZmCBL5	Calcineurin regulatory subunit family	calcium-mediated signaling [GO:0019722]; response to osmotic stress [GO:0006970]; response to salt stress [GO:0009651]; response to water deprivation [GO:0009414]
CBL6	OsCBL6,SpCBL6,ScCBL6	Calcineurin regulatory subunit family	calcium-mediated signaling [GO:0019722]
CBL7	OsCBL7	Calcineurin regulatory subunit family	detection of calcium ion [GO:0005513]; negative regulation of ATPase activity [GO:0032780]; response to alkaline pH [GO:0010446]
CBP	CBP	Cap Binding Protein 20 (mRNA cap)	DroughtDB Function: Ion and Osmotic Homeostasis;Stomatal Movement;Regulatory Proteins;Gene Expression;miRNA
CBP20	CBP20,HvCBP20	RRM NCBP2 family	mRNA cis splicing, via spliceosome [GO:0045292]; mRNA splicing, via spliceosome [GO:0000398]; primary miRNA processing [GO:0031053]; RNA metabolic process [GO:0016070]; RNA splicing, via endonucleolytic cleavage and ligation [GO:0000394]
CBSDUF3	GmCBSDUF3	CBSDUF3 family (one gene)	cellular manganese ion homeostasis [GO:0030026]
CBSX3	OsCBSX3	CBSX3 family (one gene)	cell redox homeostasis [GO:0045454]
CCA1	CCA1,ZmCCA1,AtCCA1	CCA1 family (one gene)	circadian rhythm [GO:0007623]; long-day photoperiodism, flowering [GO:0048574]; negative regulation of circadian rhythm [GO:0042754]; negative regulation of transcription, DNA-templated [GO:0045892]; positive regulation of transcription, DNA-templated [GO:0045893]; regulation of gene expression [GO:0010468]; regulation of protein-containing complex assembly [GO:0043254]; response to cold [GO:0009…
CCD	CCD,NtCCD	Carotenoid oxygenase family
CCD1	CCD1,OsCCD1,TaCCD1,SgNCED1,NtNCED1,AhNCED1,CrNCED1,NCED1,CsNCED1,OsNCED1,MpNCED1,VuNCED1,SlNCED1,PvNCED1,VaNCED1,TrNCED1,CqNCED1,HvNCED1,VvNCED1,DcNCED1	Carotenoid oxygenase family	carotene catabolic process [GO:0016121]; carotenoid catabolic process [GO:0016118]; xanthophyll catabolic process [GO:0016124],abscisic acid-activated signaling pathway [GO:0009738]; abscisic acid biosynthetic process [GO:0009688]; anther development [GO:0048653]; beta-carotene biosynthetic process [GO:1901812]; carotene catabolic process [GO:0016121]; fruit ripening [GO:0009835]; lycopene biosyn…
CCD4	CCD4,OsNCED4,NCED4	Carotenoid oxygenase family	carotene catabolic process [GO:0016121]
CCD7	HTD1,MdCCD7	Carotenoid oxygenase family	carotene catabolic process [GO:0016121]; response to auxin [GO:0009733]; secondary shoot formation [GO:0010223]; strigolactone biosynthetic process [GO:1901601],carotene catabolic process [GO:0016121]; secondary shoot formation [GO:0010223]; strigolactone biosynthetic process [GO:1901601]
CCME	ATG1	CcmE/CycJ family	cytochrome complex assembly [GO:0017004]; protein-heme linkage [GO:0017003]
CCR2	HcCCR2	Protein kinase superfamily, Ser/Thr protein kinase family	protein phosphorylation [GO:0006468]
CCR4	CCR4	Protein kinase superfamily, Ser/Thr protein kinase family
CCS1	CCS1	Ccs1/CcsB family	cytochrome complex assembly [GO:0017004]
CDA1	CDD	Cytidine and deoxycytidylate deaminase family	cytidine catabolic process [GO:0006216]; cytidine deamination [GO:0009972]
CDC25	ASR,BdASR,MaASR,StASR,LcASR,TaASR,SlASR,TtASR,IpASR	MPI phosphatase family	cell cycle [GO:0007049]; cell division [GO:0051301]; protein phosphorylation [GO:0006468]; response to arsenic-containing substance [GO:0046685]
CDKA-1	CDC2	Protein kinase superfamily, CMGC Ser/Thr protein kinase family, CDC2/CDKX subfamily	cell cycle [GO:0007049]; cell division [GO:0051301],asymmetric cell division [GO:0008356]; cytokinesis by cell plate formation [GO:0000911]; DNA endoreduplication [GO:0042023]; embryo development ending in seed dormancy [GO:0009793]; G1/S transition of mitotic cell cycle [GO:0000082]; gametophyte development [GO:0048229]; guard mother cell cytokinesis [GO:0010235]; guard mother cell differentiati…
CDKD-1	R2	Protein kinase superfamily, CMGC Ser/Thr protein kinase family, CDC2/CDKX subfamily	cell cycle [GO:0007049]; cell division [GO:0051301]; positive regulation of transcription by RNA polymerase II [GO:0045944]; protein phosphorylation [GO:0006468]
CDKE-1	CDK8	Protein kinase superfamily, CMGC Ser/Thr protein kinase family, CDC2/CDKX subfamily	cell cycle [GO:0007049]; cell division [GO:0051301]; protein phosphorylation [GO:0006468]
CDPK	CDPK,GmCDPK,CgCDPK,LlCDPK,StCDPK,SiCDPK,FaCDPK	Protein kinase superfamily, Ser/Thr protein kinase family, CDPK subfamily	DroughtDB Tags: Regulatory Proteins;Signal Transduction;Protein Kinases
CDPK7	OsCDPK7,CDPK7	Protein kinase superfamily, Ser/Thr protein kinase family, CDPK subfamily	DroughtDB Tags: Regulatory Proteins;Signal Transduction;Protein Kinases
CEF	CEF	SEC23/SEC24 family, SEC24 subfamily	endoplasmic reticulum to Golgi vesicle-mediated transport [GO:0006888]; intracellular protein transport [GO:0006886]; response to oxidative stress [GO:0006979]
CEN	CEN	Phosphatidylethanolamine-binding protein family	negative regulation of flower development [GO:0009910]; vegetative to reproductive phase transition of meristem [GO:0010228]
CEPR1	VvXIP1	Protein kinase superfamily, Ser/Thr protein kinase family	lateral root formation [GO:0010311]; nitrate import [GO:1902025]; positive regulation of lateral root development [GO:1901333]; regulation of anthocyanin biosynthetic process [GO:0031540]; regulation of lateral root development [GO:2000023]; regulation of lignin biosynthetic process [GO:1901141]; regulation of root development [GO:2000280]; regulation of secondary cell wall biogenesis [GO:2000652…
CER2	CER2,AtCER2,MdCER2	Plant acyltransferase family	cell wall organization [GO:0071555]; pollen development [GO:0009555]; very long-chain fatty acid biosynthetic process [GO:0042761]; wax biosynthetic process [GO:0010025]
CER3	AtWAX2,CsWAX2,WAX2	Sterol desaturase family	alkane biosynthetic process [GO:0043447]; cuticle development [GO:0042335]; cuticle hydrocarbon biosynthetic process [GO:0006723]; lipid biosynthetic process [GO:0008610]; pollen sperm cell differentiation [GO:0048235]; wax biosynthetic process [GO:0010025]
CERK1	AhRLK1	Protein kinase superfamily, Ser/Thr protein kinase family	cell surface pattern recognition receptor signaling pathway [GO:0002752]; cellular response to chitin [GO:0071323]; cellular response to molecule of bacterial origin [GO:0071219]; defense response to bacterium [GO:0042742]; defense response to fungus, incompatible interaction [GO:0009817]; detection of molecule of fungal origin [GO:0032491]; detection of peptidoglycan [GO:0032499]; innate immune …
CET2	BjCET2	Phosphatidylethanolamine-binding protein family	negative regulation of flower development [GO:0009910]; vegetative to reproductive phase transition of meristem [GO:0010228]
CHER1	AtCTL1	Glycosyl hydrolase 19 family,CTL (choline transporter-like) family	cellulose biosynthetic process [GO:0030244]; cell wall macromolecule catabolic process [GO:0016998]; chitin catabolic process [GO:0006032]; ethylene-activated signaling pathway [GO:0009873]; multidimensional cell growth [GO:0009825]; regulation of salicylic acid metabolic process [GO:0010337]; response to cytokinin [GO:0009735]; response to heat [GO:0009408]; response to nitrate [GO:0010167]; res…
CHI	CH,TaCHI,CHI,NtCHI,CsCHI,MdCHI	Chalcone isomerase family,Glycosyl hydrolase 19 family, Chitinase class I subfamily	flavonoid biosynthetic process [GO:0009813],cell wall macromolecule catabolic process [GO:0016998]; chitin catabolic process [GO:0006032]; leaf senescence [GO:0010150]; polysaccharide catabolic process [GO:0000272]; response to amitrole [GO:0072722]; response to silver ion [GO:0010272]; response to virus [GO:0009615]; systemic acquired resistance [GO:0009627]
CHI-B	AtPR3,PR3	Glycosyl hydrolase 19 family, Chitinase class I subfamily	cell wall macromolecule catabolic process [GO:0016998]; chitin catabolic process [GO:0006032]; defense response to fungus [GO:0050832]; killing of cells of other organism [GO:0031640]; plant-type hypersensitive response [GO:0009626]; polysaccharide catabolic process [GO:0000272]; response to cadmium ion [GO:0046686]
CHI1	PO	Chalcone isomerase family	flavonoid biosynthetic process [GO:0009813]
CHI3	SlCHI3	Chalcone isomerase family	flavonoid biosynthetic process [GO:0009813],flavonoid biosynthetic process [GO:0009813]; response to karrikin [GO:0080167]
CHL1	AtCHL1,CHL1	CHL1 family (one gene)	signal transduction [GO:0007165]
CHLG	G4	UbiA prenyltransferase family, Chlorophyll synthase subfamily	chlorophyll biosynthetic process [GO:0015995]
CHLH	CHLH,ABAR,GUN5	Mg-chelatase subunit H family	chlorophyll biosynthetic process [GO:0015995]; photosynthesis [GO:0015979]
CHLI	MgCHLI	Mg-chelatase subunits D/I family	chlorophyll biosynthetic process [GO:0015995]; photosynthesis [GO:0015979]
CHLI1	CS	'GDXG' lipolytic enzyme family,Mg-chelatase subunits D/I family	alkaloid metabolic process [GO:0009820],chlorophyll biosynthetic process [GO:0015995]; photosynthesis [GO:0015979]
CHLN	CLN	Nicotianamine synthase (NAS)-like family	nicotianamine biosynthetic process [GO:0030418]
CHR4	OsCHR4	SNF2/RAD54 helicase family	chromatin organization [GO:0006325]
CHS1	CHS1,VvCHS1,TaCHS,CHS,NtCHS,CsCHS,MdCHS	Thiolase-like superfamily, Chalcone/stilbene synthases family	flavonoid biosynthetic process [GO:0009813],cannabinoid biosynthetic process [GO:1901696]; chalcone biosynthetic process [GO:0009715],auxin polar transport [GO:0009926]; flavonoid biosynthetic process [GO:0009813]; regulation of anthocyanin biosynthetic process [GO:0031540]; response to auxin [GO:0009733]; response to gravity [GO:0009629]; response to jasmonic acid [GO:0009753]; response to oxida…
Cht8	Cht2	Glycosyl hydrolase 19 family, Chitinase class I subfamily, Chitinase class II subfamily	cell wall macromolecule catabolic process [GO:0016998]; chitin catabolic process [GO:0006032]; defense response to fungus [GO:0050832]; polysaccharide catabolic process [GO:0000272]
Cht9	Cht1	Glycosyl hydrolase 19 family, Chitinase class I subfamily	cell wall macromolecule catabolic process [GO:0016998]; chitin catabolic process [GO:0006032]; defense response to fungus [GO:0050832]; polysaccharide catabolic process [GO:0000272]
CHX17	AtCHX17	Monovalent cation:proton antiporter 2 (CPA2) transporter (TC 2.A.37) family, CHX (TC 2.A.37.4) subfamily	monovalent inorganic cation transport [GO:0015672]; potassium ion transport [GO:0006813]; protein targeting to vacuole [GO:0006623]; regulation of pH [GO:0006885]
CIN1	CIN1	Glycosyl hydrolase 32 family	carbohydrate metabolic process [GO:0005975]
CIN2	OsCIN2,GIF1	Glycosyl hydrolase 32 family,SS18 family	carbohydrate metabolic process [GO:0005975]; carbohydrate storage [GO:0052576]; defense response to bacterium [GO:0042742]; defense response to fungus [GO:0050832],cell population proliferation [GO:0008283]; leaf development [GO:0048366]; positive regulation of transcription, DNA-templated [GO:0045893]; positive regulation of transcription by RNA polymerase II [GO:0045944]; seed development [GO:0…
CIN3	OsINV4,INV4	Glycosyl hydrolase 32 family	carbohydrate metabolic process [GO:0005975]
CIN7	GhINV1	Glycosyl hydrolase 32 family	carbohydrate metabolic process [GO:0005975]
CIPK	CIPK,TaCIPK,CsCIPK,OsCIPK,PsCIPK,MeCIPK,ZmCIPK,HsCIPK	Protein kinase superfamily, CAMK Ser/Thr protein kinase family, SNF1 subfamily	DroughtDB Tags: Regulatory Proteins;Signal Transduction;Protein Kinases
CIPK03	OsCIPK03	Protein kinase superfamily, CAMK Ser/Thr protein kinase family, SNF1 subfamily	DroughtDB Tags: Regulatory Proteins;Signal Transduction;Protein Kinases
CIPK1	SlCIPK1,CIPK1	Protein kinase superfamily, CAMK Ser/Thr protein kinase family, SNF1 subfamily	intracellular signal transduction [GO:0035556]; protein phosphorylation [GO:0006468]; response to abscisic acid [GO:0009737]; response to osmotic stress [GO:0006970]; response to salt stress [GO:0009651]
CIPK11	CIPK11,CsCIPK11	Protein kinase superfamily, CAMK Ser/Thr protein kinase family, SNF1 subfamily	protein phosphorylation [GO:0006468]; response to pH [GO:0009268]; signal transduction [GO:0007165]
CIPK12	OsCIPK12	Protein kinase superfamily, CAMK Ser/Thr protein kinase family, SNF1 subfamily	signal transduction [GO:0007165]
CIPK14	CsCIPK14,TaCIPK14,CIPK14	Protein kinase superfamily, CAMK Ser/Thr protein kinase family, SNF1 subfamily	response to abscisic acid [GO:0009737]; response to cold [GO:0009409]; response to glucose [GO:0009749]; response to heat [GO:0009408]; response to oxidative stress [GO:0006979]; response to salt stress [GO:0009651]; response to water deprivation [GO:0009414]; signal transduction [GO:0007165]
CIPK15	OsCIPK15,PKS3	Protein kinase superfamily, CAMK Ser/Thr protein kinase family, SNF1 subfamily	abscisic acid-activated signaling pathway [GO:0009738]; negative regulation of abscisic acid-activated signaling pathway [GO:0009788],DroughtDB Tags: Regulatory Proteins;Signal Transduction;Protein Kinases
CIPK16	ZmCIPK16	Protein kinase superfamily, CAMK Ser/Thr protein kinase family, SNF1 subfamily	hyperosmotic salinity response [GO:0042538]; signal transduction [GO:0007165]; sodium ion transport [GO:0006814]
CIPK17	CsCIPK17	Protein kinase superfamily, CAMK Ser/Thr protein kinase family, SNF1 subfamily	intracellular signal transduction [GO:0035556]; protein phosphorylation [GO:0006468]
CIPK2	TaCIPK2,CIPK2,NtCIPK2,CsCIPK2,HbCIPK2	Protein kinase superfamily, CAMK Ser/Thr protein kinase family, SNF1 subfamily	signal transduction [GO:0007165]
CIPK21	CIPK21	Protein kinase superfamily, CAMK Ser/Thr protein kinase family, SNF1 subfamily	cellular response to osmotic stress [GO:0071470]; cellular response to salt stress [GO:0071472]; intracellular signal transduction [GO:0035556]; protein phosphorylation [GO:0006468]
CIPK22	MdCIPK22	Protein kinase superfamily, CAMK Ser/Thr protein kinase family, SNF1 subfamily	signal transduction [GO:0007165]
CIPK23	OsCIPK23,CIPK23,TaCIPK23	Protein kinase superfamily, CAMK Ser/Thr protein kinase family, SNF1 subfamily	intracellular signal transduction [GO:0035556]; protein phosphorylation [GO:0006468]; response to nutrient [GO:0007584]; response to water deprivation [GO:0009414]; stomatal movement [GO:0010118]
CIPK24	TaCIPK24,AtSOS2,SOS2,GhSOS2,OsSOS2,SlSOS2	Protein kinase superfamily, CAMK Ser/Thr protein kinase family, SNF1 subfamily	intracellular signal transduction [GO:0035556]; protein phosphorylation [GO:0006468]; response to salt stress [GO:0009651]
CIPK26	SpCIPK26	Protein kinase superfamily, CAMK Ser/Thr protein kinase family, SNF1 subfamily	intracellular signal transduction [GO:0035556]; protein phosphorylation [GO:0006468]
CIPK27	TaCIPK27	Protein kinase superfamily, CAMK Ser/Thr protein kinase family, SNF1 subfamily	signal transduction [GO:0007165]
CIPK3	CsCIPK3,CIPK3	Protein kinase superfamily, CAMK Ser/Thr protein kinase family, SNF1 subfamily	signal transduction [GO:0007165]
CIPK6	AtSIP3,GhCIPK6,CIPK6,CsCIPK6,AtCIPK6	Protein kinase superfamily, CAMK Ser/Thr protein kinase family, SNF1 subfamily	basipetal auxin transport [GO:0010540]; hyperosmotic salinity response [GO:0042538]; multicellular organism development [GO:0007275]; response to salt stress [GO:0009651]; response to water deprivation [GO:0009414]; signal transduction [GO:0007165]
CIPK8	CIPK8,SlCIPK8,ScCIPK8	Protein kinase superfamily, CAMK Ser/Thr protein kinase family, SNF1 subfamily	intracellular signal transduction [GO:0035556]; protein autophosphorylation [GO:0046777]; protein phosphorylation [GO:0006468]; response to glucose [GO:0009749]; response to nitrate [GO:0010167]; root development [GO:0048364]
CITRX	TRX,P,BiP,Z	Thioredoxin family, Plant CITRX-type subfamily	cell redox homeostasis [GO:0045454]; defense response [GO:0006952]; plastid organization [GO:0009657]
CKX6	AtCKX7	Oxygen-dependent FAD-linked oxidoreductase family	cytokinin catabolic process [GO:0009823],cytokinin metabolic process [GO:0009690]; stomatal complex morphogenesis [GO:0010103]
CLB	AtCLB	Synaptotagmin family	lipid transport [GO:0006869]; negative regulation of transcription, DNA-templated [GO:0045892]; positive gravitropism [GO:0009958]; response to salt stress [GO:0009651]; response to water deprivation [GO:0009414]
CLE9	CLE9	CLV3/ESR signal peptide family	cell-cell signaling involved in cell fate commitment [GO:0045168]; multicellular organism development [GO:0007275]
CLF	ZmPIF1	PIF1 family (one gene),Class V-like SAM-binding methyltransferase superfamily, Histone-lysine methyltransferase family, EZ subfamily	chlorophyll biosynthetic process [GO:0015995]; gibberellic acid mediated signaling pathway [GO:0009740]; heme biosynthetic process [GO:0006783]; negative gravitropism [GO:0009959]; negative regulation of photomorphogenesis [GO:0010100]; negative regulation of seed germination [GO:0010187]; red light signaling pathway [GO:0010161]; regulation of photomorphogenesis [GO:0010099]; regulation of seed …
CLH1	CsCOR1	AB hydrolase superfamily, Lipase family	chlorophyll catabolic process [GO:0015996]; defense response to bacterium [GO:0042742]; defense response to fungus [GO:0050832]
CLPC1	DCA1	ClpA/ClpB family, ClpC subfamily	chloroplast organization [GO:0009658]; protein import into chloroplast stroma [GO:0045037]; protein targeting to chloroplast [GO:0045036]; regulation of chlorophyll biosynthetic process [GO:0010380]
CLPD	ERD1,BdERD1,GmERD1	ClpA/ClpB family, ClpD subfamily	protein-containing complex assembly [GO:0065003]; protein metabolic process [GO:0019538]
CLV1	CLV1	Protein kinase superfamily, Ser/Thr protein kinase family	cell differentiation [GO:0030154]; hormone-mediated signaling pathway [GO:0009755]; multicellular organism development [GO:0007275]; peptidyl-serine autophosphorylation [GO:0036289]; regulation of meristem structural organization [GO:0009934]
CM1	CM1	CM1 family (one gene)	aromatic amino acid family biosynthetic process [GO:0009073]; chorismate metabolic process [GO:0046417]
CM2	MdCM2	CM2 family (one gene)	aromatic amino acid family biosynthetic process [GO:0009073]; chorismate metabolic process [GO:0046417]
CML	CML,CsCML,OsCML,MtCML	calmodulin-like protein	DroughtDB Tags: Regulatory Proteins;Signal Transduction;Others
CML19	CML19	Centrin family	DNA repair [GO:0006281]; mitotic cell cycle [GO:0000278]
CML20	CML20,TaCML20	CML20 family (one gene)	abscisic acid-activated signaling pathway involved in stomatal movement [GO:1901527]; mitotic cell cycle [GO:0000278]
CML27	CML27,MuCML27	CML27 family (one gene)
CML37	CML37,AtCML37	CML37 family (one gene)	cellular response to hypoxia [GO:0071456]; response to ozone [GO:0010193]
CML38	CsCML38	CML38 family (one gene)	cellular response to hypoxia [GO:0071456]; response to wounding [GO:0009611]
CML42	CsCML42,CML42,AtCML42	CML42 family (one gene)	trichome branching [GO:0010091]
CML44	ShCML44	CML44 family (one gene)	cellular response to hypoxia [GO:0071456]
CML5	OsCML5	Calmodulin family
CMO	CMO,OsCMO,BvCMO,AhCMO,SoCMO	Choline monooxygenase family	glycine betaine biosynthetic process from choline [GO:0019285]
CNGC16	CNGC16	Cyclic nucleotide-gated cation channel (TC 1.A.1.5) family
CNGC2	DND1	Cyclic nucleotide-gated cation channel (TC 1.A.1.5) family	calcium ion import [GO:0070509]; defense response [GO:0006952]; nitric oxide mediated signal transduction [GO:0007263]; plant-type hypersensitive response [GO:0009626]
CNGC4	AtCNGC4	Cyclic nucleotide-gated cation channel (TC 1.A.1.5) family	plant-type hypersensitive response [GO:0009626]
CO	CO,SbCO,StCO	CONSTANS family	cell differentiation [GO:0030154]; far-red light signaling pathway [GO:0010018]; flower development [GO:0009908]; regulation of flower development [GO:0009909]; response to far red light [GO:0010218]
COI1A	OsCOI1,MdCOI1,COI1	COI1 family (one gene),COI1A family (one gene)	anther dehiscence [GO:0009901]; defense response [GO:0006952]; defense response to bacterium [GO:0042742]; defense response to fungus [GO:0050832]; extracellular ATP signaling [GO:0106167]; jasmonic acid and ethylene-dependent systemic resistance [GO:0009861]; jasmonic acid mediated signaling pathway [GO:0009867]; negative regulation of defense response [GO:0031348]; protein ubiquitination [GO:00…
COIN	OsCOIN	RING-finger protein	DroughtDB Function: RING-finger protein
COMT	COMT,TaCOMT,CrCOMT	Class I-like SAM-binding methyltransferase superfamily, Cation-independent O-methyltransferase family, COMT subfamily	aromatic compound biosynthetic process [GO:0019438]; flavonol biosynthetic process [GO:0051555]; lignin biosynthetic process [GO:0009809]; melatonin biosynthetic process [GO:0030187]; methylation [GO:0032259]
COP1	COP1	COP1 family (one gene)	anthocyanin-containing compound metabolic process [GO:0046283]; DNA repair [GO:0006281]; entrainment of circadian clock [GO:0009649]; photomorphogenesis [GO:0009640]; photoperiodism, flowering [GO:0048573]; red, far-red light phototransduction [GO:0009585]; regulation of stomatal movement [GO:0010119]; shade avoidance [GO:0009641]; skotomorphogenesis [GO:0009647]
COR15A	COR15A,AtCOR15A	COR15 protein family	circadian rhythm [GO:0007623]; cold acclimation [GO:0009631]; drought recovery [GO:0009819]; heat acclimation [GO:0010286]; leaf senescence [GO:0010150]; plastid inner membrane organization [GO:0009667]; protein complex oligomerization [GO:0051259]; protein homooligomerization [GO:0051260]; protein stabilization [GO:0050821]; red or far-red light signaling pathway [GO:0010017]; response to abscis…
COR15B	COR15B	COR15 protein family	cold acclimation [GO:0009631]; defense response to fungus [GO:0050832]; leaf senescence [GO:0010150]; response to abscisic acid [GO:0009737]; response to cold [GO:0009409]
COR413IM1	SlCOR413IM1,COR413TM1,COR414TM1	Cold-regulated 413 protein family	cellular response to cold [GO:0070417]; cellular response to water deprivation [GO:0042631]; cold acclimation [GO:0009631]; response to abscisic acid [GO:0009737]
COR413PM1	COR413PM1	Cold-regulated 413 protein family	cellular response to water deprivation [GO:0042631]; cold acclimation [GO:0009631]; response to abscisic acid [GO:0009737]
COR47	COR47,MtCOR47,AtCOR47,RD17	Plant dehydrin family	cold acclimation [GO:0009631]; defense response to fungus [GO:0050832]; heat acclimation [GO:0010286]; response to abscisic acid [GO:0009737]; response to cold [GO:0009409]; response to osmotic stress [GO:0006970]; response to water deprivation [GO:0009414]
CORI3	CORI3	Class-I pyridoxal-phosphate-dependent aminotransferase family	biosynthetic process [GO:0009058]; cellular amino acid metabolic process [GO:0006520]; hyperosmotic salinity response [GO:0042538]; response to abscisic acid [GO:0009737]; response to jasmonic acid [GO:0009753]; response to microbial phytotoxin [GO:0010188]; response to wounding [GO:0009611]
COX2	COX2	Cytochrome c oxidase subunit 2 family
CP	CP,TaCP	Peptidase C1 family	proteolysis involved in cellular protein catabolic process [GO:0051603]
CP1	OsACP1,AtACP1	CP1 family (one gene)	hyperosmotic salinity response [GO:0042538]
CP12	OsCP12	CP12 family	negative regulation of reductive pentose-phosphate cycle [GO:0080153]; positive regulation of protein-containing complex assembly [GO:0031334]; reductive pentose-phosphate cycle [GO:0019253]
CPA	CPA,NLP1,AtNLP1	Carbon-nitrogen hydrolase superfamily	putrescine biosynthetic process [GO:0009446]; putrescine biosynthetic process from arginine [GO:0033388]
CPC	CPC	CPC family (one gene)	cell differentiation [GO:0030154]; epidermal cell differentiation [GO:0009913]; positive regulation of trichoblast fate specification [GO:0010063]; stomatal complex formation [GO:0010376]
CPI1	HvCPI1	CPI1 family (one gene)
CPK	CPK,MeCPK	Protein kinase superfamily, Ser/Thr protein kinase family, CDPK subfamily	DroughtDB Tags: Regulatory Proteins;Signal Transduction;Protein Kinases
CPK1	AtCPK1,VfCPK1	Protein kinase superfamily, Ser/Thr protein kinase family, CDPK subfamily	intracellular signal transduction [GO:0035556]; peptidyl-serine phosphorylation [GO:0018105]; protein autophosphorylation [GO:0046777]; protein phosphorylation [GO:0006468]
CPK10	OsCPK10,PeCPK10,CPK10	Protein kinase superfamily, Ser/Thr protein kinase family, CDPK subfamily	intracellular signal transduction [GO:0035556]; peptidyl-serine phosphorylation [GO:0018105]; protein autophosphorylation [GO:0046777]
CPK12	OsCDPK9	Protein kinase superfamily, Ser/Thr protein kinase family, CDPK subfamily	abscisic acid-activated signaling pathway [GO:0009738]; intracellular signal transduction [GO:0035556]; peptidyl-serine phosphorylation [GO:0018105]; protein autophosphorylation [GO:0046777]
CPK19	OsCPK19	Protein kinase superfamily, Ser/Thr protein kinase family, CDPK subfamily	intracellular signal transduction [GO:0035556]; peptidyl-serine phosphorylation [GO:0018105]; protein autophosphorylation [GO:0046777]
CPK20	VaCPK20	Protein kinase superfamily, Ser/Thr protein kinase family, CDPK subfamily	intracellular signal transduction [GO:0035556]; peptidyl-serine phosphorylation [GO:0018105]; protein autophosphorylation [GO:0046777]
CPK21	CPK21	Protein kinase superfamily, Ser/Thr protein kinase family, CDPK subfamily	DroughtDB Tags: Regulatory Proteins;Signal Transduction;Protein Kinases
CPK23	AtCPK23,SPK	Protein kinase superfamily, Ser/Thr protein kinase family, CDPK subfamily	intracellular signal transduction [GO:0035556]; peptidyl-serine phosphorylation [GO:0018105]; protein autophosphorylation [GO:0046777]
CPK25	OsCPK25	Protein kinase superfamily, Ser/Thr protein kinase family, CDPK subfamily	intracellular signal transduction [GO:0035556]; peptidyl-serine phosphorylation [GO:0018105]; protein autophosphorylation [GO:0046777]
CPK26	OsCPK26	Protein kinase superfamily, Ser/Thr protein kinase family, CDPK subfamily	intracellular signal transduction [GO:0035556]; peptidyl-serine phosphorylation [GO:0018105]; protein autophosphorylation [GO:0046777]
CPK3	OsCDPK6,CPK3	Protein kinase superfamily, Ser/Thr protein kinase family, CDPK subfamily	abscisic acid-activated signaling pathway [GO:0009738]; intracellular signal transduction [GO:0035556]; peptidyl-serine phosphorylation [GO:0018105]; protein autophosphorylation [GO:0046777]; regulation of anion channel activity [GO:0010359]; regulation of stomatal movement [GO:0010119]; response to salt stress [GO:0009651]
CPK33	CPK33	Protein kinase superfamily, Ser/Thr protein kinase family, CDPK subfamily	intracellular signal transduction [GO:0035556]; peptidyl-serine phosphorylation [GO:0018105]; protein autophosphorylation [GO:0046777]
CPK34	CPK34,TaCPK34	Protein kinase superfamily, Ser/Thr protein kinase family, CDPK subfamily	intracellular signal transduction [GO:0035556]; peptidyl-serine phosphorylation [GO:0018105]; protein autophosphorylation [GO:0046777]; regulation of pollen tube growth [GO:0080092]
CPK4	CPK4,ZmCPK4,OsCPK4	Protein kinase superfamily, Ser/Thr protein kinase family, CDPK subfamily	DroughtDB Tags: Regulatory Proteins;Signal Transduction;Protein Kinases
CPK6	CDPK3,GmCDPK3,StCDPK3,OsCPK6,AtCPK6	Protein kinase superfamily, Ser/Thr protein kinase family, CDPK subfamily	abscisic acid-activated signaling pathway [GO:0009738]; intracellular signal transduction [GO:0035556]; peptidyl-serine phosphorylation [GO:0018105]; protein autophosphorylation [GO:0046777]; regulation of anion channel activity [GO:0010359]; regulation of stomatal movement [GO:0010119]; regulation of stomatal opening [GO:1902456]; response to abscisic acid [GO:0009737]
CPK7	CPK11	Protein kinase superfamily, Ser/Thr protein kinase family, CDPK subfamily	intracellular signal transduction [GO:0035556]; peptidyl-serine phosphorylation [GO:0018105]; protein autophosphorylation [GO:0046777]; response to cold [GO:0009409]
CPK8	CPK8,OsCDPK19	Protein kinase superfamily, Ser/Thr protein kinase family, CDPK subfamily	intracellular signal transduction [GO:0035556]; peptidyl-serine phosphorylation [GO:0018105]; protein autophosphorylation [GO:0046777]
CPL1	CPL1,FRY2	CPL1 family (one gene)	abscisic acid-activated signaling pathway [GO:0009738]; dephosphorylation of RNA polymerase II C-terminal domain [GO:0070940]; multicellular organism development [GO:0007275]; negative regulation of transcription, DNA-templated [GO:0045892]; nuclear-transcribed mRNA catabolic process, nonsense-mediated decay [GO:0000184]; response to salt stress [GO:0009651]; response to wounding [GO:0009611]
CPL5	AtCPL5	CPL5 family (one gene)	abscisic acid-activated signaling pathway [GO:0009738]; dephosphorylation of RNA polymerase II C-terminal domain [GO:0070940]; response to abscisic acid [GO:0009737]; response to cold [GO:0009409]; response to salt [GO:1902074]; response to water deprivation [GO:0009414]
CPP	CPP,ZmCPP	TFDB_GO: CPP transcription factor	TFDB_GO: CPP transcription factor
CPP1	SlCDF1,StCDF1	CDF1 family (one gene),Chaperone-like protein of POR1 protein family	chloroplast organization [GO:0009658]; flower development [GO:0009908]; negative regulation of transcription, DNA-templated [GO:0045892]; regulation of timing of transition from vegetative to reproductive phase [GO:0048510]; regulation of transcription, DNA-templated [GO:0006355]; vegetative to reproductive phase transition of meristem [GO:0010228],cell death [GO:0008219]; chaperone-mediated prot…
CPR5	CPR5	CPR5 family (one gene)	defense response [GO:0006952]; leaf senescence [GO:0010150]; photoperiodism, flowering [GO:0048573]; sugar mediated signaling pathway [GO:0010182]; systemic acquired resistance [GO:0009627]; trichome morphogenesis [GO:0010090]
CRF1	SlCRF1	AP2/ERF transcription factor family, ERF subfamily	cotyledon development [GO:0048825]; cytokinin-activated signaling pathway [GO:0009736]; ethylene-activated signaling pathway [GO:0009873]; leaf development [GO:0048366]
CRF2	SlCRF2	AP2/ERF transcription factor family, ERF subfamily	cotyledon development [GO:0048825]; cytokinin-activated signaling pathway [GO:0009736]; ethylene-activated signaling pathway [GO:0009873]; root development [GO:0048364]
CRF3	SlCRF3	AP2/ERF transcription factor family, ERF subfamily	cotyledon development [GO:0048825]; cytokinin-activated signaling pathway [GO:0009736]; ethylene-activated signaling pathway [GO:0009873]; leaf development [GO:0048366]
CRF5	SlCRF5,CRF5	AP2/ERF transcription factor family, ERF subfamily	cotyledon development [GO:0048825]; cytokinin-activated signaling pathway [GO:0009736]; embryo development ending in seed dormancy [GO:0009793]; ethylene-activated signaling pathway [GO:0009873]; leaf development [GO:0048366]
CRK19	CRK19	Protein kinase superfamily, Ser/Thr protein kinase family, CRK subfamily	defense response to bacterium [GO:0042742]; protein phosphorylation [GO:0006468]; response to salicylic acid [GO:0009751]
CRK4	CP4,CRK4	Protein kinase superfamily, Ser/Thr protein kinase family, CDPK subfamily	intracellular signal transduction [GO:0035556]; peptidyl-serine phosphorylation [GO:0018105]; protein autophosphorylation [GO:0046777]
CRK45	CRK45	Protein kinase superfamily, Ser/Thr protein kinase family, CRK subfamily	defense response [GO:0006952]; positive regulation of defense response [GO:0031349]; protein phosphorylation [GO:0006468]; regulation of abscisic acid-activated signaling pathway [GO:0009787]
CRK5	CRK5	Protein kinase superfamily, Ser/Thr protein kinase family, CRK subfamily, CDPK subfamily	defense response to bacterium [GO:0042742]; programmed cell death [GO:0012501]; protein phosphorylation [GO:0006468]; response to salicylic acid [GO:0009751],intracellular signal transduction [GO:0035556]; peptidyl-serine phosphorylation [GO:0018105]; protein autophosphorylation [GO:0046777]
CRK6	NtRLK5,OsRLK5	Protein kinase superfamily, Ser/Thr protein kinase family, CRK subfamily	defense response to Gram-negative bacterium [GO:0050829]; floral organ abscission [GO:0010227]; lateral root morphogenesis [GO:0010102]; leaf abscission [GO:0060866]; pectin catabolic process [GO:0045490]; protein autophosphorylation [GO:0046777]; regulation of gene expression [GO:0010468],defense response to bacterium [GO:0042742]; protein phosphorylation [GO:0006468]; response to reactive oxyge…
CRL	CRL	CpcT/CpeT biliprotein lyase family	cell cycle [GO:0007049]; cell division [GO:0051301]; cellular response to virus [GO:0098586]; chloroplast fission [GO:0010020]; defense response [GO:0006952]; multicellular organism development [GO:0007275]; plastid fission [GO:0043572]; protein-phycocyanobilin linkage [GO:0017009]; regulation of cell division [GO:0051302]; response to reactive oxygen species [GO:0000302]; transport of virus in h…
CRSH	InCRSH	RelA/SpoT family	guanosine tetraphosphate metabolic process [GO:0015969]
CRT	TaCRT,CRT	Calreticulin, Ca2+ binding protein	DroughtDB Tags: Regulatory Proteins;Signal Transduction;Others
CRT3	CRT3	Calreticulin family	anthocyanin-containing compound metabolic process [GO:0046283]; defense response to bacterium [GO:0042742]; endoplasmic reticulum unfolded protein response [GO:0030968]; innate immune response-activating signal transduction [GO:0002758]; plant-type hypersensitive response [GO:0009626]; protein folding [GO:0006457]
CRY2	CRY2	DNA photolyase class-1 family	blue light signaling pathway [GO:0009785]; chromatin organization [GO:0006325]; chromatin remodeling [GO:0006338]; circadian regulation of calcium ion oscillation [GO:0010617]; circadian rhythm [GO:0007623]; defense response to virus [GO:0051607]; flavin adenine dinucleotide metabolic process [GO:0072387]; long-day photoperiodism, flowering [GO:0048574]; phosphorylation [GO:0016310]; phototropism…
CSD1	AtCSD1,CSD1,AhCSD1,BcCSD1	Cu-Zn superoxide dismutase family	cellular response to copper ion [GO:0071280]; cellular response to light intensity [GO:0071484]; cellular response to oxidative stress [GO:0034599]; cellular response to ozone [GO:0071457]; cellular response to salt stress [GO:0071472]; cellular response to sucrose stimulus [GO:0071329]; cellular response to UV-B [GO:0071493]; defense response to bacterium [GO:0042742]; gene silencing by miRNA [G…
CSD2	AtCSD2,CSD2	Cu-Zn superoxide dismutase family	cellular response to light intensity [GO:0071484]; cellular response to oxidative stress [GO:0034599]; cellular response to ozone [GO:0071457]; cellular response to salt stress [GO:0071472]; cellular response to sucrose stimulus [GO:0071329]; cellular response to UV-B [GO:0071493]; gene silencing by miRNA [GO:0035195]; removal of superoxide radicals [GO:0019430]; response to copper ion [GO:004668…
CSN5A	CSN5B	Peptidase M67A family, CSN5 subfamily	COP9 signalosome assembly [GO:0010387]; multicellular organism development [GO:0007275]; negative regulation of photomorphogenesis [GO:0010100]; positive regulation of G2/M transition of mitotic cell cycle [GO:0010971]; positive regulation of protein catabolic process [GO:0045732]; protein deneddylation [GO:0000338]; red, far-red light phototransduction [GO:0009585]; regulation of L-ascorbic acid…
CSP1	CSP1	Cold shock protein (CSP) family	cold acclimation [GO:0009631]; DNA duplex unwinding [GO:0032508]; response to cold [GO:0009409]; response to salt stress [GO:0009651]; response to water deprivation [GO:0009414]; RNA secondary structure unwinding [GO:0010501]
CSP3	AtCSP3	Cold shock protein (CSP) family	cold acclimation [GO:0009631]; DNA duplex unwinding [GO:0032508]; response to cold [GO:0009409]; unidimensional cell growth [GO:0009826]
CTL1	ARM,HOT2	Glycosyl hydrolase 19 family	cellulose biosynthetic process [GO:0030244]; cell wall macromolecule catabolic process [GO:0016998]; chitin catabolic process [GO:0006032]; ethylene-activated signaling pathway [GO:0009873]; multidimensional cell growth [GO:0009825]; regulation of salicylic acid metabolic process [GO:0010337]; response to cytokinin [GO:0009735]; response to heat [GO:0009408]; response to nitrate [GO:0010167]; res…
CTR1	CTR1,OsCTR1,TaCTR1	Protein kinase superfamily, TKL Ser/Thr protein kinase family, RAF subfamily	ethylene-activated signaling pathway [GO:0009873]; gibberellin biosynthetic process [GO:0009686]; negative regulation of ethylene-activated signaling pathway [GO:0010105]; protein autophosphorylation [GO:0046777]; regulation of post-embryonic root development [GO:2000069]; regulation of stem cell division [GO:2000035]; regulation of timing of transition from vegetative to reproductive phase [GO:0…
CUL1	CUL1,OsCUL1	Cullin family	ubiquitin-dependent protein catabolic process [GO:0006511]
CUL3A	CUL3A	Cullin family	positive regulation of flower development [GO:0009911]; response to red or far red light [GO:0009639]; ubiquitin-dependent protein catabolic process [GO:0006511]
CUL4	CUL4	Cullin family	abscisic acid-activated signaling pathway [GO:0009738]; cotyledon development [GO:0048825]; DNA repair [GO:0006281]; flower development [GO:0009908]; fruit development [GO:0010154]; hormone-mediated signaling pathway [GO:0009755]; leaf development [GO:0048366]; negative regulation of photomorphogenesis [GO:0010100]; photomorphogenesis [GO:0009640]; protein polyubiquitination [GO:0000209]; shoot s…
CUT1	CER6,CsKCS6,HvKCS6	Thiolase-like superfamily, Chalcone/stilbene synthases family	fatty acid biosynthetic process [GO:0006633]; response to cold [GO:0009409]; response to light stimulus [GO:0009416]; unidimensional cell growth [GO:0009826]; wax biosynthetic process [GO:0010025]
CW18	LTP2	Plant LTP family, B11E subfamily	cuticle development [GO:0042335]; phospholipid transfer to membrane [GO:0006649]; plant epidermal cell differentiation [GO:0090627]; regulation of cutin biosynthetic process [GO:1901957]; response to water deprivation [GO:0009414],lipid transport [GO:0006869]
CWINV3	MeCWINV3	Glycosyl hydrolase 32 family	carbohydrate metabolic process [GO:0005975]
CYCA1-2	TAM	Cyclin family, Cyclin AB subfamily	cell division [GO:0051301]; male meiotic nuclear division [GO:0007140]; meiosis II [GO:0007135]; microsporogenesis [GO:0009556]; mitotic cell cycle phase transition [GO:0044772]; protein phosphorylation [GO:0006468]; regulation of cyclin-dependent protein serine/threonine kinase activity [GO:0000079]; regulation of meiotic cell cycle [GO:0051445]
CYCH1-1	CYCH1	Cyclin family	cell cycle [GO:0007049]; cell division [GO:0051301]; phosphorylation of RNA polymerase II C-terminal domain [GO:0070816]; reactive oxygen species metabolic process [GO:0072593]; regulation of cyclin-dependent protein serine/threonine kinase activity [GO:0000079]; regulation of response to water deprivation [GO:2000070]; regulation of stomatal movement [GO:0010119]; regulation of transcription, DN…
CYP	CcCYP,CYP,OsCYP	Cyclophilin-type PPIase family	DroughtDB Tags: Ion and Osmotic Homeostasis;Stomatal Movement;Regulatory Proteins;Hormone Signaling;ABA Degradation
CYP20-3	ROC4	Cyclophilin-type PPIase family	protein refolding [GO:0042026]
CYP23	CYP23	Cyclophilin-type PPIase family
CYP51	CYP51	Cytochrome P450 family	methylation [GO:0032259]; sterol biosynthetic process [GO:0016126]
CYP707A1	CYP707A1,MdCYP707A1,AtCYP707A1	Cyclophilin-type PPIase family	DroughtDB Tags: Ion and Osmotic Homeostasis;Stomatal Movement;Regulatory Proteins;Hormone Signaling;ABA Degradation
CYP707A3	AhCYP707A3,AtCYP707A3,CYP707A3	Cytochrome P450 family	abscisic acid catabolic process [GO:0046345]; abscisic acid metabolic process [GO:0009687]; cellular response to hypoxia [GO:0071456]; oxidation-reduction process [GO:0055114]; response to red or far red light [GO:0009639]; response to water deprivation [GO:0009414]; sterol metabolic process [GO:0016125]
CYP707A4	AtCYP707A4	Cytochrome P450 family	abscisic acid catabolic process [GO:0046345]; brassinosteroid biosynthetic process [GO:0016132]; brassinosteroid homeostasis [GO:0010268]; multicellular organism development [GO:0007275]; oxidation-reduction process [GO:0055114]; sterol metabolic process [GO:0016125]
CYP71AV1	CYP71AV1	Cytochrome P450 family	sesquiterpene biosynthetic process [GO:0051762]
CYP71BL1	BdC12	Cytochrome P450 family	sesquiterpene biosynthetic process [GO:0051762]; terpenoid biosynthetic process [GO:0016114]
CYP71BL2	COS	Cytochrome P450 family	sesquiterpene biosynthetic process [GO:0051762]; terpenoid biosynthetic process [GO:0016114]
CYP71P1	SL	Cytochrome P450 family	defense response [GO:0006952]; serotonin biosynthetic process from tryptophan [GO:0006587]
CYP724B1	D11	Cytochrome P450 family	brassinosteroid biosynthetic process [GO:0016132]; brassinosteroid homeostasis [GO:0010268]; cellular iron ion homeostasis [GO:0006879]; iron ion transport [GO:0006826]; multicellular organism development [GO:0007275]; oxidation-reduction process [GO:0055114]; skotomorphogenesis [GO:0009647]; sterol metabolic process [GO:0016125]
CYP74A	CYP74,AOS,MtAOS	Cytochrome P450 family	oxylipin biosynthetic process [GO:0031408],defense response [GO:0006952]; defense response to fungus [GO:0050832]; epoxygenase P450 pathway [GO:0019373]; jasmonic acid biosynthetic process [GO:0009695]; oxidation-reduction process [GO:0055114]; oxylipin biosynthetic process [GO:0031408]; oxylipin metabolic process [GO:0031407]; response to fungus [GO:0009620]; response to jasmonic acid [GO:000975…
CYP78A5	GhKLU	Cytochrome P450 family	floral organ development [GO:0048437]; organ growth [GO:0035265]; positive regulation of cell population proliferation [GO:0008284]; positive regulation of organ growth [GO:0046622]; regulation of growth rate [GO:0040009]
CYP78A7	AtCYP78A7	Cytochrome P450 family	multicellular organism development [GO:0007275]; regulation of growth [GO:0040008]; regulation of timing of plant organ formation [GO:0090709]
CYP82A1	CYP82	Cytochrome P450 family
CYP83B1	CYP83B1,SUR2	Cytochrome P450 family	adventitious root development [GO:0048830]; defense response by callose deposition in cell wall [GO:0052544]; defense response to bacterium [GO:0042742]; indoleacetic acid biosynthetic process [GO:0009684]; indole glucosinolate biosynthetic process [GO:0009759]; induced systemic resistance [GO:0009682]; regulation of growth [GO:0040008]; response to insect [GO:0009625]; response to red light [GO:…
CYP85A1	DWARF,HvDWARF,SlDWARF,CYP85A1,SoCYP85A1,D,PvD	Cytochrome P450 family	brassinosteroid biosynthetic process [GO:0016132]; brassinosteroid homeostasis [GO:0010268]; microtubule bundle formation [GO:0001578]; multicellular organism development [GO:0007275]; oxidation-reduction process [GO:0055114]; skotomorphogenesis [GO:0009647]; sterol metabolic process [GO:0016125],brassinosteroid biosynthetic process [GO:0016132]; brassinosteroid homeostasis [GO:0010268]; multicel…
CYP85A2	CYP85A2,PaCYP85A2	Cytochrome P450 family	brassinosteroid biosynthetic process [GO:0016132]; brassinosteroid homeostasis [GO:0010268]; multicellular organism development [GO:0007275]; oxidation-reduction process [GO:0055114]; sterol metabolic process [GO:0016125]
CYP86A2	CYP86A2	Cytochrome P450 family	defense response [GO:0006952]; fatty acid metabolic process [GO:0006631]
CYP86A8	LCR	Cytochrome P450 family	fatty acid metabolic process [GO:0006631]
CYP90A1	BdCPD,CPD	Cytochrome P450 family	anther wall tapetum cell differentiation [GO:0048657]; brassinosteroid biosynthetic process [GO:0016132]; brassinosteroid homeostasis [GO:0010268]; multicellular organism development [GO:0007275]; oxidation-reduction process [GO:0055114]; pollen exine formation [GO:0010584]; positive regulation of flower development [GO:0009911]; response to UV-B [GO:0010224]; sterol metabolic process [GO:0016125]
CYP90B1	BdDWF4	Cytochrome P450 family	brassinosteroid biosynthetic process [GO:0016132]; brassinosteroid homeostasis [GO:0010268]; jasmonic acid mediated signaling pathway [GO:0009867]; leaf development [GO:0048366]; leaf shaping [GO:0010358]; multicellular organism development [GO:0007275]; oxidation-reduction process [GO:0055114]; response to brassinosteroid [GO:0009741]; response to jasmonic acid [GO:0009753]; sterol metabolic pro…
CYP90D2	BdD2,D2	Cytochrome P450 family	brassinosteroid biosynthetic process [GO:0016132]; brassinosteroid homeostasis [GO:0010268]; multicellular organism development [GO:0007275]; oxidation-reduction process [GO:0055114]; sterol metabolic process [GO:0016125]
CYP93C2	GmIFS	Cytochrome P450 family	isoflavonoid biosynthetic process [GO:0009717]
CYP93G2	OsCYP93G2	Cytochrome P450 family	flavonoid biosynthetic process [GO:0009813]
CYP94C1	CYP94C1	Cytochrome P450 family	response to wounding [GO:0009611]
CYP96A15	CsMAH1,DsMAH1	Cytochrome P450 family	wax biosynthetic process [GO:0010025]
CYP97A3	DcCYP97A3	Cytochrome P450 family	carotenoid biosynthetic process [GO:0016117]; xanthophyll biosynthetic process [GO:0016123]
CYP97C1	SlLUT1	Cytochrome P450 family	carotenoid biosynthetic process [GO:0016117]
CYP99A3	OsCYP99A3	Cytochrome P450 family	cellular response to jasmonic acid stimulus [GO:0071395]; defense response [GO:0006952]; diterpenoid metabolic process [GO:0016101]; oxidation-reduction process [GO:0055114]
CYS4	MpCYS4	Cystatin family, Phytocystatin subfamily	defense response [GO:0006952]
CYSC	CAS,OsCAS,GhCAS,C,PlC,BdC	CAS family (one gene),Cysteine synthase/cystathionine beta-synthase family	cellular response to calcium ion [GO:0071277]; de-etiolation [GO:0009704]; regulation of stomatal closure [GO:0090333],cyanide metabolic process [GO:0019499]; cysteine biosynthetic process from serine [GO:0006535]; cysteine metabolic process [GO:0006534]
CYT1	VTC1	Transferase hexapeptide repeat family	cellulose biosynthetic process [GO:0030244]; defense response to bacterium [GO:0042742]; GDP-mannose biosynthetic process [GO:0009298]; L-ascorbic acid biosynthetic process [GO:0019853]; response to ammonium ion [GO:0060359]; response to heat [GO:0009408]; response to jasmonic acid [GO:0009753]; response to ozone [GO:0010193]; response to salt stress [GO:0009651]
D1	D1,PvD1	DEFL family	defense response to fungus [GO:0050832]; killing of cells of other organism [GO:0031640]
D14	D14,FaD14,HvD14	AB hydrolase superfamily	secondary shoot formation [GO:0010223]; strigolactone biosynthetic process [GO:1901601]
D3	D3	D3 family (one gene)	auxin polar transport [GO:0009926]; cuticle development [GO:0042335]; multicellular organism development [GO:0007275]; negative regulation of seed germination [GO:0010187]; positive regulation of response to water deprivation [GO:1902584]; protein ubiquitination [GO:0016567]; regulation of meristem structural organization [GO:0009934]; regulation of shoot system morphogenesis [GO:1900618]; respon…
D53	D53	ClpA/ClpB family	protein metabolic process [GO:0019538]
D8	D8	GRAS family, DELLA subfamily	gibberellic acid mediated signaling pathway [GO:0009740]; hyperosmotic salinity response [GO:0042538]; jasmonic acid mediated signaling pathway [GO:0009867]; negative regulation of gibberellic acid mediated signaling pathway [GO:0009938]; negative regulation of seed germination [GO:0010187]; regulation of reactive oxygen species metabolic process [GO:2000377]; regulation of seed dormancy process …
DAP	DAP	Class-I pyridoxal-phosphate-dependent aminotransferase family, LL-diaminopimelate aminotransferase subfamily	lysine biosynthetic process via diaminopimelate [GO:0009089]; systemic acquired resistance, salicylic acid mediated signaling pathway [GO:0009862]
DAR2	DAR2,SlDAR2	DAR2 family (one gene)	phloem development [GO:0010088]; regulation of DNA endoreduplication [GO:0032875]; root development [GO:0048364]
DAR4	SlDAR4,CHS3	DAR4 family (one gene)	defense response [GO:0006952]; response to cold [GO:0009409]
DAT	DAT	Plant acyltransferase family	alkaloid metabolic process [GO:0009820]
DBB	DBB	TFDB_GO: DBB transcription factor	TFDB_GO: DBB transcription factor
DBP	DBP	Remorin family	defense response to virus [GO:0051607]; membrane raft localization [GO:0051665]; response to salicylic acid [GO:0009751]
DBR2	DBR2	NADH:flavin oxidoreductase/NADH oxidase family
DCAF1	DCAF1	VPRBP/DCAF1 family	embryo development ending in seed dormancy [GO:0009793]; flower development [GO:0009908]; fruit development [GO:0010154]; leaf development [GO:0048366]; phyllome development [GO:0048827]; protein ubiquitination [GO:0016567]; shoot system development [GO:0048367]
DCL	DCL	DCL family (one gene)	chloroplast organization [GO:0009658]; chloroplast rRNA processing [GO:1901259]
DCL1	HvSUS1,DCL1,AtDCL1,VvDCL1	Glycosyltransferase 1 family, Plant sucrose synthase subfamily,Helicase family, Dicer subfamily	response to carbon dioxide [GO:0010037]; sucrose metabolic process [GO:0005985],gene silencing by RNA [GO:0031047]; RNA processing [GO:0006396]; rRNA catabolic process [GO:0016075]
DCL3	DCL3,AtDCL3,VvDCL3	Helicase family, Dicer subfamily	defense response to virus [GO:0051607]; maintenance of DNA methylation [GO:0010216]; production of siRNA involved in RNA interference [GO:0030422]; production of ta-siRNAs involved in RNA interference [GO:0010267]; RNA virus induced gene silencing [GO:0051214]
DCL4	AtDCL4,DCL4	Helicase family, Dicer subfamily	DNA-templated transcription, termination [GO:0006353]; maintenance of DNA methylation [GO:0010216]; maintenance of shoot apical meristem identity [GO:0010492]; polarity specification of adaxial/abaxial axis [GO:0009944]; production of lsiRNA involved in RNA interference [GO:0010599]; production of siRNA involved in RNA interference [GO:0030422]; production of ta-siRNAs involved in RNA interferenc…
DCP5	DCP5	LSM14 family	cytoplasmic mRNA processing body assembly [GO:0033962]; deadenylation-independent decapping of nuclear-transcribed mRNA [GO:0031087]; mRNA processing [GO:0006397]; negative regulation of translation [GO:0017148]; positive regulation of cytoplasmic mRNA processing body assembly [GO:0010606]
DDB1	DDB1	TFDB_GO: DBB transcription factor	TFDB_GO: DBB transcription factor
DDS	DS	Terpene cyclase/mutase family	response to metal ion [GO:0010038]; response to molecule of fungal origin [GO:0002238]; response to vanadate(3-) [GO:1902438]; saponin biosynthetic process [GO:0016135]; triterpenoid biosynthetic process [GO:0016104]
DEGP1	DEGP1	Peptidase S1C family	photosystem II repair [GO:0010206]; protein catabolic process [GO:0030163]
DERF1	OsDERF1	drought responsive ethylene response factor (ERF)	DroughtDB Tags: Regulatory Proteins;Gene Expression;Transcription Factors;ERF
DES1	DES1	Cytochrome P450 family, 9-divinyl ether synthase subfamily	oxidation-reduction process [GO:0055114]; sterol metabolic process [GO:0016125]
DET1	dg	DET1 family	red, far-red light phototransduction [GO:0009585]
DFR1	DFR1	NAD(P)-dependent epimerase/dehydratase family, Dihydroflavonol-4-reductase subfamily	anthocyanin-containing compound biosynthetic process [GO:0009718]
DFRA	TaDFR,DFR,NtDFR,CsDFR,AtDFR,VvDFR	NAD(P)-dependent epimerase/dehydratase family, Dihydroflavonol-4-reductase subfamily	anthocyanin-containing compound biosynthetic process [GO:0009718]
DGD1	DGD1	Glycosyltransferase group 1 family, Glycosyltransferase 4 subfamily	galactolipid biosynthetic process [GO:0019375]; jasmonic acid mediated signaling pathway [GO:0009867]; lignin biosynthetic process [GO:0009809]; oxylipin biosynthetic process [GO:0031408]; photosystem I stabilization [GO:0042550]
DGD2	DGD2,VuDGD2	Glycosyltransferase group 1 family, Glycosyltransferase 4 subfamily	cellular response to phosphate starvation [GO:0016036]; galactolipid biosynthetic process [GO:0019375]; glycolipid biosynthetic process [GO:0009247]
DGK1	ZmDGK1	Eukaryotic diacylglycerol kinase family	defense response [GO:0006952]; intracellular signal transduction [GO:0035556]; protein kinase C-activating G protein-coupled receptor signaling pathway [GO:0007205]
DGK2	ZmDGK2	Eukaryotic diacylglycerol kinase family	defense response [GO:0006952]; intracellular signal transduction [GO:0035556]; leaf development [GO:0048366]; protein kinase C-activating G protein-coupled receptor signaling pathway [GO:0007205]; response to cold [GO:0009409]; response to wounding [GO:0009611]; root development [GO:0048364]
DGK3	ZmDGK3	Eukaryotic diacylglycerol kinase family	defense response [GO:0006952]; protein kinase C-activating G protein-coupled receptor signaling pathway [GO:0007205]
DGS1	DGS1	DGS1 family (one gene)	galactolipid biosynthetic process [GO:0019375]; hydrogen peroxide biosynthetic process [GO:0050665]
DHAR	DHAR,MtDHAR	GST superfamily, DHAR family, dehydroascorbate reductase	DroughtDB Function: dehydroascorbate reductase
DHDPS1	DHDPS1	DapA family	diaminopimelate biosynthetic process [GO:0019877]; lysine biosynthetic process via diaminopimelate [GO:0009089]
Dhn1	Dhn1,HaDhn1,FsDhn1	Stephanie Manual Entry	Stephanie Manual Entry
DHN1	LIP9,OsLIP9,TaDHN1,DHN1,GtDHN1,AoDHN1,SpDHN1,StDHN1,PdDHN1,AdDHN1,HbDHN1	Plant dehydrin family,Stephanie Manual Entry	cold acclimation [GO:0009631]; response to abscisic acid [GO:0009737]; response to water deprivation [GO:0009414],Stephanie Manual Entry
DHN2	TaDHN2,DHN2,GtDHN2,HbDHN2	Plant dehydrin family	response to water [GO:0009415]
DHN3	DHN3,TaDHN3,StDHN3	Plant dehydrin family	response to water [GO:0009415]
DHN4	DHN4,CdDHN4	Plant dehydrin family	response to water [GO:0009415]
DHS	DHS	Deoxyhypusine synthase family	embryo sac development [GO:0009553]; peptidyl-lysine modification to peptidyl-hypusine [GO:0008612]
DI19-7	HRB1	Di19 family	blue light signaling pathway [GO:0009785]; red light signaling pathway [GO:0010161]
DIM	HvDIM	DIMINUTO family	brassinosteroid biosynthetic process [GO:0016132]; lignin metabolic process [GO:0009808]; plant-type secondary cell wall biogenesis [GO:0009834]; steroid metabolic process [GO:0008202]; unidimensional cell growth [GO:0009826]
dioA3	Dadio5	Alpha-carbonic anhydrase family
DIP	ZmDIP,AhDIP	MIP/aquaporin (TC 1.A.8) family, TIP (TC 1.A.8.10) subfamily
DIR2	BrDIR2	Plant dirigent protein family
DJ1A	MtDJ1A	Peptidase C56 family	guanine deglycation, glyoxal removal [GO:0106046]; positive regulation of cellular response to oxidative stress [GO:1900409]; protein deglycation, glyoxal removal [GO:0036529]; response to cadmium ion [GO:0046686]
DJ1C	PdDJ1C	Peptidase C56 family	chloroplast organization [GO:0009658]; guanine deglycation, glyoxal removal [GO:0106046]; protein deglycation, glyoxal removal [GO:0036529]
DJ1D	PdDJ1D	Peptidase C56 family
DL	DL	YABBY family	carpel development [GO:0048440]; cell fate commitment [GO:0045165]; floral meristem determinacy [GO:0010582]; leaf development [GO:0048366]; meristem determinacy [GO:0010022]; specification of carpel identity [GO:0010094]; style development [GO:0048479]
DLD	GDH	FAD-binding oxidoreductase/transferase type 4 family	lactate catabolic process [GO:1903457]; methylglyoxal catabolic process [GO:0051596]
DME	DME,AtDME,HvDME,CsDME	DNA glycosylase family, DEMETER subfamily	base-excision repair [GO:0006284]; DNA methylation [GO:0006306]; embryo development ending in seed dormancy [GO:0009793]; regulation of gene expression by genetic imprinting [GO:0006349]
DML2	DML2	DNA glycosylase family, DEMETER subfamily	base-excision repair [GO:0006284]
DML3	DML3	DNA glycosylase family, DEMETER subfamily	base-excision repair [GO:0006284]; maintenance of DNA methylation [GO:0010216]
DNMT2	CsDNMT2	Class I-like SAM-binding methyltransferase superfamily, C5-methyltransferase family	methylation [GO:0032259]; negative regulation of gene expression, epigenetic [GO:0045814]; tRNA processing [GO:0008033]
Dof	Dof,MsDof,SiDof,SbDof,StDof,TaDof,CsDof,VvDof	TFDB_GO: DOF transcription factor	TFDB_GO: DOF transcription factor
DOF1	DOF1	DOF1 family (one gene)	regulation of transcription, DNA-templated [GO:0006355]
Dof14	ThDof14	TFDB_GO: DOF transcription factor	TFDB_GO: DOF transcription factor
DOG1	DOG1	DOG1 family (one gene)	abscisic acid-activated signaling pathway [GO:0009738]; regulation of seed dormancy process [GO:2000033]; seed dormancy process [GO:0010162]; sugar mediated signaling pathway [GO:0010182]; transcription, DNA-templated [GO:0006351]
DOR	DOR	DOR family (one gene)	abscisic acid-activated signaling pathway [GO:0009738]; cellular response to water deprivation [GO:0042631]; negative regulation of abscisic acid-activated signaling pathway [GO:0009788]; protein ubiquitination [GO:0016567]; regulation of stomatal movement [GO:0010119]; response to abscisic acid [GO:0009737]; response to water deprivation [GO:0009414]; stomatal movement [GO:0010118]
DPA	DPA	E2F/DP family	cell cycle [GO:0007049]; regulation of cell cycle [GO:0051726]; regulation of transcription by RNA polymerase II [GO:0006357]
DPBF3	DPBF3,AREB3,TaAREB3	BZIP family, ABI5 subfamily	abscisic acid-activated signaling pathway [GO:0009738]; response to abscisic acid [GO:0009737]
DPS	DPS	UPP synthase family	dolichol biosynthetic process [GO:0019408]; plastid membrane organization [GO:0009668]; polyprenol biosynthetic process [GO:0016094]; protein glycosylation [GO:0006486]; response to cold [GO:0009409]
DR1	CiDR1	NC2 beta/DR1 family	regulation of transcription, DNA-templated [GO:0006355]
DRB1	HYL1	DRB1 family (one gene)	leaf proximal/distal pattern formation [GO:0010589]; leaf vascular tissue pattern formation [GO:0010305]; mRNA cleavage involved in gene silencing by miRNA [GO:0035279]; pre-miRNA processing [GO:0031054]; primary miRNA processing [GO:0031053]; production of miRNAs involved in gene silencing by miRNA [GO:0035196]; production of siRNA involved in RNA interference [GO:0030422]; production of ta-siRN…
DREB	DREB,SlDREB,ZmDREB,OsDREB,ScDREB,CgDREB,GhDREB,NtDREB,ThDREB,JcDREB,DmDREB,TaDREB,PeDREB,SsDREB,PvDREB	AP2/ERF transcription factor family, ERF subfamily	DroughtDB Tags: Regulatory Proteins;Gene Expression;Transcription Factors;DREB
DREB1	DREB1,TaDREB1,NtDREB1,EgDREB1,SlDREB1,HvDREB1,AtDREB1,ScDREB1,GmDREB1,AhDREB1,ZjDREB1,GhDREB1,BrDREB1,OsDREB1,AaDREB1,FaDREB1,SmDREB1,StDREB1,LlDREB1,MbDREB1,DgDREB1,ZmDREB1	AP2/ERF transcription factor family, ERF subfamily	DroughtDB Tags: Regulatory Proteins;Gene Expression;Transcription Factors;DREB
DREB1A	TaDREB1A,OsDREB1A,DREB1A,AtDREB1A,GhDREB1A,NtDREB1A,PeDREB1A,HsDREB1A,DgDREB1A,ZmDREB1A	AP2/ERF transcription factor family, ERF subfamily	cold acclimation [GO:0009631]; positive regulation of gene expression [GO:0010628]; response to cold [GO:0009409]; response to water deprivation [GO:0009414],DroughtDB Tags: Regulatory Proteins;Gene Expression;Transcription Factors;DREB
DREB1B	TaDREB1B,OsDREB1B,DREB1B,GhDREB1B,AtDREB1B,BjDREB1B,DgDREB1B,GmDREB1B,PvDREB1B	AP2/ERF transcription factor family, ERF subfamily	cold acclimation [GO:0009631]; positive regulation of transcription, DNA-templated [GO:0045893]; response to cold [GO:0009409]
DREB1C	DREB1C,GhDREB1C,DgDREB1C,OsDREB1C,CiDREB1C,AtDREB1C,SvDREB1C	AP2/ERF transcription factor family, ERF subfamily	cold acclimation [GO:0009631]; response to cold [GO:0009409]
DREB1D	TaDREB1D,DREB1D,CcDREB1D,OsDREB1D,GmDREB1D	AP2/ERF transcription factor family, ERF subfamily	abscisic acid-activated signaling pathway [GO:0009738]; glucosinolate metabolic process [GO:0019760]
DREB1E	DDF1,VcDDF1,OsDREB1E	AP2/ERF transcription factor family, ERF subfamily	regulation of gibberellin biosynthetic process [GO:0010371]; regulation of timing of transition from vegetative to reproductive phase [GO:0048510]
DREB1F	OsDREB1F,DREB1F,PvDREB1F	AP2/ERF transcription factor family, ERF subfamily	glucosinolate metabolic process [GO:0019760]; regulation of gibberellin biosynthetic process [GO:0010371]; regulation of timing of transition from vegetative to reproductive phase [GO:0048510]; regulation of unidimensional cell growth [GO:0051510]; response to freezing [GO:0050826]; response to heat [GO:0009408]; response to water deprivation [GO:0009414]
DREB1G	OsDREB1G,DREB1G	AP2/ERF transcription factor family, ERF subfamily
DREB2	DREB2,TaDREB2,BdDREB2,FaDREB2,NtDREB2,SlDREB2,PaDREB2,PeDREB2,OsDREB2,AtDREB2,StDREB2,ScDREB2,GmDREB2,BpDREB2,HcDREB2,LcDREB2,GhDREB2,EsDREB2,HaDREB2,PsDREB2	AP2/ERF transcription factor family, ERF subfamily	DroughtDB Tags: Regulatory Proteins;Gene Expression;Transcription Factors;DREB
DREB2A	DREB2A,OsDREB2A,VuDREB2A,VrDREB2A,AtDREB2A,SlDREB2A,ZmDREB2A,GhDREB2A,SbDREB2A,PeDREB2A,CsDREB2A,PgDREB2A,JrDREB2A,FpDREB2A,EvDREB2A,DvDREB2A,PvDREB2A	AP2/ERF transcription factor family, ERF subfamily	cellular response to hypoxia [GO:0071456]; heat acclimation [GO:0010286]; positive regulation of transcription, DNA-templated [GO:0045893]; response to heat [GO:0009408]; response to hydrogen peroxide [GO:0042542]; response to UV-B [GO:0010224]; response to water deprivation [GO:0009414],positive regulation of transcription, DNA-templated [GO:0045893],DroughtDB Tags: Regulatory Proteins;Gene Expr…
DREB2B	DREB2B,OsDREB2B,EsDREB2B,TaDREB2B	AP2/ERF transcription factor family, ERF subfamily	heat acclimation [GO:0010286]; pollen development [GO:0009555]; positive regulation of transcription, DNA-templated [GO:0045893]
DREB2C	CsDREB2C,OsDREB2C,MsDREB2C,NnDREB2C,GhDREB2C,AmDREB2C,DREB2C	AP2/ERF transcription factor family, ERF subfamily	abscisic acid-activated signaling pathway [GO:0009738]; heat acclimation [GO:0010286]; positive regulation of transcription, DNA-templated [GO:0045893]; response to abscisic acid [GO:0009737]
DREB2E	OsDREB2E,DREB19	AP2/ERF transcription factor family, ERF subfamily	abscisic acid-activated signaling pathway [GO:0009738]; cellular response to heat [GO:0034605]; positive regulation of transcription, DNA-templated [GO:0045893]; response to salt stress [GO:0009651]; response to water deprivation [GO:0009414]
DREB2G	DREB2G	AP2/ERF transcription factor family, ERF subfamily	positive regulation of transcription, DNA-templated [GO:0045893]
DREB3	DREB3,NtDREB3,TaDREB3,ScDREB3,GmDREB3,AmDREB3,TINY2	AP2/ERF transcription factor family, ERF subfamily	ethylene-activated signaling pathway [GO:0009873]; positive regulation of transcription, DNA-templated [GO:0045893]
DRIP1	DRIP1,AtDRIP1	DRIP1 family (one gene)	protein autoubiquitination [GO:0051865]; protein ubiquitination [GO:0016567]; response to water deprivation [GO:0009414]
DRIP2	DRIP2,AtDRIP2	DRIP2 family (one gene)	protein autoubiquitination [GO:0051865]; protein ubiquitination [GO:0016567]; response to water deprivation [GO:0009414]
DRM3	DRM3	Class I-like SAM-binding methyltransferase superfamily, DRM-methyltransferase family	DNA methylation [GO:0006306]
DRMH1	OsDRM2	DRM1/ARP family	multicellular organism development [GO:0007275]
DRP2A	DRP2A	TRAFAC class dynamin-like GTPase superfamily, Dynamin/Fzo/YdjA family	Golgi to vacuole transport [GO:0006896]; mitochondrial fission [GO:0000266]; organelle fission [GO:0048285]
DRP2B	CF1	TRAFAC class dynamin-like GTPase superfamily, Dynamin/Fzo/YdjA family	clathrin-dependent endocytosis [GO:0072583]; mitochondrial fission [GO:0000266]; organelle fission [GO:0048285]; regulation of establishment of cell polarity [GO:2000114]; response to abscisic acid [GO:0009737]; root hair initiation [GO:0048766]
DSM	DSM	put. beta-carotene hydroxylase, ABA biosynthesis	DroughtDB Tags: Ion and Osmotic Homeostasis;Stomatal Movement;Regulatory Proteins;Hormone Signaling;ABA Biosynthesis
DSM2	DSM2	put. beta-carotene hydroxylase, ABA biosynthesis	DroughtDB Tags: Ion and Osmotic Homeostasis;Stomatal Movement;Regulatory Proteins;Hormone Signaling;ABA Biosynthesis
DTC	DTC	Mitochondrial carrier (TC 2.A.29) family	dicarboxylic acid transport [GO:0006835]; tricarboxylic acid transmembrane transport [GO:0035674]
DTM1	AtDTM1	SPCS1 family	anther wall tapetum development [GO:0048658]; pollen development [GO:0009555]; signal peptide processing [GO:0006465]
DTX33	DTX33	Multi antimicrobial extrusion (MATE) (TC 2.A.66.1) family
DTX35	DTX35	Multi antimicrobial extrusion (MATE) (TC 2.A.66.1) family	flavonoid biosynthetic process [GO:0009813]
DTX42	MATE,HvMATE,AtMATE	Multi antimicrobial extrusion (MATE) (TC 2.A.66.1) family	citrate transport [GO:0015746]; response to aluminum ion [GO:0010044]
DTX50	AtDTX50	Multi antimicrobial extrusion (MATE) (TC 2.A.66.1) family	abscisic acid transport [GO:0080168]; regulation of response to water deprivation [GO:2000070]; response to abscisic acid [GO:0009737]; root morphogenesis [GO:0010015]
DXR	DXR,PtDXR,CcDXR	DXR family	isopentenyl diphosphate biosynthetic process, methylerythritol 4-phosphate pathway involved in terpenoid biosynthetic process [GO:0051484]
DXS	DXS,PtDXS,CcDXS,OsDEF	Transketolase family, DXPS subfamily	1-deoxy-D-xylulose 5-phosphate biosynthetic process [GO:0052865]; chlorophyll biosynthetic process [GO:0015995]; isopentenyl diphosphate biosynthetic process, methylerythritol 4-phosphate pathway [GO:0019288]; terpenoid biosynthetic process [GO:0016114]; thiamine biosynthetic process [GO:0009228]
EBP1	AcEBP1,EBP1,HbEBP1,CAM1	Peptidase M24 family	auxin-activated signaling pathway [GO:0009734]; cell cycle G1/S phase transition [GO:0044843]; multicellular organism development [GO:0007275]; regulation of cell division [GO:0051302]; regulation of cell growth [GO:0001558]; rRNA processing [GO:0006364]
ECA3	OsACA6	Cation transport ATPase (P-type) (TC 3.A.3) family, Type IIA subfamily	calcium ion transport [GO:0006816]; manganese ion homeostasis [GO:0055071]; root development [GO:0048364]
ECA4	AtECA4	Cation transport ATPase (P-type) (TC 3.A.3) family, Type IIA subfamily	calcium ion transmembrane transport [GO:0070588]; cellular calcium ion homeostasis [GO:0006874]
ECR	ECR,CsECR	Steroid 5-alpha reductase family	cuticle development [GO:0042335]; sphingolipid metabolic process [GO:0006665]; trichome branching [GO:0010091]; trichome papilla formation [GO:1905499]; very long-chain fatty acid biosynthetic process [GO:0042761]; wax biosynthetic process [GO:0010025]
EDL3	EDL3	EDL3 family (one gene)	abscisic acid-activated signaling pathway [GO:0009738]; regulation of seed germination [GO:0010029]; response to abscisic acid [GO:0009737]; response to osmotic stress [GO:0006970]; response to salt stress [GO:0009651]; response to water deprivation [GO:0009414]; vegetative to reproductive phase transition of meristem [GO:0010228]
EDR1	AtEDR1,OsEDR1,EDR1	Protein kinase superfamily, TKL Ser/Thr protein kinase family, RAF subfamily	abscisic acid-activated signaling pathway [GO:0009738]; cell death [GO:0008219]; defense response to oomycetes [GO:0002229]; ethylene-activated signaling pathway [GO:0009873]; MAPK cascade [GO:0000165]; negative regulation of abscisic acid-activated signaling pathway [GO:0009788]; protein autophosphorylation [GO:0046777]; regulation of defense response to bacterium [GO:1900424]; regulation of def…
EDS1	EDS1	EDS1 family (one gene)	aerenchyma formation [GO:0010618]; defense response to Gram-negative bacterium [GO:0050829]; leaf abscission [GO:0060866]; lipid metabolic process [GO:0006629]; plant-type hypersensitive response [GO:0009626]; positive regulation of cell death [GO:0010942]; regulation of hydrogen peroxide metabolic process [GO:0010310]; response to hypoxia [GO:0001666]; response to singlet oxygen [GO:0000304]; sy…
EF1	EF1	TRAFAC class translation factor GTPase superfamily, Classic translation factor GTPase family, EF-Tu/EF-1A subfamily
EHD2	ID	EHD2 family (one gene)	long-day photoperiodism, flowering [GO:0048574]; positive regulation of transcription, DNA-templated [GO:0045893]; regulation of timing of transition from vegetative to reproductive phase [GO:0048510]; regulation of transcription, DNA-templated [GO:0006355]; short-day photoperiodism, flowering [GO:0048575]
EID1	EID1	EID1 family (one gene)	leaf development [GO:0048366]; photoperiodism, flowering [GO:0048573]; red, far-red light phototransduction [GO:0009585]; regulation of photomorphogenesis [GO:0010099]
EIF4B2	SNS	EIF-4 subunit B family
EIL	EIL	TFDB_GO: EIL transcription factor	TFDB_GO: EIL transcription factor
EIL2	OsEIL2	TFDB_GO: EIL transcription factor	TFDB_GO: EIL transcription factor
EIL3	MnEIL3	EIN3 family	ethylene-activated signaling pathway [GO:0009873]; regulation of sulfur metabolic process [GO:0042762]; regulation of transcription, DNA-templated [GO:0006355]
EIN2	EIN2	NRAMP (TC 2.A.55) family	ethylene-activated signaling pathway [GO:0009873]; regulation of ethylene-activated signaling pathway [GO:0010104],auxin-activated signaling pathway [GO:0009734]; auxin polar transport [GO:0009926]; cell division [GO:0051301]; cytokinin-activated signaling pathway [GO:0009736]; defense response by callose deposition in cell wall [GO:0052544]; defense response to bacterium [GO:0042742]; defense re…
EIN3	EIN3	EIN3 family	defense response to bacterium [GO:0042742]; ethylene-activated signaling pathway [GO:0009873]; regulation of L-ascorbic acid biosynthetic process [GO:2000082]; regulation of transcription, DNA-templated [GO:0006355]; response to ethylene [GO:0009723]; response to hypoxia [GO:0001666]; sugar mediated signaling pathway [GO:0010182]
ELF3	OsELF3	ELF3 family (one gene)	circadian rhythm [GO:0007623]; circumnutation [GO:0010031]; photoperiodism, flowering [GO:0048573]; red, far-red light phototransduction [GO:0009585]; regulation of flower development [GO:0009909]; regulation of photoperiodism, flowering [GO:2000028]; regulation of stomatal movement [GO:0010119]; response to abscisic acid [GO:0009737]; response to auxin [GO:0009733]; response to cold [GO:0009409]…
ELF4	GmELF4,ELF4	EARLY FLOWERING 4 family	entrainment of circadian clock [GO:0009649]; flower development [GO:0009908]; photoperiodism [GO:0009648]; photoperiodism, flowering [GO:0048573]; positive regulation of circadian rhythm [GO:0042753]; red, far-red light phototransduction [GO:0009585]; red or far-red light signaling pathway [GO:0010017]; regulation of flower development [GO:0009909]; response to karrikin [GO:0080167]; response to …
ELIP1	ELIP1,ELIP	ELIP/psbS family	cellular response to blue light [GO:0071483]; cellular response to far red light [GO:0071490]; cellular response to heat [GO:0034605]; cellular response to high light intensity [GO:0071486]; cellular response to red light [GO:0071491]; cellular response to UV-A [GO:0071492]; photoprotection [GO:0010117]; photosynthesis [GO:0015979]; positive regulation of seed germination [GO:0010030]; regulation…
ELIP2	ELIP2	ELIP/psbS family	cellular response to blue light [GO:0071483]; cellular response to far red light [GO:0071490]; cellular response to heat [GO:0034605]; cellular response to high light intensity [GO:0071486]; cellular response to red light [GO:0071491]; cellular response to UV-A [GO:0071492]; photoprotection [GO:0010117]; photosynthesis [GO:0015979]; positive regulation of seed germination [GO:0010030]; regulation…
ELO	GmELO	fatty acid acyl transferase-related	UniProtCopy: 5-carbamoylmethyl uridine residue modification; abscisic acid-activated signaling pathway; auxin-activated signaling pathway; cell division; cellular response to abscisic acid stimulus; fruit morphogenesis; leaf morphogenesis; negative regulation of anthocyanin metabolic process; organ growth; positive regulation of cell population proliferation; regulation of abscisic acid-activated…
ELP1	ABO1,ELO2	ELP1/IKA1 family	5-carbamoylmethyl uridine residue modification [GO:0080178]; abscisic acid-activated signaling pathway [GO:0009738]; auxin-activated signaling pathway [GO:0009734]; cell division [GO:0051301]; cellular response to abscisic acid stimulus [GO:0071215]; fruit morphogenesis [GO:0048530]; leaf morphogenesis [GO:0009965]; negative regulation of anthocyanin metabolic process [GO:0031538]; organ growth […
EM1	EM1	Small hydrophilic plant seed protein family	response to abscisic acid [GO:0009737]
EM6	AtEM6,EM6	Small hydrophilic plant seed protein family	acquisition of desiccation tolerance in seed [GO:0048700]; response to abscisic acid [GO:0009737]; seed development [GO:0048316]
ENO	ENO	Enolase family	glycolytic process [GO:0006096]
ENO2	ENO2,AtENO2	Enolase family	glycolytic process [GO:0006096]; response to abscisic acid [GO:0009737]; response to cadmium ion [GO:0046686]; response to cold [GO:0009409]; response to light stimulus [GO:0009416]
ENOD12	ENOD12	Plant proline-rich protein superfamily, ENOD12 family	nodulation [GO:0009877]
EO	EO,QR	Zinc-containing alcohol dehydrogenase family, Quinone oxidoreductase subfamily
EP2	EP2	Plant LTP family	lipid transport [GO:0006869]
EPF	EPF	Plant cysteine rich small secretory peptide family, Epidermal patterning factor subfamily	UniProtCopy: guard cell differentiation; negative regulation of stomatal complex development; plant epidermis morphogenesis; stomatal complex development
EPF1	PdEPF1,HvEPF1,OsEPF1,EPF1	Plant cysteine rich small secretory peptide family, Epidermal patterning factor subfamily	guard cell differentiation [GO:0010052]; negative regulation of stomatal complex development [GO:2000122]; stomatal complex development [GO:0010374]; stomatal complex patterning [GO:0010375]
EPFL9	STOMAGEN	Plant cysteine rich small secretory peptide family, Epidermal patterning factor subfamily	cell-cell signaling [GO:0007267]; guard cell differentiation [GO:0010052]; positive regulation of stomatal complex development [GO:2000123]; regulation of stomatal complex development [GO:2000038]; stomatal complex development [GO:0010374]; stomatal complex patterning [GO:0010375]
ERD	ERD,ZmERD	chloroplast-targeted Clp protease reg SU	DroughtDB Tags: Detoxification;Functional Proteins;Proteases
ERD10	ERD10,AtERD10,NtERD10	Plant dehydrin family	cold acclimation [GO:0009631]; protein stabilization [GO:0050821]; regulation of membrane permeability [GO:0090559]; regulation of seed germination [GO:0010029]; response to abscisic acid [GO:0009737]; response to cold [GO:0009409]; response to water deprivation [GO:0009414]
ERD14	GmERD14,ERD14	Plant dehydrin family	cold acclimation [GO:0009631]; protein stabilization [GO:0050821]; regulation of membrane permeability [GO:0090559]; response to abscisic acid [GO:0009737]; response to cold [GO:0009409]; response to desiccation [GO:0009269]; response to water deprivation [GO:0009414]
ERD15	AtERD15,SpERD15,ERD15,CaERD15,IbERD15,VaERD15	ERD15 family (one gene)	cellular response to hypoxia [GO:0071456]; response to bacterium [GO:0009617]; response to high light intensity [GO:0009644]; response to water deprivation [GO:0009414]
ERD3	ERD3,AtERD3,ZmERD3	Methyltransferase superfamily	methylation [GO:0032259]
ERD4	ERD4,BjERD4	CSC1 (TC 1.A.17) family
ERD7	ERD7	ERD7 family (one gene)	circadian rhythm [GO:0007623]; response to abscisic acid [GO:0009737]; response to cold [GO:0009409]; response to high light intensity [GO:0009644]; response to salt stress [GO:0009651]; response to water deprivation [GO:0009414]
ERDJ2A	BdC21	ERDJ2A family (one gene)	posttranslational protein targeting to endoplasmic reticulum membrane [GO:0006620]; SRP-dependent cotranslational protein targeting to membrane [GO:0006614]
ERDJ2B	C29	ERDJ2B family (one gene)	posttranslational protein targeting to endoplasmic reticulum membrane [GO:0006620]; SRP-dependent cotranslational protein targeting to membrane [GO:0006614]
ERE	ZmERE,ERE	Stephanie Manual Entry	Stephanie Manual Entry
EREBP1	OsEREBP1,NtEREBP1,EREBP1	Ethylene-response factor family, Class 1 subfamily	defense response [GO:0006952]
ERECTA	ERECTA,PvERECTA,VvERECTA,ER,GmER	Protein kinase superfamily, Ser/Thr protein kinase family	cellular heat acclimation [GO:0070370]; defense response to bacterium [GO:0042742]; defense response to fungus [GO:0050832]; hormone-mediated signaling pathway [GO:0009755]; inflorescence morphogenesis [GO:0048281]; leaf morphogenesis [GO:0009965]; phloem or xylem histogenesis [GO:0010087]; plant-type cell wall organization [GO:0009664]; polarity specification of adaxial/abaxial axis [GO:0009944]…
ERF	ERF,MeERF,GhERF,MsERF,LcERF,OsERF,JcERF,StERF,AtERF,HuERF,VfERF,ZmERF	AP2/ERF transcription factor family, ERF subfamily	DroughtDB Tags: Regulatory Proteins;Gene Expression;Transcription Factors;AP2-Domain
ERF008	MsERF008,AhERF008	AP2/ERF transcription factor family, ERF subfamily	ethylene-activated signaling pathway [GO:0009873]
ERF011	JcERF011	AP2/ERF transcription factor family, ERF subfamily	defense response to bacterium [GO:0042742]; ethylene-activated signaling pathway [GO:0009873]; regulation of cell death [GO:0010941]; response to bacterium [GO:0009617]; response to chitin [GO:0010200]; response to cold [GO:0009409]
ERF012	DREB26	AP2/ERF transcription factor family, ERF subfamily	cellular response to freezing [GO:0071497]; cellular response to heat [GO:0034605]; ethylene-activated signaling pathway [GO:0009873]; positive regulation of transcription, DNA-templated [GO:0045893]; response to jasmonic acid [GO:0009753]; response to salicylic acid [GO:0009751]
ERF019	AtERF019,AhERF019	AP2/ERF transcription factor family, ERF subfamily	cellular response to water deprivation [GO:0042631]; ethylene-activated signaling pathway [GO:0009873]
ERF023	ERF023	AP2/ERF transcription factor family, ERF subfamily	ethylene-activated signaling pathway [GO:0009873]
ERF039	BnERF039	AP2/ERF transcription factor family, ERF subfamily	ethylene-activated signaling pathway [GO:0009873]
ERF053	CmERF053	AP2/ERF transcription factor family, ERF subfamily	ethylene-activated signaling pathway [GO:0009873]; positive regulation of cellular response to heat [GO:1900036]; positive regulation of transcription, DNA-templated [GO:0045893]; regulation of response to water deprivation [GO:2000070]; response to salt stress [GO:0009651]
ERF054	LcERF054	AP2/ERF transcription factor family, ERF subfamily	ethylene-activated signaling pathway [GO:0009873]; response to chitin [GO:0010200]
ERF104	OsERF104	AP2/ERF transcription factor family, ERF subfamily	cell division [GO:0051301]; defense response to fungus [GO:0050832]; ethylene-activated signaling pathway [GO:0009873]; phloem or xylem histogenesis [GO:0010087]; positive regulation of transcription, DNA-templated [GO:0045893]
ERF109	OsERF109	AP2/ERF transcription factor family, ERF subfamily	cell division [GO:0051301]; defense response to fungus [GO:0050832]; ethylene-activated signaling pathway [GO:0009873]; phloem or xylem histogenesis [GO:0010087]; regulation of auxin mediated signaling pathway [GO:0010928]; regulation of tryptophan metabolic process [GO:0090357]; response to chitin [GO:0010200]
ERF11	AtERF11	AP2/ERF transcription factor family, ERF subfamily	cell division [GO:0051301]; ethylene-activated signaling pathway [GO:0009873]; phloem or xylem histogenesis [GO:0010087]
ERF15	AtERF15	AP2/ERF transcription factor family, ERF subfamily	defense response [GO:0006952]; ethylene-activated signaling pathway [GO:0009873]; response to chitin [GO:0010200]
ERF1B	ERF1,VpERF1,SpERF1,TdERF1,TaERF1,ThERF1,GhERF1,CdERF1,OsERF1,AtERF1	AP2/ERF transcription factor family, ERF subfamily	defense response [GO:0006952]; ethylene-activated signaling pathway [GO:0009873]; jasmonic acid mediated signaling pathway [GO:0009867]
ERF2	ERF2,VpERF2,BpERF2,GhERF2,HhERF2,JcERF2,GbERF2,AtERF2,OsERF101	AP2/ERF transcription factor family, ERF subfamily	cell division [GO:0051301]; ethylene-activated signaling pathway [GO:0009873]; induced systemic resistance, jasmonic acid mediated signaling pathway [GO:0009864]; phloem or xylem histogenesis [GO:0010087]; positive regulation of transcription, DNA-templated [GO:0045893]; response to chitin [GO:0010200]
ERF3	SlERF5,ERF5,NtERF5,GmERF5,AtERF5	Ethylene-response factor family, Class 3 subfamily,AP2/ERF transcription factor family, ERF subfamily, Class 2 subfamily	defense response [GO:0006952]; ethylene-activated signaling pathway [GO:0009873],defense response [GO:0006952]; ethylene-activated signaling pathway [GO:0009873]; response to chitin [GO:0010200]; response to cold [GO:0009409],DroughtDB Tags: Regulatory Proteins;Gene Expression;Transcription Factors;AP2-Domain
ERF38	AtERF38,GhERF38,MdERF38	TFDB_GO: ERF transcription factor	TFDB_GO: ERF transcription factor
ERF4	VpERF3,TaERF3,OsERF3,GmERF3,GhERF3,ZmERF3,AtERF3,ERF3	AP2/ERF transcription factor family, ERF subfamily,Ethylene-response factor family, Class 2 subfamily	defense response [GO:0006952]; ethylene-activated signaling pathway [GO:0009873]; negative regulation of ethylene-activated signaling pathway [GO:0010105],defense response [GO:0006952]; ethylene-activated signaling pathway [GO:0009873],DroughtDB Tags: Regulatory Proteins;Gene Expression;Transcription Factors;AP2-Domain
ERF5	AtERF4,BrERF4,ERF4,TaERF4,GmERF4,GhERF4	AP2/ERF transcription factor family, ERF subfamily,Ethylene-response factor family, Class 2 subfamily, Class 3 subfamily,TFDB_GO: ERF transcription factor	cellular response to hypoxia [GO:0071456]; ethylene-activated signaling pathway [GO:0009873]; induced systemic resistance, jasmonic acid mediated signaling pathway [GO:0009864]; negative regulation of ethylene-activated signaling pathway [GO:0010105]; negative regulation of transcription, DNA-templated [GO:0045892]; response to abscisic acid [GO:0009737]; response to chitin [GO:0010200]; response…
ERF53	AtERF53	TFDB_GO: ERF transcription factor	TFDB_GO: ERF transcription factor
ERF6	ERF6,GhERF6	AP2/ERF transcription factor family, ERF subfamily	cell division [GO:0051301]; defense response [GO:0006952]; ethylene-activated signaling pathway [GO:0009873]; phloem or xylem histogenesis [GO:0010087]; response to chitin [GO:0010200]; response to high light intensity [GO:0009644]; response to nematode [GO:0009624]; response to reactive oxygen species [GO:0000302]
ERF7	GmERF7,AtERF7	AP2/ERF transcription factor family, ERF subfamily	defense response [GO:0006952]; ethylene-activated signaling pathway [GO:0009873]; negative regulation of transcription, DNA-templated [GO:0045892]; regulation of transcription, DNA-templated [GO:0006355]; response to abscisic acid [GO:0009737]; response to water deprivation [GO:0009414]
ERF71	OsERF71	TFDB_GO: ERF transcription factor	TFDB_GO: ERF transcription factor
ERL2	VvERL2	Protein kinase superfamily, Ser/Thr protein kinase family	embryo sac development [GO:0009553]; hormone-mediated signaling pathway [GO:0009755]; plant ovule development [GO:0048481]; stomatal complex morphogenesis [GO:0010103]
ERN1	ERN	AP2/ERF transcription factor family, ERF subfamily	nodulation [GO:0009877]; positive regulation of transcription, DNA-templated [GO:0045893]
ESK1	ESK1	PC-esterase family, TBL subfamily	positive regulation of transcription, DNA-templated [GO:0045893]; response to cold [GO:0009409]; response to freezing [GO:0050826]; xylan biosynthetic process [GO:0045492]
ESL1	ESL1	Major facilitator superfamily, Sugar transporter (TC 2.A.1.1) family	glucose import [GO:0046323]; monosaccharide transmembrane transport [GO:0015749]; response to abscisic acid [GO:0009737]; response to salt stress [GO:0009651]; response to water deprivation [GO:0009414]
ET	ET	ET family (one gene)	regulation of transcription, DNA-templated [GO:0006355]
ETC3	CPL3	ETC3 family (one gene)	cell differentiation [GO:0030154]; root hair cell differentiation [GO:0048765]; trichome differentiation [GO:0010026]; vegetative to reproductive phase transition of meristem [GO:0010228]
EULS3	EULS3,OsEULS3	EULS3 family (one gene)	defense response to bacterium [GO:0042742]; stomatal closure [GO:0090332]
EVP1	EVP1	vacuolar pyrophosphatase	DroughtDB Tags: Growth Control;Root/Leaf Development;Regulatory Proteins;Acid Anhydride Hydrolases
EXPA1	AnEXPA1,NtEXPA1,EXPA1,SoEXPA1,ShEXPA1,OsEXP1	Expansin family, Expansin A subfamily	plant-type cell wall organization [GO:0009664]
EXPA11	NtEXPA11	Expansin family, Expansin A subfamily	plant-type cell wall organization [GO:0009664]
EXPA13	EXP13	Expansin family, Expansin A subfamily	plant-type cell wall organization [GO:0009664]
EXPA2	AnEXPA2,TaEXPA2,OsEXP2	Expansin family, Expansin A subfamily	plant-type cell wall organization [GO:0009664]
EXPB1	HvEXPB1	Expansin family, Expansin B subfamily	cell wall organization [GO:0071555]; sexual reproduction [GO:0019953]
EXPB7	HvEXPB7	Expansin family, Expansin B subfamily	cell wall organization [GO:0071555]; sexual reproduction [GO:0019953]
EXT3	RSH,InRSH	Extensin family	plant-type cell wall organization [GO:0009664]
F3H	TaF3H,F3H,MdF3H,RsF3H,LcF3H,NtF3H,CsF3H	Iron/ascorbate-dependent oxidoreductase family	flavonoid biosynthetic process [GO:0009813]; response to UV-B [GO:0010224]
FAD	FAD	Fatty acid desaturase	DroughtDB Tags: Functional Proteins;Phospholipid Metabolism
FAD2	PtFAD2,PlFAD2,AhFAD2,FAD2	Fatty acid desaturase type 1 family	unsaturated fatty acid biosynthetic process [GO:0006636]
FAD3	AtFAD3,CbFAD3,FAD3,PlFAD3,BnFAD3	Fatty acid desaturase	DroughtDB Tags: Functional Proteins;Phospholipid Metabolism
FAD6	PtFAD6	Fatty acid desaturase type 1 family	fatty acid biosynthetic process [GO:0006633]; photoinhibition [GO:0010205]; unsaturated fatty acid biosynthetic process [GO:0006636]
FAD7	FAD7	Fatty acid desaturase type 1 family	fatty acid biosynthetic process [GO:0006633]; response to cold [GO:0009409]; unsaturated fatty acid biosynthetic process [GO:0006636]
FAD8	FAD8,VuFAD8	Fatty acid desaturase type 1 family	fatty acid biosynthetic process [GO:0006633]; unsaturated fatty acid biosynthetic process [GO:0006636]
FAE1	ZmFAE1	Thiolase-like superfamily, Chalcone/stilbene synthases family	fatty acid biosynthetic process [GO:0006633]
FAMA	FAMA,ZmFAMA	FAMA family (one gene)	guard cell differentiation [GO:0010052]; guard cell fate commitment [GO:0010377]; guard mother cell differentiation [GO:0010444]; negative regulation of cell division [GO:0051782]; negative regulation of histone H3-K27 methylation [GO:0061086]; positive regulation of cell differentiation [GO:0045597]; positive regulation of transcription, DNA-templated [GO:0045893]; response to low humidity [GO:0…
FAN1	ZnFAN1	FAN1 family	interstrand cross-link repair [GO:0036297]; synapsis [GO:0007129]
FAP1	FAP1	Chalcone isomerase family	fatty acid metabolic process [GO:0006631]
FAP2	FAP2	Chalcone isomerase family
FAP3	FAP3	Chalcone isomerase family	fatty acid metabolic process [GO:0006631]
FAR	FAR,TaFAR	Fatty acyl-CoA reductase family	DroughtDB Tags: Regulatory Proteins;Gene Expression;Transcription Factors;Others
FAR1	FAR1	Fatty acyl-CoA reductase family	DroughtDB Tags: Regulatory Proteins;Gene Expression;Transcription Factors;Others
FAR2	TaFAR2,MS2	Fatty acyl-CoA reductase family	lipid metabolic process [GO:0006629]; long-chain fatty-acyl-CoA metabolic process [GO:0035336]; pollen exine formation [GO:0010584]; suberin biosynthetic process [GO:0010345]
FAR3	FAR3,TaFAR3	Fatty acyl-CoA reductase family	lipid metabolic process [GO:0006629]; long-chain fatty-acyl-CoA metabolic process [GO:0035336]; suberin biosynthetic process [GO:0010345]; wax biosynthetic process [GO:0010025]
FAR4	TaFAR4	Fatty acyl-CoA reductase family	lipid metabolic process [GO:0006629]; long-chain fatty-acyl-CoA metabolic process [GO:0035336]; response to salt stress [GO:0009651]; response to wounding [GO:0009611]; suberin biosynthetic process [GO:0010345]
FAR5	TaFAR5	Fatty acyl-CoA reductase family	lipid metabolic process [GO:0006629]; long-chain fatty-acyl-CoA metabolic process [GO:0035336]; response to salt stress [GO:0009651]; response to wounding [GO:0009611]; suberin biosynthetic process [GO:0010345]
FAR6	TaFAR6	Fatty acyl-CoA reductase family	lipid metabolic process [GO:0006629]; long-chain fatty-acyl-CoA metabolic process [GO:0035336]; response to wounding [GO:0009611]; suberin biosynthetic process [GO:0010345]
FAR7	TaFAR7	Fatty acyl-CoA reductase family	lipid metabolic process [GO:0006629]; long-chain fatty-acyl-CoA metabolic process [GO:0035336]; suberin biosynthetic process [GO:0010345]
FAR8	TaFAR8	Fatty acyl-CoA reductase family	lipid metabolic process [GO:0006629]; long-chain fatty-acyl-CoA metabolic process [GO:0035336]; suberin biosynthetic process [GO:0010345]
FBA1	FBA,SpFBA,AtFBA,TaFBA1,AtFBA1	Class I fructose-bisphosphate aldolase family	fructose 1,6-bisphosphate metabolic process [GO:0030388]; gluconeogenesis [GO:0006094]; glycolytic process [GO:0006096]; root development [GO:0048364]
FBA2	AtFBA2	Class I fructose-bisphosphate aldolase family	fructose 1,6-bisphosphate metabolic process [GO:0030388]; gluconeogenesis [GO:0006094]; glycolytic process [GO:0006096]; response to abscisic acid [GO:0009737]; response to cadmium ion [GO:0046686]
FBA3	AtFBA3	Class I fructose-bisphosphate aldolase family	fructose 1,6-bisphosphate metabolic process [GO:0030388]; gluconeogenesis [GO:0006094]; glycolytic process [GO:0006096]; response to cadmium ion [GO:0046686]; response to oxidative stress [GO:0006979]
FBA4	AtFBA4	Class I fructose-bisphosphate aldolase family	fructose 1,6-bisphosphate metabolic process [GO:0030388]; gluconeogenesis [GO:0006094]; glycolytic process [GO:0006096]
FBA5	AtFBA5	Class I fructose-bisphosphate aldolase family	fructose 1,6-bisphosphate metabolic process [GO:0030388]; gluconeogenesis [GO:0006094]; glycolytic process [GO:0006096]
FBA6	AtFBA6	Class I fructose-bisphosphate aldolase family	cellular response to hypoxia [GO:0071456]; fructose 1,6-bisphosphate metabolic process [GO:0030388]; gluconeogenesis [GO:0006094]; glycolytic process [GO:0006096]; mitochondria-nucleus signaling pathway [GO:0031930]; response to cadmium ion [GO:0046686]
FBA7	AtFBA7	Class I fructose-bisphosphate aldolase family	fructose 1,6-bisphosphate metabolic process [GO:0030388]; gluconeogenesis [GO:0006094]; glycolytic process [GO:0006096]; response to hypoxia [GO:0001666]
FBA8	AtFBA8	Class I fructose-bisphosphate aldolase family	fructose 1,6-bisphosphate metabolic process [GO:0030388]; gluconeogenesis [GO:0006094]; glycolytic process [GO:0006096]; response to cadmium ion [GO:0046686]; response to karrikin [GO:0080167]
FD	FD	BZIP family	photoperiodism [GO:0009648]; positive regulation of flower development [GO:0009911]; positive regulation of transcription, DNA-templated [GO:0045893]; regulation of flower development [GO:0009909]; regulation of photoperiodism, flowering [GO:2000028]; regulation of transcription, DNA-templated [GO:0006355]
FD1	OsFD1,FD1	2Fe2S plant-type ferredoxin family	response to karrikin [GO:0080167]
FD2	FD2	2Fe2S plant-type ferredoxin family	photosynthetic acclimation [GO:0009643]; photosynthetic electron transport chain [GO:0009767]
FDH1	FDH	Thiolase-like superfamily, Chalcone/stilbene synthases family,D-isomer specific 2-hydroxyacid dehydrogenase family, FDH subfamily	fatty acid biosynthetic process [GO:0006633]; response to cold [GO:0009409]; response to karrikin [GO:0080167]; response to light stimulus [GO:0009416],formate catabolic process [GO:0042183]; response to cadmium ion [GO:0046686]
FDX3	PFD3	2Fe2S plant-type ferredoxin family	electron transport chain [GO:0022900]
FDX5	PFD5	2Fe2S plant-type ferredoxin family	response to light stimulus [GO:0009416]
FER	TaFER	Protein kinase superfamily, Ser/Thr protein kinase family	abscisic acid-activated signaling pathway [GO:0009738]; brassinosteroid mediated signaling pathway [GO:0009742]; defense response to fungus [GO:0050832]; ethylene-activated signaling pathway [GO:0009873]; negative regulation of abscisic acid-activated signaling pathway [GO:0009788]; negative regulation of cell growth [GO:0030308]; pollen tube reception [GO:0010483]; post-embryonic development [GO…
FHY3	FHY3	FHY3/FAR1 family	circadian rhythm [GO:0007623]; positive regulation of circadian rhythm [GO:0042753]; positive regulation of transcription, DNA-templated [GO:0045893]; red, far-red light phototransduction [GO:0009585]; red or far-red light signaling pathway [GO:0010017]; response to far red light [GO:0010218]
FK	FK	ERG4/ERG24 family	sterol biosynthetic process [GO:0016126]
FKBP12	FKBP12,PaFKBP12	FKBP-type PPIase family	chaperone-mediated protein folding [GO:0061077]; protein peptidyl-prolyl isomerization [GO:0000413]
FL	FL	FLO/LFY family	cell differentiation [GO:0030154]; flower development [GO:0009908]; maintenance of meristem identity [GO:0010074]; regulation of developmental vegetative growth [GO:1905613]; regulation of flower development [GO:0009909]; regulation of transcription, DNA-templated [GO:0006355]
FLA4	SOS5	Fasciclin-like AGP family	abscisic acid-activated signaling pathway [GO:0009738]; cell adhesion [GO:0007155]; mucilage biosynthetic process [GO:0010192]; mucilage biosynthetic process involved in seed coat development [GO:0048354]; multidimensional cell growth [GO:0009825]; response to salt stress [GO:0009651]
FLC	FLC,AtFLC,BrFLC	FLC family (one gene)	cell differentiation [GO:0030154]; flower development [GO:0009908]; multicellular organism development [GO:0007275]; negative regulation of flower development [GO:0009910]; positive regulation of transcription by RNA polymerase II [GO:0045944]; regulation of circadian rhythm [GO:0042752]; response to temperature stimulus [GO:0009266]; vernalization response [GO:0010048]
FLK	FLK	FLK family (one gene)	positive regulation of flower development [GO:0009911]
FLU	FLU	FLU family (one gene)
FLX	FLX	FLX family	cell differentiation [GO:0030154]; flower development [GO:0009908]
FOX1	FOX	Oxygen-dependent FAD-linked oxidoreductase family	cellular response to hypoxia [GO:0071456]
FPGS1	DFB	Folylpolyglutamate synthase family	folic acid-containing compound biosynthetic process [GO:0009396]; lignin biosynthetic process [GO:0009809]; one-carbon metabolic process [GO:0006730]; quiescent center organization [GO:1904961]; root development [GO:0048364]; root hair elongation [GO:0048767]; root meristem growth [GO:0010449]; tetrahydrofolylpolyglutamate biosynthetic process [GO:0046901]
FPS	FPS	FPP/GGPP synthase family	carotenoid biosynthetic process [GO:0016117]; farnesyl diphosphate biosynthetic process [GO:0045337]; geranyl diphosphate biosynthetic process [GO:0033384]; protein transport [GO:0015031]; response to jasmonic acid [GO:0009753]; response to molecule of fungal origin [GO:0002238]; response to salicylic acid [GO:0009751]; response to yeast [GO:0001878]; saponin biosynthetic process [GO:0016135]; tr…
FRK2	FRK2	Carbohydrate kinase PfkB family	fructose metabolic process [GO:0006000]; starch biosynthetic process [GO:0019252]
FRO7	OsFRO7	Ferric reductase (FRE) family	ion transport [GO:0006811]; oxidation-reduction process [GO:0055114]; photosynthetic electron transport chain [GO:0009767]
FSD2	CsFSD2	Iron/manganese superoxide dismutase family	oxidation-reduction process [GO:0055114]; response to UV [GO:0009411]
FST	FST	DEFL family	defense response to fungus [GO:0050832]; killing of cells of other organism [GO:0031640]
FT	FT,SbFT,ClFT,TaFT	Phosphatidylethanolamine-binding protein family	cell differentiation [GO:0030154]; flower development [GO:0009908]; meristem determinacy [GO:0010022]; photoperiodism, flowering [GO:0048573]; positive regulation of flower development [GO:0009911]; regulation of flower development [GO:0009909]; regulation of stomatal movement [GO:0010119]
FTB	ERA1,OsERA1	Protein prenyltransferase subunit beta family,farnesyltransferase	cuticle development [GO:0042335]; negative regulation of abscisic acid-activated signaling pathway [GO:0009788]; protein farnesylation [GO:0018343]; protein prenylation [GO:0018342]; regulation of meristem structural organization [GO:0009934]; response to abscisic acid [GO:0009737]; response to fungus [GO:0009620]; response to water deprivation [GO:0009414]; stomatal opening [GO:1990069],DroughtD…
FTSH1	AAA,FTSH	AAA ATPase family; Peptidase M41 family	multicellular organism development [GO:0007275]; photoinhibition [GO:0010205]; photosystem II repair [GO:0010206]; proteolysis [GO:0006508]; PSII associated light-harvesting complex II catabolic process [GO:0010304]; thylakoid membrane organization [GO:0010027]
FUM1	FUM1	Class-II fumarase/aspartase family, Fumarase subfamily	fumarate metabolic process [GO:0006106]; malate metabolic process [GO:0006108]; pollen tube development [GO:0048868]; protein tetramerization [GO:0051262]; response to oxidative stress [GO:0006979]; tricarboxylic acid cycle [GO:0006099]
FUS3	FUS3,PdFUS3	FUS3 family (one gene)	embryo development ending in seed dormancy [GO:0009793]; negative regulation of gibberellin biosynthetic process [GO:0010373]; plant organ development [GO:0099402]; positive regulation of abscisic acid-activated signaling pathway [GO:0009789]; positive regulation of abscisic acid biosynthetic process [GO:0010116]; positive regulation of cell population proliferation [GO:0008284]; regulation of em…
G6PDH	G6PDH,ScG6PDH,HbG6PDH	Glucose-6-phosphate dehydrogenase family	glucose metabolic process [GO:0006006]; pentose-phosphate shunt [GO:0006098]
G9	G9	Glycosyl hydrolase 28 family	carbohydrate metabolic process [GO:0005975]; cell wall organization [GO:0071555]
GA1	GA1,BnGA1	Terpene synthase family, Tpsc subfamily	diterpenoid biosynthetic process [GO:0016102]; gibberellic acid mediated signaling pathway [GO:0009740]; gibberellin biosynthetic process [GO:0009686]
GA2	KS,SnKS	Terpene synthase family, Tpse subfamily	diterpenoid biosynthetic process [GO:0016102]; gibberellic acid mediated signaling pathway [GO:0009740]; gibberellin biosynthetic process [GO:0009686]
GA20OX1	GA5	Iron/ascorbate-dependent oxidoreductase family, GA20OX subfamily	flower development [GO:0009908]; gibberellic acid mediated signaling pathway [GO:0009740]; gibberellin biosynthetic process [GO:0009686]; leaf development [GO:0048366]; response to gibberellin [GO:0009739]; response to light stimulus [GO:0009416]; short-day photoperiodism, flowering [GO:0048575]; unidimensional cell growth [GO:0009826]
GA3OX1	GA4	Iron/ascorbate-dependent oxidoreductase family, GA3OX subfamily	gibberellic acid mediated signaling pathway [GO:0009740]; gibberellin biosynthetic process [GO:0009686]; response to gibberellin [GO:0009739]; response to light stimulus [GO:0009416]; response to red light [GO:0010114]; response to red or far red light [GO:0009639]
GAD3	GAD3	Group II decarboxylase family	glutamate catabolic process [GO:0006538]
GAL1	GAL1	GHMP kinase family, GalK subfamily	carbohydrate phosphorylation [GO:0046835]; galactose catabolic process via UDP-galactose [GO:0033499]; galactose metabolic process [GO:0006012]
GAMT1	GAMT1,AtGAMT1	Methyltransferase superfamily, Type-7 methyltransferase family, SABATH subfamily	methylation [GO:0032259]
GAMYB	GAMYB,OsGAMYB	GAMYB family (one gene)	anther development [GO:0048653]; cell differentiation [GO:0030154]; pollen development [GO:0009555]
GAPC	GAPC	Glyceraldehyde-3-phosphate dehydrogenase family	glucose metabolic process [GO:0006006]; glycolytic process [GO:0006096]
GAPC1	GAPC1,TaGAPC1	Glyceraldehyde-3-phosphate dehydrogenase family	glucose metabolic process [GO:0006006]; glycolytic process [GO:0006096]
GAPC2	GAPC2	Glyceraldehyde-3-phosphate dehydrogenase family	glucose metabolic process [GO:0006006]; glycolytic process [GO:0006096]
GASA4	SmGASA4,OsGASA4	GASA family	cell redox homeostasis [GO:0045454]; gibberellic acid mediated signaling pathway [GO:0009740]; response to gibberellin [GO:0009739]
GASA6	GASA6	GASA family	gibberellic acid mediated signaling pathway [GO:0009740]; response to fructose [GO:0009750]; response to glucose [GO:0009749]; response to karrikin [GO:0080167]; response to sucrose [GO:0009744]
GAT	ACT1	Actin family,GPAT/DAPAT family	developmental growth [GO:0048589]; root hair elongation [GO:0048767],CDP-diacylglycerol biosynthetic process [GO:0016024]
GAT1_2.1	GAT	GPAT/DAPAT family,GAT1_2.1 family (one gene)	CDP-diacylglycerol biosynthetic process [GO:0016024],glutamine metabolic process [GO:0006541]; regulation of secondary shoot formation [GO:2000032]
GATA	GATA,OsGATA	Amidase family, GatA subfamily	glutaminyl-tRNAGln biosynthesis via transamidation [GO:0070681]; mitochondrial translation [GO:0032543]
GATA23	OsGATA23	Type IV zinc-finger family, Class B subfamily	cell differentiation [GO:0030154]; lateral root development [GO:0048527]; regulation of transcription, DNA-templated [GO:0006355]; response to light stimulus [GO:0009416]
GATA25	ZmTIFY1,ZIM	Type IV zinc-finger family, Class C subfamily	regulation of transcription, DNA-templated [GO:0006355]
GATA8	OsGATA8	Type IV zinc-finger family, Class A subfamily	cell differentiation [GO:0030154]; circadian rhythm [GO:0007623]; positive regulation of transcription, DNA-templated [GO:0045893]; seed germination [GO:0009845]
GAUT8	QUA1	Glycosyltransferase 8 family	cell adhesion [GO:0007155]; homogalacturonan biosynthetic process [GO:0010289]; pectin biosynthetic process [GO:0045489]
GBSS1	HvWAXY	Glycosyltransferase 1 family, Bacterial/plant glycogen synthase subfamily	starch biosynthetic process [GO:0019252]
GCR2	GCR2,GPCR	LanC-like protein family	abscisic acid-activated signaling pathway [GO:0009738]; maintenance of seed dormancy [GO:0010231]; regulation of abscisic acid-activated signaling pathway [GO:0009787]
GDU2	GDU2	GLUTAMINE DUMPER 1 (TC 9.B.60) family	amino acid transport [GO:0006865]; regulation of amino acid export [GO:0080143]
GEM	GEM	GEM family	histone H3-K9 methylation [GO:0051567]; regulation of epidermal cell division [GO:0010482]; root hair cell differentiation [GO:0048765]; trichome differentiation [GO:0010026]
GER5	OsGLP1	Germin family
GG1	AGG1	GG1 family (one gene)	acropetal auxin transport [GO:0010541]; defense response to fungus, incompatible interaction [GO:0009817]; G protein-coupled receptor signaling pathway [GO:0007186]; lateral root development [GO:0048527]; protein palmitoylation [GO:0018345]; protein prenylation [GO:0018342]; seed germination [GO:0009845]
GH3.12	PBS3	IAA-amido conjugating enzyme family	benzoate metabolic process [GO:0018874]; cellular response to hypoxia [GO:0071456]; defense response [GO:0006952]; defense response to bacterium [GO:0042742]; defense response to bacterium, incompatible interaction [GO:0009816]; detection of fungus [GO:0016046]; interspecies interaction between organisms [GO:0044419]; plant-type hypersensitive response [GO:0009626]; positive regulation of plant-t…
GHD7	GHD7	GHD7 family (one gene)	flower development [GO:0009908]; negative regulation of long-day photoperiodism, flowering [GO:0048579]; regulation of flower development [GO:0009909]
GHR1	GHR1	Protein kinase superfamily, Ser/Thr protein kinase family	abscisic acid-activated signaling pathway [GO:0009738]; cellular response to absence of light [GO:0071485]; cellular response to carbon dioxide [GO:0071244]; hydrogen peroxide mediated signaling pathway involved in stomatal movement [GO:1901528]; positive regulation of abscisic acid-activated signaling pathway [GO:0009789]; regulation of stomatal closure [GO:0090333]; response to abscisic acid [G…
GID1	GID1	'GDXG' lipolytic enzyme family	catabolic process [GO:0009056]; floral organ morphogenesis [GO:0048444]; gibberellic acid mediated signaling pathway [GO:0009740]; positive regulation of gibberellic acid mediated signaling pathway [GO:0009939]; raffinose family oligosaccharide biosynthetic process [GO:0010325]; response to gibberellin [GO:0009739]
GIF1	GIF,TaGIF	SS18 family	adaxial/abaxial pattern specification [GO:0009955]; cell division [GO:0051301]; cell population proliferation [GO:0008283]; cotyledon development [GO:0048825]; leaf development [GO:0048366]; positive regulation of transcription, DNA-templated [GO:0045893]; positive regulation of transcription by RNA polymerase II [GO:0045944]; regulation of gene expression [GO:0010468]
GL1-3	ZmGL1,GL1,OsGL1	GL1 family (one gene),Sterol desaturase family	cell differentiation [GO:0030154]; cell fate specification [GO:0001708]; gibberellic acid mediated signaling pathway [GO:0009740]; jasmonic acid mediated signaling pathway [GO:0009867]; regulation of protein localization [GO:0032880]; regulation of trichome morphogenesis [GO:2000039]; trichome differentiation [GO:0010026]; trichome patterning [GO:0048629],lipid biosynthetic process [GO:0008610]; …
GL1-5	CER1,CsCER1,DsCER1,BdCER1	Sterol desaturase family	anther wall tapetum development [GO:0048658]; cuticle development [GO:0042335]; cutin biosynthetic process [GO:0010143]; lipid biosynthetic process [GO:0008610]; pollen exine formation [GO:0010584]; response to abscisic acid [GO:0009737]; response to salt stress [GO:0009651]; wax biosynthetic process [GO:0010025]
GL3	GL3	GL3 family (one gene)	cell fate specification [GO:0001708]; epidermal cell fate specification [GO:0009957]; jasmonic acid mediated signaling pathway [GO:0009867]; multicellular organism development [GO:0007275]; positive regulation of anthocyanin biosynthetic process [GO:0031542]; trichome branching [GO:0010091]; trichome differentiation [GO:0010026]
GLDH	GLDH,TaGLDH	GLDH family (one gene)	L-ascorbic acid biosynthetic process [GO:0019853]
GLIP1	CaGLIP1	'GDSL' lipolytic enzyme family	defense response to bacterium [GO:0042742]; defense response to fungus [GO:0050832]; defense response to fungus, incompatible interaction [GO:0009817]; induced systemic resistance, ethylene mediated signaling pathway [GO:0009866]; jasmonic acid and ethylene-dependent systemic resistance, ethylene mediated signaling pathway [GO:0009871]; lipid catabolic process [GO:0016042]; response to fungus [GO…
GLN1-2	GSR	Glutamine synthetase family	glutamine biosynthetic process [GO:0006542]
GLP	GLP	Germin family
GLU	GLU,AtGLU,TaGLU,TuGLU	Glycosyl hydrolase 1 family	carbohydrate metabolic process [GO:0005975]; defense response [GO:0006952]; protein complex oligomerization [GO:0051259]
GLU1	GLU1	Glutamate synthase family	ammonia assimilation cycle [GO:0019676]; glutamate biosynthetic process [GO:0006537]; L-glutamate biosynthetic process [GO:0097054]; photorespiration [GO:0009853]; positive regulation of glycine hydroxymethyltransferase activity [GO:0080114]; response to light stimulus [GO:0009416]; response to sucrose [GO:0009744]
GLX2-1	GLY1	NAD-dependent glycerol-3-phosphate dehydrogenase family,Metallo-beta-lactamase superfamily, Glyoxalase II family	carbohydrate metabolic process [GO:0005975]; glycerol-3-phosphate catabolic process [GO:0046168]; glycerol-3-phosphate metabolic process [GO:0006072]; glycerolipid biosynthetic process [GO:0045017]; glycerolipid metabolic process [GO:0046486]; glycerophospholipid metabolic process [GO:0006650]; NADH oxidation [GO:0006116]; phospholipid biosynthetic process [GO:0008654]; systemic acquired resistan…
GLYR2	HbGR2,GR2,AtGR2	HIBADH-related family, NP60 subfamily
GmIF7GT1	GmIF7GT	UDP-glycosyltransferase family
GN	GN,GBF3,AtGBF3,EcGBF3	GN family (one gene),BZIP family	basipetal auxin transport [GO:0010540]; cell adhesion [GO:0007155]; cellular response to cold [GO:0070417]; cell wall organization [GO:0071555]; cytokinesis by cell plate formation [GO:0000911]; embryo development ending in seed dormancy [GO:0009793]; embryonic pattern specification [GO:0009880]; endocytosis [GO:0006897]; endosome transport via multivesicular body sorting pathway [GO:0032509]; es…
GolS	GolS,OsGolS,SiGolS,CaGolS,TaGolS	Glycosyltransferase family, Galactinol Synthase, catalyzes the first step in the biosynthesis of Raffinose Family Oligosaccharides (RFOs) from UDP-galactose	DroughtDB Tags: Detoxification;Osmolyte Production;Functional Proteins;Enzymes for Osmolyte Biosynthesis
GOLS	GOLS	Glycosyltransferase family, Galactinol Synthase, catalyzes the first step in the biosynthesis of Raffinose Family Oligosaccharides (RFOs) from UDP-galactose	DroughtDB Tags: Detoxification;Osmolyte Production;Functional Proteins;Enzymes for Osmolyte Biosynthesis
GolS1	AnGolS1,VhGolS1,CsGolS1,AtGolS1,CaGolS1,TaGolS1	Glycosyltransferase family, Galactinol Synthase, catalyzes the first step in the biosynthesis of Raffinose Family Oligosaccharides (RFOs) from UDP-galactose	DroughtDB Tags: Detoxification;Osmolyte Production;Functional Proteins;Enzymes for Osmolyte Biosynthesis
GOLS1	SiGOLS1,GOLS1	Glycosyltransferase family, Galactinol Synthase, catalyzes the first step in the biosynthesis of Raffinose Family Oligosaccharides (RFOs) from UDP-galactose	DroughtDB Tags: Detoxification;Osmolyte Production;Functional Proteins;Enzymes for Osmolyte Biosynthesis
GolS2	GolS2,DaGolS2,OsGolS2,AtGolS2,VhGolS2,CaGolS2,TaGolS2	Glycosyltransferase family, Galactinol Synthase, catalyzes the first step in the biosynthesis of Raffinose Family Oligosaccharides (RFOs) from UDP-galactose	DroughtDB Tags: Detoxification;Osmolyte Production;Functional Proteins;Enzymes for Osmolyte Biosynthesis
GOLS2	ZmGOLS2,AtGOLS2	Glycosyltransferase family, Galactinol Synthase, catalyzes the first step in the biosynthesis of Raffinose Family Oligosaccharides (RFOs) from UDP-galactose	DroughtDB Tags: Detoxification;Osmolyte Production;Functional Proteins;Enzymes for Osmolyte Biosynthesis
GOLS3	AtGOLS3	Glycosyltransferase 8 family, Galactosyltransferase subfamily	galactose metabolic process [GO:0006012]; response to cold [GO:0009409]; response to oxidative stress [GO:0006979]
GORK	GORK	Potassium channel family, Plant (TC 1.A.1.4) subfamily	ion transport [GO:0006811]; regulation of ion transmembrane transport [GO:0034765]; response to abscisic acid [GO:0009737]; response to cold [GO:0009409]; response to jasmonic acid [GO:0009753]; response to water deprivation [GO:0009414]
GOS2	GOS2	SUI1 family
GPA1	AtGPA1,GPA1	alpha subunit of heterotrimeric GTP-binding protein	DroughtDB Tags: Ion and Osmotic Homeostasis;Stomatal Movement
GPAT	GPAT,AmGPAT	GPAT/DAPAT family	CDP-diacylglycerol biosynthetic process [GO:0016024]
GPAT2	PpGPAT2	GPAT/DAPAT family	CDP-diacylglycerol biosynthetic process [GO:0016024]; cutin biosynthetic process [GO:0010143]
GPAT4	PpGPAT4	GPAT/DAPAT family	cutin biosynthetic process [GO:0010143]; phospholipid biosynthetic process [GO:0008654]
GPDH	GPDH,ZmGPDH	NAD-dependent glycerol-3-phosphate dehydrogenase family	carbohydrate metabolic process [GO:0005975]; glycerol-3-phosphate catabolic process [GO:0046168]
GPP2	GS1,TaGS1	HAD-like hydrolase superfamily, DOG/GPP family	dephosphorylation [GO:0016311]; glycerol biosynthetic process [GO:0006114]
GPX	GPX,AmGPX,NtGPX,TaGPX,MsGPX,OsGPX,PhGPX	Glutathione peroxidase family	response to oxidative stress [GO:0006979]
GPX2	CsGPX2	Glutathione peroxidase family	response to oxidative stress [GO:0006979]
GPX3	GPX3,OsGPX3	Glutathione peroxidase family	abscisic acid-activated signaling pathway [GO:0009738]; cellular response to water deprivation [GO:0042631]; response to hydrogen peroxide [GO:0042542]
GPX5	GPX5,RcGPX5	Glutathione peroxidase family	embryo development ending in seed dormancy [GO:0009793]; response to oxidative stress [GO:0006979]
GR	GR,MsGR,SpGR	Class-I pyridine nucleotide-disulfide oxidoreductase family	cell redox homeostasis [GO:0045454]; glutathione metabolic process [GO:0006749]
GR1	GR1,AtGR1	GR1 family (one gene)	cellular response to DNA damage stimulus [GO:0006974]; DNA double-strand break processing involved in repair via single-strand annealing [GO:0010792]; double-strand break repair via homologous recombination [GO:0000724]; gamete generation [GO:0007276]; response to ionizing radiation [GO:0010212]
GRAS	GRAS,VvGRAS,CsGRAS,MeGRAS,CaGRAS	TFDB_GO: GRAS transcription factor	TFDB_GO: GRAS transcription factor
GRAS7	SlGRAS7	TFDB_GO: GRAS transcription factor	TFDB_GO: GRAS transcription factor
GRC2	RGRC2	Class-I pyridine nucleotide-disulfide oxidoreductase family	cell redox homeostasis [GO:0045454]; glutathione metabolic process [GO:0006749]
GRF	GRF,SlGRF,TaGRF	TFDB_GO: GRF transcription factor	TFDB_GO: GRF transcription factor
GRF1	GRF6,HpGRF6,NtGRF1,GRF1	14-3-3 family,GRF family,TFDB_GO: GRF transcription factor	brassinosteroid mediated signaling pathway [GO:0009742]; defense response to bacterium [GO:0042742]; positive regulation of protein catabolic process [GO:0045732]; response to cadmium ion [GO:0046686]; response to cold [GO:0009409]; response to freezing [GO:0050826],cell population proliferation [GO:0008283]; leaf development [GO:0048366]; positive regulation of transcription, DNA-templated [GO:0…
GRF11	MdGRF11	TFDB_GO: GRF transcription factor	TFDB_GO: GRF transcription factor
GRF2	GF14,GmGF14,AtGRF2	14-3-3 family,TFDB_GO: GRF transcription factor	brassinosteroid mediated signaling pathway [GO:0009742],TFDB_GO: GRF transcription factor
GRF3	RCI1A,NtGRF3,GRF3,AtGRF3	14-3-3 family,TFDB_GO: GRF transcription factor	cellular response to nitrogen starvation [GO:0006995]; cellular response to phosphate starvation [GO:0016036]; cellular response to potassium ion starvation [GO:0051365]; cold acclimation [GO:0009631]; ethylene-activated signaling pathway [GO:0009873]; regulation of metabolic process [GO:0019222]; response to cold [GO:0009409]; response to freezing [GO:0050826],TFDB_GO: GRF transcription factor
GRF4	GS2,OsGS2,TaGS2,GL2,GRF4	GRF family,HD-ZIP homeobox family, Class IV subfamily,TFDB_GO: GRF transcription factor	cell population proliferation [GO:0008283]; leaf development [GO:0048366]; positive regulation of transcription, DNA-templated [GO:0045893]; seed development [GO:0048316]; transcription, DNA-templated [GO:0006351],regulation of transcription, DNA-templated [GO:0006355],TFDB_GO: GRF transcription factor
GRF5	GRF5	TFDB_GO: GRF transcription factor	TFDB_GO: GRF transcription factor
GRF6	RCI2	14-3-3 family	brassinosteroid mediated signaling pathway [GO:0009742]; defense response to bacterium [GO:0042742]; positive regulation of protein catabolic process [GO:0045732]; response to cadmium ion [GO:0046686]; response to cold [GO:0009409]; response to freezing [GO:0050826]
GRF7	NtGRF7,GRF7	TFDB_GO: GRF transcription factor	TFDB_GO: GRF transcription factor
GRF8	NtGRF8	TFDB_GO: GRF transcription factor	TFDB_GO: GRF transcription factor
GRF9	GRF9	TFDB_GO: GRF transcription factor	TFDB_GO: GRF transcription factor
GRP0.9	CpGRP1,LpGRP1	GRP0.9 family (one gene)	cell wall organization [GO:0071555]
GRP2	AtGRP2,TaGRP2	GRP2 family (one gene)
GRXC9	GRXC9	Glutaredoxin family, CC-type subfamily	cell redox homeostasis [GO:0045454]; jasmonic acid mediated signaling pathway [GO:0009867]; negative regulation of transcription by RNA polymerase II [GO:0000122]; response to salicylic acid [GO:0009751]; salicylic acid mediated signaling pathway [GO:0009863]
GRXS17	AtGRXS17,GRXS17,OsGRXS17	Glutaredoxin family, CGFS subfamily	auxin polar transport [GO:0009926]; cell redox homeostasis [GO:0045454]; cellular iron ion homeostasis [GO:0006879]; cellular response to DNA damage stimulus [GO:0006974]; reactive oxygen species metabolic process [GO:0072593]; regulation of cell cycle [GO:0051726]; response to heat [GO:0009408]
GS	GS	Zinc-containing alcohol dehydrogenase family, Class-III subfamily	indole alkaloid metabolic process [GO:0035834]; response to jasmonic acid [GO:0009753]; response to silver ion [GO:0010272]
GSA1	GSA	Class-III pyridoxal-phosphate-dependent aminotransferase family, HemL subfamily	chlorophyll biosynthetic process [GO:0015995]; porphyrin-containing compound biosynthetic process [GO:0006779]; protoporphyrinogen IX biosynthetic process [GO:0006782]
GSH1	GCL,GSH1	Carboxylate-amine ligase family, Glutamate--cysteine ligase type 2 subfamily	defense response by callose deposition in cell wall [GO:0052544]; defense response to bacterium [GO:0042742]; defense response to bacterium, incompatible interaction [GO:0009816]; defense response to fungus [GO:0050832]; defense response to insect [GO:0002213]; flower development [GO:0009908]; glucosinolate biosynthetic process [GO:0019761]; glutathione biosynthetic process [GO:0006750]; indole p…
GST	GST,SlGST,PpGST,MeGST,GsGST,HvGST,NtGST,SbGST,GbGST,GmGST,CaGST	GST superfamily, Phi family
GST2	GST2	GST superfamily, Zeta family	aromatic amino acid family metabolic process [GO:0009072]
GST4	OsGST4,VvGST4	GST superfamily, Phi family	glutathione metabolic process [GO:0006749]; response to herbicide [GO:0009635]; response to xenobiotic stimulus [GO:0009410]
GSTF10	ERD13	GST superfamily, Phi family	glutathione metabolic process [GO:0006749]; response to cadmium ion [GO:0046686]; response to water deprivation [GO:0009414]; toxin catabolic process [GO:0009407]
GSTF11	GSTF6,TaGSTF6	GST superfamily, Phi family	defense response to bacterium [GO:0042742]; glutathione metabolic process [GO:0006749]; response to cadmium ion [GO:0046686]; response to oxidative stress [GO:0006979]; response to water deprivation [GO:0009414]; toxin catabolic process [GO:0009407],glutathione metabolic process [GO:0006749]; response to oxidative stress [GO:0006979]; toxin catabolic process [GO:0009407]
GSTF13	VvGSTF13	GST superfamily, Phi family	glutathione metabolic process [GO:0006749]; toxin catabolic process [GO:0009407]
GSTF6	ERD11,GmGST1,TaGST1,AtGST1,BrGST1	GST superfamily, Phi family, Zeta family	defense response to bacterium [GO:0042742]; glutathione metabolic process [GO:0006749]; response to cadmium ion [GO:0046686]; response to oxidative stress [GO:0006979]; response to water deprivation [GO:0009414]; toxin catabolic process [GO:0009407],aromatic amino acid family metabolic process [GO:0009072]
GSTF7	BdGSTF8	GST superfamily, Phi family	cellular response to hypoxia [GO:0071456]; defense response [GO:0006952]; defense response to bacterium [GO:0042742]; glutathione metabolic process [GO:0006749]; response to cold [GO:0009409]; response to karrikin [GO:0080167]; toxin catabolic process [GO:0009407],defense response to bacterium [GO:0042742]; defense response to fungus, incompatible interaction [GO:0009817]; glutathione metabolic p…
GSTF8	GST6	GST superfamily, Phi family	cellular response to hypoxia [GO:0071456]; defense response [GO:0006952]; defense response to bacterium [GO:0042742]; glutathione metabolic process [GO:0006749]; response to cold [GO:0009409]; response to karrikin [GO:0080167]; toxin catabolic process [GO:0009407]
GSTF9	GSTF7	GST superfamily, Phi family	defense response to bacterium [GO:0042742]; defense response to fungus, incompatible interaction [GO:0009817]; glutathione metabolic process [GO:0006749]; response to cadmium ion [GO:0046686]; toxin catabolic process [GO:0009407],defense response [GO:0006952]; defense response to bacterium [GO:0042742]; glutathione metabolic process [GO:0006749]; response to cadmium ion [GO:0046686]; response to …
GSTL1	MaGSTL1	GST superfamily, Lambda family	protein glutathionylation [GO:0010731]; response to toxic substance [GO:0009636]
GSTU	CsGSTU,GSTU	GST superfamily, Tau family	DroughtDB Tags: Detoxification;Removal of ROS;Functional Proteins;Detoxification Signaling
GSTU17	AtGSTU17,ERD9	GST superfamily, Tau family	de-etiolation [GO:0009704]; glutathione metabolic process [GO:0006749]; lateral root development [GO:0048527]; negative regulation of response to water deprivation [GO:0080148]; regulation of growth [GO:0040008]; response to growth hormone [GO:0060416]; response to karrikin [GO:0080167]; response to salt stress [GO:0009651]; toxin catabolic process [GO:0009407]
GSTU19	AtGSTU19,GST8	GST superfamily, Tau family	cellular response to water deprivation [GO:0042631]; glutathione metabolic process [GO:0006749]; response to cadmium ion [GO:0046686]; response to oxidative stress [GO:0006979]; toxin catabolic process [GO:0009407]
GSTU2	CsGSTU2,MaGSTU2	GST superfamily, Tau family	glutathione metabolic process [GO:0006749]; toxin catabolic process [GO:0009407]
GSTU25	GSTU25,AtGSTU25	GST superfamily, Tau family	2,4,6-trinitrotoluene catabolic process [GO:0046256]; glutathione metabolic process [GO:0006749]; toxin catabolic process [GO:0009407]
GSTU3	MaGSTU3	GST superfamily, Tau family	glutathione metabolic process [GO:0006749]; toxin catabolic process [GO:0009407]
GSTU4	GST22	GST superfamily, Tau family	glutathione metabolic process [GO:0006749]; positive regulation of defense response to insect [GO:1900367]; toxin catabolic process [GO:0009407]
GSTU5	CsGSTU1,PjGSTU1,MaGSTU1,PtGSTU1	GST superfamily, Tau family	glutathione metabolic process [GO:0006749]; toxin catabolic process [GO:0009407],glutathione metabolic process [GO:0006749]; response to oxidative stress [GO:0006979]; toxin catabolic process [GO:0009407]
GSTU8	MsGSTU8	GST superfamily, Tau family	glutathione metabolic process [GO:0006749]; response to cadmium ion [GO:0046686]; toxin catabolic process [GO:0009407]
GSTZ1	TaGSTZ	GST superfamily, Zeta family	glutathione metabolic process [GO:0006749]; homogentisate catabolic process [GO:1902000]; L-phenylalanine catabolic process [GO:0006559]; toxin catabolic process [GO:0009407]
GT1	GT1	UDP-glycosyltransferase family	anthocyanin-containing compound biosynthetic process [GO:0009718]
GT19	MtGT19	Glycosyltransferase 47 family	protein glycosylation [GO:0006486]
GT20	MtGT20	Glycosyltransferase 47 family	protein glycosylation [GO:0006486]
GTE10	NPX1	GTE10 family (one gene)	abscisic acid-activated signaling pathway [GO:0009738]; cellular response to potassium ion starvation [GO:0051365]; negative regulation of transcription, DNA-templated [GO:0045892]; response to abscisic acid [GO:0009737]; response to cold [GO:0009409]; response to salt stress [GO:0009651]
GTL1	GTL1,AtGTL1,PuGTL1	GTL1 family (one gene)	cellular response to water deprivation [GO:0042631]; negative regulation of cell growth [GO:0030308]; negative regulation of DNA endoreduplication [GO:0032876]; negative regulation of transcription, DNA-templated [GO:0045892]; regulation of cell size [GO:0008361]; regulation of stomatal complex development [GO:2000038]; regulation of stomatal complex patterning [GO:2000037]; response to water dep…
GWD1	R1	PEP-utilizing enzyme family	cold acclimation [GO:0009631]; response to symbiotic fungus [GO:0009610]; starch catabolic process [GO:0005983]
H1	H1	TALE/KNOX homeobox family	regulation of transcription, DNA-templated [GO:0006355]
H3	H3,CsH3	Histone H3 family
H4	H4,OsH4	Histone H4 family	nucleosome assembly [GO:0006334]
HAB	GhHAB	PP2C family	DroughtDB Tags: Ion and Osmotic Homeostasis;Regulatory Proteins;Signal Transduction;Protein Phosphatases
HAB1	HAB1,PeHAB1,AtHAB1	PP2C family	abscisic acid-activated signaling pathway [GO:0009738]
HAB2	AtHAB2,HAB2	PP2C family	abscisic acid-activated signaling pathway [GO:0009738]
HAK1	HAK1,HvHAK1,AlHAK1,OsHAK1	HAK/KUP transporter (TC 2.A.72.3) family	potassium ion transport [GO:0006813]
HAK2	HvHAK2,IbHAK2	HAK/KUP transporter (TC 2.A.72.3) family	potassium ion transport [GO:0006813]
HAK4	CsHAK4	HAK/KUP transporter (TC 2.A.72.3) family	potassium ion transport [GO:0006813]
HAT	HAT	HAT family (one gene)	post-embryonic development [GO:0009791]
HAT1	AtHAT1,HAT1	HAT1 family	chromatin silencing at telomere [GO:0006348]; histone H4 acetylation [GO:0043967]
HAT22	HAT22,GhHAT22	HD-ZIP homeobox family, Class II subfamily	abscisic acid-activated signaling pathway [GO:0009738]; response to abscisic acid [GO:0009737]; response to cytokinin [GO:0009735]; response to water deprivation [GO:0009414]
HAT3	HAT3	HD-ZIP homeobox family, Class II subfamily
HB4	OsHB4,HaHB4	Plant globin family
HD16	CKI	Protein kinase superfamily, CK1 Ser/Thr protein kinase family, Casein kinase I subfamily	flower development [GO:0009908]; gibberellic acid mediated signaling pathway [GO:0009740]; gibberellin mediated signaling pathway [GO:0010476]; peptidyl-serine phosphorylation [GO:0018105]; regulation of growth [GO:0040008]; regulation of long-day photoperiodism, flowering [GO:0048586]
HD2	HD2	Histone deacetylase HD2 family	DroughtDB Tags: Regulatory Proteins;Gene Expression;Histone Modification
HD5	BnNFYB11	NFYB/HAP3 subunit family	flower development [GO:0009908]; negative regulation of long-day photoperiodism, flowering [GO:0048579]; positive regulation of transcription, DNA-templated [GO:0045893]; positive regulation of unidimensional cell growth [GO:0051512]
HDA15	HDA15	Histone deacetylase family, HD type 2 subfamily
HDA19	HDA19,HcHDA19,BdHD1	Histone deacetylase family, HD type 1 subfamily,CONSTANS family	DNA mediated transformation [GO:0009294]; histone acetylation [GO:0016573]; histone H3 deacetylation [GO:0070932]; histone H4 deacetylation [GO:0070933]; jasmonic acid and ethylene-dependent systemic resistance [GO:0009861]; negative regulation of transcription, DNA-templated [GO:0045892]; pathogenesis [GO:0009405]; positive regulation of stem cell population maintenance [GO:1902459]; positive re…
HDA2	HcHDA2	Histone deacetylase family, HD type 3 subfamily
HDA6	HDA6,HcHDA6,AtHDA6	Histone deacetylase family, HD type 1 subfamily	embryo development ending in seed dormancy [GO:0009793]; gene silencing [GO:0016458]; histone deacetylation [GO:0016575]; histone H3 deacetylation [GO:0070932]; histone H4 deacetylation [GO:0070933]; positive regulation of transcription by RNA polymerase II [GO:0045944]; posttranscriptional gene silencing [GO:0016441]; response to abscisic acid [GO:0009737]; response to salt stress [GO:0009651]; …
HDA8	HcHDA8	Histone deacetylase family
HDA9	HDA9,HcHDA9	Histone deacetylase family, HD type 1 subfamily	histone H3 deacetylation [GO:0070932]; histone H3-K9 deacetylation [GO:1990619]; histone H4 deacetylation [GO:0070933]; negative regulation of seed germination [GO:0010187]; positive regulation of transcription by RNA polymerase II [GO:0045944]; regulation of leaf senescence [GO:1900055]
HDAC1	AtHDAC1	Histone deacetylase family, HD Type 1 subfamily	histone H3 deacetylation [GO:0070932]; histone H4 deacetylation [GO:0070933]; positive regulation of transcription by RNA polymerase II [GO:0045944]
HDAC2	HDA710	Histone deacetylase family, HD Type 1 subfamily	histone H3 deacetylation [GO:0070932]; histone H4 deacetylation [GO:0070933]; positive regulation of transcription by RNA polymerase II [GO:0045944]
HDAC3	HDA703	Histone deacetylase family, HD Type 1 subfamily	histone H3 deacetylation [GO:0070932]; histone H4 deacetylation [GO:0070933]; positive regulation of transcription by RNA polymerase II [GO:0045944]
HDG11	AtHDG11,GaHDG11,HDG11,AtEDT1	HD-ZIP homeobox family, Class IV subfamily	plant-type cell wall loosening [GO:0009828]; trichome branching [GO:0010091]
HDT2	HD2B	Histone deacetylase HD2 family	DNA mediated transformation [GO:0009294]; negative regulation of transcription, DNA-templated [GO:0045892]; polarity specification of adaxial/abaxial axis [GO:0009944]; root development [GO:0048364]; seed dormancy process [GO:0010162]
HDT3	AtHD2C,HD2C	Histone deacetylase HD2 family	chromatin organization [GO:0006325]; negative regulation of transcription, DNA-templated [GO:0045892]; response to abscisic acid [GO:0009737]; response to salt stress [GO:0009651]; response to water deprivation [GO:0009414]; seed dormancy process [GO:0010162]
HDT4	HD2D,AtHD2D	Histone deacetylase HD2 family	chromatin organization [GO:0006325]; negative regulation of transcription, DNA-templated [GO:0045892]; seed dormancy process [GO:0010162]
HEC1	HEC1	HEC1 family (one gene)	carpel formation [GO:0048462]; gynoecium development [GO:0048467]; positive regulation of transcription, DNA-templated [GO:0045893]; regulation of auxin polar transport [GO:2000012]; regulation of gene expression [GO:0010468]; regulation of transcription, DNA-templated [GO:0006355]; transmitting tissue development [GO:0010500]
HESO1	HESO1	DNA polymerase type-B-like family	regulation of gene silencing by miRNA [GO:0060964]; RNA 3' uridylation [GO:0071076]
HFR1	HFR1	HFR1 family (one gene)	abscisic acid-activated signaling pathway [GO:0009738]; blue light signaling pathway [GO:0009785]; red, far-red light phototransduction [GO:0009585]; response to far red light [GO:0010218]; response to light intensity [GO:0009642]
HHP1	HHP1	ADIPOR family	negative regulation of abscisic acid-activated signaling pathway [GO:0009788]; response to hormone [GO:0009725]; response to salt stress [GO:0009651]; response to sucrose [GO:0009744]
HIPP03	HIPP3	HIPP family	metal ion transport [GO:0030001]; negative regulation of flower development [GO:0009910]
HIPP26	HIPP26,NbHIPP26	HIPP family	heat acclimation [GO:0010286]; metal ion transport [GO:0030001]
HIPP41	OsHIPP41	HIPP family	rRNA base methylation [GO:0070475]
HIRD11	OeSRC1	KS-type dehydrin family	negative regulation of hydrogen peroxide biosynthetic process [GO:0010730]
HK1	HK1	HK1 family (one gene)	cytokinin-activated signaling pathway [GO:0009736]; protein autophosphorylation [GO:0046777]
HK3	HvHK3	HK3 family (one gene)	cellular response to abscisic acid stimulus [GO:0071215]; cellular response to cold [GO:0070417]; cellular response to phosphate starvation [GO:0016036]; cellular response to sucrose stimulus [GO:0071329]; cytokinin-activated signaling pathway [GO:0009736]; defense response to bacterium [GO:0042742]; leaf senescence [GO:0010150]; negative regulation of iron ion transport [GO:0034757]; phloem or x…
HKT	HKT,OsHKT	Stephanie Manual Entry	Stephanie Manual Entry
HLS1	HLS1	Acetyltransferase family	auxin-activated signaling pathway [GO:0009734]; photomorphogenesis [GO:0009640]; regulation of growth [GO:0040008]; response to ethylene [GO:0009723]; unidimensional cell growth [GO:0009826]
HMGB2	HMGB1	HMGB family	chromatin assembly or disassembly [GO:0006333]
HMGB3	HMGB3,HMGB2	HMGB family	chromatin assembly or disassembly [GO:0006333]
HMGB4	HMGB4	HMGB family	chromatin assembly or disassembly [GO:0006333]
HMGB5	HMGB5	HMGB family	chromatin assembly or disassembly [GO:0006333]
HMGB6	WRKY53,AtWRKY53,TcWRKY53,OsWRKY53,TaWRKY53,GmWRKY53	HMGB6 family (one gene)
HMGR1	HMGR,PtHMGR,CcHMGR	HMG-CoA reductase family	coenzyme A metabolic process [GO:0015936]; response to absence of light [GO:0009646]; response to jasmonic acid [GO:0009753]; saponin biosynthetic process [GO:0016135]; triterpenoid biosynthetic process [GO:0016104]
HO1	HO1,TaHO1	Heme oxygenase family	carotenoid biosynthetic process [GO:0016117]; cellular response to UV-C [GO:0071494]; chloroplast-nucleus signaling pathway [GO:0010019]; flavonoid biosynthetic process [GO:0009813]; heme oxidation [GO:0006788]; photosynthesis [GO:0015979]; phytochromobilin biosynthetic process [GO:0010024]; regulation of meristem growth [GO:0010075]; regulation of stomatal movement [GO:0010119],heme oxidation [G…
HOP	HOP	HOP family (one gene)	chaperone-mediated protein complex assembly [GO:0051131]
HOP1	STI	HOP1 family (one gene)	cellular response to cold [GO:0070417]; cellular response to heat [GO:0034605]; chaperone-mediated protein complex assembly [GO:0051131]; response to heat [GO:0009408]; response to unfolded protein [GO:0006986]; response to wounding [GO:0009611]
HOS1	HOS1	HOS1 family (one gene)	negative regulation of transcription, DNA-templated [GO:0045892]; protein ubiquitination [GO:0016567]; response to cold [GO:0009409]; vegetative to reproductive phase transition of meristem [GO:0010228]
HOS15	HOS15	HOS15 family (one gene)	histone deacetylation [GO:0016575]; regulation of transcription by RNA polymerase II [GO:0006357]; response to cold [GO:0009409]
HOX1	HOX1,TaHOX1	HD-ZIP homeobox family, Class II subfamily	regulation of transcription, DNA-templated [GO:0006355]
HOX10	HOX10,HaHB1,EcHB1,NtHB1,CaHB1,GhHB1	HD-ZIP homeobox family, Class III subfamily,Plant globin family
HOX2	HvHOX2	HD-ZIP homeobox family, Class II subfamily	regulation of transcription, DNA-templated [GO:0006355]
HOX9	NtHB2	Plant globin family,HD-ZIP homeobox family, Class III subfamily
HPL	MtHPL	Cytochrome P450 family	defense response [GO:0006952]; oxidation-reduction process [GO:0055114]; oxylipin biosynthetic process [GO:0031408]; sterol metabolic process [GO:0016125]
HS1	HS1	HS1 family (one gene)	defense response to bacterium [GO:0042742]; defense response to fungus [GO:0050832]; pollen tube adhesion [GO:0009865]
HSA32	AtHSA32	Phosphosulfolactate synthase family	heat acclimation [GO:0010286]; posttranscriptional regulation of gene expression [GO:0010608]; response to heat [GO:0009408]
HSF	HSF,DcHSF	TFDB_GO: HSF transcription factor	TFDB_GO: HSF transcription factor
HSFA	HSFA	Heat shock transcription factor	DroughtDB Tags: Regulatory Proteins;Gene Expression;Transcription Factors
HSFA1b	HSFA1b	HSF family, Class A subfamily	DroughtDB Tags: Regulatory Proteins;Gene Expression;Transcription Factors
HSFA1B	HSF3	HSF family, Class A subfamily	cellular response to heat [GO:0034605]; positive regulation of transcription from RNA polymerase II promoter in response to heat stress [GO:0061408]; regulation of transcription from RNA polymerase II promoter in response to stress [GO:0043618]; response to heat [GO:0009408]
HSFA2	AtHSFA2,HSFA2	HSF family, Class A subfamily	cellular response to heat [GO:0034605]; cellular response to hypoxia [GO:0071456]; cellular response to unfolded protein [GO:0034620]; heat acclimation [GO:0010286]; positive regulation of transcription, DNA-templated [GO:0045893]; positive regulation of transcription from RNA polymerase II promoter in response to heat stress [GO:0061408]; regulation of transcription from RNA polymerase II promot…
HSFA3	OsHSFA3	HSF family, Class A subfamily	cellular response to heat [GO:0034605]; positive regulation of transcription from RNA polymerase II promoter in response to heat stress [GO:0061408]; regulation of transcription, DNA-templated [GO:0006355]; regulation of transcription from RNA polymerase II promoter in response to stress [GO:0043618]; response to chitin [GO:0010200]; response to heat [GO:0009408]
HSFA6b	HSFA6b	HSF family, Class A subfamily	cellular response to heat [GO:0034605]; positive regulation of transcription from RNA polymerase II promoter in response to heat stress [GO:0061408]; regulation of transcription from RNA polymerase II promoter in response to stress [GO:0043618]
HSFB1	PgHSF4	HSF family, Class B subfamily	cellular response to heat [GO:0034605]; negative regulation of transcription, DNA-templated [GO:0045892]; positive regulation of transcription from RNA polymerase II promoter in response to heat stress [GO:0061408]; regulation of transcription from RNA polymerase II promoter in response to stress [GO:0043618]; response to heat [GO:0009408]
HSP1	HSP1	Heat shock protein 70 family	protein folding [GO:0006457]
HSP21	HSP21	Small heat shock protein (HSP20) family	chloroplast organization [GO:0009658]; regulation of transcription, DNA-templated [GO:0006355]; response to heat [GO:0009408]; response to light stimulus [GO:0009416]
HSP70-1	OsERD2	Heat shock protein 70 (TC 1.A.33) family, DnaK subfamily	cellular response to unfolded protein [GO:0034620]; chaperone cofactor-dependent protein refolding [GO:0051085]; defense response to bacterium [GO:0042742]; defense response to fungus [GO:0050832]; defense response to other organism [GO:0098542]; negative regulation of seed germination [GO:0010187]; protein refolding [GO:0042026]; response to cadmium ion [GO:0046686]; response to cold [GO:0009409…
HSP70-4	MED37C,HSP70,CsHSP70,AhHSP70,MuHSP70,MsHSP70,CgHSP70,StHSP70,CqHSP70	Heat shock protein 70 (TC 1.A.33) family, DnaK subfamily,Heat shock protein 70 family	cellular response to unfolded protein [GO:0034620]; chaperone cofactor-dependent protein refolding [GO:0051085]; protein refolding [GO:0042026]; protein ubiquitination [GO:0016567]; response to bacterium [GO:0009617]; response to cadmium ion [GO:0046686]; response to heat [GO:0009408]; response to temperature stimulus [GO:0009266]; response to unfolded protein [GO:0006986]; response to virus [GO:…
HSP90	HSP90,CsHSP90,SgHSP90,NtHSP90,CaHSP90	Heat shock protein 90 family	protein folding [GO:0006457]
HSR4	BCS1,AtBCS1	AAA ATPase family, BCS1 subfamily	cell death [GO:0008219]; plant-type hypersensitive response [GO:0009626]; response to bacterium [GO:0009617]; response to molecule of bacterial origin [GO:0002237]; response to UV [GO:0009411]; salicylic acid mediated signaling pathway [GO:0009863]
HST	HST	UbiA prenyltransferase family
HUB1	HUB1,LpHUB1	BRE1 family	cell division [GO:0051301]; defense response to fungus, incompatible interaction [GO:0009817]; histone H2B ubiquitination [GO:0033523]; histone monoubiquitination [GO:0010390]; innate immune response [GO:0045087]; leaf morphogenesis [GO:0009965]; positive regulation of cell division [GO:0051781]; protein monoubiquitination [GO:0006513]; regulation of G2/M transition of mitotic cell cycle [GO:0010…
HUB2	OsHUB2,HUB2,AtHUB2,GhHUB2	BRE1 family	flower development [GO:0009908]; histone monoubiquitination [GO:0010390]
HVA1	HVA1	LEA type 4 family
HVA22	HVA22	DP1 family	response to abscisic acid [GO:0009737]
HVA22B	HVA22B	DP1 family	hyperosmotic salinity response [GO:0042538]; response to abscisic acid [GO:0009737]
HXK1	HXK,CsHXK,CsHXK1	Hexokinase family	cellular glucose homeostasis [GO:0001678]; glycolytic process [GO:0006096]; hexose metabolic process [GO:0019318],cellular glucose homeostasis [GO:0001678]; glucose mediated signaling pathway [GO:0010255]; glycolytic process [GO:0006096]; hexose catabolic process [GO:0019320]; programmed cell death [GO:0012501]; regulation of transcription by RNA polymerase II [GO:0006357]; stomatal closure [GO:0…
HY2	HY2	HY2 family	chloroplast-nucleus signaling pathway [GO:0010019]; phytochromobilin biosynthetic process [GO:0010024]
HY5	HY5	BZIP family	abscisic acid-activated signaling pathway [GO:0009738]; gibberellic acid mediated signaling pathway [GO:0009740]; positive gravitropism [GO:0009958]; positive regulation of anthocyanin metabolic process [GO:0031539]; positive regulation of circadian rhythm [GO:0042753]; red, far-red light phototransduction [GO:0009585]; red or far-red light signaling pathway [GO:0010017]; regulation of abscisic a…
HYH	HYH	BZIP family	red, far-red light phototransduction [GO:0009585]; red or far-red light signaling pathway [GO:0010017]; regulation of photomorphogenesis [GO:0010099]; response to far red light [GO:0010218]; response to karrikin [GO:0080167]; response to red light [GO:0010114]; response to UV-B [GO:0010224]
IAA1	SbIAA1,IAA1	Aux/IAA family	auxin-activated signaling pathway [GO:0009734]; response to auxin [GO:0009733]
IAA10	IAA10	Aux/IAA family	auxin-activated signaling pathway [GO:0009734]; response to auxin [GO:0009733]; response to chitin [GO:0010200]
IAA14	ZmIAA14,AtIAA14	Aux/IAA family	auxin-activated signaling pathway [GO:0009734]; lateral root morphogenesis [GO:0010102]; negative regulation of transcription, DNA-templated [GO:0045892]; response to auxin [GO:0009733]
IAA16	MsIAA16	Aux/IAA family	auxin-activated signaling pathway [GO:0009734]; response to auxin [GO:0009733]
IAA18	VvIAA18	Aux/IAA family	auxin-activated signaling pathway [GO:0009734]; response to auxin [GO:0009733]
IAA19	IAA19	Aux/IAA family	auxin-activated signaling pathway [GO:0009734]; response to auxin [GO:0009733]; stamen filament development [GO:0080086]
IAA3	MsIAA3,TaSHY2	Aux/IAA family	auxin-activated signaling pathway [GO:0009734]; response to auxin [GO:0009733]
IAA4	IAA4	Aux/IAA family	auxin-activated signaling pathway [GO:0009734]; response to auxin [GO:0009733]
IAA5	IAA5,MsIAA5	Aux/IAA family	auxin-activated signaling pathway [GO:0009734]; response to auxin [GO:0009733]
IAA6	OsIAA6,IAA6,MsIAA6	Aux/IAA family	auxin-activated signaling pathway [GO:0009734]; de-etiolation [GO:0009704]; response to auxin [GO:0009733]
IAA7	MsIAA7,IAA7	Aux/IAA family	auxin-activated signaling pathway [GO:0009734]; gravitropism [GO:0009630]; response to auxin [GO:0009733]; response to jasmonic acid [GO:0009753]; response to water deprivation [GO:0009414]; response to wounding [GO:0009611]
IAA8	ZmIAA8,IAA8	Aux/IAA family	auxin-activated signaling pathway [GO:0009734]; negative regulation of lateral root development [GO:1901332]; regulation of transcription, DNA-templated [GO:0006355]
IAA9	MdIAA9	Aux/IAA family	auxin-activated signaling pathway [GO:0009734]; response to auxin [GO:0009733]
IAR4	IAR4	IAR4 family (one gene)	acetyl-CoA biosynthetic process from pyruvate [GO:0006086]; glycolytic process [GO:0006096]
IBH1	IBH1	BHLH protein family	brassinosteroid mediated signaling pathway [GO:0009742]; gibberellic acid mediated signaling pathway [GO:0009740]; regulation of growth [GO:0040008],brassinosteroid mediated signaling pathway [GO:0009742]; regulation of growth [GO:0040008],brassinosteroid mediated signaling pathway [GO:0009742]; regulation of growth [GO:0040008]; response to brassinosteroid [GO:0009741]; unidimensional cell growt…
IBR5	OsIBR5	Protein-tyrosine phosphatase family	abscisic acid-activated signaling pathway [GO:0009738]; auxin-activated signaling pathway [GO:0009734]; intracellular signal transduction [GO:0035556]; negative regulation of MAP kinase activity [GO:0043407]; regulation of organ growth [GO:0046620]; regulation of rate of cell growth [GO:0061388]; response to abscisic acid [GO:0009737]; response to auxin [GO:0009733]
ICME	ICME	AB hydrolase superfamily, Isoprenylcysteine methylesterase family	catabolic process [GO:0009056]
ICMTA	AtSTE14A	Class VI-like SAM-binding methyltransferase superfamily, Isoprenylcysteine carboxyl methyltransferase family	C-terminal protein methylation [GO:0006481]; flower development [GO:0009908]; negative regulation of abscisic acid-activated signaling pathway [GO:0009788]; shoot system development [GO:0048367]
ICMTB	AtSTE14B	Class VI-like SAM-binding methyltransferase superfamily, Isoprenylcysteine carboxyl methyltransferase family	C-terminal protein methylation [GO:0006481]; flower development [GO:0009908]; negative regulation of abscisic acid-activated signaling pathway [GO:0009788]; shoot system development [GO:0048367]
ICS1	ICS1	Isochorismate synthase family	defense response to bacterium [GO:0042742]; defense response to fungus [GO:0050832]; defense response to Gram-negative bacterium [GO:0050829]; leaf abscission [GO:0060866]; negative regulation of defense response [GO:0031348]; phylloquinone biosynthetic process [GO:0042372]; response to bacterium [GO:0009617]; response to cold [GO:0009409]; salicylic acid biosynthetic process [GO:0009697]; stomat…
ICS2	ICS2	Isochorismate synthase family	defense response [GO:0006952]; phylloquinone biosynthetic process [GO:0042372]; salicylic acid biosynthetic process [GO:0009697]
IDA	IDA	IDA family (one gene)	defense response to Gram-negative bacterium [GO:0050829]; floral organ abscission [GO:0010227]; lateral root morphogenesis [GO:0010102]; leaf abscission [GO:0060866]; pectin catabolic process [GO:0045490]; regulation of cell diameter [GO:0060305]; regulation of gene expression [GO:0010468]; response to ethylene [GO:0009723]
IDD16	IDD16	IDD16 family (one gene)	floral organ morphogenesis [GO:0048444]; gravitropism [GO:0009630]; leaf morphogenesis [GO:0009965]; negative regulation of stomatal complex development [GO:2000122]; positive regulation of auxin biosynthetic process [GO:0010601]; regulation of auxin polar transport [GO:2000012]; regulation of transcription, DNA-templated [GO:0006355]
ILL3	GhILL3	Peptidase M20 family	auxin metabolic process [GO:0009850]
ILL4	IAR3	Peptidase M20 family	auxin metabolic process [GO:0009850]; response to wounding [GO:0009611]
ILL6	GhILL6	Peptidase M20 family	auxin metabolic process [GO:0009850]; jasmonic acid metabolic process [GO:0009694]; regulation of systemic acquired resistance [GO:0010112]; response to jasmonic acid [GO:0009753]
ILR1	GhILR1	Peptidase M20 family	auxin metabolic process [GO:0009850]
IMT1	GmIMT1,IMT1	Class I-like SAM-binding methyltransferase superfamily, Cation-independent O-methyltransferase family	inositol metabolic process [GO:0006020]; methylation [GO:0032259]
INT1	INT1	Major facilitator superfamily, Sugar transporter (TC 2.A.1.1) family	myo-inositol transport [GO:0015798]
INT3	DlINT3	Major facilitator superfamily, Sugar transporter (TC 2.A.1.1) family	glucose import [GO:0046323]
INV2	GhINV2	Glycosyl hydrolase 32 family	carbohydrate metabolic process [GO:0005975]
INV3	INV3	Glycosyl hydrolase 32 family	carbohydrate metabolic process [GO:0005975]
IPCS1	AtIPCS1	Sphingomyelin synthase family	ceramide biosynthetic process [GO:0046513]; sphingolipid biosynthetic process [GO:0030148]
IPK	IPK	Isopentenyl phosphate kinase family	terpenoid biosynthetic process [GO:0016114]
IPK2	ThIPK2	inositol polyphosphate kinase	DroughtDB Function: inositol polyphosphate kinase
IPP1	IPP1	IPP isomerase type 1 family	chlorophyll biosynthetic process [GO:0015995]; dimethylallyl diphosphate biosynthetic process [GO:0050992]; isopentenyl diphosphate biosynthetic process [GO:0009240]; photosynthesis [GO:0015979]
IPS1	IbMIPS1,CaMIPS1,MIPS1,PeMIPS1	Myo-inositol 1-phosphate synthase family	embryo development ending in seed dormancy [GO:0009793]; inositol biosynthetic process [GO:0006021]; myo-inositol hexakisphosphate biosynthetic process [GO:0010264]; phosphatidylserine biosynthetic process [GO:0006659]; post-embryonic development [GO:0009791]
IPS2	TaMIPS2,CaMIPS2	Myo-inositol 1-phosphate synthase family	cellular response to phosphate starvation [GO:0016036]; defense response to bacterium [GO:0042742]; defense response to fungus [GO:0050832]; defense response to virus [GO:0051607]; embryo development ending in seed dormancy [GO:0009793]; inositol biosynthetic process [GO:0006021]; myo-inositol hexakisphosphate biosynthetic process [GO:0010264]; phospholipid biosynthetic process [GO:0008654]; resp…
IQD1	BrIQD1,ZmIQD1	IQD family
IRE1	IRE1	Protein kinase superfamily, Ser/Thr protein kinase family	endoplasmic reticulum unfolded protein response [GO:0030968]; IRE1-mediated unfolded protein response [GO:0036498]; mRNA processing [GO:0006397]; response to endoplasmic reticulum stress [GO:0034976]; response to unfolded protein [GO:0006986]; RNA splicing [GO:0008380]
IRX14	IRX14	Glycosyltransferase 43 family	carbohydrate metabolic process [GO:0005975]; cell wall organization [GO:0071555]; glucuronoxylan biosynthetic process [GO:0010417]; plant-type secondary cell wall biogenesis [GO:0009834]; xylan biosynthetic process [GO:0045492]
ISPD	CMS	IspD/TarI cytidylyltransferase family, IspD subfamily	isopentenyl diphosphate biosynthetic process, methylerythritol 4-phosphate pathway [GO:0019288]
ISPS	ISPS	Terpene synthase family, Tpsb subfamily
ITPK2	DSM3,OsITPK2,GmITPK2	ITPK1 family	inositol phosphorylation [GO:0052746]; inositol trisphosphate metabolic process [GO:0032957]; regulation of response to osmotic stress [GO:0047484]
IVR1	TaIVR1,IVR1	Glycosyl hydrolase 32 family	sucrose metabolic process [GO:0005985]
JA2	SlJA2	JA2 family (one gene)	regulation of transcription, DNA-templated [GO:0006355]
JAZ7	JAZ7,TaJAZ7,ClJAZ7	TIFY/JAZ family	regulation of defense response [GO:0031347]; regulation of jasmonic acid mediated signaling pathway [GO:2000022]; response to wounding [GO:0009611]
JERF1	JERF1	ethylene response factor (ERF)	DroughtDB Tags: Regulatory Proteins;Gene Expression;Transcription Factors;ERF
JMT	JMT,AtJMT	Methyltransferase superfamily, Type-7 methyltransferase family	jasmonic acid metabolic process [GO:0009694]; methylation [GO:0032259]; oxylipin biosynthetic process [GO:0031408]; response to wounding [GO:0009611]
JUB1	JUB1,AtJUB1,SlJUB1,NAC042	JUB1 family (one gene)	anthocyanin-containing compound biosynthetic process [GO:0009718]; camalexin biosynthetic process [GO:0010120]; hyperosmotic salinity response [GO:0042538]; leaf senescence [GO:0010150]; negative regulation of leaf senescence [GO:1900056]; proline biosynthetic process [GO:0006561]; trehalose biosynthetic process [GO:0005992]
KAI2	KAI2	AB hydrolase superfamily	de-etiolation [GO:0009704]; photomorphogenesis [GO:0009640]; response to karrikin [GO:0080167]
KAS2	FAB1	Thiolase-like superfamily, Beta-ketoacyl-ACP synthases family	cold acclimation [GO:0009631]; embryo development ending in seed dormancy [GO:0009793]; fatty acid biosynthetic process [GO:0006633]; unsaturated fatty acid biosynthetic process [GO:0006636]
KAT	KAT	3-ketoacyl-CoA thiloase-2, K+ channel, inward rectifying	DroughtDB Tags: Ion and Osmotic Homeostasis;Functional Proteins;Channels and Transporters;Ion Channels;Cation Channel
KAT3	OsKAT3	Potassium channel family, Plant (TC 1.A.1.4) subfamily	potassium ion transmembrane transport [GO:0071805]; regulation of ion transmembrane transport [GO:0034765]; response to nematode [GO:0009624]
KCR1	KCR1	Short-chain dehydrogenases/reductases (SDR) family	embryo development ending in seed dormancy [GO:0009793]; very long-chain fatty acid biosynthetic process [GO:0042761]
KCS16	EL2	Thiolase-like superfamily, Chalcone/stilbene synthases family	fatty acid biosynthetic process [GO:0006633]; response to light stimulus [GO:0009416]
KCS17	KCS2,CsKCS2	Thiolase-like superfamily, Chalcone/stilbene synthases family	fatty acid biosynthetic process [GO:0006633]; response to osmotic stress [GO:0006970]; response to wounding [GO:0009611]; suberin biosynthetic process [GO:0010345],fatty acid biosynthetic process [GO:0006633]
KCS19	MdKCS21	Thiolase-like superfamily, Chalcone/stilbene synthases family	fatty acid biosynthetic process [GO:0006633],fatty acid biosynthetic process [GO:0006633]; response to cold [GO:0009409]; response to light stimulus [GO:0009416]
KCS2	DAISY	Thiolase-like superfamily, Chalcone/stilbene synthases family	fatty acid biosynthetic process [GO:0006633]; response to osmotic stress [GO:0006970]; response to wounding [GO:0009611]; suberin biosynthetic process [GO:0010345]
KIN10	KIN10	Protein kinase superfamily, CAMK Ser/Thr protein kinase family, SNF1 subfamily	abscisic acid-activated signaling pathway [GO:0009738]; detection of nutrient [GO:0009594]; developmental process involved in reproduction [GO:0003006]; fatty acid biosynthetic process [GO:0006633]; intracellular signal transduction [GO:0035556]; leaf senescence [GO:0010150]; nitrate assimilation [GO:0042128]; plant organ development [GO:0099402]; positive regulation of abscisic acid-activated si…
KIN12	KIN12	Protein kinase superfamily, CAMK Ser/Thr protein kinase family, SNF1 subfamily	intracellular signal transduction [GO:0035556]; protein phosphorylation [GO:0006468]
KIN4A	BC2	TRAFAC class myosin-kinesin ATPase superfamily, Kinesin family, KIN-4 subfamily	cellulose microfibril organization [GO:0010215]; microtubule-based movement [GO:0007018]; mitotic spindle organization [GO:0007052]; plant-type cell wall biogenesis [GO:0009832]; positive regulation of transcription, DNA-templated [GO:0045893]; regulation of cell population proliferation [GO:0042127]; regulation of gibberellic acid mediated signaling pathway [GO:0009937]; regulation of growth [GO…
KLCR1	AtKLCR1,GhKLCR1	Kinesin light chain family
KN	KN	Syntaxin family	cell cycle [GO:0007049]; cell division [GO:0051301]; exocytosis [GO:0006887]; intracellular protein transport [GO:0006886]; vesicle docking [GO:0048278]; vesicle fusion [GO:0006906]
KNAT1	PpBP,CtBP,BP	TALE/KNOX homeobox family	cell fate commitment [GO:0045165]; cell fate specification [GO:0001708]; xylem and phloem pattern formation [GO:0010051]; xylem development [GO:0010089]
KO	GA3,KO	Cytochrome P450 family	ent-kaurene oxidation to kaurenoic acid [GO:0010241]; gibberellic acid mediated signaling pathway [GO:0009740]; gibberellin biosynthetic process [GO:0009686]
KPNB1	KPNB1,AtKPNB1	Importin beta family, Importin beta-1 subfamily	protein import into nucleus [GO:0006606]
KPS	KPS	Terpene synthase family, Tpsc subfamily	diterpenoid biosynthetic process [GO:0016102]
KTI12	KTI12	KTI12 family	5-carbamoylmethyl uridine residue modification [GO:0080178]; leaf development [GO:0048366]; meristem structural organization [GO:0009933]; regulation of transcription by RNA polymerase II [GO:0006357]; root meristem growth [GO:0010449]; tRNA modification [GO:0006400]; tRNA wobble uridine modification [GO:0002098]
KTI2	WSCP	Protease inhibitor I3 (leguminous Kunitz-type inhibitor) family	defense response [GO:0006952]; negative regulation of peptidase activity [GO:0010466]; regulation of cell death [GO:0010941]; regulation of pollen tube growth [GO:0080092]; response to herbivore [GO:0080027]; response to insect [GO:0009625]; response to wounding [GO:0009611]
KTI4	TPI	Protease inhibitor I3 (leguminous Kunitz-type inhibitor) family	defense response to bacterium [GO:0042742]; programmed cell death [GO:0012501]; response to hydrogen peroxide [GO:0042542]; response to insect [GO:0009625]; response to molecule of bacterial origin [GO:0002237]; response to molecule of fungal origin [GO:0002238]; response to nematode [GO:0009624]; response to salicylic acid [GO:0009751]; response to wounding [GO:0009611]
LA1	LA,LA1	LAZY family	gravitropism [GO:0009630]; regulation of auxin polar transport [GO:2000012]; regulation of growth [GO:0040008]
LAC10	OsLAC10,PeLAC10	Multicopper oxidase family	iron ion homeostasis [GO:0055072]; iron ion transport [GO:0006826]; lignin catabolic process [GO:0046274]
LAC5	TaLAC5,LAC5,LAC1	Multicopper oxidase family	iron ion homeostasis [GO:0055072]; iron ion transport [GO:0006826]; lignin catabolic process [GO:0046274]; response to copper ion [GO:0046688]
LACS1	LACS1	ATP-dependent AMP-binding enzyme family	cutin biosynthetic process [GO:0010143]; fatty acid metabolic process [GO:0006631]; wax biosynthetic process [GO:0010025]
LACS2	LACS2,OsLACS2,MdLACS2	ATP-dependent AMP-binding enzyme family	cutin biosynthetic process [GO:0010143]; defense response to fungus [GO:0050832]; fatty acid metabolic process [GO:0006631]; lateral root formation [GO:0010311]
LACS4	LACS4,MdLACS4	ATP-dependent AMP-binding enzyme family	fatty acid metabolic process [GO:0006631]
LACS7	LACS7	ATP-dependent AMP-binding enzyme family	fatty acid metabolic process [GO:0006631]; response to ozone [GO:0010193]; response to salt stress [GO:0009651]
LACS9	LACS9	ATP-dependent AMP-binding enzyme family	fatty acid metabolic process [GO:0006631]
LAF1	MYB18,SoMYB18,SsMYB18	LAF1 family (one gene)	cell differentiation [GO:0030154]; far-red light signaling pathway [GO:0010018]; positive regulation of transcription, DNA-templated [GO:0045893]; red, far-red light phototransduction [GO:0009585]; response to red or far red light [GO:0009639]
LAP1	MtPM25	Peptidase M17 family	response to cadmium ion [GO:0046686]
LAPA1	LAP,SlLAP2	Peptidase M17 family	protein hexamerization [GO:0034214]
LATE	LATE	LATE family (one gene)	flower development [GO:0009908]; negative regulation of flower development [GO:0009910]; negative regulation of long-day photoperiodism, flowering [GO:0048579]; regulation of circadian rhythm [GO:0042752]; regulation of transcription, DNA-templated [GO:0006355]
LAX1	ZmLAX,ClLAX,SbLAX,CaLAX,GmLAX,OsLAX,LAX1	BHLH protein family	multicellular organism development [GO:0007275]; positive regulation of transcription, DNA-templated [GO:0045893]; regulation of secondary shoot formation [GO:2000032]
LAX2	PtLAX2,SbLAX2	LAX2 family (one gene)	multicellular organism development [GO:0007275]; positive regulation of transcription, DNA-templated [GO:0045893]; regulation of secondary shoot formation [GO:2000032]
LBD	LBD,StLBD,SbLBD	TFDB_GO: LBD transcription factor	TFDB_GO: LBD transcription factor
LBD15	StLBD15,LBD15	LOB domain-containing protein family	positive regulation of gene expression [GO:0010628]; tracheary element differentiation [GO:1905177]
LBD26	StLBD26	LOB domain-containing protein family
LBD32	SbLBD32	LOB domain-containing protein family
LBD35	StLBD35	LOB domain-containing protein family
LBD40	LBD40,SlLBD40	LOB domain-containing protein family	regulation of gene expression [GO:0010468]; response to gibberellin [GO:0009739]
LBD6	AS2	LOB domain-containing protein family	adaxial/abaxial axis specification [GO:0009943]; petal development [GO:0048441]; polarity specification of adaxial/abaxial axis [GO:0009944]; proximal/distal pattern formation [GO:0009954]; specification of symmetry [GO:0009799],multicellular organism development [GO:0007275]
LC	LC	BHLH protein family
LCD	LCD	Class-V pyridoxal-phosphate-dependent aminotransferase family	L-cysteine catabolic process to pyruvate [GO:0019450]
LCY1	LCYB,DcLCYB	Lycopene cyclase family	carotene biosynthetic process [GO:0016120]; carotenoid biosynthetic process [GO:0016117]; ubiquinone biosynthetic process [GO:0006744]; xanthophyll biosynthetic process [GO:0016123]
LD	LD	LD family (one gene)	cell differentiation [GO:0030154]; flower development [GO:0009908]; vegetative to reproductive phase transition of meristem [GO:0010228]
LDL1	LSD1,OsLSD1	LSD1 family (one gene),Flavin monoamine oxidase family,TFDB_GO: LSD transcription factor	negative regulation of programmed cell death [GO:0043069]; plant-type hypersensitive response [GO:0009626],histone deacetylation [GO:0016575]; histone H3-K4 methylation [GO:0051568]; negative regulation of transcription, DNA-templated [GO:0045892]; root development [GO:0048364],TFDB_GO: LSD transcription factor
LDOX	LDOX,TaANS,NtANS,ANS,CsANS,MdANS	Iron/ascorbate-dependent oxidoreductase family	anthocyanin-containing compound biosynthetic process [GO:0009718]
LE	LE	Iron/ascorbate-dependent oxidoreductase family, GA3OX subfamily	gibberellin biosynthetic process [GO:0009686]
LE25	LE25	LEA type 1 family	embryo development ending in seed dormancy [GO:0009793]
LEA	LEA,CsLEA,JcLEA,IpLEA,GmLEA,TaLEA,AtLEA,StLEA,MeLEA,SmLEA,SgLEA,AdLEA,OsLEA,ThLEA,NtLEA,VfLEA,CmLEA,ClLEA,BdLEA,SvLEA,GhLEA	Plant dehydrin family	cold acclimation [GO:0009631]; response to abscisic acid [GO:0009737]; response to water deprivation [GO:0009414]
LEA14	WSI18,GmLEA14,AtLEA14,SiLEA14,LEA14,IbLEA14	LEA type 4 family
LEA17	CaLEA1,LEA1,TaLEA1,PpLEA1,AtLEA1,ThLEA1,OsLEA1	LEA type 4 family	positive regulation of response to salt stress [GO:1901002]; positive regulation of response to water deprivation [GO:1902584]; response to freezing [GO:0050826]
LEA18	BnLEA18,LEA18	LEA type 1 family	embryo development ending in seed dormancy [GO:0009793]; pollen tube development [GO:0048868]; response to osmotic stress [GO:0006970]; response to water deprivation [GO:0009414]; seed development [GO:0048316]
LEA2	LEA2,SmLEA2,GhLEA2,ZmLEA2,TaLEA2,CsLEA2,BhLEA2,OsLEA2,AtLEA3	LEA type 3 family	response to salt stress [GO:0009651]; response to water deprivation [GO:0009414]
LEA29	PmLEA29,LEA76	LEA type 4 family
LEA41	LEA41,BnLEA41,AtDI21	LEA type 3 family	cold acclimation [GO:0009631]; response to abscisic acid [GO:0009737]; response to cold [GO:0009409]; response to water deprivation [GO:0009414]
LEA6	LEA6	LEA type 1 family	embryo development ending in seed dormancy [GO:0009793]; response to osmotic stress [GO:0006970]; response to water deprivation [GO:0009414]; seed development [GO:0048316]
LEA7	StLEA7	LEA type 4 family	protein stabilization [GO:0050821]; response to freezing [GO:0050826]; response to water deprivation [GO:0009414]
LECA	PSL1	Leguminous lectin family
LEW1	LEW1	Glycosyltransferase family	DroughtDB Function: cis-prenyltransferase, involved in dolichol biosythesis
LF	LF	BHLH protein family	regulation of long-day photoperiodism, flowering [GO:0048586]; regulation of short-day photoperiodism, flowering [GO:0048587]; regulation of transcription, DNA-templated [GO:0006355]
LFY	LFY	FLO/LFY family	cell differentiation [GO:0030154]; floral meristem determinacy [GO:0010582]; flower development [GO:0009908]; gibberellic acid mediated signaling pathway [GO:0009740]; maintenance of inflorescence meristem identity [GO:0010077]
LG3	OsLG3	TALE/KNOX homeobox family	regulation of transcription, DNA-templated [GO:0006355]
LHC Ib-21	AtLHCA1	Light-harvesting chlorophyll a/b-binding (LHC) protein family	photosynthesis, light harvesting in photosystem I [GO:0009768]; protein-chromophore linkage [GO:0018298]; response to blue light [GO:0009637]; response to cold [GO:0009409]; response to far red light [GO:0010218]; response to high light intensity [GO:0009644]; response to light stimulus [GO:0009416]; response to low light intensity stimulus [GO:0009645]; response to red light [GO:0010114], light …
LHCB	LHCB	Light-harvesting chlorophyll a/b-binding (LHC) protein family	DroughtDB Tags: Ion and Osmotic Homeostasis;Stomatal Movement
LHCB1.2	CAB3	Light-harvesting chlorophyll a/b-binding (LHC) protein family	photosynthesis, light harvesting in photosystem I [GO:0009768]; protein-chromophore linkage [GO:0018298]; response to light stimulus [GO:0009416]
LHCB1.3	CAB1	Light-harvesting chlorophyll a/b-binding (LHC) protein family	photosynthesis, light harvesting in photosystem I [GO:0009768]; protein-chromophore linkage [GO:0018298]; response to light stimulus [GO:0009416]
LHCB3	LHCB3	Light-harvesting chlorophyll a/b-binding (LHC) protein family	photosynthesis [GO:0015979]; photosynthesis, light harvesting in photosystem I [GO:0009768]; photosynthesis, light harvesting in photosystem II [GO:0009769]; protein-chromophore linkage [GO:0018298]; regulation of stomatal movement [GO:0010119]; response to abscisic acid [GO:0009737]; response to herbicide [GO:0009635]; response to high light intensity [GO:0009644]; response to light stimulus [GO…
Lhcb4	TaLhcb4	Light-harvesting chlorophyll a/b-binding (LHC) protein family	photosynthesis, light harvesting [GO:0009765]; protein-chromophore linkage [GO:0018298]
LHCB5	LHCB5	Light-harvesting chlorophyll a/b-binding (LHC) protein family	nonphotochemical quenching [GO:0010196]; photosynthesis [GO:0015979]; photosynthesis, light harvesting in photosystem I [GO:0009768]; photosystem II assembly [GO:0010207]; protein-chromophore linkage [GO:0018298]; response to blue light [GO:0009637]; response to far red light [GO:0010218]; response to light stimulus [GO:0009416]; response to red light [GO:0010114]
LHCB6	LHCB6	Light-harvesting chlorophyll a/b-binding (LHC) protein family	DroughtDB Tags: Ion and Osmotic Homeostasis;Stomatal Movement
LHP1	LHP1	LHP1 family (one gene)	cell differentiation [GO:0030154]; chromatin organization [GO:0006325]; chromatin silencing [GO:0006342]; flower development [GO:0009908]; multidimensional cell growth [GO:0009825]; negative regulation of flower development [GO:0009910]; negative regulation of gene expression, epigenetic [GO:0045814]; negative regulation of molecular function, epigenetic [GO:0045857]; negative regulation of trans…
LHY	OsLHY,LHY	LHY family (one gene)	circadian rhythm [GO:0007623]; long-day photoperiodism, flowering [GO:0048574]; negative regulation of circadian rhythm [GO:0042754]; negative regulation of DNA-binding transcription factor activity [GO:0043433]; regulation of circadian rhythm [GO:0042752]; regulation of transcription, DNA-templated [GO:0006355]; response to cold [GO:0009409]
LIP	LIP	Malate synthase family	glyoxylate cycle [GO:0006097]; tricarboxylic acid cycle [GO:0006099]
LIP5	LIP5,NtLIP5	VTA1 family	defense response, incompatible interaction [GO:0009814]; late endosome to vacuole transport via multivesicular body sorting pathway [GO:0032511]; mucilage extrusion from seed coat [GO:0080001]; positive regulation of defense response to bacterium [GO:1900426]; protein transport [GO:0015031]; regulation of vacuolar transport [GO:1903335]; vesicle-mediated transport [GO:0016192]
LIR1	LRP	LIR1 family (one gene)	circadian rhythm [GO:0007623]
LKR/SDH	SDH,GhSDH	AlaDH/PNT family; Saccharopine dehydrogenase family	L-lysine catabolic process to acetyl-CoA via saccharopine [GO:0033512]
LLA23	LLA23	expression in Ath:reduced sensitivity to ABA; stomata stay open longer under drought (!) but plants are more tolerant to drought!	DroughtDB Tags: Ion and Osmotic Homeostasis;Stomatal Movement
LNG1	TRM2	LNG1 family (one gene)	regulation of monopolar cell growth [GO:0051513]; unidimensional cell growth [GO:0009826]
LOB	LOB	LOB domain-containing protein family	multicellular organism development [GO:0007275]; organ boundary specification between lateral organs and the meristem [GO:0010199]
LOG2	LOG2	RING-type zinc finger family, LOG2 subfamily	abscisic acid-activated signaling pathway involved in stomatal movement [GO:1901527]; amino acid homeostasis [GO:0080144]; protein ubiquitination [GO:0016567]; response to abscisic acid [GO:0009737]
LOGL5	OsLOGL5	LOG family	cytokinin biosynthetic process [GO:0009691]
LOX1.2	T8,LOX2	Lipoxygenase family	oxylipin biosynthetic process [GO:0031408],lipid oxidation [GO:0034440]; oxylipin biosynthetic process [GO:0031408]
LOX1.5	LOX4,SlLOX4,DkLOX4	Lipoxygenase family	lipid oxidation [GO:0034440]; oxylipin biosynthetic process [GO:0031408]
LOX3	LOX3,DkLOX3	Lipoxygenase family	anther dehiscence [GO:0009901]; anther development [GO:0048653]; lipid oxidation [GO:0034440]; oxylipin biosynthetic process [GO:0031408]; pollen development [GO:0009555]; response to fungus [GO:0009620]; response to high light intensity [GO:0009644]; response to jasmonic acid [GO:0009753]; response to wounding [GO:0009611]; stamen filament development [GO:0080086]
LPS	LPS,TPS1,OsTPS1,MoTPS1,AtTPS1,MeTPS1,ScTPS1	Terpene synthase family, Tpsa subfamily	diterpenoid biosynthetic process [GO:0016102],defense response to fungus [GO:0050832]; diterpenoid biosynthetic process [GO:0016102]; ent-kaurene biosynthetic process [GO:0033332]; farnesol biosynthetic process [GO:0006715]; geraniol biosynthetic process [GO:1903448]; response to ethylene [GO:0009723]; response to jasmonic acid [GO:0009753]; sesquiterpenoid biosynthetic process [GO:0016106],Droug…
LRK10	LRK10	Protein kinase superfamily, Ser/Thr protein kinase family
LRK10L-1.2	AtLRK10L1	Protein kinase superfamily, Ser/Thr protein kinase family	cellular response to abscisic acid stimulus [GO:0071215]; cellular response to water deprivation [GO:0042631]; phosphorylation [GO:0016310]; photoperiodism, flowering [GO:0048573]
LRL2	LRL2	LRL2 family (one gene)	microgametogenesis [GO:0055046]; pollen sperm cell differentiation [GO:0048235]; regulation of transcription, DNA-templated [GO:0006355]; root hair cell development [GO:0080147]; root hair cell differentiation [GO:0048765]; root hair elongation [GO:0048767]
LRP1	ZmLRP1	SHI protein family	anther development [GO:0048653]; auxin-activated signaling pathway [GO:0009734]; auxin biosynthetic process [GO:0009851]; pollen development [GO:0009555]; positive regulation of transcription, DNA-templated [GO:0045893]; response to auxin [GO:0009733]; root development [GO:0048364]
LSD3	OsLSD3	TFDB_GO: LSD transcription factor	TFDB_GO: LSD transcription factor
LSMT-L	RBCMT	Class V-like SAM-binding methyltransferase superfamily, Plant protein-lysine LSMT methyltransferase family	peptidyl-lysine monomethylation [GO:0018026]; peptidyl-lysine trimethylation [GO:0018023]
LTI65	RD29B,AtRD29B,MdRD29B,GhRD29B	LTI78/LTI65 family	abscisic acid-activated signaling pathway [GO:0009738]; leaf senescence [GO:0010150]; response to abscisic acid [GO:0009737]; response to cold [GO:0009409]; response to salt stress [GO:0009651]; response to water deprivation [GO:0009414]
LTO1	VKOR,SlVKOR	VKOR family	photosystem II assembly [GO:0010207]
LTP	LTP,TaLTP,NsLTP,SiLTP	Plant LTP family	lipid transport [GO:0006869]
LTP1	StLTP1	Plant LTP family	lipid transport [GO:0006869]
LTP2	SlCDF3,CDF3	CDF3 family (one gene),Plant LTP family	flower development [GO:0009908]; regulation of transcription, DNA-templated [GO:0006355],cuticle development [GO:0042335]; phospholipid transfer to membrane [GO:0006649]; plant epidermal cell differentiation [GO:0090627]; regulation of cutin biosynthetic process [GO:1901957]; response to water deprivation [GO:0009414]
LTP4.1	NtLTP4,TdLTP4	Plant LTP family	lipid transport [GO:0006869]
LUX	LUX	LUX family (one gene)	circadian rhythm [GO:0007623]; positive regulation of circadian rhythm [GO:0042753]
MADS15	OsMADS15	MADS15 family (one gene)	multicellular organism development [GO:0007275]; positive regulation of transcription by RNA polymerase II [GO:0045944]
MADS18	OsMADS18	MADS18 family (one gene)	cell differentiation [GO:0030154]; flower development [GO:0009908]; multicellular organism development [GO:0007275]; positive regulation of transcription by RNA polymerase II [GO:0045944]
MADS2	MADS,BrMADS,JcMADS	MADS2 family (one gene)	cell differentiation [GO:0030154]; positive regulation of transcription by RNA polymerase II [GO:0045944]; specification of stamen identity [GO:0010097]
MADS25	OsMADS25	MADS25 family (one gene)	positive regulation of transcription by RNA polymerase II [GO:0045944]
MADS26	MADS26,OsMADS26	MADS26 family (one gene)	multicellular organism development [GO:0007275]; positive regulation of transcription by RNA polymerase II [GO:0045944]
MADS47	SpMDP1	MADS47 family (one gene)	brassinosteroid mediated signaling pathway [GO:0009742]; positive regulation of transcription by RNA polymerase II [GO:0045944]
MADS50	OsMADS50,SOC1,KdSOC1,GmSOC1	MADS50 family (one gene)	cell differentiation [GO:0030154]; flower development [GO:0009908]; multicellular organism development [GO:0007275]; positive regulation of transcription by RNA polymerase II [GO:0045944]
MADS51	OsMADS51	MADS51 family (one gene)	flower development [GO:0009908]; multicellular organism development [GO:0007275]; positive regulation of short-day photoperiodism, flowering [GO:0048576]; positive regulation of transcription by RNA polymerase II [GO:0045944]
MADS7	M79	MADS7 family (one gene)	cell differentiation [GO:0030154]; multicellular organism development [GO:0007275]; plant ovule development [GO:0048481]; positive regulation of transcription by RNA polymerase II [GO:0045944]
MADS9	PeMADS9,PI,SlPI	MADS9 family (one gene)	positive regulation of transcription by RNA polymerase II [GO:0045944]; specification of petal identity [GO:0010095]; specification of stamen identity [GO:0010097]
MAF5	AtMAF5	MAF5 family (one gene)	flower development [GO:0009908]; multicellular organism development [GO:0007275]; negative regulation of flower development [GO:0009910]; regulation of photoperiodism, flowering [GO:2000028]; regulation of short-day photoperiodism, flowering [GO:0048587]; vernalization response [GO:0010048]
MAP30	RIP	Ribosome-inactivating protein family, Type 1 RIP subfamily	defense response [GO:0006952]; negative regulation of translation [GO:0017148]; regulation of defense response to virus [GO:0050688]
MAPK	MAPK,MnMAPK,FvMAPK,MaMAPK,CsMAPK,MeMAPK,ShMAPK	Stephanie Manual Entry	Stephanie Manual Entry
MAPKKK	MnMAPKKK,MAPKKK,MeMAPKKK,MdMAPKKK,FvMAPKKK,CsMAPKKK,GhMAPKKK,ShMAPKKK,BdMAPKKK	Stephanie Manual Entry	Stephanie Manual Entry
MAPKKK17	MAPKKK17	Protein kinase superfamily, Ser/Thr protein kinase family	abscisic acid-activated signaling pathway [GO:0009738]; activation of protein kinase activity [GO:0032147]; regulation of mitotic cell cycle [GO:0007346]; response to abscisic acid [GO:0009737]; response to osmotic stress [GO:0006970]; signal transduction by protein phosphorylation [GO:0023014]; stress-activated protein kinase signaling cascade [GO:0031098]
MAPKKK20	MKKK20	Protein kinase superfamily, Ser/Thr protein kinase family	abscisic acid-activated signaling pathway [GO:0009738]; activation of protein kinase activity [GO:0032147]; cell division [GO:0051301]; pollen sperm cell differentiation [GO:0048235]; protein autophosphorylation [GO:0046777]; protein phosphorylation [GO:0006468]; regulation of mitotic cell cycle [GO:0007346]; regulation of root meristem growth [GO:0010082]; regulation of stomatal closure [GO:0090…
MARD1	MARD1,SAG102	FLZ family	response to abscisic acid [GO:0009737]; response to glucose [GO:0009749]; response to mannose [GO:1905582]; response to sucrose [GO:0009744]; seed dormancy process [GO:0010162]
MAT	MAT	Plant acyltransferase family	indole alkaloid biosynthetic process [GO:0035835]; response to jasmonic acid [GO:0009753]
matK	matK	Intron maturase 2 family, MatK subfamily	mRNA processing [GO:0006397]; RNA splicing [GO:0008380]; tRNA processing [GO:0008033]
MAX2	MAX2,AtMAX2,OaMAX2,SsMAX2,PpMAX2,ORE9	MAX2 family (one gene)	auxin-activated signaling pathway [GO:0009734]; auxin polar transport [GO:0009926]; cuticle development [GO:0042335]; negative regulation of seed germination [GO:0010187]; positive regulation of response to water deprivation [GO:1902584]; protein ubiquitination [GO:0016567]; regulation of meristem structural organization [GO:0009934]; regulation of shoot system morphogenesis [GO:1900618]; respons…
MBS1	MBS1	MBS1 family (one gene)	cellular response to singlet oxygen [GO:0071452]; cold acclimation [GO:0009631]; regulation of leaf senescence [GO:1900055]; regulation of transcription, DNA-templated [GO:0006355]; response to high light intensity [GO:0009644]; response to photooxidative stress [GO:0080183]
MCM6	MCM6	MCM family	DNA replication initiation [GO:0006270]; DNA unwinding involved in DNA replication [GO:0006268]; double-strand break repair via break-induced replication [GO:0000727]; mitotic DNA replication [GO:1902969]; pre-replicative complex assembly involved in nuclear cell cycle DNA replication [GO:0006267]
MDAR1	MDAR1	FAD-dependent oxidoreductase family
MDN1	MDN1,CaDSR1	Midasin family	abscisic acid-activated signaling pathway [GO:0009738]; embryo sac development [GO:0009553]; regulation of developmental growth [GO:0048638]; ribosomal large subunit assembly [GO:0000027]; ribosomal large subunit export from nucleus [GO:0000055]; rRNA processing [GO:0006364]
MEA	MEA,MEDEA	Class V-like SAM-binding methyltransferase superfamily, Histone-lysine methyltransferase family, EZ subfamily	methylation [GO:0032259]; negative regulation of transcription, DNA-templated [GO:0045892]; regulation of endosperm development [GO:2000014]; regulation of gene expression by genetic imprinting [GO:0006349]; response to absence of light [GO:0009646]; seed morphogenesis [GO:0048317]
MED12	CRP	Mediator complex subunit 12 family	multicellular organism development [GO:0007275]; regulation of development, heterochronic [GO:0040034]; regulation of growth [GO:0040008]; regulation of radial pattern formation [GO:0090213]; regulation of transcription by RNA polymerase II [GO:0006357]
MED14	MED14,SWP	Mediator complex subunit 14 family	cold acclimation [GO:0009631]; multicellular organism development [GO:0007275]; positive regulation of cell population proliferation [GO:0008284]; regulation of growth [GO:0040008]; regulation of transcription by RNA polymerase II [GO:0006357]; systemic acquired resistance [GO:0009627]
MED16	MED16,AtSFR6,OsSFR6,SFR6	Plant Mediator complex subunit 16 family	circadian regulation of gene expression [GO:0032922]; positive regulation of systemic acquired resistance [GO:1901672]; regulation of cell wall pectin metabolic process [GO:1902066]; regulation of ethylene-activated signaling pathway [GO:0010104]; regulation of jasmonic acid mediated signaling pathway [GO:2000022]; regulation of long-day photoperiodism, flowering [GO:0048586]; regulation of plant…
MED18	MED18	Mediator complex subunit 18 family	abscisic acid-activated signaling pathway [GO:0009738]; carpel development [GO:0048440]; defense response [GO:0006952]; ethylene-activated signaling pathway [GO:0009873]; negative regulation of transcription, DNA-templated [GO:0045892]; petal development [GO:0048441]; production of miRNAs involved in gene silencing by miRNA [GO:0035196]; regulation of defense response to fungus [GO:1900150]; regu…
MED25	MED25	Mediator complex subunit 25 family	defense response to fungus [GO:0050832]; flower development [GO:0009908]; jasmonic acid mediated signaling pathway [GO:0009867]; positive regulation of defense response [GO:0031349]; positive regulation of flower development [GO:0009911]; positive regulation of transcription, DNA-templated [GO:0045893]; positive regulation of transcription by RNA polymerase II [GO:0045944]; red, far-red light pho…
MED32	MED2	Mediator complex subunit 32 family	cold acclimation [GO:0009631]; leaf senescence [GO:0010150]; regulation of transcription, DNA-templated [GO:0006355]; response to hydrogen peroxide [GO:0042542]; root development [GO:0048364]
MEE12	CCG	RRN7/TAF1B family	embryo development ending in seed dormancy [GO:0009793]; nucleolar large rRNA transcription by RNA polymerase I [GO:0042790]; RNA polymerase I preinitiation complex assembly [GO:0001188]
MEKK1	AtMEKK1,ZmMEKK1,MEKK1	Protein kinase superfamily, STE Ser/Thr protein kinase family, MAP kinase kinase kinase subfamily	activation of protein kinase activity [GO:0032147]; cold acclimation [GO:0009631]; innate immune response [GO:0045087]; MAPK cascade [GO:0000165]; protein autophosphorylation [GO:0046777]; regulation of mitotic cell cycle [GO:0007346]; response to cold [GO:0009409]; response to L-glutamate [GO:1902065]; response to osmotic stress [GO:0006970]; response to salt stress [GO:0009651]; response to wou…
MET	CsMET	Vitamin-B12 independent methionine synthase family	methionine biosynthetic process [GO:0009086]; methylation [GO:0032259]
MET1	ZKT	MET1 family (one gene)	photosynthesis [GO:0015979]; photosystem II assembly [GO:0010207]; photosystem II repair [GO:0010206]; response to high light intensity [GO:0009644]; response to light stimulus [GO:0009416]; response to wounding [GO:0009611]
MET4	ApDMT2	Class I-like SAM-binding methyltransferase superfamily, C5-methyltransferase family	chromatin organization [GO:0006325]; DNA mediated transformation [GO:0009294]; DNA methylation on cytosine within a CG sequence [GO:0010424]; maintenance of DNA methylation [GO:0010216]
METK4	SAMS3,HvSAMS3	AdoMet synthase family	lignin biosynthetic process [GO:0009809]; methionine metabolic process [GO:0006555]; one-carbon metabolic process [GO:0006730]; response to cold [GO:0009409]; S-adenosylmethionine biosynthetic process [GO:0006556]
MGD2	MGD2	Glycosyltransferase 28 family	cellular response to phosphate starvation [GO:0016036]; fatty acid metabolic process [GO:0006631]; galactolipid metabolic process [GO:0019374]; glycolipid biosynthetic process [GO:0009247]
MGL	AtMGL,MGL	Trans-sulfuration enzymes family	cellular response to sulfate starvation [GO:0009970]; cellular response to water deprivation [GO:0042631]; methionine catabolic process via 2-oxobutanoate [GO:0019458]; protein homotetramerization [GO:0051289]; transsulfuration [GO:0019346]
MH1	MH1	helicase1	DroughtDB Tags: Regulatory Proteins;Gene Expression;Chromatin
MHX	TaMHX	Ca(2+):cation antiporter (CaCA) (TC 2.A.19) family, MHX subfamily	ion transport [GO:0006811]; transmembrane transport [GO:0055085]
MIOX4	MIOX4	Myo-inositol oxygenase family	inositol catabolic process [GO:0019310]; L-ascorbic acid biosynthetic process [GO:0019853]
miR393	miR393,OsmiR393	microRNA393	DroughtDB Tags: Regulatory Proteins;Gene Expression;miRNA
MIZ1	MIZ1,OsMIZ1	MIZ1 family (one gene)	chloroplast organization [GO:0009658]; hydrotropism [GO:0010274]
MKK	MKK,ClMKK,AtMKK	Protein kinase superfamily, STE Ser/Thr protein kinase family, MAP kinase kinase subfamily	DroughtDB Tags: Regulatory Proteins;Signal Transduction;Protein Kinases
MKK1	MKK1,GhMKK1,ZmMKK1,AtMKK1,OsMKK1,VvMKK1	Protein kinase superfamily, STE Ser/Thr protein kinase family, MAP kinase kinase subfamily	DroughtDB Tags: Regulatory Proteins;Signal Transduction;Protein Kinases
MKK2	AtMKK2,VvMKK2	Protein kinase superfamily, STE Ser/Thr protein kinase family, MAP kinase kinase subfamily	activation of protein kinase activity [GO:0032147]; auxin transport [GO:0060918]; cold acclimation [GO:0009631]; defense response, incompatible interaction [GO:0009814]; regulation of mitotic cell cycle [GO:0007346]; response to cold [GO:0009409]; response to salt stress [GO:0009651]; signal transduction by protein phosphorylation [GO:0023014]; stress-activated protein kinase signaling cascade [G…
MKK3	GhMKK3,AtMKK3,VvMKK3	Protein kinase superfamily, STE Ser/Thr protein kinase family, MAP kinase kinase subfamily	abscisic acid-activated signaling pathway [GO:0009738]; activation of MAPK activity [GO:0000187]; activation of protein kinase activity [GO:0032147]; defense response, incompatible interaction [GO:0009814]; induced systemic resistance, ethylene mediated signaling pathway [GO:0009866]; induced systemic resistance, jasmonic acid mediated signaling pathway [GO:0009864]; regulation of mitotic cell cy…
MKK4	GhMKK4,PtMKK4,MKK4,VvMKK4	Protein kinase superfamily, STE Ser/Thr protein kinase family, MAP kinase kinase subfamily	activation of protein kinase activity [GO:0032147]; defense response, incompatible interaction [GO:0009814]; floral organ abscission [GO:0010227]; inflorescence development [GO:0010229]; plant-type hypersensitive response [GO:0009626]; regulation of mitotic cell cycle [GO:0007346]; signal transduction by protein phosphorylation [GO:0023014]; stress-activated protein kinase signaling cascade [GO:0…
MKK5	GhMKK5,MKK5,VvMKK5	Protein kinase superfamily, STE Ser/Thr protein kinase family, MAP kinase kinase subfamily	abscisic acid-activated signaling pathway [GO:0009738]; activation of protein kinase activity [GO:0032147]; cell division [GO:0051301]; defense response, incompatible interaction [GO:0009814]; floral organ abscission [GO:0010227]; inflorescence development [GO:0010229]; plant-type hypersensitive response [GO:0009626]; positive regulation of ethylene biosynthetic process [GO:0010365]; regulation o…
MKK6	OsMKK6	Protein kinase superfamily, STE Ser/Thr protein kinase family, MAP kinase kinase subfamily	activation of protein kinase activity [GO:0032147]; defense response to oomycetes [GO:0002229]; lateral root formation [GO:0010311]; male meiosis cytokinesis [GO:0007112]; regulation of mitotic cell cycle [GO:0007346]; signal transduction by protein phosphorylation [GO:0023014]; stress-activated protein kinase signaling cascade [GO:0031098]
MLO	MLO	MLO family	defense response [GO:0006952]; response to biotic stimulus [GO:0009607]
MLO2	CaMLO2	MLO family	defense response to fungus, incompatible interaction [GO:0009817]; negative regulation of defense response [GO:0031348]; response to fungus [GO:0009620]
MLO7	NTA	MLO family	defense response [GO:0006952]; pollen tube reception [GO:0010483]; response to biotic stimulus [GO:0009607]
MLP423	NtMLP423	MLP family	abscisic acid-activated signaling pathway [GO:0009738]; defense response [GO:0006952]
MLP43	MLP43	MLP family	defense response [GO:0006952]
MMS21	MMS21	NSE2 family	cell cycle [GO:0007049]; cellular response to DNA damage stimulus [GO:0006974]; cytokinin-activated signaling pathway [GO:0009736]; double-strand break repair via homologous recombination [GO:0000724]; germ-line stem-cell niche homeostasis [GO:0060250]; negative regulation of DNA endoreduplication [GO:0032876]; positive regulation of cell population proliferation [GO:0008284]; positive regulation…
MODD	MODD	Ninja family	negative regulation of transcription, DNA-templated [GO:0045892]; signal transduction [GO:0007165]
MORC1	CRT1	MORC ATPase protein family	chromatin organization [GO:0006325]; defense response to virus [GO:0051607]; DNA repair [GO:0006281]; gene silencing by RNA [GO:0031047]; plant-type hypersensitive response [GO:0009626]; positive regulation of defense response to bacterium [GO:1900426]; positive regulation of defense response to virus by host [GO:0002230]; positive regulation of plant-type hypersensitive response [GO:0034052]; po…
MP3	MP3	Cytochrome b5 family, MAPR subfamily
MPC	MPC	MPC family (one gene)	regulation of endosperm development [GO:2000014]; regulation of translation [GO:0006417]; seed morphogenesis [GO:0048317]
MPC1	AtMPC1,MPC1	Mitochondrial pyruvate carrier (MPC) (TC 2.A.105) family	mitochondrial pyruvate transmembrane transport [GO:0006850]; regulation of stomatal movement [GO:0010119]
MPC3	NRGA1	Mitochondrial pyruvate carrier (MPC) (TC 2.A.105) family	mitochondrial pyruvate transmembrane transport [GO:0006850]; negative regulation of anion channel activity [GO:0010360]; negative regulation of potassium ion transmembrane transporter activity [GO:1901017]; regulation of response to water deprivation [GO:2000070]
MPK	MPK,ClMPK,AtMPK	Stephanie Manual Entry	Stephanie Manual Entry
MPK1	SIPK,OsSIPK,SpMPK1,MPK1,ClMPK1,NtMPK1,OsMPK1	Protein kinase superfamily, CMGC Ser/Thr protein kinase family, MAP kinase subfamily	abscisic acid-activated signaling pathway [GO:0009738]; defense response [GO:0006952]; intracellular signal transduction [GO:0035556]; regulation of gene expression [GO:0010468]
MPK12	MAPK1,ZmMAPK1,TaMAPK1,MPK12	Protein kinase superfamily, CMGC Ser/Thr protein kinase family, MAP kinase subfamily	defense response [GO:0006952]; intracellular signal transduction [GO:0035556]; regulation of gene expression [GO:0010468]
MPK14	OsMPK14	Protein kinase superfamily, CMGC Ser/Thr protein kinase family, MAP kinase subfamily	intracellular signal transduction [GO:0035556]; regulation of gene expression [GO:0010468]
MPK16	GhMPK16	Protein kinase superfamily, CMGC Ser/Thr protein kinase family, MAP kinase subfamily	intracellular signal transduction [GO:0035556]; regulation of gene expression [GO:0010468]
MPK3	MPK3,OsMPK3,AtMPK3,SlMPK3,SpMPK3,ZmMPK3,NtMPK3	Protein kinase superfamily, CMGC Ser/Thr protein kinase family, MAP kinase subfamily	intracellular signal transduction [GO:0035556]; regulation of gene expression [GO:0010468]
MPK4	OsMPK4,MPK4	Protein kinase superfamily, CMGC Ser/Thr protein kinase family, MAP kinase subfamily	intracellular signal transduction [GO:0035556]; regulation of gene expression [GO:0010468]
MPK5	ZmMPK5,OsMPK5	Protein kinase superfamily, CMGC Ser/Thr protein kinase family, MAP kinase subfamily	intracellular signal transduction [GO:0035556]; regulation of gene expression [GO:0010468]
MPK7	OsMPK7,GhMPK7,ClMPK7	Protein kinase superfamily, CMGC Ser/Thr protein kinase family, MAP kinase subfamily	defense response [GO:0006952]; intracellular signal transduction [GO:0035556]; regulation of gene expression [GO:0010468]; response to hydrogen peroxide [GO:0042542]
MPK8	NtMPK8	Protein kinase superfamily, CMGC Ser/Thr protein kinase family, MAP kinase subfamily	intracellular signal transduction [GO:0035556]; regulation of gene expression [GO:0010468]
MPS1	MPS1	MPS1 family (one gene),Protein kinase superfamily, Ser/Thr protein kinase family	chiasma assembly [GO:0051026]; chromosome segregation [GO:0007059]; embryo sac development [GO:0009553]; male meiotic nuclear division [GO:0007140]; meiotic DNA double-strand break formation [GO:0042138]; meiotic spindle organization [GO:0000212]; plant-type sporogenesis [GO:0048236]; pollen development [GO:0009555],chromosome segregation [GO:0007059]; meiotic spindle assembly checkpoint [GO:0033…
MRL7	RCB	MRL7 family (one gene)	chloroplast organization [GO:0009658]; regulation of transcription, DNA-templated [GO:0006355]
MRP	MRP	ABC transporter superfamily, ABCC family, Conjugate transporter (TC 3.A.1.208) subfamily	DroughtDB Tags: Ion and Osmotic Homeostasis;Stomatal Movement;Functional Proteins;Channels and Transporters;Transporters;Others
MSBP1	MP1	Cytochrome b5 family, MAPR subfamily	negative regulation of cell growth [GO:0030308]; regulation of lignin biosynthetic process [GO:1901141]
MSBP2	MP2	Cytochrome b5 family, MAPR subfamily
MSD1	SODA	Iron/manganese superoxide dismutase family	defense response to bacterium [GO:0042742]; embryo development ending in seed dormancy [GO:0009793]; response to zinc ion [GO:0010043]
MSH1	MSH1	DNA mismatch repair MutS family	mismatch repair [GO:0006298]; mitochondrial DNA metabolic process [GO:0032042]; mitochondrial genome maintenance [GO:0000002]; response to heat [GO:0009408]
MSI4	ACG1,FVE	WD repeat RBAP46/RBAP48/MSI1 family	cell differentiation [GO:0030154]; chromatin organization [GO:0006325]; DNA repair [GO:0006281]; flower development [GO:0009908]; response to UV-B [GO:0010224]
MSL2	MSL2	MscS (TC 1.A.23) family	chloroplast fission [GO:0010020]; ion transport [GO:0006811]; transmembrane transport [GO:0055085]
MSL3	MSL3	MscS (TC 1.A.23) family	chloroplast fission [GO:0010020]; ion transport [GO:0006811]; transmembrane transport [GO:0055085]
MSP1	MSP1	Protein kinase superfamily, Ser/Thr protein kinase family	anther wall tapetum development [GO:0048658]; hormone-mediated signaling pathway [GO:0009755]; megasporogenesis [GO:0009554]; microsporogenesis [GO:0009556]
MSR2	OsMSR2	Glycosyltransferase GT106 family	cell wall pectin biosynthetic process [GO:0052325]; fucose metabolic process [GO:0006004]; mannan metabolic process [GO:0010412]; mannosylation [GO:0097502]
MSRA3	MSR	MsrA Met sulfoxide reductase family,calmodulin-like gene	cellular response to oxidative stress [GO:0034599]; response to light stimulus [GO:0009416],DroughtDB Tags: Regulatory Proteins;Signal Transduction;Others
MSRB2	CaMSRB2,MSRB2	MsrB Met sulfoxide reductase family	protein repair [GO:0030091]; response to oxidative stress [GO:0006979]
MSSP1	MT1,CtMT1	Major facilitator superfamily, Sugar transporter (TC 2.A.1.1) family	glucose import [GO:0046323]; response to nematode [GO:0009624]
MST2	MST2	Major facilitator superfamily, Sugar transporter (TC 2.A.1.1) family	glucose import [GO:0046323]
MST8	MST8	Major facilitator superfamily, Sugar transporter (TC 2.A.1.1) family	glucose import [GO:0046323]
MT2A	PdMT2A	Metallothionein superfamily, Type 15 family
MT3	CtMT3,MT3	Metallothionein superfamily, Type 15 family	cellular copper ion homeostasis [GO:0006878]
MT3a	MT3a,OsMT3a,GhMT3a	metallothionein, ROS scavenger	DroughtDB Tags: Detoxification;Removal of ROS;Functional Proteins;Detoxification Signaling
MTA	MTA	MT-A70-like family	embryo development ending in seed dormancy [GO:0009793]; mRNA methylation [GO:0080009]; RNA methylation [GO:0001510]
MTD	CaMTD	Zinc-containing alcohol dehydrogenase family
MUTE	MUTE,ZmMUTE,OsMUTE	MUTE family (one gene)	epidermal cell differentiation [GO:0009913]; positive regulation of transcription, DNA-templated [GO:0045893]; stomatal complex development [GO:0010374]
MYB	MYB,TaMYB,PmMYB,JcMYB,GhMYB,SpMYB,GmMYB,BrMYB,StMYB,MeMYB,SlMYB,VfMYB,OsMYB,CsMYB,ZjMYB	transcriptional activator of ABA signaling	DroughtDB Tags: Regulatory Proteins;Gene Expression;Transcription Factors;MYB
MYB1	SiMYB75,QsMYB1,LpMYB1,MYB1,LcMYB1,HvMYB1,IbMYB1,MeMYB1,MdMYB1,FtMYB10	MYB75 family (one gene),MYB1 family (one gene),TFDB_GO: MYB transcription factor,transcriptional activator of ABA signaling	anthocyanin-containing compound biosynthetic process [GO:0009718]; cell differentiation [GO:0030154]; jasmonic acid mediated signaling pathway [GO:0009867]; positive regulation of anthocyanin biosynthetic process [GO:0031542]; regulation of anthocyanin biosynthetic process [GO:0031540]; removal of superoxide radicals [GO:0019430]; response to auxin [GO:0009733]; response to ethylene [GO:0009723];…
MYB101	MYB101	MYB101 family (one gene)	cell differentiation [GO:0030154]; gibberellic acid mediated signaling pathway [GO:0009740]; pollen development [GO:0009555]; pollen sperm cell differentiation [GO:0048235]; positive regulation of abscisic acid-activated signaling pathway [GO:0009789]; positive regulation of programmed cell death [GO:0043068]; positive regulation of transcription, DNA-templated [GO:0045893]; protein storage vacuo…
MYB102	BpMYB102,OsMYB102	MYB102 family (one gene)	cell differentiation [GO:0030154]; defense response [GO:0006952]; regulation of transcription, DNA-templated [GO:0006355]; response to osmotic stress [GO:0006970]; response to wounding [GO:0009611]
MYB108	ZjMYB108	MYB108 family (one gene)	defense response [GO:0006952]; positive regulation of anther dehiscence [GO:0120195]; regulation of transcription, DNA-templated [GO:0006355]; response to fungus [GO:0009620]
MYB109	AtMYB109	TFDB_GO: MYB transcription factor	TFDB_GO: MYB transcription factor
MYB11	QsMYB11	MYB11 family (one gene)	cell differentiation [GO:0030154]; flavonol biosynthetic process [GO:0051555]; multicellular organism development [GO:0007275]; negative regulation of cell population proliferation [GO:0008285]; negative regulation of developmental growth [GO:0048640]; positive regulation of flavonol biosynthetic process [GO:1900386]; response to light stimulus [GO:0009416]; response to UV-B [GO:0010224]
MYB114	MYB114	MYB114 family (one gene)	cell differentiation [GO:0030154]; multicellular organism development [GO:0007275]; regulation of anthocyanin biosynthetic process [GO:0031540]
MYB116	MYB116,IbMYB116	TFDB_GO: MYB transcription factor	TFDB_GO: MYB transcription factor
MYB118	GmMYB118	MYB118 family (one gene)	endosperm development [GO:0009960]; fatty acid homeostasis [GO:0055089]; negative regulation of endosperm development [GO:1904095]; negative regulation of seed maturation [GO:2000692]; positive regulation of fatty acid biosynthetic process [GO:0045723]; positive regulation of transcription, DNA-templated [GO:0045893]; positive regulation of unsaturated fatty acid biosynthetic process [GO:2001280]…
MYB12	QsMYB12,AtMYB12,MYB12	MYB12 family (one gene)	cell differentiation [GO:0030154]; flavonoid biosynthetic process [GO:0009813]; flavonol biosynthetic process [GO:0051555]; positive regulation of flavonol biosynthetic process [GO:1900386]; positive regulation of transcription, DNA-templated [GO:0045893]; response to auxin [GO:0009733]; response to ethylene [GO:0009723]; response to light stimulus [GO:0009416]; response to salt stress [GO:000965…
MYB124	MdMYB124	TFDB_GO: MYB transcription factor	TFDB_GO: MYB transcription factor
MYB13	FtMYB13,MYB13	MYB13 family (one gene)	cell differentiation [GO:0030154]; multicellular organism development [GO:0007275]; regulation of flower development [GO:0009909]
MYB14	FtMYB14,MYB14,GmMYB14	MYB14 family (one gene)	cell differentiation [GO:0030154]; positive regulation of transcription, DNA-templated [GO:0045893]; response to cold [GO:0009409]; response to freezing [GO:0050826]
MYB16	FtMYB16	MYB16 family (one gene)	cell differentiation [GO:0030154]; cell morphogenesis [GO:0000902]; cuticle pattern formation [GO:0035017]; regulation of cutin biosynthetic process [GO:1901957]
MYB2	MYB2,TaMYB2,CmMYB2,AtMYB2,LcMYB2,OsMYB2,MeMYB2,JrMYB2	transcriptional activator of ABA signaling	DroughtDB Tags: Regulatory Proteins;Gene Expression;Transcription Factors;MYB
MYB21	NbMYB21,MdMYB21,MYB21,MYB3,LlMYB3,SiMYB3,MtMYB3,CiMYB3	MYB21 family (one gene),TFDB_GO: MYB transcription factor	gibberellic acid mediated signaling pathway [GO:0009740]; jasmonic acid mediated signaling pathway [GO:0009867]; red, far-red light phototransduction [GO:0009585]; regulation of transcription, DNA-templated [GO:0006355]; response to jasmonic acid [GO:0009753]; stamen development [GO:0048443]; stamen filament development [GO:0080086],TFDB_GO: MYB transcription factor
MYB22	BdMYB22	TFDB_GO: MYB transcription factor	TFDB_GO: MYB transcription factor
MYB24	MYB24	MYB24 family (one gene)	gibberellic acid mediated signaling pathway [GO:0009740]; jasmonic acid mediated signaling pathway [GO:0009867]; regulation of transcription, DNA-templated [GO:0006355]; response to jasmonic acid [GO:0009753]; stamen development [GO:0048443]; stamen filament development [GO:0080086]
MYB29	MYB29	MYB29 family (one gene)	cell differentiation [GO:0030154]; cellular response to sulfur starvation [GO:0010438]; defense response to fungus [GO:0050832]; drought recovery [GO:0009819]; hormone-mediated signaling pathway [GO:0009755]; induced systemic resistance [GO:0009682]; jasmonic acid mediated signaling pathway [GO:0009867]; mitochondria-nucleus signaling pathway [GO:0031930]; negative regulation of ethylene-activate…
MYB30	VvMYB30,TaMYB30	MYB30 family (one gene),TFDB_GO: MYB transcription factor	cell differentiation [GO:0030154]; plant-type hypersensitive response [GO:0009626]; response to auxin [GO:0009733]; response to bacterium [GO:0009617]; response to hypoxia [GO:0001666]; very long-chain fatty acid biosynthetic process [GO:0042761],TFDB_GO: MYB transcription factor
MYB31	TaMYB31	TFDB_GO: MYB transcription factor	TFDB_GO: MYB transcription factor
MYB32	MYB32	MYB32 family (one gene)	cell differentiation [GO:0030154]
MYB33	MYB33,TaMYB33,SlMYB33	MYB33 family (one gene)	anther development [GO:0048653]; anther wall tapetum morphogenesis [GO:0048655]; cell differentiation [GO:0030154]; gibberellic acid mediated signaling pathway [GO:0009740]; negative regulation of cell population proliferation [GO:0008285]; negative regulation of growth [GO:0045926]; pollen sperm cell differentiation [GO:0048235]; positive regulation of abscisic acid-activated signaling pathway […
MYB3R-2	MYB15,AtMYB15,CsMYB15,FtMYB15	MYB3R-2 family (one gene),TFDB_GO: MYB transcription factor	positive regulation of response to salt stress [GO:1901002]; positive regulation of response to water deprivation [GO:1902584]; positive regulation of transcription, DNA-templated [GO:0045893]; response to cold [GO:0009409],TFDB_GO: MYB transcription factor
MYB3R1	TaMYB3R1	MYB3R1 family (one gene)	negative regulation of cell population proliferation [GO:0008285]; negative regulation of cellular response to caffeine [GO:1901181]; negative regulation of transcription, DNA-templated [GO:0045892]; positive regulation of transcription, DNA-templated [GO:0045893]; regulation of cytokinesis [GO:0032465]
MYB3R2	OsMYB3R2,MYB3R2	MYB3R2 family (one gene)	regulation of circadian rhythm [GO:0042752]
MYB41	AtMYB41,MYB41	MYB41 family (one gene)	cell differentiation [GO:0030154]; cuticle development [GO:0042335]; multidimensional cell growth [GO:0009825]; negative regulation of transcription, DNA-templated [GO:0045892]; regulation of primary metabolic process [GO:0080090]; regulation of raffinose metabolic process [GO:0080091]; response to chitin [GO:0010200]
MYB42	SiMYB42	TFDB_GO: MYB transcription factor	TFDB_GO: MYB transcription factor
MYB44	MYB44,BnMYB44,NbMYB44,AtMYB44,JrMYB44,SbMYB44,OsMYBR1	MYB44 family (one gene)	abscisic acid-activated signaling pathway [GO:0009738]; defense response to bacterium [GO:0042742]; defense response to fungus [GO:0050832]; positive regulation of auxin mediated signaling pathway [GO:0010929]; regulation of defense response to fungus [GO:1900150]; regulation of jasmonic acid mediated signaling pathway [GO:2000022]; regulation of salicylic acid mediated signaling pathway [GO:2000…
MYB45	HpMYB45	TFDB_GO: MYB transcription factor	TFDB_GO: MYB transcription factor
MYB46	MdMYB46	MYB46 family (one gene)	cell differentiation [GO:0030154]; defense response to fungus [GO:0050832]; plant-type secondary cell wall biogenesis [GO:0009834]; positive regulation of secondary cell wall biogenesis [GO:1901348]; positive regulation of transcription, DNA-templated [GO:0045893]; regulation of secondary cell wall biogenesis [GO:2000652]
MYB47	MYB47	TFDB_GO: MYB transcription factor	TFDB_GO: MYB transcription factor
MYB48	GmMYB48,HpMYB48,MYB48	MYB48 family (one gene)	regulation of transcription, DNA-templated [GO:0006355]
MYB49	MYB49	TFDB_GO: MYB transcription factor	TFDB_GO: MYB transcription factor
MYB5	GbMYB5,CiMYB5,M2,CaM2	MYB5 family (one gene)	cell differentiation [GO:0030154]; mucilage biosynthetic process involved in seed coat development [GO:0048354]; regulation of gene expression [GO:0010468]; seed coat development [GO:0010214]; trichome morphogenesis [GO:0010090]
MYB51	MYB51	MYB51 family (one gene)	cell differentiation [GO:0030154]; defense response by callose deposition in cell wall [GO:0052544]; defense response to bacterium [GO:0042742]; indole glucosinolate biosynthetic process [GO:0009759]; induced systemic resistance [GO:0009682]; response to bacterium [GO:0009617]; response to insect [GO:0009625]
MYB52	AtMYB52	MYB52 family (one gene)	cell wall organization [GO:0071555]; negative regulation of secondary cell wall biogenesis [GO:1901347]; plant-type secondary cell wall biogenesis [GO:0009834]; positive regulation of secondary cell wall biogenesis [GO:1901348]; regulation of secondary cell wall biogenesis [GO:2000652]; response to abscisic acid [GO:0009737]; response to salt [GO:1902074]; response to water deprivation [GO:000941…
MYB55	OsMYB55,HpMYB55	TFDB_GO: MYB transcription factor	TFDB_GO: MYB transcription factor
MYB56	SiMYB56	MYB56 family (one gene)	brassinosteroid mediated signaling pathway [GO:0009742]; cellular response to brassinosteroid stimulus [GO:0071367]; endothelial cell proliferation [GO:0001935]; integument development [GO:0080060]; negative regulation of cell division [GO:0051782]; negative regulation of long-day photoperiodism, flowering [GO:0048579]; positive regulation of transcription, DNA-templated [GO:0045893]; quiescent c…
MYB6	OsMYB6	MYB6 family (one gene)	cell differentiation [GO:0030154]
MYB60	AtMYB60,VvMYB60,MYB60	transcriptional activator of ABA signaling	DroughtDB Tags: Regulatory Proteins;Gene Expression;Transcription Factors;MYB
MYB61	MYB61,MtMYB61,CsMYB61,AtMYB61	MYB61 family (one gene)	cell differentiation [GO:0030154]; phloem or xylem histogenesis [GO:0010087]; regulation of stomatal movement [GO:0010119]; root development [GO:0048364]; seed coat development [GO:0010214]; xylem development [GO:0010089]
MYB63	HpMYB63	MYB63 family (one gene)	cell differentiation [GO:0030154]; lignin biosynthetic process [GO:0009809]; positive regulation of transcription, DNA-templated [GO:0045893]; regulation of secondary cell wall biogenesis [GO:2000652]; response to UV [GO:0009411]
MYB7	MYB7	MYB7 family (one gene)	cell differentiation [GO:0030154]; regulation of flavonol biosynthetic process [GO:1900384]
MYB70	HpMYB70	TFDB_GO: MYB transcription factor	TFDB_GO: MYB transcription factor
MYB74	TaMYB74	MYB74 family (one gene)	cell differentiation [GO:0030154]; response to abscisic acid [GO:0009737]
MYB76	GmMYB76	MYB76 family (one gene)	cell differentiation [GO:0030154]; regulation of glucosinolate biosynthetic process [GO:0010439]; response to insect [GO:0009625]; response to water deprivation [GO:0009414]; response to wounding [GO:0009611]
MYB77	AtMYB77,MYB77	MYB77 family (one gene)	lateral root development [GO:0048527]; positive regulation of auxin mediated signaling pathway [GO:0010929]; regulation of transcription, DNA-templated [GO:0006355]; response to chitin [GO:0010200]
MYB78	MYB78	MYB78 family (one gene)	regulation of transcription, DNA-templated [GO:0006355]; response to abscisic acid [GO:0009737]; response to salt [GO:1902074]
MYB80	TaMYB80	MYB80 family (one gene)	anther wall tapetum development [GO:0048658]; cell differentiation [GO:0030154]; pollen development [GO:0009555]; trichome morphogenesis [GO:0010090]
MYB81	GmMYB81	TFDB_GO: MYB transcription factor	TFDB_GO: MYB transcription factor
MYB82	TaMYB82	MYB82 family (one gene)	cell differentiation [GO:0030154]; multicellular organism development [GO:0007275]; positive regulation of transcription, DNA-templated [GO:0045893]; trichome differentiation [GO:0010026]
MYB85	GaMYB85	TFDB_GO: MYB transcription factor	TFDB_GO: MYB transcription factor
MYB86	NbMYB86,MYB86,MYB4,PcMYB4,MeMYB4	MYB86 family (one gene),MYB4 family (one gene),transcriptional activator of ABA signaling	cell differentiation [GO:0030154]; regulation of stomatal movement [GO:0010119],cell differentiation [GO:0030154]; positive regulation of transcription, DNA-templated [GO:0045893]; response to cold [GO:0009409],DroughtDB Tags: Regulatory Proteins;Gene Expression;Transcription Factors;MYB
MYB88	MYB88,MdMYB88	MYB88 family (one gene)	embryo sac development [GO:0009553]; guard cell differentiation [GO:0010052]; guard mother cell cytokinesis [GO:0010235]; guard mother cell differentiation [GO:0010444]; lateral root development [GO:0048527]; megasporogenesis [GO:0009554]; multicellular organismal water homeostasis [GO:0050891]; positive regulation of lateral root development [GO:1901333]; positive regulation of response to salt …
MYB9	FtMYB9,MeMYB9	TFDB_GO: MYB transcription factor	TFDB_GO: MYB transcription factor
MYB92	GmMYB92	MYB92 family (one gene)	cell differentiation [GO:0030154]
MYB94	MYB94	MYB94 family (one gene)	cell differentiation [GO:0030154]; positive regulation of transcription, DNA-templated [GO:0045893]; positive regulation of wax biosynthetic process [GO:1904278]; regulation of transcription, DNA-templated [GO:0006355]; response to auxin [GO:0009733]; response to karrikin [GO:0080167]; response to water deprivation [GO:0009414]
MYB96	MYB96	MYB96 family (one gene)	abscisic acid-activated signaling pathway [GO:0009738]; cell differentiation [GO:0030154]; defense response [GO:0006952]; positive regulation of transcription, DNA-templated [GO:0045893]; positive regulation of wax biosynthetic process [GO:1904278]; regulation of abscisic acid-activated signaling pathway [GO:0009787]; regulation of abscisic acid biosynthetic process [GO:0010115]; regulation of ge…
MYC2	MYC2,AtMYC2,JrMYC2,SlMYC2,CmMYC2	MYC2 family (one gene),transcriptional activator of ABA signaling	defense response [GO:0006952]; multicellular organism development [GO:0007275]; positive regulation of transcription, DNA-templated [GO:0045893]; regulation of growth [GO:0040008],abscisic acid-activated signaling pathway [GO:0009738]; extracellular ATP signaling [GO:0106167]; positive regulation of flavonoid biosynthetic process [GO:0009963]; positive regulation of transcription, DNA-templated […
MYC4	MYC4	MYC4 family (one gene)	anthocyanin-containing compound biosynthetic process [GO:0009718]; defense response [GO:0006952]; extracellular ATP signaling [GO:0106167]; positive regulation of transcription, DNA-templated [GO:0045893]; regulation of secondary cell wall biogenesis [GO:2000652]; regulation of transcription, DNA-templated [GO:0006355]; stomatal complex development [GO:0010374]
N1	N1	N1 family (one gene)	defense response [GO:0006952]; nodulation [GO:0009877]
N13	N13	BetVI family	abscisic acid-activated signaling pathway [GO:0009738]; cytokinin-activated signaling pathway [GO:0009736]; defense response [GO:0006952]; nodulation [GO:0009877]; response to biotic stimulus [GO:0009607]
NAC	NAC,GmNAC,SbNAC,ClNAC,PmNAC,OsNAC,GhNAC,TtNAC,TaNAC,SiNAC,PbNAC,FvNAC,AgNAC,CaNAC,BnNAC,PeNAC,MlNAC,MeNAC,CsNAC,PpNAC,JcNAC,ZmNAC,DcNAC,VfNAC,RsNAC	TFDB_GO: NAC transcription factor	TFDB_GO: NAC transcription factor
NAC002	SNAC1,ZmSNAC1,HvSNAC1,OsSNAC1,PeSNAC1,CsATAF1,ATAF1	NAC002 family (one gene)	positive regulation of response to salt stress [GO:1901002]; positive regulation of response to water deprivation [GO:1902584]; regulation of transcription, DNA-templated [GO:0006355],cellular response to hypoxia [GO:0071456]; negative regulation of abscisic acid-activated signaling pathway [GO:0009788]; response to wounding [GO:0009611]
NAC004	GmNAC004	NAC004 family (one gene)
NAC005	GmNAC005	NAC005 family (one gene)	xylem development [GO:0010089]
NAC006	OsNAC006	NAC006 family (one gene)
NAC011	GmNAC011	TFDB_GO: NAC transcription factor	TFDB_GO: NAC transcription factor
NAC012	PeNAC012,ZmNST3	NAC012 family (one gene)	fruit dehiscence [GO:0010047]; plant-type secondary cell wall biogenesis [GO:0009834]; positive regulation of transcription, DNA-templated [GO:0045893]
NAC014	OsNTL2	NAC014 family (one gene)
NAC016	NAC016	TFDB_GO: NAC transcription factor	TFDB_GO: NAC transcription factor
NAC018	NAM	NAC018 family (one gene)	integument development [GO:0080060]; regulation of embryonic development [GO:0045995]; seed morphogenesis [GO:0048317]
NAC019	GmNAC019,AtNAC019,BoNAC019,NAC019,ANAC	NAC019 family (one gene)	response to water deprivation [GO:0009414]
NAC020	GmNAC020	TFDB_GO: NAC transcription factor	TFDB_GO: NAC transcription factor
NAC021	GmNAC021	NAC021 family (one gene)	auxin-activated signaling pathway [GO:0009734]; lateral root development [GO:0048527]; primary shoot apical meristem specification [GO:0010072]
NAC023	RsNAC023	TFDB_GO: NAC transcription factor	TFDB_GO: NAC transcription factor
NAC025	MbNAC25	NAC025 family (one gene)	embryo development ending in seed dormancy [GO:0009793]; plant-type cell wall modification involved in multidimensional cell growth [GO:0009831]; positive regulation of gene expression [GO:0010628]; system development [GO:0048731]
NAC028	PeNAC028	TFDB_GO: NAC transcription factor	TFDB_GO: NAC transcription factor
NAC029	NAC29,TaNAC29,GmNAC29	NAC029 family (one gene)	embryo development ending in seed dormancy [GO:0009793]; flower development [GO:0009908]; fruit ripening [GO:0009835]; leaf senescence [GO:0010150]; multidimensional cell growth [GO:0009825]
NAC030	VND7	Plant vascular related NAC-domain protein family	cellular response to auxin stimulus [GO:0071365]; cell wall organization [GO:0071555]; defense response to fungus [GO:0050832]; multicellular organism development [GO:0007275]; positive regulation of gene expression [GO:0010628]; positive regulation of transcription, DNA-templated [GO:0045893]; protoxylem development [GO:0090059]; regulation of transcription, DNA-templated [GO:0006355]; response …
NAC032	AtNAC32	NAC032 family (one gene)	embryo development ending in seed dormancy [GO:0009793]; positive regulation of leaf senescence [GO:1900057]; positive regulation of transcription, DNA-templated [GO:0045893]
NAC035	ZxNAC035	NAC035 family (one gene)	flower development [GO:0009908]
NAC036	PeNAC036	TFDB_GO: NAC transcription factor	TFDB_GO: NAC transcription factor
NAC043	GmNAC043	NAC043 family (one gene)	fruit dehiscence [GO:0010047]; plant-type secondary cell wall biogenesis [GO:0009834]; positive regulation of transcription, DNA-templated [GO:0045893]
NAC045	PeNAC045	NAC045 family (one gene)	sieve element differentiation [GO:0090603]; sieve element enucleation [GO:0090602]
NAC047	AgNAC47,TaNAC47	NAC047 family (one gene)	embryo development ending in seed dormancy [GO:0009793]; positive regulation of ethylene biosynthetic process [GO:0010365]; response to flooding [GO:0009413]
NAC048	SNAC2,OsSNAC2	NAC048 family (one gene)	positive regulation of response to salt stress [GO:1901002]; positive regulation of response to water deprivation [GO:1902584]; positive regulation of transcription, DNA-templated [GO:0045893]; regulation of defense response to fungus [GO:1900150]; regulation of growth [GO:0040008]; response to cold [GO:0009409]; root development [GO:0048364]
NAC053	NTL4	NAC053 family (one gene)	drought recovery [GO:0009819]; leaf senescence [GO:0010150]; positive regulation of transcription, DNA-templated [GO:0045893]; regulation of reactive oxygen species metabolic process [GO:2000377]
NAC054	CUC1	NAC054 family (one gene)	flower development [GO:0009908]; formation of plant organ boundary [GO:0090691]; lateral root development [GO:0048527]; meristem initiation [GO:0010014]; negative regulation of cell division [GO:0051782]; primary shoot apical meristem specification [GO:0010072]; secondary shoot formation [GO:0010223]
NAC065	GmNAC065	TFDB_GO: NAC transcription factor	TFDB_GO: NAC transcription factor
NAC066	GmNAC066	NAC066 family (one gene)	plant-type secondary cell wall biogenesis [GO:0009834]; positive regulation of transcription, DNA-templated [GO:0045893]
NAC069	LsNAC069	TFDB_GO: NAC transcription factor	TFDB_GO: NAC transcription factor
NAC072	RD26,GmRD26,BdRD26,AtRD26	NAC072 family (one gene)	regulation of transcription, DNA-templated [GO:0006355]
NAC073	GmNAC073	NAC073 family (one gene)	positive regulation of transcription, DNA-templated [GO:0045893]; regulation of secondary cell wall biogenesis [GO:2000652]; regulation of transcription, DNA-templated [GO:0006355]
NAC074	SlNAC8,OsNAC8,GmNAC8	NAC074 family (one gene)	regulation of transcription, DNA-templated [GO:0006355]; response to unfolded protein [GO:0006986]
NAC076	TaNAC7	NAC076 family (one gene)	plant-type secondary cell wall biogenesis [GO:0009834]; regulation of transcription, DNA-templated [GO:0006355]; root cap development [GO:0048829]
NAC080	RsNAC080	TFDB_GO: NAC transcription factor	TFDB_GO: NAC transcription factor
NAC081	PeNAC081,ATAF2	NAC081 family (one gene)	embryo development ending in seed dormancy [GO:0009793]; leaf senescence [GO:0010150]; negative regulation of transcription, DNA-templated [GO:0045892]; positive regulation of transcription, DNA-templated [GO:0045893]; regulation of cell size [GO:0008361]; regulation of photomorphogenesis [GO:0010099]; response to fungus [GO:0009620]; response to jasmonic acid [GO:0009753]; response to light stim…
NAC082	GmNAC082	NAC082 family (one gene)
NAC083	GmNAC083,ZxNAC083,VNI2	NAC083 family (one gene)	leaf senescence [GO:0010150]; negative regulation of transcription, DNA-templated [GO:0045892]; response to abscisic acid [GO:0009737]; response to salt stress [GO:0009651]; viral process [GO:0016032]; xylem development [GO:0010089]
NAC085	GmNAC085	TFDB_GO: NAC transcription factor	TFDB_GO: NAC transcription factor
NAC087	GmNAC087	NAC087 family (one gene)
NAC091	TIP,HvTIP,RpTIP,CpTIP,CsTIP	NAC091 family (one gene)	cellular response to hypoxia [GO:0071456]; defense response to virus [GO:0051607]; positive regulation of defense response to virus by host [GO:0002230]; response to molecule of bacterial origin [GO:0002237]; response to virus [GO:0009615]; viral process [GO:0016032]
NAC098	CUC2	NAC098 family (one gene)	formation of plant organ boundary [GO:0090691]; leaf development [GO:0048366]; primary shoot apical meristem specification [GO:0010072]; regulation of timing of plant organ formation [GO:0090709]; secondary shoot formation [GO:0010223]
NAC1	NAC1,DlNAC1,OsNAC1,HaNAC1,EcNAC1,SlNAC1,JcNAC1,HbNAC1,AaNAC1,MdNAC1,SmNAC1,MlNAC1,PeNAC1,CcNAC1,ShNAC1,DgNAC1,LlNAC1,CmNAC1,AgNAC1	TFDB_GO: NAC transcription factor	TFDB_GO: NAC transcription factor
NAC10	GhNAC10,OsNAC10,MlNAC10	TFDB_GO: NAC transcription factor	TFDB_GO: NAC transcription factor
NAC101	MdVND6	Plant vascular related NAC-domain protein family	cell wall organization [GO:0071555]; metaxylem development [GO:0090058]; multicellular organism development [GO:0007275]; positive regulation of programmed cell death [GO:0043068]; positive regulation of transcription, DNA-templated [GO:0045893]; regulation of cell wall macromolecule metabolic process [GO:0010981]; regulation of transcription, DNA-templated [GO:0006355]; response to abscisic acid…
NAC13	TaNAC13,LpNAC13,GhNAC13	TFDB_GO: NAC transcription factor	TFDB_GO: NAC transcription factor
NAC2	NAC2,AhNAC2,SlNAC2,PwNAC2,GhNAC2,MlNAC2,TaNAC2,LlNAC2,CcNAC2,RhNAC2,BnNAC2,OsNAC2,FaNAC2	TFDB_GO: NAC transcription factor	TFDB_GO: NAC transcription factor
NAC2a	TaNAC2a	NAC TF	DroughtDB Tags: Regulatory Proteins;Gene Expression;Transcription Factors;NAC
NAC3	NAC3,AhNAC3,GhNAC3,RhNAC3,SlNAC3,OsNAC3,CiNAC3	TFDB_GO: NAC transcription factor	TFDB_GO: NAC transcription factor
NAC45	OsNAC45	TFDB_GO: NAC transcription factor	TFDB_GO: NAC transcription factor
NAC59	ORS1	NAC59 family (one gene)	leaf senescence [GO:0010150]; positive regulation of DNA-binding transcription factor activity [GO:0051091]; positive regulation of leaf senescence [GO:1900057]; response to hydrogen peroxide [GO:0042542]; response to wounding [GO:0009611]
NAC6	OsNAC6,TaNAC6,NAC6	TFDB_GO: NAC transcription factor	TFDB_GO: NAC transcription factor
NAC60	AsNAC60,TaNTL5,OsNTL5	NAC60 family (one gene)	cellular response to glucose stimulus [GO:0071333]
NAC69	TaNAC69	NAC69 family (one gene)	positive regulation of transcription, DNA-templated [GO:0045893]
NAD7	NAD7	Complex I 49 kDa subunit family
NADK1	OsNADK1	NAD kinase family	NAD metabolic process [GO:0019674]; NADP biosynthetic process [GO:0006741]
NAGK	ZmNAGK	Acetylglutamate kinase family, ArgB subfamily	arginine biosynthetic process [GO:0006526]; arginine biosynthetic process via ornithine [GO:0042450]
NAGLU	OsCYL1	Glycosyl hydrolase 89 family	embryo development ending in seed dormancy [GO:0009793]; metabolic process [GO:0008152]; positive regulation of cell division [GO:0051781]
NAGS1	NAGS1,SlNAGS1	Acetyltransferase family, ArgA subfamily	arginine biosynthetic process [GO:0006526]
NAGS2	NAGS2	Acetyltransferase family, ArgA subfamily	arginine biosynthetic process [GO:0006526]
NAI2	NAI2	NAI2 family (one gene)	ER body organization [GO:0080119]
NAL1	NAL1,GFP	NAL1 family (one gene)	internode patterning [GO:0080006]; leaf vascular tissue pattern formation [GO:0010305]; regulation of leaf development [GO:2000024]; stem vascular tissue pattern formation [GO:0010222]
NBR1	NBR1	NBR1 family (one gene)	autophagy [GO:0006914]; protein polymerization [GO:0051258]; protein transport [GO:0015031]
NCED	NCED,MtNCED,AtNCED,HvNCED,ZmNCED,SlNCED,MeNCED,OsNCED,CsNCED,VfNCED	Carotenoid oxygenase family	DroughtDB Tags: Ion and Osmotic Homeostasis;Stomatal Movement;Regulatory Proteins;Hormone Signaling;ABA Biosynthesis
NCED3	NCED3,OsNCED3,AhNCED3,BnNCED3,AtNCED3,MdNCED3,GmNCED3,PdNCED3	Carotenoid oxygenase family,Stephanie Manual Entry	abscisic acid biosynthetic process [GO:0009688]; carotene catabolic process [GO:0016121]; hyperosmotic salinity response [GO:0042538]; response to osmotic stress [GO:0006970]; response to water deprivation [GO:0009414],Stephanie Manual Entry
NCED6	AtNCED6,NCED6	Carotenoid oxygenase family	abscisic acid biosynthetic process [GO:0009688]; carotene catabolic process [GO:0016121]; response to red light [GO:0010114]; response to red or far red light [GO:0009639]
NCED9	NCED9	Carotenoid oxygenase family	abscisic acid biosynthetic process [GO:0009688]; carotene catabolic process [GO:0016121]; seed dormancy process [GO:0010162]
NCL	TaNCL	Ca(2+):cation antiporter (CaCA) (TC 2.A.19) family	calcium ion homeostasis [GO:0055074]; calcium ion transmembrane transport [GO:0070588]; cellular calcium ion homeostasis [GO:0006874]; cellular response to salt stress [GO:0071472]
ND1	ND1	Complex I subunit 1 family
ND4	ND4,NAD4	Complex I subunit 4 family	ATP synthesis coupled electron transport [GO:0042773]
NDB2	AtNDB2	NADH dehydrogenase family	oxidation-reduction process [GO:0055114]
NDB3	NDB3	NADH dehydrogenase family	oxidation-reduction process [GO:0055114]
ndhF	ndhF	Complex I subunit 5 family	ATP synthesis coupled electron transport [GO:0042773]
ndhK	ndhK	Complex I 20 kDa subunit family	aerobic respiration [GO:0009060]; electron transport coupled proton transport [GO:0015990]; photosynthesis, light reaction [GO:0019684]
NDL1	NDL1	NDRG family	auxin transport [GO:0060918]; regulation of auxin polar transport [GO:2000012]; regulation of growth [GO:0040008]; response to auxin [GO:0009733]; response to jasmonic acid [GO:0009753]; response to salicylic acid [GO:0009751]
NDPK2	NDPK2,AtNDPK2,PtNDPK2	NDK family	auxin-activated signaling pathway [GO:0009734]; CTP biosynthetic process [GO:0006241]; GTP biosynthetic process [GO:0006183]; purine nucleotide metabolic process [GO:0006163]; pyrimidine nucleotide metabolic process [GO:0006220]; red, far-red light phototransduction [GO:0009585]; response to hydrogen peroxide [GO:0042542]; response to UV [GO:0009411]; UTP biosynthetic process [GO:0006228]
NDR1	NDR1	NDR1 family (one gene)	defense response, incompatible interaction [GO:0009814]; defense response to bacterium [GO:0042742]; defense response to bacterium, incompatible interaction [GO:0009816]; defense response to fungus, incompatible interaction [GO:0009817]; plant-type hypersensitive response [GO:0009626]; positive regulation of cell death [GO:0010942]
NET1A	NET1A	NET family
NFXL1	NFXL1	NFX1 family	defense response to bacterium [GO:0042742]; protein ubiquitination [GO:0016567]; regulation of hydrogen peroxide metabolic process [GO:0010310]; regulation of transcription, DNA-templated [GO:0006355]; response to light intensity [GO:0009642]; response to microbial phytotoxin [GO:0010188]; response to salt stress [GO:0009651]; salicylic acid biosynthetic process [GO:0009697]
NFYA	NFYA,GmNFYA,ZmNFYA,SbNFYA,GhNFYA	NFYA/HAP2 subunit family	DroughtDB Tags: Regulatory Proteins;Gene Expression;Transcription Factors;NF-Y
NFYA1	BnNFYA1,ZmNFYA1,AtNFYA1,SbNFYA1,SiNFYA1	NFYA/HAP2 subunit family	embryo development ending in seed dormancy [GO:0009793]; microgametogenesis [GO:0055046]; regulation of timing of transition from vegetative to reproductive phase [GO:0048510]; regulation of transcription, DNA-templated [GO:0006355]; seed development [GO:0048316]; somatic embryogenesis [GO:0010262]
NFYA10	BnNFYA10,GhNFYA10	NFYA/HAP2 subunit family	regulation of transcription, DNA-templated [GO:0006355]
NFYA2	NFYA2	NFYA/HAP2 subunit family	double fertilization forming a zygote and endosperm [GO:0009567]; regulation of transcription, DNA-templated [GO:0006355]
NFYA3	GmNFYA3,ZmNFYA3,NFYA3,PtNFYA3	NFYA/HAP2 subunit family	regulation of transcription, DNA-templated [GO:0006355]
NFYA4	OsNFYA4,PtNFYA4	NFYA/HAP2 subunit family	negative regulation of transcription, DNA-templated [GO:0045892]; regulation of timing of transition from vegetative to reproductive phase [GO:0048510]; regulation of transcription, DNA-templated [GO:0006355]
NFYA5	CsNFYA5,GmNFYA5,NFYA5,AtNFYA5	NFYA/HAP2 subunit family	abscisic acid-activated signaling pathway [GO:0009738]; blue light signaling pathway [GO:0009785]; embryo development ending in seed dormancy [GO:0009793]; negative regulation of transcription, DNA-templated [GO:0045892]; regulation of transcription, DNA-templated [GO:0006355]; response to water deprivation [GO:0009414]; seed development [GO:0048316]; somatic embryogenesis [GO:0010262]
NFYA7	OsNFYA7,BnNFYA7,NFYA7	NFYA/HAP2 subunit family	negative regulation of transcription, DNA-templated [GO:0045892]; regulation of transcription, DNA-templated [GO:0006355]
NFYA8	BnNFYA8,ZmNFYA8,NFYA8	NFYA/HAP2 subunit family	regulation of transcription, DNA-templated [GO:0006355]
NFYA9	BnNFYA9,PtNFYA9	NFYA/HAP2 subunit family	embryo development ending in seed dormancy [GO:0009793]; microgametogenesis [GO:0055046]; negative regulation of transcription, DNA-templated [GO:0045892]; pollen development [GO:0009555]; regulation of transcription, DNA-templated [GO:0006355]; seed development [GO:0048316]; somatic embryogenesis [GO:0010262]
NFYB1	BnNFYB1	TFDB_GO: NFYB transcription factor	TFDB_GO: NFYB transcription factor
NFYB10	BnNFYB10	NFYB/HAP3 subunit family	glucosinolate metabolic process [GO:0019760]; positive regulation of transcription, DNA-templated [GO:0045893]
NFYB2	BnNFYB2,TaNFYB2,NFYB2,ZmNFYB2,RcNFYB2,ShNFYB2	TFDB_GO: NFYB transcription factor	TFDB_GO: NFYB transcription factor
NFYB3	BnNFYB3,NFYB3,PwNFYB3	TFDB_GO: NFYB transcription factor	TFDB_GO: NFYB transcription factor
NFYB4	TaNFYB4	NFYB/HAP3 subunit family	positive regulation of transcription, DNA-templated [GO:0045893]; regulation of transcription, DNA-templated [GO:0006355]
NFYB7	PdNFYB7,BnNFYB7	NFYB/HAP3 subunit family	positive regulation of transcription, DNA-templated [GO:0045893]
NFYB8	BnNFYB8,SiNFYB8	NFYB/HAP3 subunit family	positive regulation of transcription, DNA-templated [GO:0045893]
NFYB9	LEC1	NFYB/HAP3 subunit family	abscisic acid-activated signaling pathway [GO:0009738]; blue light signaling pathway [GO:0009785]; embryo development ending in seed dormancy [GO:0009793]; positive regulation of fatty acid biosynthetic process [GO:0045723]; positive regulation of transcription, DNA-templated [GO:0045893]; regulation of gene expression, epigenetic [GO:0040029]; somatic embryogenesis [GO:0010262]
NFYC1	PpNFYC1	NFYC/HAP5 subunit family	positive regulation of photomorphogenesis [GO:2000306]; positive regulation of transcription, DNA-templated [GO:0045893]; regulation of transcription, DNA-templated [GO:0006355]
NFYC10	CaNFYC10,NFYC10	NFYC/HAP5 subunit family	regulation of transcription, DNA-templated [GO:0006355]
NFYC2	BnNFYC2,NFYC2	NFYC/HAP5 subunit family	positive regulation of transcription, DNA-templated [GO:0045893]; regulation of transcription, DNA-templated [GO:0006355]
NFYC3	BnNFYC3,ZmNFYC3	NFYC/HAP5 subunit family	abscisic acid-activated signaling pathway [GO:0009738]; gibberellic acid mediated signaling pathway [GO:0009740]; long-day photoperiodism, flowering [GO:0048574]; positive regulation of photomorphogenesis [GO:2000306]; regulation of seed germination [GO:0010029]; regulation of transcription, DNA-templated [GO:0006355]
NFYC4	NFYC4	NFYC/HAP5 subunit family	abscisic acid-activated signaling pathway [GO:0009738]; gibberellic acid mediated signaling pathway [GO:0009740]; negative regulation of starch metabolic process [GO:2000905]; positive regulation of photomorphogenesis [GO:2000306]; positive regulation of protein metabolic process [GO:0051247]; regulation of gene expression [GO:0010468]; regulation of long-day photoperiodism, flowering [GO:0048586…
NFYC6	ZmNFYC6	NFYC/HAP5 subunit family	regulation of transcription, DNA-templated [GO:0006355]
NFYC8	AsNFYC8	NFYC/HAP5 subunit family	regulation of transcription, DNA-templated [GO:0006355]
NGA1	NGA1	NGA1 family (one gene)	flower development [GO:0009908]; leaf development [GO:0048366]; regulation of leaf morphogenesis [GO:1901371]
NHX1	OsNHX1,AtNHX1,NHX1,LfNHX1,TaNHX1,EgNHX1,GmNHX1	Monovalent cation:proton antiporter 1 (CPA1) transporter (TC 2.A.36) family	leaf development [GO:0048366]; potassium ion homeostasis [GO:0055075]; potassium ion transmembrane transport [GO:0071805]; regulation of intracellular pH [GO:0051453]; regulation of stomatal closure [GO:0090333]; response to salt stress [GO:0009651]; sodium ion import across plasma membrane [GO:0098719]
NHX2	OsNHX2,NHX2	Monovalent cation:proton antiporter 1 (CPA1) transporter (TC 2.A.36) family	potassium ion homeostasis [GO:0055075]; potassium ion transmembrane transport [GO:0071805]; regulation of intracellular pH [GO:0051453]; regulation of stomatal closure [GO:0090333]; sodium ion import across plasma membrane [GO:0098719]
NHX3	ZmNHX3	Monovalent cation:proton antiporter 1 (CPA1) transporter (TC 2.A.36) family	potassium ion homeostasis [GO:0055075]; potassium ion transmembrane transport [GO:0071805]; regulation of intracellular pH [GO:0051453]; response to salt stress [GO:0009651]; sodium ion import across plasma membrane [GO:0098719]
NHX5	AtNHX5	Monovalent cation:proton antiporter 1 (CPA1) transporter (TC 2.A.36) family	potassium ion transmembrane transport [GO:0071805]; regulation of intracellular pH [GO:0051453]; sodium ion import across plasma membrane [GO:0098719]
NHX7	PtNHX7,SOS1,OsSOS1,AtSOS1,GhSOS1,MtSOS1,HtSOS1,CcSOS1,GmSOS1	Monovalent cation:proton antiporter 1 (CPA1) transporter (TC 2.A.36) family	potassium ion transmembrane transport [GO:0071805]; regulation of intracellular pH [GO:0051453]; regulation of reactive oxygen species metabolic process [GO:2000377]; response to hydrogen peroxide [GO:0042542]; response to oxidative stress [GO:0006979]; response to reactive oxygen species [GO:0000302]; response to salt stress [GO:0009651]; sodium ion import across plasma membrane [GO:0098719]; so…
NHX8	PtNHX8	Monovalent cation:proton antiporter 1 (CPA1) transporter (TC 2.A.36) family	lithium ion export across the plasma membrane [GO:0010352]; potassium ion transmembrane transport [GO:0071805]; regulation of intracellular pH [GO:0051453]; sodium ion import across plasma membrane [GO:0098719]
NIA2	NIA2,MdNIA2	Nitrate reductase family	nitrate assimilation [GO:0042128]; nitric oxide biosynthetic process [GO:0006809]; response to herbicide [GO:0009635]; response to light stimulus [GO:0009416]; response to symbiotic fungus [GO:0009610]
NIN1	NIN1	Glycosyl hydrolase 100 family	sucrose catabolic process [GO:0005987]
NIR1	NIR	Nitrite and sulfite reductase 4Fe-4S domain family	nitrate assimilation [GO:0042128]; response to nitrate [GO:0010167]
NIT2	NIT2	Carbon-nitrogen hydrolase superfamily, Nitrilase family	detoxification of nitrogen compound [GO:0051410]; indoleacetic acid biosynthetic process [GO:0009684]; response to cadmium ion [GO:0046686]
NLP5	NLP5,GhNLP5	NLP5 family (one gene)	regulation of transcription, DNA-templated [GO:0006355]
NLP7	NLP7	NLP7 family (one gene)	nitrate assimilation [GO:0042128]; response to nitrate [GO:0010167]; response to water deprivation [GO:0009414]; stomatal movement [GO:0010118]
NMNAT	NMNAT	Eukaryotic NMN adenylyltransferase family	NAD biosynthetic process [GO:0009435]
NMT	NMT	Class I-like SAM-binding methyltransferase superfamily, gTMT family	alkaloid metabolic process [GO:0009820]; methylation [GO:0032259]
NMT1	PEAMT,ZmPEAMT	Class I-like SAM-binding methyltransferase superfamily, PEAMT family	choline biosynthetic process [GO:0042425]; methylation [GO:0032259]; phosphatidylcholine biosynthetic process [GO:0006656]; pollen development [GO:0009555]; pollen tube growth [GO:0009860]; pollen tube guidance [GO:0010183]; post-embryonic root development [GO:0048528]; unidimensional cell growth [GO:0009826]
NPC4	NPC4	Bacterial phospholipase C family	phospholipid catabolic process [GO:0009395]
NPF4.6	AIT1	Major facilitator superfamily, Proton-dependent oligopeptide transporter (POT/PTR) (TC 2.A.17) family	abscisic acid transport [GO:0080168]; nitrate assimilation [GO:0042128]; regulation of stomatal movement [GO:0010119]; response to nematode [GO:0009624]
NPK1	NPK1	Protein kinase superfamily, STE Ser/Thr protein kinase family, MAP kinase kinase kinase subfamily	activation of protein kinase activity [GO:0032147]; cell plate assembly [GO:0000919]; defense response [GO:0006952]; regulation of mitotic cell cycle [GO:0007346]; signal transduction by protein phosphorylation [GO:0023014]; stress-activated protein kinase signaling cascade [GO:0031098]
NPR1	NPR1,SlNPR1,AtNPR1,MuNPR1	NPR1 family (one gene)	defense response to bacterium [GO:0042742]; defense response to fungus [GO:0050832]; extracellular ATP signaling [GO:0106167]; induced systemic resistance [GO:0009682]; negative regulation of defense response [GO:0031348]; plant-type hypersensitive response [GO:0009626]; positive regulation of transcription, DNA-templated [GO:0045893]; protein ubiquitination [GO:0016567]; regulation of jasmonic a…
NPR3	NH3	NPR3 family (one gene)	defense response to bacterium [GO:0042742]; defense response to fungus [GO:0050832]; regulation of jasmonic acid mediated signaling pathway [GO:2000022]
NPR5	NH4	NPR5 family (one gene)	induced systemic resistance, jasmonic acid mediated signaling pathway [GO:0009864]
NRAMP1	NRAMP1,AtNRAMP1,OsNRAMP1	NRAMP (TC 2.A.55) family	cadmium ion transmembrane transport [GO:0070574]; iron ion homeostasis [GO:0055072]; iron ion transmembrane transport [GO:0034755]; manganese ion homeostasis [GO:0055071]; manganese ion transmembrane transport [GO:0071421]
NRAMP6	NRAMP6	NRAMP (TC 2.A.55) family	cadmium ion transmembrane transport [GO:0070574]; iron ion homeostasis [GO:0055072]
NRP1	AtNRP1	Nucleosome assembly protein (NAP) family,NRP1 family (one gene)	double-strand break repair via homologous recombination [GO:0000724]; nucleosome assembly [GO:0006334]; response to cadmium ion [GO:0046686]; somatic cell DNA recombination [GO:0016444],abscisic acid-activated signaling pathway [GO:0009738]; defense response [GO:0006952]; positive regulation of defense response to bacterium [GO:1900426]; regulation of abscisic acid biosynthetic process [GO:001011…
NRP2	AtNRP2	Nucleosome assembly protein (NAP) family	double-strand break repair via homologous recombination [GO:0000724]; nucleosome assembly [GO:0006334]; somatic cell DNA recombination [GO:0016444]
NRPD1	RPD1	RNA polymerase beta' chain family	gene silencing by RNA [GO:0031047]; long-distance posttranscriptional gene silencing [GO:0010495]; production of siRNA involved in RNA interference [GO:0030422]; transcription, DNA-templated [GO:0006351]
NSF	NSF	AAA ATPase family	Golgi to plasma membrane protein transport [GO:0043001]; Golgi vesicle docking [GO:0048211]; intra-Golgi vesicle-mediated transport [GO:0006891]; SNARE complex disassembly [GO:0035494]
NSY	B	Lycopene cyclase family	carotene biosynthetic process [GO:0016120]; ubiquinone biosynthetic process [GO:0006744]; xanthophyll biosynthetic process [GO:0016123]
NTH1	NTH1	Nth/MutY family	base-excision repair [GO:0006284]; base-excision repair, AP site formation [GO:0006285]; nucleotide-excision repair, DNA incision, 5'-to lesion [GO:0006296]
NTR1	NTRB	Class-II pyridine nucleotide-disulfide oxidoreductase family	positive regulation of cell division [GO:0051781]; removal of superoxide radicals [GO:0019430]
NTR2	NTRA	Class-II pyridine nucleotide-disulfide oxidoreductase family	removal of superoxide radicals [GO:0019430]
NTRC	NTRC	Class-II pyridine nucleotide-disulfide oxidoreductase family	cell redox homeostasis [GO:0045454]; hydrogen peroxide catabolic process [GO:0042744]; positive regulation of catalytic activity [GO:0043085]; regulation of chlorophyll biosynthetic process [GO:0010380]; regulation of starch biosynthetic process [GO:0010581]; removal of superoxide radicals [GO:0019430]
NUA	TPR	NUA family (one gene)	mRNA export from nucleus [GO:0006406]; negative regulation of flower development [GO:0009910]; negative regulation of protein sumoylation [GO:0033234]; poly(A)+ mRNA export from nucleus [GO:0016973]; protein import into nucleus [GO:0006606]; regulation of gene silencing [GO:0060968]; stamen development [GO:0048443]
NUDT12	HvNUDX12	Nudix hydrolase family
NUDT7	AtNUDX7	Nudix hydrolase family	signal transduction [GO:0007165]
NUP62	AtNUP62	Nucleoporin NSP1/NUP62 family	mRNA transport [GO:0051028]; negative regulation of auxin mediated signaling pathway [GO:0010930]; protein import into nucleus [GO:0006606]; RNA export from nucleus [GO:0006405]
NYC1	NYC1	Short-chain dehydrogenases/reductases (SDR) family	chlorophyll catabolic process [GO:0015996]; PSII associated light-harvesting complex II catabolic process [GO:0010304]
O6	O6	Ribosome-inactivating protein family, Type 1 RIP subfamily	defense response [GO:0006952]; negative regulation of translation [GO:0017148]
OASC	ACS,LlACS,1,Md1,Vp1,Ma1,No1,At1,Ch1	Cysteine synthase/cystathionine beta-synthase family,Class-I pyridoxal-phosphate-dependent aminotransferase family	cysteine biosynthetic process from serine [GO:0006535]; double fertilization forming a zygote and endosperm [GO:0009567]; pollen tube growth [GO:0009860],DroughtDP Tags: Ion and Osmotic Homeostasis;Regulatory Proteins;Hormone Signaling;Ethylene Biosynthesis
OAT	OsOAT,OAT,VvOAT,TaOAT	Class-III pyridoxal-phosphate-dependent aminotransferase family	arginine catabolic process to glutamate [GO:0019544]; arginine catabolic process to proline via ornithine [GO:0010121]; defense response to bacterium, incompatible interaction [GO:0009816]; hyperosmotic salinity response [GO:0042538]; L-proline biosynthetic process [GO:0055129]; mitochondrion localization [GO:0051646]; ornithine catabolic process [GO:0006593]; response to abscisic acid [GO:000973…
OBF1	OBF1,TaOBF1	BZIP family	positive regulation of transcription, DNA-templated [GO:0045893]
OCP3	OCP3	OCP3 family (one gene)	abscisic acid-activated signaling pathway [GO:0009738]; defense response [GO:0006952]; defense response to bacterium [GO:0042742]; defense response to fungus [GO:0050832]; defense response to oomycetes [GO:0002229]; induced systemic resistance [GO:0009682]; jasmonic acid mediated signaling pathway [GO:0009867]; regulation of abscisic acid-activated signaling pathway [GO:0009787]; regulation of de…
OCPI1	OCPI1	chymotrypsin inhibitor-like 1	DroughtDB Function: chymotrypsin inhibitor-like 1
1-Oct	MIP,CsMIP	Peptidase M3 family	peptide metabolic process [GO:0006518]; protein processing involved in protein targeting to mitochondrion [GO:0006627]; proteolysis [GO:0006508]
ODC	ODC,TcODC	Orn/Lys/Arg decarboxylase class-II family	putrescine biosynthetic process from ornithine [GO:0033387]
OEP162	AtOEP162,TaOEP162	Tim17/Tim22/Tim23 family, Plastid outer envelope porin OEP16 (TC 1.B.30) subfamily	ion transmembrane transport [GO:0034220]
OFP17	TaOFP17	OFP17 family (one gene)	negative regulation of transcription, DNA-templated [GO:0045892]
OMR1	OMR1	Serine/threonine dehydratase family	isoleucine biosynthetic process [GO:0009097]; threonine catabolic process [GO:0006567]; threonine metabolic process [GO:0006566]
OPR1	OPR1,SiOPR1	NADH:flavin oxidoreductase/NADH oxidase family	oxylipin biosynthetic process [GO:0031408]
OPR3	OPR3	NADH:flavin oxidoreductase/NADH oxidase family	jasmonic acid biosynthetic process [GO:0009695]; oxylipin biosynthetic process [GO:0031408]; response to fungus [GO:0009620]; response to ozone [GO:0010193]; stamen development [GO:0048443]
OSCPNY1	bAS	Terpene cyclase/mutase family	response to ethylene [GO:0009723]; response to hydrogen peroxide [GO:0042542]; response to jasmonic acid [GO:0009753]; response to metal ion [GO:0010038]; response to molecule of fungal origin [GO:0002238]; response to nitric oxide [GO:0071731]; triterpenoid biosynthetic process [GO:0016104]
OSM	OSM	osmotin-like protein	UniProt Copy: defense response; defense response to bacterium, incompatible interaction; defense response to fungus, incompatible interaction
OSM34	OSM34	Thaumatin family	defense response [GO:0006952]; defense response to bacterium, incompatible interaction [GO:0009816]; defense response to fungus, incompatible interaction [GO:0009817]
OST2	OST2	plasma membrane proton ATPase	DroughtDB Tags: Ion and Osmotic Homeostasis;Stomatal Movement;Regulatory Proteins;Acid Anhydride Hydrolases
OTC	OTC	Aspartate/ornithine carbamoyltransferase superfamily, OTCase family	arginine biosynthetic process via ornithine [GO:0042450]; citrulline biosynthetic process [GO:0019240]
OTU6	OsOTLD1	Peptidase C85 family	histone deubiquitination [GO:0016578]; negative regulation of transcription, DNA-templated [GO:0045892]; positive regulation of growth [GO:0045927]; positive regulation of transcription, DNA-templated [GO:0045893]; regulation of cell growth [GO:0001558]; regulation of chromatin organization [GO:1902275]; regulation of histone acetylation [GO:0035065]; regulation of histone methylation [GO:0031060…
OXI1	OXI1	Protein kinase superfamily, AGC Ser/Thr protein kinase family	cellular response to hypoxia [GO:0071456]; defense response [GO:0006952]; protein phosphorylation [GO:0006468]; response to oxidative stress [GO:0006979]; response to wounding [GO:0009611]
P58IPK	A36	P58IPK family (one gene)	positive regulation by host of viral process [GO:0044794]; viral process [GO:0016032]
P5CR	P5CR,OsP5CR	Stephanie Manual Entry	Stephanie Manual Entry
P5CS1	P5CS,MtP5CS,AtP5CS,OsP5CS,NtP5CS,BdP5CS,SbP5CS,GhP5CS,PtP5CS,VrP5CS,GmP5CS,PuP5CS,PvP5CS,BnP5CS	Glutamate 5-kinase family; Gamma-glutamyl phosphate reductase family	L-proline biosynthetic process [GO:0055129]; proline biosynthetic process [GO:0006561],DroughtDB Tags: Detoxification;Osmolyte Production;Functional Proteins;Enzymes for Osmolyte Biosynthesis
P5CSA	P5CSA,P5CS1,AtP5CS1,OsP5CS1,SbP5CS1,HvP5CS1,ZmP5CS1,PvP5CS1	Glutamate 5-kinase family; Gamma-glutamyl phosphate reductase family	hyperosmotic salinity response [GO:0042538]; L-proline biosynthetic process [GO:0055129]; pollen development [GO:0009555]; proline biosynthetic process [GO:0006561]; response to oxidative stress [GO:0006979]; response to salt stress [GO:0009651]; response to water deprivation [GO:0009414]; root development [GO:0048364],L-proline biosynthetic process [GO:0055129]; proline biosynthetic process [GO:…
P5CSB	P5CS2,AtP5CS2,SbP5CS2,PvP5CS2,SvP5CS2	Glutamate 5-kinase family; Gamma-glutamyl phosphate reductase family	embryo development ending in seed dormancy [GO:0009793]; L-proline biosynthetic process [GO:0055129]; pollen development [GO:0009555]; proline biosynthetic process [GO:0006561]
PAB	PAB	PAB family (one gene)	chloroplast proton-transporting ATP synthase complex assembly [GO:0033614]
PAC	PAC	PAC family (one gene)	cellular response to light stimulus [GO:0071482]; chloroplast mRNA processing [GO:0010239]; chloroplast organization [GO:0009658]; leaf morphogenesis [GO:0009965]; ribosome biogenesis [GO:0042254]; RNA metabolic process [GO:0016070]
PAD4	PAD4	AB hydrolase superfamily, Lipase family	aerenchyma formation [GO:0010618]; cellular response to trehalose stimulus [GO:0071327]; defense response to bacterium, incompatible interaction [GO:0009816]; defense response to Gram-negative bacterium [GO:0050829]; defense response to insect [GO:0002213]; ethylene-activated signaling pathway [GO:0009873]; leaf abscission [GO:0060866]; leaf senescence [GO:0010150]; lipid catabolic process [GO:00…
PAF1	PAF1	Peptidase T1A family	proteasomal protein catabolic process [GO:0010498]; proteasomal ubiquitin-independent protein catabolic process [GO:0010499]; proteasome-mediated ubiquitin-dependent protein catabolic process [GO:0043161]; protein catabolic process [GO:0030163]; response to arsenic-containing substance [GO:0046685]
PAIR2	ASY1	PAIR2 family (one gene)	megasporogenesis [GO:0009554]; microsporogenesis [GO:0009556]; synapsis [GO:0007129]
PAL3	NnPAL3	PAL/histidase family	cinnamic acid biosynthetic process [GO:0009800]; L-phenylalanine catabolic process [GO:0006559]
PAL5	PAL5	PAL/histidase family	cinnamic acid biosynthetic process [GO:0009800]; L-phenylalanine catabolic process [GO:0006559]
PALG1	PAL,NtPAL,SgPAL,CsPAL,PcPAL,BvPAL,MdPAL,FtPAL,BdPAL,TaPAL	PAL/histidase family	cinnamic acid biosynthetic process [GO:0009800]; L-phenylalanine catabolic process [GO:0006559]
PAN	PAN	BZIP family	regulation of flower development [GO:0009909]; transcription, DNA-templated [GO:0006351]
PAO	PAO,OsPAO,CsPAO	PAO family (one gene)	cell death [GO:0008219]; chlorophyll catabolic process [GO:0015996]; defense response to bacterium, incompatible interaction [GO:0009816]; flower development [GO:0009908]; fruit development [GO:0010154]
PAO1	CsPAO1	Flavin monoamine oxidase family	regulation of timing of transition from vegetative to reproductive phase [GO:0048510]; spermine catabolic process [GO:0046208]; thermospermine catabolic process [GO:1903602]
PAO2	AtPAO2,CsPAO2	Flavin monoamine oxidase family	polyamine catabolic process [GO:0006598]; spermidine catabolic process [GO:0046203]; spermine catabolic process [GO:0046208]
PAO3	AtPAO3	Flavin monoamine oxidase family	polyamine catabolic process [GO:0006598]; spermidine catabolic process [GO:0046203]; spermine catabolic process [GO:0046208]
PAO4	AtPAO4,CsPAO4	Flavin monoamine oxidase family	polyamine catabolic process [GO:0006598]; spermidine catabolic process [GO:0046203]; spermine catabolic process [GO:0046208]
PAP	AtPAP,PAP	Metallophosphoesterase superfamily, Purple acid phosphatase family
PAP1	FIB1a,PAP1	PAP/fibrillin family	photoinhibition [GO:0010205]; response to abscisic acid [GO:0009737]; response to cold [GO:0009409]
PAP17	AtACP5	Metallophosphoesterase superfamily, Purple acid phosphatase family	cellular phosphate ion homeostasis [GO:0030643]; response to hydrogen peroxide [GO:0042542]
PAPP5	PAPP5,PP5	PPP phosphatase family, PP-5 (PP-T) subfamily	chloroplast-nucleus signaling pathway [GO:0010019]; negative regulation of chlorophyll biosynthetic process [GO:1902325]; nucleocytoplasmic transport [GO:0006913]; red or far-red light signaling pathway [GO:0010017]; response to cadmium ion [GO:0046686]
PARA	PAR	GST superfamily, HSP26 family	auxin-activated signaling pathway [GO:0009734]; glutathione metabolic process [GO:0006749]
PARG1	PARG1	Poly(ADP-ribose) glycohydrolase family	ATP generation from poly-ADP-D-ribose [GO:1990966]; carbohydrate metabolic process [GO:0005975]; cellular response to DNA damage stimulus [GO:0006974]; defense response to fungus [GO:0050832]; nucleotide-sugar metabolic process [GO:0009225]; regulation of DNA repair [GO:0006282]; regulation of histone modification [GO:0031056]; response to osmotic stress [GO:0006970]; response to oxidative stress…
PARP2	APP,PARP	PARP2 family (one gene)	double-strand break repair [GO:0006302]; double-strand break repair via nonhomologous end joining [GO:0006303]; protein poly-ADP-ribosylation [GO:0070212],double-strand break repair [GO:0006302]; protein poly-ADP-ribosylation [GO:0070212]
PAS2	PEP	Very long-chain fatty acids dehydratase HACD family	fatty acid elongation [GO:0030497]; multicellular organism development [GO:0007275]; sphingolipid biosynthetic process [GO:0030148]; very long-chain fatty acid biosynthetic process [GO:0042761]
PAT	PAT,AtPAT,NtPAT,AAT	Class-I pyridoxal-phosphate-dependent aminotransferase family	aromatic amino acid family biosynthetic process, prephenate pathway [GO:0009095]; embryo development ending in seed dormancy [GO:0009793]; L-phenylalanine biosynthetic process [GO:0009094]
PATL1	ScPATL1	Patellin family	cell cycle [GO:0007049]; cell division [GO:0051301]; pollen tube growth [GO:0009860]
PATL2	ScPATL2	Patellin family	cell cycle [GO:0007049]; cell division [GO:0051301]; cellular response to auxin stimulus [GO:0071365]; protein localization involved in auxin polar transport [GO:1901703]
PBL11	NAK,NtNAK	Protein kinase superfamily, Ser/Thr protein kinase family	defense response [GO:0006952]
PBL2	KIN1,AtKIN1	Protein kinase superfamily, Ser/Thr protein kinase family	defense response [GO:0006952]; positive regulation of defense response to bacterium [GO:1900426]
PBL3	KIN2	KIN2 family (one gene),Protein kinase superfamily, Ser/Thr protein kinase family	response to abscisic acid [GO:0009737]; response to osmotic stress [GO:0006970]; response to water deprivation [GO:0009414],defense response [GO:0006952]
PBS1	PBS1	Protein kinase superfamily, Ser/Thr protein kinase family	defense response [GO:0006952]; defense response to bacterium [GO:0042742]; defense response to bacterium, incompatible interaction [GO:0009816]; innate immune response [GO:0045087]; pattern recognition receptor signaling pathway [GO:0002221]; protein autophosphorylation [GO:0046777]; protein phosphorylation [GO:0006468]
PCF2	OsPCF2	PCF2 family (one gene)	multicellular organism development [GO:0007275]
PCF6	AsPCF6	PCF6 family (one gene)	multicellular organism development [GO:0007275]
PCF8	AsPCF8	PCF8 family (one gene)	multicellular organism development [GO:0007275]
PCK1	PCK1	Phosphoenolpyruvate carboxykinase (ATP) family	gluconeogenesis [GO:0006094]
PCM	PCM	Methyltransferase superfamily, L-isoaspartyl/D-aspartyl protein methyltransferase family
PCO1	NtPCO1	Cysteine dioxygenase family	anaerobic respiration [GO:0009061]; cellular response to hypoxia [GO:0071456]; detection of hypoxia [GO:0070483]; peptidyl-cysteine oxidation [GO:0018171]; response to hypoxia [GO:0001666]
PCO2	NtPCO2	Cysteine dioxygenase family	cellular response to hypoxia [GO:0071456]; detection of hypoxia [GO:0070483]; peptidyl-cysteine oxidation [GO:0018171]; response to hypoxia [GO:0001666]
PDAT1	PDAT,CsPDAT	AB hydrolase superfamily, Lipase family	glycerol metabolic process [GO:0006071]; triglyceride biosynthetic process [GO:0019432]
PDC1	PDC,NtPDC,HbPDC,PDC1,AdPDC1,HbPDC1	TPP enzyme family
PDC3	HbPDC3	TPP enzyme family
PDC4	HbPDC4	TPP enzyme family
PDF1A	CaDEF1	Polypeptide deformylase family	co-translational protein modification [GO:0043686]; translation [GO:0006412]
PDH	PDH,BnPDH	stress responsive helicase	DroughtDB Tags: Regulatory Proteins;Gene Expression;Chromatin
PDH2	NtPDH2	PDH2 family (one gene)	acetyl-CoA biosynthetic process from pyruvate [GO:0006086]; defense response to bacterium [GO:0042742]; glycolytic process [GO:0006096]
PDH45	PDH45	stress responsive helicase	DroughtDB Tags: Regulatory Proteins;Gene Expression;Chromatin
PDIL1-1	PDI5	Protein disulfide isomerase family	cell redox homeostasis [GO:0045454]; embryo development ending in seed dormancy [GO:0009793]; protein folding [GO:0006457]; regulation of programmed cell death [GO:0043067]; response to endoplasmic reticulum stress [GO:0034976]; response to zinc ion [GO:0010043]; seed development [GO:0048316]
PDIL1-5	PDI3	Protein disulfide isomerase family	cell redox homeostasis [GO:0045454]; protein folding [GO:0006457]; response to endoplasmic reticulum stress [GO:0034976]
PDIL2-1	BrPDI11	Protein disulfide isomerase family	cell redox homeostasis [GO:0045454]; double fertilization forming a zygote and endosperm [GO:0009567]; embryo development ending in seed dormancy [GO:0009793]; embryo sac development [GO:0009553]; pollen tube development [GO:0048868]; response to cadmium ion [GO:0046686]; response to endoplasmic reticulum stress [GO:0034976]
PDL2	PDL2	Pterin-4-alpha-carbinolamine dehydratase family	tetrahydrobiopterin biosynthetic process [GO:0006729]
PDX1	PDX1	PdxS/SNZ family	pyridoxal phosphate biosynthetic process [GO:0042823]
PDX11	PDX11	PdxS/SNZ family	cellular amino acid metabolic process [GO:0006520]; pyridoxal phosphate biosynthetic process [GO:0042823]; pyridoxine biosynthetic process [GO:0008615]
PDX12	PDX12,A37	PdxS/SNZ family	cellular amino acid metabolic process [GO:0006520]; pyridoxal phosphate biosynthetic process [GO:0042823]; pyridoxine biosynthetic process [GO:0008615]
PDX13	PDX13	PdxS/SNZ family	cellular amino acid metabolic process [GO:0006520]; chlorophyll metabolic process [GO:0015994]; hyperosmotic salinity response [GO:0042538]; pyridoxal phosphate biosynthetic process [GO:0042823]; pyridoxine biosynthetic process [GO:0008615]; response to lipid hydroperoxide [GO:0006982]; response to non-ionic osmotic stress [GO:0010335]; response to oxidative stress [GO:0006979]; response to salt …
PDX2	PDX2	Glutaminase PdxT/SNO family	glutamine metabolic process [GO:0006541]; pyridoxal phosphate biosynthetic process [GO:0042823]; pyridoxine metabolic process [GO:0008614]; vitamin B6 biosynthetic process [GO:0042819]
PED1	KAT2,OsKAT2	Thiolase-like superfamily, Thiolase family,3-ketoacyl-CoA thiloase-2, K+ channel, inward rectifying	fatty acid beta-oxidation [GO:0006635]; glyoxysome organization [GO:0010111]; jasmonic acid biosynthetic process [GO:0009695]; oxylipin biosynthetic process [GO:0031408]; phenylacetate catabolic process [GO:0010124]; positive regulation of abscisic acid-activated signaling pathway [GO:0009789]; response to wounding [GO:0009611],DroughtDB Tags: Ion and Osmotic Homeostasis;Functional Proteins;Chann…
PEPCK	PEPCK,GmPEPCK	PEP carboxykinase	DroughtDB Tags: Ion and Osmotic Homeostasis;Stomatal Movement
PEPKR2	TaPEPKR2	Protein kinase superfamily, Ser/Thr protein kinase family	intracellular signal transduction [GO:0035556]; peptidyl-serine phosphorylation [GO:0018105]; protein autophosphorylation [GO:0046777]
PER1	OsPOX1	Proline oxidase family,Peroxidase family, Classical plant (class III) peroxidase subfamily	cellular response to hypoxia [GO:0071456]; defense response to bacterium [GO:0042742]; proline catabolic process to glutamate [GO:0010133]; response to oxidative stress [GO:0006979]; response to water deprivation [GO:0009414],hydrogen peroxide catabolic process [GO:0042744]; response to oxidative stress [GO:0006979]
PER2	P2,BiP2	Peroxidase family, Classical plant (class III) peroxidase subfamily	hydrogen peroxide catabolic process [GO:0042744]; lignin metabolic process [GO:0009808]; plant-type cell wall organization [GO:0009664]; response to oxidative stress [GO:0006979]
PER22	P22	Peroxidase family, Classical plant (class III) peroxidase subfamily	hydrogen peroxide catabolic process [GO:0042744]; response to oxidative stress [GO:0006979]; response to zinc ion [GO:0010043]
PER25	P25	Peroxidase family, Classical plant (class III) peroxidase subfamily	hydrogen peroxide catabolic process [GO:0042744]; response to oxidative stress [GO:0006979]
PER3	P3,BiP3,RCI3	Peroxidase family, Classical plant (class III) peroxidase subfamily	hydrogen peroxide catabolic process [GO:0042744]; hyperosmotic salinity response [GO:0042538]; response to cold [GO:0009409]; response to desiccation [GO:0009269]; response to oxidative stress [GO:0006979]
PER4	P4	Peroxidase family, Classical plant (class III) peroxidase subfamily	cellular response to hypoxia [GO:0071456]; hydrogen peroxide catabolic process [GO:0042744]; response to oxidative stress [GO:0006979]
PER43	P43	Peroxidase family, Classical plant (class III) peroxidase subfamily	hydrogen peroxide catabolic process [GO:0042744]; response to oxidative stress [GO:0006979]
PER5	P5	Peroxidase family, Classical plant (class III) peroxidase subfamily	cellular response to hypoxia [GO:0071456]; hydrogen peroxide catabolic process [GO:0042744]; response to oxidative stress [GO:0006979]
PER50	P50	Peroxidase family, Classical plant (class III) peroxidase subfamily	hydrogen peroxide catabolic process [GO:0042744]; response to oxidative stress [GO:0006979]; rhythmic process [GO:0048511]
PER58	P58	Peroxidase family, Classical plant (class III) peroxidase subfamily	hydrogen peroxide catabolic process [GO:0042744]; response to oxidative stress [GO:0006979]
PER6	P6	Peroxidase family, Classical plant (class III) peroxidase subfamily	hydrogen peroxide catabolic process [GO:0042744]; response to oxidative stress [GO:0006979]
PER7	P7	Peroxidase family, Classical plant (class III) peroxidase subfamily	hydrogen peroxide catabolic process [GO:0042744]; response to oxidative stress [GO:0006979]
PER70	PER70	Peroxidase family, Classical plant (class III) peroxidase subfamily	hydrogen peroxide catabolic process [GO:0042744]; response to oxidative stress [GO:0006979]
PER71	PER71	Peroxidase family, Classical plant (class III) peroxidase subfamily	defense response to fungus [GO:0050832]; hydrogen peroxide catabolic process [GO:0042744]; lignin metabolic process [GO:0009808]; respiratory burst [GO:0045730]; response to oxidative stress [GO:0006979]; rhythmic process [GO:0048511]
PER9	P9	Peroxidase family, Classical plant (class III) peroxidase subfamily	anther wall tapetum development [GO:0048658]; hydrogen peroxide catabolic process [GO:0042744]; response to oxidative stress [GO:0006979]
PES	PES	Pescadillo family	maturation of 5.8S rRNA from tricistronic rRNA transcript (SSU-rRNA, 5.8S rRNA, LSU-rRNA) [GO:0000466]; maturation of LSU-rRNA from tricistronic rRNA transcript (SSU-rRNA, 5.8S rRNA, LSU-rRNA) [GO:0000463]; regulation of ribosome biogenesis [GO:0090069]; regulation of rRNA processing [GO:2000232]
petB	petB	Cytochrome b family, PetB subfamily	photosynthesis [GO:0015979]; respiratory electron transport chain [GO:0022904]
PETH	FNR	Ferredoxin--NADP reductase type 1 family	photosynthesis [GO:0015979]
PEX14	AtPEX14,AtPED2	Peroxin-14 family	peroxisome organization [GO:0007031]; protein import into peroxisome matrix, docking [GO:0016560]; protein targeting to peroxisome [GO:0006625]
PEX3	PEX3	PEX3 family (one gene)	cell wall organization [GO:0071555]
PG2	PG	Glycosyl hydrolase 28 family	anther dehiscence [GO:0009901]; cell wall organization [GO:0071555]; fruit dehiscence [GO:0010047]; fruit ripening [GO:0009835]; pectin catabolic process [GO:0045490]
PGIP	PGIP	Polygalacturonase-inhibiting protein family
PGL2	PG1	PGL2 family (one gene)
PGL3	PG2	Glycosyl hydrolase 28 family,PGL3 family (one gene)	anther dehiscence [GO:0009901]; cell wall organization [GO:0071555]; fruit dehiscence [GO:0010047]; fruit ripening [GO:0009835]; pectin catabolic process [GO:0045490]
PGM	PGM	Phosphoglycerate mutase family
PGR	PGR	TMEM19 family
PGR5	PGR5	PGR5 family	cellular response to light intensity [GO:0071484]; photoprotection [GO:0010117]; photosynthetic electron transport in photosystem I [GO:0009773]; response to high light intensity [GO:0009644]; response to water deprivation [GO:0009414]
PHI1	PHI1,EgPHI1	GPI family	gluconeogenesis [GO:0006094]; glucose 6-phosphate metabolic process [GO:0051156]; glycolytic process [GO:0006096]
PHL1	PHL1	MYB-CC family
PHR1	PHR1	DNA photolyase class-2 family	photoreactive repair [GO:0000719]; UV protection [GO:0009650]
PHT1-1	PHT1,MdPHT1	Plant acyltransferase family,Major facilitator superfamily, phosphate:H(+) symporter (TC 2.A.1.9) family	arsenate ion transmembrane transport [GO:1901684]; cellular response to phosphate starvation [GO:0016036]; phosphate ion transport [GO:0006817]
PHT1-2	APT1,MtAPT1	Purine/pyrimidine phosphoribosyltransferase family,Major facilitator superfamily, phosphate:H(+) symporter (TC 2.A.1.9) family	adenine salvage [GO:0006168]; AMP salvage [GO:0044209]; cytokinin metabolic process [GO:0009690]; purine ribonucleoside salvage [GO:0006166],cellular response to phosphate starvation [GO:0016036]; phosphate ion transport [GO:0006817]
PHT1-3	MdPHT3,PHT3,LbPT4,PT4	Major facilitator superfamily, phosphate:H(+) symporter (TC 2.A.1.9) family	phosphate ion transport [GO:0006817]
PHT1-4	MdPHT4,PHT4	Major facilitator superfamily, phosphate:H(+) symporter (TC 2.A.1.9) family	phosphate ion transport [GO:0006817]; response to abscisic acid [GO:0009737]
PHT1-5	MdPHT5	Major facilitator superfamily, phosphate:H(+) symporter (TC 2.A.1.9) family	phosphate ion transport [GO:0006817]
PHT1-6	OsPT6	Major facilitator superfamily, phosphate:H(+) symporter (TC 2.A.1.9) family	phosphate ion transport [GO:0006817]
PHT2	MdPHT2,PHT2	Plant acyltransferase family
PHYB	PHYB	Phytochrome family	detection of visible light [GO:0009584]; protein-chromophore linkage [GO:0018298]; protein-tetrapyrrole linkage [GO:0017006]; red, far-red light phototransduction [GO:0009585]; regulation of transcription, DNA-templated [GO:0006355],abscisic acid metabolic process [GO:0009687]; chromatin organization [GO:0006325]; circadian regulation of calcium ion oscillation [GO:0010617]; detection of visible …
PHYC	PHYC,PgPHYC	Phytochrome family	detection of visible light [GO:0009584]; protein-chromophore linkage [GO:0018298]; protein-tetrapyrrole linkage [GO:0017006]; red, far-red light phototransduction [GO:0009585]; regulation of transcription, DNA-templated [GO:0006355]
PI4KB1	PI4K	PI3/PI4-kinase family, Type III PI4K subfamily	phosphatidylinositol-mediated signaling [GO:0048015]; phosphatidylinositol phosphorylation [GO:0046854]; pollen tube growth [GO:0009860]; root hair cell tip growth [GO:0048768]
PIA2	GmANK6	PIA2 family (one gene)	double fertilization forming a zygote and endosperm [GO:0009567]; embryo sac development [GO:0009553]; male-female gamete recognition during double fertilization forming a zygote and endosperm [GO:0080173]; negative regulation of protein phosphorylation [GO:0001933]; positive regulation of anthocyanin biosynthetic process [GO:0031542]; response to far red light [GO:0010218]; response to high ligh…
PID	ABR,OsPID	Protein kinase superfamily, Ser/Thr protein kinase family	auxin-activated signaling pathway [GO:0009734]; auxin polar transport [GO:0009926]; cotyledon development [GO:0048825]; phyllome development [GO:0048827]; positive gravitropism [GO:0009958]; protein phosphorylation [GO:0006468]; response to auxin [GO:0009733]; response to karrikin [GO:0080167]; root hair elongation [GO:0048767]; root hair initiation [GO:0048766]
PIF3	PIF3,ZmPIF3	PIF3 family (one gene)	de-etiolation [GO:0009704]; gibberellic acid mediated signaling pathway [GO:0009740]; positive regulation of anthocyanin metabolic process [GO:0031539]; red, far-red light phototransduction [GO:0009585]; red or far-red light signaling pathway [GO:0010017]; regulation of transcription, DNA-templated [GO:0006355]; response to red or far red light [GO:0009639]
PIF4	PIF4	BHLH protein family	de-etiolation [GO:0009704]; red, far-red light phototransduction [GO:0009585]; red light signaling pathway [GO:0010161]; red or far-red light signaling pathway [GO:0010017]; regulation of auxin biosynthetic process [GO:0010600]; regulation of auxin mediated signaling pathway [GO:0010928]; response to low fluence blue light stimulus by blue low-fluence system [GO:0010244]
PIF5	PIF5	PIF5 family (one gene)	ethylene biosynthetic process [GO:0009693]; red, far-red light phototransduction [GO:0009585]; regulation of auxin biosynthetic process [GO:0010600]; regulation of auxin mediated signaling pathway [GO:0010928]; response to low fluence blue light stimulus by blue low-fluence system [GO:0010244]
PIL13	OsPIL1	PIL1 family (one gene),BHLH protein family	red or far-red light signaling pathway [GO:0010017]; regulation of transcription, DNA-templated [GO:0006355]; shade avoidance [GO:0009641],internode patterning [GO:0080006]; negative regulation of red or far-red light signaling pathway [GO:0090229]; positive regulation of transcription, DNA-templated [GO:0045893]; regulation of transcription, DNA-templated [GO:0006355]
PIMP1	TaPIMP1	Casparian strip membrane proteins (CASP) family	defense response to bacterium [GO:0042742]; defense response to oomycetes [GO:0002229]; response to abscisic acid [GO:0009737]; response to bacterium [GO:0009617]; response to cold [GO:0009409]; response to ethylene [GO:0009723]; response to jasmonic acid [GO:0009753]; response to salt stress [GO:0009651]; response to wounding [GO:0009611]
PIN1A	PIN1,OsPIN1,PtPIN1	Auxin efflux carrier (TC 2.A.69.1) family	adventitious root development [GO:0048830]; auxin-activated signaling pathway [GO:0009734]; transmembrane transport [GO:0055085]
PIN2	PIN2	Auxin efflux carrier (TC 2.A.69.1) family	auxin-activated signaling pathway [GO:0009734]; auxin efflux [GO:0010315]; auxin homeostasis [GO:0010252]; auxin polar transport [GO:0009926]; positive gravitropism [GO:0009958]; response to auxin [GO:0009733]; response to ethylene [GO:0009723]; response to glucose [GO:0009749]; response to hypoxia [GO:0001666]
PIN3	PtPIN3,SbPIN3,PIN3	Auxin efflux carrier (TC 2.A.69.1) family	auxin-activated signaling pathway [GO:0009734]; auxin efflux [GO:0010315]; auxin homeostasis [GO:0010252]; auxin polar transport [GO:0009926]; gravitropism [GO:0009630]; positive gravitropism [GO:0009958]; response to light stimulus [GO:0009416]; root development [GO:0048364]; root hair elongation [GO:0048767]; root hair initiation [GO:0048766]; tropism [GO:0009606]
PIN4	PIN4	Auxin efflux carrier (TC 2.A.69.1) family	auxin-activated signaling pathway [GO:0009734]; auxin efflux [GO:0010315]; auxin homeostasis [GO:0010252]; auxin polar transport [GO:0009926]; gravitropism [GO:0009630]; root development [GO:0048364]; root morphogenesis [GO:0010015]
PIN7	PIN7	Auxin efflux carrier (TC 2.A.69.1) family	auxin-activated signaling pathway [GO:0009734]; auxin efflux [GO:0010315]; auxin homeostasis [GO:0010252]; auxin polar transport [GO:0009926]; longitudinal axis specification [GO:0009942]
PIN8	PIN5	Auxin efflux carrier (TC 2.A.69.1) family	auxin-activated signaling pathway [GO:0009734]; auxin efflux [GO:0010315]; auxin homeostasis [GO:0010252]; auxin polar transport [GO:0009926]; intracellular auxin transport [GO:0080162]; pollen development [GO:0009555],auxin-activated signaling pathway [GO:0009734]; auxin efflux [GO:0010315]; auxin homeostasis [GO:0010252]; auxin polar transport [GO:0009926]; pollen development [GO:0009555]
PIN9	GmPIN9,SbPIN9	Auxin efflux carrier (TC 2.A.69.1) family	auxin-activated signaling pathway [GO:0009734]; transmembrane transport [GO:0055085]
PIP	PIP,RpPIP,OsPIP,BrPIP,NtPIP,GhPIP,CsPIP	Peptidase S33 family
PIP1	PIP1,OsPIP1,ScPIP1,JcPIP1,GoPIP1,VfPIP1,GhPIP1,BjPIP1,SpPIP1,CpPIP1,VvPIP1,StPIP1	PIP1 family (one gene)	defense response to bacterium [GO:0042742]; immune response [GO:0006955]; innate immune response [GO:0045087]; regulation of root development [GO:2000280]
PIP1-3	RWC3	MIP/aquaporin (TC 1.A.8) family, PIP (TC 1.A.8.11) subfamily	response to water deprivation [GO:0009414]
PIP2	PIP2,OsPIP2,JcPIP2,AtPIP2,AcPIP2,CpPIP2,VvPIP2,GmPIP2	PIP2 family (one gene)	innate immune response [GO:0045087]; regulation of root development [GO:2000280]; response to karrikin [GO:0080167]
PIP2-1	TiPIP2a,AtPIP2A	MIP/aquaporin (TC 1.A.8) family, PIP (TC 1.A.8.11) subfamily	hydrogen peroxide transmembrane transport [GO:0080170]; response to abscisic acid [GO:0009737]; response to water deprivation [GO:0009414]; water transport [GO:0006833]
PIP2-3	RD28,MeRD28	MIP/aquaporin (TC 1.A.8) family, PIP (TC 1.A.8.11) subfamily	response to water deprivation [GO:0009414]
PIP5K1	AtPIP5K1	PIP5K1 family (one gene)
PIP5K11	AtPIP5K11	PIP5K11 family (one gene)
PIP5K3	PIP5K3	PIP5K3 family (one gene)	regulation of establishment of cell polarity [GO:2000114]; root hair cell tip growth [GO:0048768]; root hair elongation [GO:0048767]; root hair initiation [GO:0048766]
PIP5K9	ZmPIP5K9	PIP5K9 family (one gene)	carbohydrate metabolic process [GO:0005975]; cellular amino acid metabolic process [GO:0006520]
PIS2	ZmPIS2	CDP-alcohol phosphatidyltransferase class-I family	phosphatidylinositol biosynthetic process [GO:0006661]
PK	PK	Pyridoxine kinase family	hyperosmotic salinity response [GO:0042538]; pyridoxal 5'-phosphate salvage [GO:0009443]; pyridoxine biosynthetic process [GO:0008615]; trichoblast differentiation [GO:0010054]
PKP1	AtPK1	Pyruvate kinase family	glycolytic process [GO:0006096]; lipid metabolic process [GO:0006629]; response to cadmium ion [GO:0046686]; seed maturation [GO:0010431]
PLA2	PLA2	PLA2 family (one gene)	mRNA cis splicing, via spliceosome [GO:0045292]; multicellular organism development [GO:0007275]; regulation of alternative mRNA splicing, via spliceosome [GO:0000381]
PLA3	GO	Cytochrome P450 family,Peptidase M28 family, M28B subfamily	multicellular organism development [GO:0007275]; regulation of growth [GO:0040008]
PLAT1	PLAT1,AtPLAT1	PLAT1 family (one gene)	regulation of growth [GO:0040008]; response to cold [GO:0009409]; response to salt stress [GO:0009651]; response to water deprivation [GO:0009414]
PLC1	ZmPLC1,TaPLC1,VrPLC1,StPLC1	PLC1 family (one gene)	abscisic acid-activated signaling pathway [GO:0009738]; lipid catabolic process [GO:0016042]; phosphatidylinositol-mediated signaling [GO:0048015]; release of sequestered calcium ion into cytosol [GO:0051209]; response to abscisic acid [GO:0009737]; response to cold [GO:0009409]; response to salt stress [GO:0009651]; response to water deprivation [GO:0009414]
PLC3	PLC3,VrPLC3,StPLC3	PLC3 family (one gene)	lipid catabolic process [GO:0016042]; phosphatidylinositol-mediated signaling [GO:0048015]; release of sequestered calcium ion into cytosol [GO:0051209]
PLC4	PLC4,OsPLC4	PLC4 family (one gene)	lipid catabolic process [GO:0016042]; phosphatidylinositol-mediated signaling [GO:0048015]; release of sequestered calcium ion into cytosol [GO:0051209]
PLC5	PLC5	PLC5 family (one gene)	lipid catabolic process [GO:0016042]; phosphatidylinositol-mediated signaling [GO:0048015]; release of sequestered calcium ion into cytosol [GO:0051209]
PLC8	ZmPLC2,PLC2,BnPLC2,VrPLC2,StPLC2	PLC8 family (one gene)	lipid catabolic process [GO:0016042]; phosphatidylinositol-mediated signaling [GO:0048015]; release of sequestered calcium ion into cytosol [GO:0051209]
PLC9	AtPLC9	PLC9 family (one gene)	calcium ion homeostasis [GO:0055074]; heat acclimation [GO:0010286]; lipid catabolic process [GO:0016042]; phosphatidylinositol-mediated signaling [GO:0048015]; release of sequestered calcium ion into cytosol [GO:0051209]
PLD1	PLD,ZmPLD,AhPLD	Phospholipase D family, C2-PLD subfamily	lipid catabolic process [GO:0016042]; phosphatidylcholine metabolic process [GO:0046470]
PLDALPHA1	AtPLD1,VuPLD1	Phospholipase D family, C2-PLD subfamily,Stephanie Manual Entry	lipid catabolic process [GO:0016042]; phosphatidylcholine metabolic process [GO:0046470],abscisic acid-activated signaling pathway [GO:0009738]; ethylene-activated signaling pathway [GO:0009873]; fatty acid metabolic process [GO:0006631]; leaf shaping [GO:0010358]; lipid catabolic process [GO:0016042]; phosphatidylcholine metabolic process [GO:0046470]; positive regulation of abscisic acid-activa…
PLGG1	PLGG1	CidB/LrgB family	cellular response to water deprivation [GO:0042631]; chloroplast organization [GO:0009658]; glycerate transmembrane transport [GO:1901975]; glycolate transmembrane transport [GO:0097339]; lateral root development [GO:0048527]; photorespiration [GO:0009853]; response to abscisic acid [GO:0009737]; stomatal movement [GO:0010118]
PLS	PLS	POLARIS peptide family	adaxial/abaxial pattern specification [GO:0009955]; auxin-activated signaling pathway [GO:0009734]; auxin homeostasis [GO:0010252]; auxin polar transport [GO:0009926]; cellular response to auxin stimulus [GO:0071365]; cellular response to cytokinin stimulus [GO:0071368]; cellular response to ethylene stimulus [GO:0071369]; cytokinin-activated signaling pathway [GO:0009736]; ethylene-activated sig…
PLSC	PLSC	1-acyl-sn-glycerol-3-phosphate acyltransferase family	CDP-diacylglycerol biosynthetic process [GO:0016024]
PLT1	PmPLT1	AP2/ERF transcription factor family, AP2 subfamily	auxin-activated signaling pathway [GO:0009734]; ethylene-activated signaling pathway [GO:0009873]; pattern specification process [GO:0007389]; root development [GO:0048364]; root meristem growth [GO:0010449]; stem cell population maintenance [GO:0019827]; telomere maintenance [GO:0000723]
PLT2	PmPLT2	AP2/ERF transcription factor family, AP2 subfamily	auxin-activated signaling pathway [GO:0009734]; ethylene-activated signaling pathway [GO:0009873]; meristem maintenance [GO:0010073]; pattern specification process [GO:0007389]; root development [GO:0048364]; root meristem growth [GO:0010449]; stem cell population maintenance [GO:0019827]; telomere maintenance [GO:0000723]
PLT4	DlPLT4	Major facilitator superfamily, Sugar transporter (TC 2.A.1.1) family	glucose import [GO:0046323]
PMADS1	GP	PMADS1 family (one gene)	multicellular organism development [GO:0007275]; positive regulation of transcription by RNA polymerase II [GO:0045944]
PME35	AtPME35	PMEI family; Pectinesterase family	cell wall modification [GO:0042545]; pectin catabolic process [GO:0045490]
PME5	PME5	PMEI family; Pectinesterase family	cell wall modification [GO:0042545]; pectin catabolic process [GO:0045490]; pollen tube growth [GO:0009860]
PMEI	PMEI	PMEI family
PMEI1	CaPMEI1	PMEI family	pollen tube growth [GO:0009860]
PMK	PMK	GHMP kinase family, Mevalonate kinase subfamily	farnesyl diphosphate biosynthetic process, mevalonate pathway [GO:0010142]; isopentenyl diphosphate biosynthetic process, mevalonate pathway [GO:0019287]; sterol biosynthetic process [GO:0016126]
PMS1	OsPMS1	DNA mismatch repair MutL/HexB family	DNA recombination [GO:0006310]; fruit development [GO:0010154]; mismatch repair [GO:0006298]; pollen development [GO:0009555]; seed development [GO:0048316]
PO2	CaPO2	extracellular peroxidase 2	DroughtDB Tags: Detoxification;Removal of ROS;Functional Proteins;Detoxification Signaling
POB1	POB1	POB1 family (one gene)	protein ubiquitination [GO:0016567]; response to red light [GO:0010114]
pod	pod	Peroxidase family, Classical plant (class III) peroxidase subfamily	hydrogen peroxide catabolic process [GO:0042744]; response to oxidative stress [GO:0006979]
POD1	ThPOD1,POD1	TAPT1 family	embryo development ending in seed dormancy [GO:0009793]; maintenance of protein localization in endoplasmic reticulum [GO:0035437]; pollen tube guidance [GO:0010183]
POP2	NaHER1	Class-III pyridoxal-phosphate-dependent aminotransferase family	adaxial/abaxial axis specification [GO:0009943]; beta-alanine catabolic process [GO:0019484]; biotin biosynthetic process [GO:0009102]; fruit development [GO:0010154]; gamma-aminobutyric acid catabolic process [GO:0009450]; gamma-aminobutyric acid metabolic process [GO:0009448]; glutamate decarboxylation to succinate [GO:0006540]; glutamate metabolic process [GO:0006536]; glutamine metabolic proc…
POT1	KT1,LbKT1,HvKUP1,AtKUP1	HAK/KUP transporter (TC 2.A.72.3) family	potassium ion transport [GO:0006813]
POT2	HvKUP2	HAK/KUP transporter (TC 2.A.72.3) family	potassium ion transport [GO:0006813]
POT3	TRH1	HAK/KUP transporter (TC 2.A.72.3) family	cell tip growth [GO:0009932]; potassium ion transport [GO:0006813]
POT5	OsHAK5,HvHAK5,AtHAK5,HAK5,CsHAK5	HAK/KUP transporter (TC 2.A.72.3) family	potassium ion transport [GO:0006813]
POT7	CsHAK7	HAK/KUP transporter (TC 2.A.72.3) family	potassium ion transport [GO:0006813]
POT8	IbHAK8	HAK/KUP transporter (TC 2.A.72.3) family	potassium ion transport [GO:0006813]
POX1	ERD5	Proline oxidase family	cellular response to hypoxia [GO:0071456]; defense response to bacterium [GO:0042742]; proline catabolic process to glutamate [GO:0010133]; response to oxidative stress [GO:0006979]; response to water deprivation [GO:0009414]
POX2	AtPRODH2	Proline oxidase family	proline catabolic process [GO:0006562]; proline catabolic process to glutamate [GO:0010133]; response to osmotic stress [GO:0006970]; response to water deprivation [GO:0009414]
PP2	PP2	PP2 family (one gene)
PP2A	PP2A	PPP phosphatase family, PP-2A subfamily
PP2A1	OsPP2A2	PPP phosphatase family, PP-2A subfamily	abscisic acid-activated signaling pathway [GO:0009738]; cellular protein localization [GO:0034613]; chloroplast avoidance movement [GO:0009903]; negative regulation of abscisic acid-activated signaling pathway [GO:0009788]; positive regulation of fatty acid beta-oxidation [GO:0032000]; protein dephosphorylation [GO:0006470]
PP2A3	OsPP2A4,PP2A3	PPP phosphatase family, PP-2A subfamily	defense response [GO:0006952]; protein dephosphorylation [GO:0006470],primary root development [GO:0080022]; root development [GO:0048364]; stem cell differentiation [GO:0048863]
PP2AA1	RCN1	Phosphatase 2A regulatory subunit A family	abscisic acid-activated signaling pathway [GO:0009738]; auxin-activated signaling pathway [GO:0009734]; auxin polar transport [GO:0009926]; defense response [GO:0006952]; ethylene-activated signaling pathway [GO:0009873]; positive regulation of abscisic acid-activated signaling pathway [GO:0009789]; protein dephosphorylation [GO:0006470]; regulation of protein dephosphorylation [GO:0035304]; regu…
PP2B11	AtPP2B11	PP2B11 family (one gene)	protein ubiquitination [GO:0016567]
PP2C	PP2C,MtPP2C,GhPP2C,ZmPP2C,AmPP2C,GmPP2C,OsPP2C	Stephanie Manual Entry	Stephanie Manual Entry
PP2C27	AtPP2CG1	PP2C family	regulation of transcription from RNA polymerase II promoter in response to salt stress [GO:0061416]; response to abscisic acid [GO:0009737]; response to salt stress [GO:0009651]; response to water deprivation [GO:0009414]
PP2CA	PP2CA,ZmPP2CA,AtPP2CA,AHG3	PP2C family	abscisic acid-activated signaling pathway [GO:0009738]; negative regulation of abscisic acid-activated signaling pathway [GO:0009788]; negative regulation of anion channel activity [GO:0010360]; regulation of stomatal movement [GO:0010119]; response to abscisic acid [GO:0009737]; response to cold [GO:0009409]; response to water deprivation [GO:0009414]
PPC3	PEPC,GhPEPC	PEPCase type 1 family	carbon fixation [GO:0015977]; leaf development [GO:0048366]; photosynthesis [GO:0015979]; tricarboxylic acid cycle [GO:0006099]
PPCK1	PPCK1	Protein kinase superfamily, Ser/Thr protein kinase family	intracellular signal transduction [GO:0035556]; peptidyl-serine phosphorylation [GO:0018105]; protein autophosphorylation [GO:0046777]; response to cycloheximide [GO:0046898]; response to light stimulus [GO:0009416]
PPCK2	PPCK2	Protein kinase superfamily, Ser/Thr protein kinase family	cellular response to phosphate starvation [GO:0016036]; intracellular signal transduction [GO:0035556]; peptidyl-serine phosphorylation [GO:0018105]; protein autophosphorylation [GO:0046777]; protein phosphorylation [GO:0006468]; response to cycloheximide [GO:0046898]; response to light stimulus [GO:0009416]
PPD	PPDK,SmPPDK,PPD	PEP-utilizing enzyme family,AB hydrolase superfamily, Methylesterase family	photosynthesis [GO:0015979]; pyruvate metabolic process [GO:0006090],chlorophyll a catabolic process [GO:0033310]; demethylation [GO:0070988]; jasmonic acid metabolic process [GO:0009694]; leaf senescence [GO:0010150]; salicylic acid metabolic process [GO:0009696]
PPO	PPO	Tyrosinase family	pigment biosynthetic process [GO:0046148]
PPR4	GmPPR4	PPR family, P subfamily	embryonic pattern specification [GO:0009880]; leaf development [GO:0048366]; RNA splicing [GO:0008380]
PR	PR	Aldo/keto reductase family	alkaloid metabolic process [GO:0009820]
PR10	PR10,CaPR10	BetVI family	abscisic acid-activated signaling pathway [GO:0009738]; defense response to fungus [GO:0050832]; regulation of protein serine/threonine phosphatase activity [GO:0080163]
PR4	AtPR4,PR4,OsPR4,NtPR4	PR4 family (one gene)
PRB1	AtPR1,PR1,NtPR1,SlPR1,SgPR1,CaPR1	CRISP family	defense response, incompatible interaction [GO:0009814]; response to bacterium [GO:0009617]; response to ethylene [GO:0009723]; response to herbivore [GO:0080027]; response to jasmonic acid [GO:0009753]; response to salicylic acid [GO:0009751]; response to wounding [GO:0009611]
PRK1	RLK,GbRLK	Protein kinase superfamily, Ser/Thr protein kinase family
PRP	PRP,SbPRP	Plant proline-rich protein superfamily, ENOD12 family	multicellular organism development [GO:0007275]
PRP1	PRP1	Plant proline-rich protein superfamily, ENOD12 family
PRP2	PRP2,SlPRP2	Plant proline-rich protein superfamily, ENOD12 family	multicellular organism development [GO:0007275]
PRP8A	MeSUS2	Glycosyltransferase 1 family, Plant sucrose synthase subfamily,PRP8A family (one gene)	response to hypoxia [GO:0001666]; seed maturation [GO:0010431]; starch metabolic process [GO:0005982]; sucrose metabolic process [GO:0005985],protein tetramerization [GO:0051262]; seed maturation [GO:0010431]; sucrose metabolic process [GO:0005985],alternative mRNA splicing, via spliceosome [GO:0000380]; mRNA splicing, via spliceosome [GO:0000398]; spliceosomal tri-snRNP complex assembly [GO:0000…
PRR37	OsPRR37,PRR37,SbPRR37	ARR-like family	flower development [GO:0009908]; negative regulation of long-day photoperiodism, flowering [GO:0048579]; phosphorelay signal transduction system [GO:0000160]; red, far-red light phototransduction [GO:0009585]; rhythmic process [GO:0048511]
PRR73	HvPRR73	ARR-like family	phosphorelay signal transduction system [GO:0000160]; rhythmic process [GO:0048511]
PRT6	CER3	Sterol desaturase family,UBR1 family	alkane biosynthetic process [GO:0043447]; cuticle development [GO:0042335]; cuticle hydrocarbon biosynthetic process [GO:0006723]; lipid biosynthetic process [GO:0008610]; pollen sperm cell differentiation [GO:0048235]; wax biosynthetic process [GO:0010025],defense response to fungus [GO:0050832]; protein ubiquitination [GO:0016567]; regulation of lipid catabolic process [GO:0050994]; regulation …
psaA	psaA	PsaA/PsaB family	photosynthesis [GO:0015979]; protein-chromophore linkage [GO:0018298]
PSAE	PSAE	PsaE family	photosynthesis [GO:0015979]
PSAN	PSAN	PsaN family	photosynthesis [GO:0015979]
PSAT	PSAT	AB hydrolase superfamily, Lipase family	leaf senescence [GO:0010150]; sterol catabolic process [GO:0016127]; sterol esterification [GO:0034434]
psbA	psbA,ZmpsbA	Reaction center PufL/M/PsbA/D family	photosynthetic electron transport in photosystem II [GO:0009772]; protein-chromophore linkage [GO:0018298]; response to herbicide [GO:0009635]
psbC	psbC	PsbB/PsbC family, PsbC subfamily	photosynthetic electron transport in photosystem II [GO:0009772]; protein-chromophore linkage [GO:0018298]
psbD	psbD	Reaction center PufL/M/PsbA/D family	photosynthetic electron transport in photosystem II [GO:0009772]; protein-chromophore linkage [GO:0018298]
PSD	PSD	Exportin family	flower development [GO:0009908]; meristem initiation [GO:0010014]; tRNA export from nucleus [GO:0006409]; tRNA processing [GO:0008033]; tRNA re-export from nucleus [GO:0071528]
PSD1	PSD1	Phosphatidylserine decarboxylase family, PSD-B subfamily, Eukaryotic type I sub-subfamily	phosphatidylethanolamine biosynthetic process [GO:0006646]; protein autoprocessing [GO:0016540]
PSK1	PSK	Phytosulfokine family	cell differentiation [GO:0030154]; multicellular organism development [GO:0007275]
PSKR1	PSKR,OsPSKR	Protein kinase superfamily, Ser/Thr protein kinase family	innate immune response [GO:0045087]; regulation of defense response [GO:0031347]
PSP	PSP	HAD-like hydrolase superfamily, SerB family	dephosphorylation [GO:0016311]; embryo development ending in seed dormancy [GO:0009793]; L-serine biosynthetic process [GO:0006564]; L-serine metabolic process [GO:0006563]; pollen development [GO:0009555]; root development [GO:0048364]; sulfur amino acid metabolic process [GO:0000096]
PSY1	PSY,CpPSY,TaPSY,OsPSY,PSY1,MePSY1,TaPSY1,OsPSY1	Phytoene/squalene synthase family	carotenoid biosynthetic process [GO:0016117]
PT1	LbPT1	Major facilitator superfamily, phosphate:H(+) symporter (TC 2.A.1.9) family	floral organ senescence [GO:0080187]; phosphate ion transport [GO:0006817]; response to ethylene [GO:0009723]
PT2	LbPT2	Major facilitator superfamily, phosphate:H(+) symporter (TC 2.A.1.9) family	response to symbiotic fungus [GO:0009610]
PT3	LbPT3	Major facilitator superfamily, phosphate:H(+) symporter (TC 2.A.1.9) family	phosphate ion transport [GO:0006817]; response to symbiotic fungus [GO:0009610]
PT5	LbPT5	Major facilitator superfamily, phosphate:H(+) symporter (TC 2.A.1.9) family	response to symbiotic fungus [GO:0009610]
PTB	PTB	PTB family (one gene)	mRNA processing [GO:0006397]; regulation of alternative mRNA splicing, via spliceosome [GO:0000381]; regulation of RNA splicing [GO:0043484]; regulation of translation [GO:0006417]; RNA splicing [GO:0008380]; seed germination [GO:0009845]
PTF2	PTF2	PTF2 family (one gene)	DNA-templated transcription, initiation [GO:0006352]; embryo development ending in seed dormancy [GO:0009793]; pollen germination [GO:0009846]; regulation of transcription, DNA-templated [GO:0006355]; RNA polymerase III preinitiation complex assembly [GO:0070898]
PTI1	CaPTI1	Protein kinase superfamily, Ser/Thr protein kinase family	plant-type hypersensitive response [GO:0009626]; protein phosphorylation [GO:0006468]
PTM	PTM,RhPTM	PTM family (one gene)	chloroplast-nucleus signaling pathway [GO:0010019]; positive regulation of transcription, DNA-templated [GO:0045893]
PTS1	PTS1	Plant dirigent protein family
PU1	LDA	Glycosyl hydrolase 13 family	starch biosynthetic process [GO:0019252]; starch catabolic process [GO:0005983]
PUB1	UFD2,CaPUB1,TaPUB1	Ubiquitin conjugation factor E4 family	protein polyubiquitination [GO:0000209]; protein ubiquitination [GO:0016567]; ubiquitin-dependent ERAD pathway [GO:0030433]; ubiquitin-dependent protein catabolic process [GO:0006511]
PUB10	MtPUB10	PUB10 family (one gene)	protein autoubiquitination [GO:0051865]; protein destabilization [GO:0031648]; protein ubiquitination [GO:0016567]; regulation of jasmonic acid mediated signaling pathway [GO:2000022]
PUB15	PUB15,OsPUB15	PUB15 family (one gene)
PUB17	MtPUB17	PUB17 family (one gene)	defense response, incompatible interaction [GO:0009814]; protein ubiquitination [GO:0016567]
PUB18	MtPUB18,AtPUB18,PUB18	PUB18 family (one gene)	abscisic acid-activated signaling pathway [GO:0009738]; protein ubiquitination [GO:0016567]; regulation of abscisic acid-activated signaling pathway [GO:0009787]; regulation of seed germination [GO:0010029]; regulation of stomatal movement [GO:0010119]
PUB19	AtPUB19,PUB19	PUB19 family (one gene)	regulation of seed germination [GO:0010029]
PUB2	OsPUB2	PUB2 family (one gene)
PUB22	AtPUB22,PUB22	PUB22 family (one gene)	defense response [GO:0006952]; protein autoubiquitination [GO:0051865]; protein ubiquitination [GO:0016567]; respiratory burst involved in defense response [GO:0002679]; response to chitin [GO:0010200]; response to water deprivation [GO:0009414]
PUB23	AtPUB23,PUB23	PUB23 family (one gene)	defense response [GO:0006952]; protein autoubiquitination [GO:0051865]; protein ubiquitination [GO:0016567]; respiratory burst involved in defense response [GO:0002679]; response to chitin [GO:0010200]; response to water deprivation [GO:0009414]
PUB26	TaPUB26	PUB26 family (one gene)	defense response, incompatible interaction [GO:0009814]; protein ubiquitination [GO:0016567]
PUB27	PUB27,StPUB27	PUB27 family (one gene)	response to chitin [GO:0010200]
PUB30	AtPUB30	PUB30 family (one gene)	cellular response to salt stress [GO:0071472]; negative regulation of response to salt stress [GO:1901001]
PUB33	OsPUB33	Protein kinase superfamily, Ser/Thr protein kinase family
PUB35	MtPUB35	Protein kinase superfamily, Ser/Thr protein kinase family
PUB39	OsPUB39	PUB39 family (one gene)
PUB41	OsPUB41	PUB41 family (one gene)
PUB42	MtPUB42	PUB42 family (one gene)
PUB44	MtPUB44,SAUL1	PUB44 family (one gene)	leaf senescence [GO:0010150]; negative regulation of abscisic acid biosynthetic process [GO:0090359]; regulation of abscisic acid biosynthetic process [GO:0010115]; regulation of chlorophyll biosynthetic process [GO:0010380]; regulation of chlorophyll catabolic process [GO:0010271]
PUB46	AtPUB46	PUB46 family (one gene)	cellular response to water deprivation [GO:0042631]
PUB47	AtPUB47	PUB47 family (one gene)
PUB48	AtPUB48	PUB48 family (one gene)	regulation of cellular response to heat [GO:1900034]
PUB6	PUB6,GmPUB6	PUB6 family (one gene)
PUB70	OsPUB70	Protein kinase superfamily, Ser/Thr protein kinase family
PUB8	GmPUB8	PUB8 family (one gene)	protein ubiquitination [GO:0016567]
PUMP1	UCP1	Mitochondrial carrier (TC 2.A.29) family	amino acid transmembrane transport [GO:0003333]; mitochondrial transmembrane transport [GO:1990542]; photorespiration [GO:0009853]
PUP	PUP,OsPUP	Purine permeases family	DroughtDB Tags: Functional Proteins;Channels and Transporters;Transporters;Others
PUP7	OsPUP7	Purine permeases (TC 2.A.7.14) family,Purine permeases family	purine nucleobase transport [GO:0006863],DroughtDB Tags: Functional Proteins;Channels and Transporters;Transporters;Others
PUX2	OsPUB3	PUX2 family (one gene)	defense response to fungus [GO:0050832]; response to fungus [GO:0009620]
PXG1	FsCLO1	Caleosin family	defense response [GO:0006952]; embryo development ending in seed dormancy [GO:0009793]; lipid droplet organization [GO:0034389]; negative regulation of lipid storage [GO:0010888]; oxylipin biosynthetic process [GO:0031408]; seed maturation [GO:0010431]
PXG3	AtCLO3,RD20,AtRD20,ZmRD20,GmRD20	Caleosin family	(R)-2-hydroxy-alpha-linolenic acid biosynthetic process [GO:1902609]; defense response to fungus [GO:0050832]; oxylipin metabolic process [GO:0031407]; regulation of reactive oxygen species metabolic process [GO:2000377]; response to abscisic acid [GO:0009737]; response to cold [GO:0009409]; response to desiccation [GO:0009269]; response to fungus [GO:0009620]; response to salicylic acid [GO:0009…
PXL1	AtPXL1	Protein kinase superfamily, Ser/Thr protein kinase family	cell differentiation [GO:0030154]; hormone-mediated signaling pathway [GO:0009755]; phloem or xylem histogenesis [GO:0010087]; procambium histogenesis [GO:0010067]
PYD1	AtPYD1	Dihydropyrimidine dehydrogenase family	beta-alanine biosynthetic process [GO:0019483]; cellular response to nitrogen levels [GO:0043562]; thymine catabolic process [GO:0006210]; uracil catabolic process [GO:0006212]
PYL	ZmPYL,PYL,GhPYL,NtPYL,SlPYL,OsPYL,BnPYL	Stephanie Manual Entry	Stephanie Manual Entry
PYL1	RCAR12	PYR/PYL/RCAR abscisic acid intracellular receptor family	abscisic acid-activated signaling pathway [GO:0009738]; defense response [GO:0006952]; regulation of protein serine/threonine phosphatase activity [GO:0080163]
PYL10	VvPYL1,PePYL1,SvPYL1,CsPYL1,MpPYL1,ZmPYL1	PYR/PYL/RCAR abscisic acid intracellular receptor family	abscisic acid-activated signaling pathway [GO:0009738]; defense response [GO:0006952]; regulation of protein serine/threonine phosphatase activity [GO:0080163],abscisic acid-activated signaling pathway [GO:0009738]; negative regulation of protein serine/threonine phosphatase activity [GO:1905183]; regulation of protein serine/threonine phosphatase activity [GO:0080163]
PYL12	NtPYL12,ZmPYL12,BnPYL12,VvRCAR6	PYR/PYL/RCAR abscisic acid intracellular receptor family	abscisic acid-activated signaling pathway [GO:0009738]; regulation of protein serine/threonine phosphatase activity [GO:0080163]
PYL13	PYL13,ZmPYL13,GuPYL13,BnPYL13,RCAR7	PYR/PYL/RCAR abscisic acid intracellular receptor family	abscisic acid-activated signaling pathway [GO:0009738]; regulation of protein serine/threonine phosphatase activity [GO:0080163]
PYL3	RCAR13,PYL10,GmPYL10,ZmPYL10,OsPYL10,GuPYL10,PYL3,OsPYL3,ZmPYL3	PYR/PYL/RCAR abscisic acid intracellular receptor family	abscisic acid-activated signaling pathway [GO:0009738]; regulation of protein serine/threonine phosphatase activity [GO:0080163],abscisic acid-activated signaling pathway [GO:0009738]; negative regulation of protein serine/threonine phosphatase activity [GO:1905183]; regulation of protein serine/threonine phosphatase activity [GO:0080163]; response to cold [GO:0009409]; response to water deprivat…
PYL4	PYL4,AtPYL4,ZmPYL4,GuPYL4	PYR/PYL/RCAR abscisic acid intracellular receptor family	abscisic acid-activated signaling pathway [GO:0009738]; regulation of protein serine/threonine phosphatase activity [GO:0080163]
PYL5	ZmPYL11,PYL5,AtPYL5,CsPYL5,ZmPYL5,GuPYL5	PYR/PYL/RCAR abscisic acid intracellular receptor family	abscisic acid-activated signaling pathway [GO:0009738]; negative regulation of protein serine/threonine phosphatase activity [GO:1905183]; regulation of protein serine/threonine phosphatase activity [GO:0080163]; response to osmotic stress [GO:0006970]; response to salt stress [GO:0009651]; response to water deprivation [GO:0009414]; seed germination [GO:0009845]; seedling development [GO:0090351…
PYL6	PYL6,OsPYL6,ZmPYL6	PYR/PYL/RCAR abscisic acid intracellular receptor family	abscisic acid-activated signaling pathway [GO:0009738]; jasmonic acid mediated signaling pathway [GO:0009867]; regulation of protein serine/threonine phosphatase activity [GO:0080163]
PYL7	PYL7,ZmPYL7	PYR/PYL/RCAR abscisic acid intracellular receptor family	abscisic acid-activated signaling pathway [GO:0009738]; regulation of protein serine/threonine phosphatase activity [GO:0080163]
PYL8	PYL8,CsPYL8,ZmPYL8,GuPYL8	PYR/PYL/RCAR abscisic acid intracellular receptor family	abscisic acid-activated signaling pathway [GO:0009738]; positive regulation of abscisic acid-activated signaling pathway [GO:0009789]; regulation of protein serine/threonine phosphatase activity [GO:0080163]; response to abscisic acid [GO:0009737]
PYL9	RCAR1,PYL9,AaPYL9,SlPYL9,ZmPYL9,OsPYL9,GuPYL9,PYL2,OsPYL2	PYR/PYL/RCAR abscisic acid intracellular receptor family	abscisic acid-activated signaling pathway [GO:0009738]; regulation of protein serine/threonine phosphatase activity [GO:0080163],abscisic acid-activated signaling pathway [GO:0009738]; negative regulation of protein serine/threonine phosphatase activity [GO:1905183]; regulation of protein serine/threonine phosphatase activity [GO:0080163]; response to cold [GO:0009409]; response to water deprivat…
PYR1	PYR1,ZjPYR1,BnPYR1,RCAR11	PYR/PYL/RCAR abscisic acid intracellular receptor family	abscisic acid-activated signaling pathway [GO:0009738]; positive regulation of response to water deprivation [GO:1902584]; regulation of protein serine/threonine phosphatase activity [GO:0080163]
QCT	QC	Plant glutaminyl-peptide cyclotransferase family	peptidyl-pyroglutamic acid biosynthetic process, using glutaminyl-peptide cyclotransferase [GO:0017186]
QQS	QQS	QQS family (one gene)	negative regulation of starch metabolic process [GO:2000905]; positive regulation of protein metabolic process [GO:0051247]; starch biosynthetic process [GO:0019252]
QS	QS	Quinolinate synthase A family, Type 1 subfamily	'de novo' NAD biosynthetic process from aspartate [GO:0034628]; aerobic respiration [GO:0009060]; iron-sulfur cluster assembly [GO:0016226]; NAD biosynthetic process [GO:0009435]; positive regulation of sulfur metabolic process [GO:0051176]
R40C1	R40C1	R40C1 family (one gene)
RAB28	RAB28	LEA type SMP family	cellular ion homeostasis [GO:0006873]; response to lithium ion [GO:0010226]; seed germination [GO:0009845]
RAB5	RAB5	Small GTPase superfamily, Rab family	intracellular protein transport [GO:0006886]; Rab protein signal transduction [GO:0032482]
RABA4D	RABA4D	Small GTPase superfamily, Rab family	intracellular protein transport [GO:0006886]; pollen tube development [GO:0048868]; pollen tube growth [GO:0009860]; Rab protein signal transduction [GO:0032482]; regulation of pollen tube growth [GO:0080092]
RABC1	RAB18,MtRAB18,AtRAB18,MdRAB18,CsRAB18	Small GTPase superfamily, Rab family	intracellular protein transport [GO:0006886]; Rab protein signal transduction [GO:0032482]
RACK1A	RACK1A	WD repeat G protein beta family, Ribosomal protein RACK1 subfamily	cellular response to abscisic acid stimulus [GO:0071215]; gibberellin mediated signaling pathway [GO:0010476]; positive regulation of protein phosphorylation [GO:0001934]; positive regulation of signal transduction [GO:0009967]; regulation of translation [GO:0006417]; rescue of stalled ribosome [GO:0072344]; response to cadmium ion [GO:0046686]; response to gibberellin [GO:0009739]; response to g…
RACK1C	RACK1C	WD repeat G protein beta family, Ribosomal protein RACK1 subfamily	cellular response to abscisic acid stimulus [GO:0071215]; positive regulation of protein phosphorylation [GO:0001934]; positive regulation of signal transduction [GO:0009967]; rescue of stalled ribosome [GO:0072344]; root development [GO:0048364]; seed germination [GO:0009845]; shoot system development [GO:0048367]; signal transduction [GO:0007165]
RAD	RAD,SmRAD	XPG/RAD2 endonuclease family, GEN subfamily	DNA repair [GO:0006281]; pollen development [GO:0009555]
RAD51	RAD51	RecA family, RAD51 subfamily	chromosome organization involved in meiotic cell cycle [GO:0070192]; DNA metabolic process [GO:0006259]; DNA recombinase assembly [GO:0000730]; double-strand break repair [GO:0006302]; double-strand break repair via synthesis-dependent strand annealing [GO:0045003]; mitotic recombination [GO:0006312]; mitotic recombination-dependent replication fork processing [GO:1990426]; reciprocal meiotic rec…
RALFL8	AtRALFL8	Plant rapid alkalinization factor (RALF) family	calcium-mediated signaling [GO:0019722]; cell-cell signaling [GO:0007267]
RAM1	ATA	GRAS family	arbuscular mycorrhizal association [GO:0036377]; regulation of transcription, DNA-templated [GO:0006355]; response to symbiotic fungus [GO:0009610]
RAN1	AtRAN1	Cation transport ATPase (P-type) (TC 3.A.3) family, Type IB subfamily	ethylene-activated signaling pathway [GO:0009873]; regulation of stomatal movement [GO:0010119]; response to ethylene [GO:0009723]
RAR1	RAR1,TaRAR1	RAR1 family (one gene)	defense response to bacterium [GO:0042742]; defense response to bacterium, incompatible interaction [GO:0009816]; defense response to fungus [GO:0050832]; defense response to fungus, incompatible interaction [GO:0009817]; plant-type hypersensitive response [GO:0009626]; protein stabilization [GO:0050821]; respiratory burst involved in defense response [GO:0002679]
RAS	RAS	Plant acyltransferase family
RAS1	RAS1	RAS1 family (one gene)	abscisic acid-activated signaling pathway [GO:0009738]; negative regulation of abscisic acid-activated signaling pathway [GO:0009788]; negative regulation of cellular hyperosmotic salinity response [GO:1900070]; response to abscisic acid [GO:0009737]; response to salt stress [GO:0009651]; transcription, DNA-templated [GO:0006351]
RAV	RAV,AtRAV,GhRAV,GoRAV,MtRAV	TFDB_GO: RAV transcription factor	TFDB_GO: RAV transcription factor
RAV1	RAV1,GhRAV1,MtRAV1	AP2/ERF transcription factor family, RAV subfamily	cellular response to hypoxia [GO:0071456]; ethylene-activated signaling pathway [GO:0009873]; lateral root development [GO:0048527]; leaf development [GO:0048366]; negative regulation of flower development [GO:0009910]; negative regulation of transcription, DNA-templated [GO:0045892]; response to brassinosteroid [GO:0009741]
RAV2	AtRAV2,RAV2,MtRAV2	AP2/ERF transcription factor family, RAV subfamily	cellular response to hypoxia [GO:0071456]; ethylene-activated signaling pathway [GO:0009873]; negative regulation of transcription, DNA-templated [GO:0045892]
RAX1	MYB37	RAX1 family (one gene)	axillary shoot meristem initiation [GO:0090506]; cell differentiation [GO:0030154]
RAX2	OsMYB38	RAX2 family (one gene)	blue light signaling pathway [GO:0009785]; cell differentiation [GO:0030154]; multicellular organism development [GO:0007275]
RAX3	GmMYB84,MYB84	RAX3 family (one gene)	cell differentiation [GO:0030154]; multicellular organism development [GO:0007275]
rbcS	rbcS	RuBisCO small chain family	carbon fixation [GO:0015977]; photorespiration [GO:0009853]; photosynthesis [GO:0015979]
RBCS-3B	ATS3B	RuBisCO small chain family	photorespiration [GO:0009853]; reductive pentose-phosphate cycle [GO:0019253]
rboh	rboh,Ccrboh,Vvrboh	NADPH oxidase catalytical subunit	DroughtDB Tags: Ion and Osmotic Homeostasis;Stomatal Movement
RBOHC	RHD2	RBOH (TC 5.B.1.3) family	aerobic respiration [GO:0009060]; oxidation-reduction process [GO:0055114]; response to ATP [GO:0033198]; root epidermal cell differentiation [GO:0010053]
rbohD	AtrbohD,VvrbohD,rbohD	NADPH oxidase catalytical subunit	DroughtDB Tags: Ion and Osmotic Homeostasis;Stomatal Movement
rbohF	AtrbohF	NADPH oxidase catalytical subunit	DroughtDB Tags: Ion and Osmotic Homeostasis;Stomatal Movement
RBOHF	RBOHF	RBOH (TC 5.B.1.3) family	abscisic acid-activated signaling pathway [GO:0009738]; carbohydrate homeostasis [GO:0033500]; defense response by callose deposition [GO:0052542]; ethylene-activated signaling pathway [GO:0009873]; hydrogen peroxide biosynthetic process [GO:0050665]; negative regulation of programmed cell death [GO:0043069]; osmosensory signaling pathway [GO:0007231]; oxidation-reduction process [GO:0055114]; re…
RCA1	RCA	RuBisCO activase family
RCAR	RCAR	Stephanie Manual Entry	Stephanie Manual Entry
RCCR	RCCR,CaRCCR	RCCR family (one gene)	chlorophyll catabolic process [GO:0015996]; defense response, incompatible interaction [GO:0009814]; regulation of plant-type hypersensitive response [GO:0010363]; regulation of programmed cell death [GO:0043067]
RCCR1	OsRCCR1	RCCR1 family (one gene)	chlorophyll catabolic process [GO:0015996]
RCD1	RCD1,AtRCD1	RCD1 family (one gene)	defense response to bacterium, incompatible interaction [GO:0009816]; embryo development ending in seed dormancy [GO:0009793]; ethylene-activated signaling pathway [GO:0009873]; jasmonic acid mediated signaling pathway [GO:0009867]; lateral root morphogenesis [GO:0010102]; nitric oxide biosynthetic process [GO:0006809]; programmed cell death [GO:0012501]; regulation of reactive oxygen species met…
RCI2A	RCI2A	UPF0057 (PMP3) family	hyperosmotic salinity response [GO:0042538]; response to abscisic acid [GO:0009737]; response to cold [GO:0009409]
RCN11	RCN11	Glycosyltransferase 61 family	posttranslational protein targeting to membrane, translocation [GO:0031204]; protein N-linked glycosylation [GO:0006487]; shoot system development [GO:0048367]
RD21A	RD21A	Peptidase C1 family	defense response to fungus [GO:0050832]; proteolysis [GO:0006508]; proteolysis involved in cellular protein catabolic process [GO:0051603]
RD22	RD22,AtRD22,GhRD22,MdRD22,CsRD22,GmRD22,CqRD22	RD22 family (one gene)	response to salt stress [GO:0009651]
rd29A	rd29A,Atrd29A	Stephanie Manual Entry	Stephanie Manual Entry
RD29A	RD29A,AtRD29A,GhRD29A,OsRD29A,CsRD29A,COR78,LTI78	LTI78/LTI65 family	circadian rhythm [GO:0007623]; hyperosmotic salinity response [GO:0042538]; leaf senescence [GO:0010150]; regulation of root development [GO:2000280]; response to abscisic acid [GO:0009737]; response to cold [GO:0009409]; response to mannitol [GO:0010555]; response to osmotic stress [GO:0006970]; response to reactive oxygen species [GO:0000302]; response to salt [GO:1902074]; response to salt str…
RDL4	OsCP1,CP1	CP1 family (one gene),Peptidase C1 family	hyperosmotic salinity response [GO:0042538],proteolysis involved in cellular protein catabolic process [GO:0051603]
RDL5	CP2	Peptidase C1 family	proteolysis involved in cellular protein catabolic process [GO:0051603]
RDR1	OsRDR1,RDR1	RdRP family	defense response [GO:0006952]; positive regulation of posttranscriptional gene silencing [GO:0060148]; production of siRNA involved in chromatin silencing by small RNA [GO:0070919]; production of siRNA involved in RNA interference [GO:0030422]; response to salicylic acid [GO:0009751]; response to virus [GO:0009615]; wax biosynthetic process [GO:0010025]
RDR2	RDR2	RdRP family	defense response to fungus [GO:0050832]; gene silencing [GO:0016458]; long-distance posttranscriptional gene silencing [GO:0010495]; production of siRNA involved in chromatin silencing by small RNA [GO:0070919]; production of siRNA involved in RNA interference [GO:0030422]
RDR6	RDR6,GhRDR6	RdRP family	carpel development [GO:0048440]; defense response to virus [GO:0051607]; gene silencing by RNA [GO:0031047]; gynoecium development [GO:0048467]; leaf development [GO:0048366]; maintenance of shoot apical meristem identity [GO:0010492]; production of siRNA involved in chromatin silencing by small RNA [GO:0070919]; production of siRNA involved in RNA interference [GO:0030422]; production of ta-siRN…
RDUF1	AtRDUF1	RDUF1 family (one gene)	abscisic acid-activated signaling pathway [GO:0009738]; protein autoubiquitination [GO:0051865]; protein ubiquitination [GO:0016567]; response to abscisic acid [GO:0009737]; response to chitin [GO:0010200]; response to water deprivation [GO:0009414]
RE	RE	RETICULATA family	chloroplast organization [GO:0009658]; leaf development [GO:0048366]; photoperiodism [GO:0009648]; plant organ development [GO:0099402]; response to reactive oxygen species [GO:0000302]
REM5	ARF22	REM5 family (one gene),TFDB_GO: ARF transcription factor	TFDB_GO: ARF transcription factor
REM6	SiREM6	REM6 family (one gene)
RFP	RFP	RING-finger protein, ortholog to AT SDIR1 (salt and drought -induced RING finger1)	DroughtDB Tags: Ion and Osmotic Homeostasis;Stomatal Movement;Regulatory Proteins;Post-translational Modification;Ubiquitin Ligases
RFS1	BoRS1,ZmRS1	Glycosyl hydrolases 36 family	carbohydrate metabolic process [GO:0005975]
RFS2	ZmRS2	Glycosyl hydrolases 36 family	raffinose catabolic process [GO:0034484]; response to karrikin [GO:0080167]; response to oxidative stress [GO:0006979]
RFT1	RFT1,OsFTL3	Phosphatidylethanolamine-binding protein family	cell differentiation [GO:0030154]; flower development [GO:0009908]; inflorescence development [GO:0010229]; photoperiodism, flowering [GO:0048573]; regulation of flower development [GO:0009909]; regulation of timing of transition from vegetative to reproductive phase [GO:0048510]; vegetative to reproductive phase transition of meristem [GO:0010228]
RG	RG	Glycosyl hydrolase 1 family	alkaloid biosynthetic process [GO:0009821]; carbohydrate metabolic process [GO:0005975]
RGA	RGA	GRAS family, DELLA subfamily	gibberellic acid mediated signaling pathway [GO:0009740]; hyperosmotic salinity response [GO:0042538]; jasmonic acid mediated signaling pathway [GO:0009867]; meiotic cytokinesis [GO:0033206]; multicellular organism development [GO:0007275]; negative regulation of developmental vegetative growth [GO:1905614]; negative regulation of gibberellic acid mediated signaling pathway [GO:0009938]; negative…
RGA1	VaRGA1,RGA1	Disease resistance NB-LRR family	defense response [GO:0006952]
RGA2	RB	Disease resistance NB-LRR family	defense response [GO:0006952]
RGB1	RGB1	WD repeat G protein beta family	G protein-coupled receptor signaling pathway [GO:0007186]
RGG1	RGG1	RGG1 family (one gene)	G protein-coupled receptor signaling pathway [GO:0007186]
RGGA	AtRGGA,StRGGA	RGGA protein family	abscisic acid-activated signaling pathway [GO:0009738]; cellular response to osmotic stress [GO:0071470]; cellular response to salt stress [GO:0071472]; regulation of abscisic acid-activated signaling pathway [GO:0009787]; response to abscisic acid [GO:0009737]; response to osmotic stress [GO:0006970]; response to salt stress [GO:0009651]
RGL1	RGL1	GRAS family, DELLA subfamily	cell differentiation [GO:0030154]; flower development [GO:0009908]; gibberellic acid mediated signaling pathway [GO:0009740]; hyperosmotic salinity response [GO:0042538]; jasmonic acid mediated signaling pathway [GO:0009867]; negative regulation of gibberellic acid mediated signaling pathway [GO:0009938]; negative regulation of seed germination [GO:0010187]; regulation of reactive oxygen species …
RGL3	RGL3,AtRGL3	GRAS family, DELLA subfamily	gibberellic acid mediated signaling pathway [GO:0009740]; hyperosmotic salinity response [GO:0042538]; jasmonic acid mediated signaling pathway [GO:0009867]; multicellular organism development [GO:0007275]; negative regulation of gibberellic acid mediated signaling pathway [GO:0009938]; negative regulation of seed germination [GO:0010187]; regulation of reactive oxygen species metabolic process […
RGLG1	RGLG1	RGLG1 family (one gene)	abscisic acid-activated signaling pathway [GO:0009738]; negative regulation of response to water deprivation [GO:0080148]; positive regulation of abscisic acid-activated signaling pathway [GO:0009789]; protein K63-linked ubiquitination [GO:0070534]
RGLG2	RGLG2	RGLG2 family (one gene)	abscisic acid-activated signaling pathway [GO:0009738]; auxin metabolic process [GO:0009850]; cytokinin metabolic process [GO:0009690]; negative regulation of response to water deprivation [GO:0080148]
RGS	RGS	Glutamine synthetase family	DroughtDB Tags: Growth Control;Root/Leaf Development;Regulatory Proteins;Signal Transduction;Others
RGS1	RGS1,AtRGS1	RGS1 family (one gene)	jasmonic acid mediated signaling pathway [GO:0009867]; negative regulation of signal transduction [GO:0009968]; positive regulation of GTPase activity [GO:0043547]; regulation of cell population proliferation [GO:0042127]; response to abscisic acid [GO:0009737]; response to glucose [GO:0009749]; response to water deprivation [GO:0009414]; sugar mediated signaling pathway [GO:0010182]
RH17	AtRH17	DEAD box helicase family, DDX31/DBP7 subfamily	response to salt stress [GO:0009651]; ribosome biogenesis [GO:0042254]
RH22	BrRH22	DEAD box helicase family
RH25	AtRH25	DEAD box helicase family	response to cold [GO:0009409]; response to salt stress [GO:0009651]; response to water deprivation [GO:0009414]
RH30	RH30	DEAD box helicase family, DDX5/DBP2 subfamily	nuclear-transcribed mRNA catabolic process, nonsense-mediated decay [GO:0000184]; rRNA processing [GO:0006364]
RH50	HEL	DEAD box helicase family	cellular defense response [GO:0006968]; cellular response to ethylene stimulus [GO:0071369]; cellular response to jasmonic acid stimulus [GO:0071395]; cellular response to salicylic acid stimulus [GO:0071446]; defense response to fungus, incompatible interaction [GO:0009817]
RH58	OsRH58	DEAD box helicase family
RH8	RH8	DEAD box helicase family, DDX6/DHH1 subfamily	cytoplasmic mRNA processing body assembly [GO:0033962]; mRNA processing [GO:0006397]; mRNA transport [GO:0051028]; regulation of translation [GO:0006417]; stress granule assembly [GO:0034063]; viral process [GO:0016032]
RH9	AtRH9	DEAD box helicase family, DDX21/DDX50 subfamily	Group II intron splicing [GO:0000373]; response to cold [GO:0009409]; response to salt stress [GO:0009651]; response to water deprivation [GO:0009414]; viral RNA genome replication [GO:0039694]
[truncated: 535 more rows]
