# Supplementary material for: Meta-Analysis Reveals Challenges and Gaps for Genome-to-Phenome Research Underpinning Plant Drought Response
Source: Int J Mol Sci. 2022 Oct 14;23(20):12297. doi: 10.3390/ijms232012297 (PMC9602940; doi:10.3390/ijms232012297)
Supplement: Supplementary file 1 [file ijms-23-12297-s001.zip › Table_S5.csv]

Table S5. Full list of phenotype words and their abstract counts identified in the consensus abstracts.
PhenoWord	NumberAbs
drought	1307
growth	940
development	845
salt	823
abscisic acid	726
cold	551
root	430
salinity	439
yield	235
heat	314
biosynthesis	323
stomatal	300
osmotic	275
seed	357
proline	267
germination	268
dehydration	262
developmental	196
reactive oxygen species	220
oxidative	197
antioxidant	212
photosynthesis	157
chlorophyll	180
water loss	192
light	115
biomass	121
flowering	105
seeds	123
ethylene	105
peroxidase	151
relative water content	132
salicylic acid	134
superoxide	129
phytohormone	121
reproductive	77
growing	65
cell wall	64
transpiration	105
recovery	66
auxin	72
grain yield	45
catalase	88
senescence	72
hydrogen peroxide	77
stomata	329
mature	69
fruit	56
desiccation	65
glutathione	69
phytohormones	41
flower	170
water potential	43
dehydrogenase	52
ascorbate peroxidase	60
water use efficiency	35
protect	43
peroxidation	38
lipid peroxidation	34
epidermal cells	44
rehydration	34
wax	35
cytosolic	35
storage	28
leaf senescence	33
wilting	33
cytokinin	41
gibberellin	38
antioxidants	20
xylem	25
dark	21
life cycle	27
toxic	29
cuticular	29
hydraulic	20
dormancy	24
leaf area	21
cytosol	60
maturation	25
conductivity	23
growth rate	30
cuticle	25
oxidation	55
trehalose	21
osmolytes	15
polyamine	31
membrane damage	28
permeability	24
glycine	29
reproduction	13
cell division	12
water uptake	9
compatible solute	15
water transport	16
transpirational water loss	23
electron transport	9
polyamines	15
turgor	15
translocation	19
bud	21
putrescine	18
spermidine	16
maturity	11
resurrection	20
water relations	13
cytokinins	14
ascorbic acid	16
osmoprotectants	9
branching	11
scavenger	11
thickness	16
wilt	55
cellulose	12
scavenge	19
hydration	285
protectant	10
brassinolides	1
phenophases	1
tissue water status	1
