# Supplementary material for: Meta-Analysis Reveals Challenges and Gaps for Genome-to-Phenome Research Underpinning Plant Drought Response
Source: Int J Mol Sci. 2022 Oct 14;23(20):12297. doi: 10.3390/ijms232012297 (PMC9602940; doi:10.3390/ijms232012297)
Supplement: Supplementary file 1 [file ijms-23-12297-s001.zip › Table_S6.csv]

Table S6. Full list of phenotype words used in this study and their respective drought response strategy(-ies).
Phrase	Area
branching	Avoidance
bulliform cells	Avoidance
carbon assimilation	Avoidance
carbon fixation	Avoidance
cell wall	Avoidance
cellulose	Avoidance
CO2 assimilation	Avoidance
CO2 influx	Avoidance
compact	Avoidance
cuticle	Avoidance
cuticular	Avoidance
dehydration	Avoidance
desiccation	Avoidance
epicuticular	Avoidance
epidermal cells	Avoidance
evapotranspiration	Avoidance
hemicellulose	Avoidance
hydration	Avoidance
hydraulic	Avoidance
hypocotyl	Avoidance
lamina	Avoidance
leaf area	Avoidance
leaf rolling	Avoidance
leaf senescence	Avoidance
membrane permeability	Avoidance
nutrient acquisition	Avoidance
nutrient uptake	Avoidance
paraheliotropism	Avoidance
parenchyma	Avoidance
pectin	Avoidance
permeability	Avoidance
photoinhibition	Avoidance
photorespiration	Avoidance
polysaccharides	Avoidance
reduced biomass	Avoidance
relative water content	Avoidance
reserve	Avoidance
rhizomes	Avoidance
root	Avoidance
root to shoot	Avoidance
senescence	Avoidance
shedding	Avoidance
solubilization	Avoidance
stiff	Avoidance
stomata	Avoidance
stomatal	Avoidance
storage	Avoidance
succulent	Avoidance
taproot	Avoidance
thickness	Avoidance
translocation	Avoidance
transpiration	Avoidance
transpirational water loss	Avoidance
trichomes	Avoidance
water conductance	Avoidance
water loss	Avoidance
water saving	Avoidance
water storage	Avoidance
water transport	Avoidance
water uptake	Avoidance
water use efficiency	Avoidance
wax	Avoidance
wilt	Avoidance
wilted	Avoidance
wilting	Avoidance
biomass	Avoidance;Recovery
cell differentiation	Avoidance;Recovery
cell division	Avoidance;Recovery
cell elongation	Avoidance;Recovery
cell expansion	Avoidance;Recovery
leaf expansion	Avoidance;Recovery
stem elongation	Avoidance;Recovery
carboxylase	Avoidance;Tolerance
carboxylation	Avoidance;Tolerance
carotenoids	Avoidance;Tolerance
conductivity	Avoidance;Tolerance
dikinase	Avoidance;Tolerance
irradiance	Avoidance;Tolerance
light harvesting	Avoidance;Tolerance
protect	Avoidance;Tolerance
protectant	Avoidance;Tolerance
rubisco	Avoidance;Tolerance
thylakoid membrane	Avoidance;Tolerance
turgor	Avoidance;Tolerance
light	Avoidance;Tolerance;General Stress
ATP synthesis	Avoidance;Tolerance;Recovery
chlorophyll	Avoidance;Tolerance;Recovery
electron transport	Avoidance;Tolerance;Recovery
nitrate reductase	Avoidance;Tolerance;Recovery
photosynthesis	Avoidance;Tolerance;Recovery
xylem	Avoidance;Tolerance;Recovery
ethylene	Detection
auxin	Detection;Avoidance;Recovery
auxins	Detection;Avoidance;Recovery
cytokinin	Detection;Avoidance;Recovery
cytokinins	Detection;Avoidance;Recovery
gibberellin	Detection;Avoidance;Recovery
gibberellins	Detection;Avoidance;Recovery
abscisic acid	Detection;Avoidance;Tolerance
biosynthesis	Detection;Avoidance;Tolerance
phytohormone	Detection;Avoidance;Tolerance
phytohormones	Detection;Avoidance;Tolerance
salicylic acid	Detection;Avoidance;Tolerance
water potential	Detection;Avoidance;Tolerance
water relations	Detection;Avoidance;Tolerance
xanthophylls	Detection;Avoidance;Tolerance
zeaxanthin	Detection;Avoidance;Tolerance
polyamine	Detection;Avoidance;Tolerance;Recovery
polyamines	Detection;Avoidance;Tolerance;Recovery
putrescine	Detection;Avoidance;Tolerance;Recovery
spermidine	Detection;Avoidance;Tolerance;Recovery
abortion	Escape
bud	Escape
dormancy	Escape
flower	Escape
flowering	Escape
fruit	Escape
grain yield	Escape
life cycle	Escape
maturation	Escape
mature	Escape
maturing	Escape
maturity	Escape
phenology	Escape
phenophases	Escape
reproduction	Escape
reproductive	Escape
seed	Escape
seeds	Escape
yield	Escape
germination	Escape;Avoidance
growing	Escape;Avoidance;Tolerance;Recovery
growth	Escape;Avoidance;Tolerance;Recovery
growth cycle	Escape;Avoidance;Tolerance;Recovery
growth rate	Escape;Avoidance;Tolerance;Recovery
development	Escape;Recovery
developmental	Escape;Recovery
cold	General Stress
dark	General Stress
drought	General Stress
heat	General Stress
salt	General Stress
salinity	General Stress;Tolerance
brassinosteroids	Recovery
recovery	Recovery
refilling	Recovery
regeneration	Recovery
rehydration	Recovery
resurrection	Recovery
turgidity	Recovery
antioxidant	Tolerance
antioxidants	Tolerance
ascorbate peroxidase	Tolerance
ascorbic acid	Tolerance
brassinolides	Tolerance
catalase	Tolerance
citrulline	Tolerance
compatible solute	Tolerance
cytosol	Tolerance
cytosolic	Tolerance
dehydroascorbate	Tolerance
dehydrogenase	Tolerance
glutathione	Tolerance
glutathione synthesis	Tolerance
glycine	Tolerance
glycinebetaine	Tolerance
glycolate oxidase	Tolerance
hydrogen peroxide	Tolerance
hydroxyl	Tolerance
leaf turgor	Tolerance
lipid peroxidation	Tolerance
membrane damage	Tolerance
monodehydroascorbate	Tolerance
organic acids	Tolerance
osmolytes	Tolerance
osmoprotectants	Tolerance
osmoregulation	Tolerance
osmosis	Tolerance
osmotic	Tolerance
oxidation	Tolerance
oxidative	Tolerance
peroxidase	Tolerance
peroxidation	Tolerance
peroxisome	Tolerance
polyols	Tolerance
polyphenol	Tolerance
proline	Tolerance
reactive oxygen species	Tolerance
scavenge	Tolerance
scavenger	Tolerance
superoxide	Tolerance
tissue water status	Tolerance
toxic	Tolerance
trehalose	Tolerance
